# Supplementary material for: Modification of a Single Atom Affects the Physical Properties of Double Fluorinated Fmoc-Phe Derivatives
Source: Int J Mol Sci. 2021 Sep 6;22(17):9634. doi: 10.3390/ijms22179634 (PMC8431810; doi:10.3390/ijms22179634)
Supplement: Supplementary file 1 [file ijms-22-09634-s001.zip]

Archive with 6 entries (6 files):
- FmocF3,4-checkcif.pdf
- ijms-1331669-supple after proof.pdf
- lihi2.final.cif
- Movie S1 - Fmoc-Phe.mp4
- Movie S2 - Fmoc-3,4F.mp4
- Movie S3 - Fmoc-3,5F.mp4
