# Supplementary material for: Modification of a Single Atom Affects the Physical Properties of Double Fluorinated Fmoc-Phe Derivatives
Source: Int J Mol Sci. 2021 Sep 6;22(17):9634. doi: 10.3390/ijms22179634 (PMC8431810; doi:10.3390/ijms22179634)
Supplement: Supplementary file 1 [file ijms-22-09634-s001.zip › lihi2.final.cif]

 
data_lihi2f
#fmoc-3,4F-Phe
# structure Linda JW Shimon, WIS
 
_audit_creation_method            SHELXL-2013
_chemical_name_systematic
;
 ?
;
_chemical_name_common             ?
_chemical_melting_point           ?
_chemical_formula_moiety          'C24 H19 F2 N O4, C2 H6 O S'
_chemical_formula_sum
 'C26 H25 F2 N O5 S' 
_chemical_formula_weight          501.53

loop_
 _atom_type_symbol
 _atom_type_description
 _atom_type_scat_dispersion_real
 _atom_type_scat_dispersion_imag
 _atom_type_scat_source
 'C'  'C'   0.0181   0.0091
 'International Tables Vol C Tables 4.2.6.8 and 6.1.1.4'
 'H'  'H'   0.0000   0.0000
 'International Tables Vol C Tables 4.2.6.8 and 6.1.1.4'
 'N'  'N'   0.0311   0.0180
 'International Tables Vol C Tables 4.2.6.8 and 6.1.1.4'
 'O'  'O'   0.0492   0.0322
 'International Tables Vol C Tables 4.2.6.8 and 6.1.1.4'
 'F'  'F'   0.0727   0.0534
 'International Tables Vol C Tables 4.2.6.8 and 6.1.1.4'
 'S'  'S'   0.3331   0.5567
 'International Tables Vol C Tables 4.2.6.8 and 6.1.1.4'
 
_space_group_crystal_system       orthorhombic
_space_group_IT_number            19
_space_group_name_H-M_alt         'P 21 21 21'
_space_group_name_Hall            'P 2ac 2ab'
 
_shelx_space_group_comment
;
The symmetry employed for this shelxl refinement is uniquely defined
by the following loop, which should always be used as a source of
symmetry information in preference to the above space-group names.
They are only intended as comments.
;
 
loop_
 _space_group_symop_operation_xyz
 'x, y, z'
 '-x+1/2, -y, z+1/2'
 '-x, y+1/2, -z+1/2'
 'x+1/2, -y+1/2, -z'
 
_cell_length_a                    4.98260(10)
_cell_length_b                    13.0717(2)
_cell_length_c                    36.5189(5)
_cell_angle_alpha                 90
_cell_angle_beta                  90
_cell_angle_gamma                 90
_cell_volume                      2378.51(7)
_cell_formula_units_Z             4
_cell_measurement_temperature     100(2)
_cell_measurement_reflns_used   7663
_cell_measurement_theta_min     3.5750
_cell_measurement_theta_max     79.3500
 
_exptl_crystal_description        needle 
_exptl_crystal_colour             'colourless' 
_exptl_crystal_density_meas       ? 
_exptl_crystal_density_method     ?              
_exptl_crystal_density_diffrn     1.401          
_exptl_crystal_F_000              1048
_exptl_transmission_factor_min    ?                                             
_exptl_transmission_factor_max    ?                                             
_exptl_crystal_size_max           0.200
_exptl_crystal_size_mid           0.010
_exptl_crystal_size_min           0.010
_exptl_absorpt_coefficient_mu     1.684
_shelx_estimated_absorpt_T_min    0.729
_shelx_estimated_absorpt_T_max    0.983
_exptl_absorpt_correction_T_min                   0.55645
_exptl_absorpt_correction_T_max                   1.00000
_exptl_absorpt_correction_type            multi-scan
_exptl_absorpt_process_details
;
CrysAlisPro 1.171.40.69a (Rigaku Oxford Diffraction, 2020)
Empirical absorption correction using spherical harmonics,
 implemented in SCALE3 ABSPACK scaling algorithm.
;
_oxdiff_exptl_absorpt_empirical_full_min           0.405
_oxdiff_exptl_absorpt_empirical_full_max           1.886
_oxdiff_exptl_absorpt_empirical_details
;
Empirical correction (ABSPACK) includes:
- Absorption correction using spherical harmonics
- Frame scaling
;
 
_exptl_special_details
;
 ?
;
 
_diffrn_ambient_temperature       100(2)
_diffrn_radiation_wavelength      1.54184
_diffrn_radiation_type            CuK\a
_diffrn_source                    'micro-focus sealed X-ray tube'                       
_diffrn_measurement_device_type   'XtaLAB AFC12 (RINC): Kappa dual home/near' 
_diffrn_measurement_method        '\w scans' 
_diffrn_detector_area_resol_mean  ? 
_diffrn_reflns_number             11429
_diffrn_reflns_av_unetI/netI      0.0340
_diffrn_reflns_av_R_equivalents   0.0319
_diffrn_reflns_limit_h_min        -5
_diffrn_reflns_limit_h_max        6
_diffrn_reflns_limit_k_min        -16
_diffrn_reflns_limit_k_max        13
_diffrn_reflns_limit_l_min        -42
_diffrn_reflns_limit_l_max        45
_diffrn_reflns_theta_min          3.591
_diffrn_reflns_theta_max          79.703
_diffrn_reflns_theta_full         67.684
_diffrn_measured_fraction_theta_max   0.977
_diffrn_measured_fraction_theta_full  0.996
_diffrn_reflns_Laue_measured_fraction_max    0.977
_diffrn_reflns_Laue_measured_fraction_full   0.996
_diffrn_reflns_point_group_measured_fraction_max   0.935
_diffrn_reflns_point_group_measured_fraction_full  0.981
_reflns_number_total              4854
_reflns_number_gt                 4634
_reflns_threshold_expression      'I > 2\s(I)'
_reflns_Friedel_coverage          0.631
_reflns_Friedel_fraction_max      0.874
_reflns_Friedel_fraction_full     0.961
 
_reflns_special_details
;
 Reflections were merged by SHELXL according to the crystal
 class for the calculation of statistics and refinement.
 
 _reflns_Friedel_fraction is defined as the number of unique
 Friedel pairs measured divided by the number that would be
 possible theoretically, ignoring centric projections and
 systematic absences.
;
 
_computing_data_collection        'CrysAlisPro 1.171.40.69a (Rigaku OD, 2020)'
_computing_cell_refinement        'CrysAlisPro 1.171.40.69a (Rigaku OD, 2020)'
_computing_data_reduction         'CrysAlisPro 1.171.40.69a (Rigaku OD, 2020)'
_computing_structure_solution     'SHELXT-2013 (Sheldrick, 2013)'
_computing_structure_refinement   'SHELXL-2013 (Sheldrick, 2013)'
_computing_molecular_graphics     'Olex2 (Dolomanov 2016)'
_computing_publication_material   'SHELXL-2013 (Sheldrick, 2013)'
 
_refine_special_details
;
 ?
;
_refine_ls_structure_factor_coef  Fsqd
_refine_ls_matrix_type            full
_refine_ls_weighting_scheme       calc
_refine_ls_weighting_details
'w=1/[\s^2^(Fo^2^)+(0.0882P)^2^+2.1522P] where P=(Fo^2^+2Fc^2^)/3'
_atom_sites_solution_primary      ?
_atom_sites_solution_secondary    ?
_atom_sites_solution_hydrogens    geom
_refine_ls_hydrogen_treatment     constr
_refine_ls_extinction_method      none
_refine_ls_extinction_coef        .
_refine_ls_abs_structure_details
;
 Flack x determined using 1747 quotients [(I+)-(I-)]/[(I+)+(I-)]
 (Parsons and Flack (2004), Acta Cryst. A60, s61).
;
_refine_ls_abs_structure_Flack    0.022(11)
_chemical_absolute_configuration  'rmad'
_refine_ls_number_reflns          4854
_refine_ls_number_parameters      342
_refine_ls_number_restraints      20
_refine_ls_R_factor_all           0.0568
_refine_ls_R_factor_gt            0.0550
_refine_ls_wR_factor_ref          0.1533
_refine_ls_wR_factor_gt           0.1517
_refine_ls_goodness_of_fit_ref    1.057
_refine_ls_restrained_S_all       1.109
_refine_ls_shift/su_max           0.000
_refine_ls_shift/su_mean          0.000
 
loop_
 _atom_site_label
 _atom_site_type_symbol
 _atom_site_fract_x
 _atom_site_fract_y
 _atom_site_fract_z
 _atom_site_U_iso_or_equiv
 _atom_site_adp_type
 _atom_site_occupancy
 _atom_site_site_symmetry_order  
 _atom_site_calc_flag
 _atom_site_refinement_flags_posn
 _atom_site_refinement_flags_adp
 _atom_site_refinement_flags_occupancy
 _atom_site_disorder_assembly
 _atom_site_disorder_group
O1 O 0.7158(5) 0.60763(17) 0.61228(7) 0.0197(5) Uani 1 1 d . . . . .
O2 O 1.0347(5) 0.7307(2) 0.61798(9) 0.0331(7) Uani 1 1 d . . . . .
O3 O 0.3776(13) 0.8429(3) 0.69646(12) 0.0853(19) Uani 1 1 d . U . . .
O4 O 0.6069(11) 0.9818(3) 0.69049(11) 0.0711(15) Uani 1 1 d . U . . .
H4O H 0.5076 1.0034 0.7074 0.107 Uiso 1 1 calc R U . . .
F1 F 0.6350(6) 0.7997(2) 0.48973(7) 0.0422(6) Uani 1 1 d . . . . .
F2 F 1.0508(6) 0.9210(2) 0.47836(7) 0.0476(8) Uani 1 1 d . . . . .
N1 N 0.5984(6) 0.7604(2) 0.63339(8) 0.0190(6) Uani 1 1 d . . . . .
H1A H 0.4392 0.7324 0.6364 0.023 Uiso 1 1 calc R U . . .
C1 C 0.7975(7) 0.4363(2) 0.59087(9) 0.0187(7) Uani 1 1 d . . . . .
H1 H 0.6323 0.4402 0.5754 0.022 Uiso 1 1 calc R U . . .
C2 C 1.0066(7) 0.3684(2) 0.57304(9) 0.0180(7) Uani 1 1 d . . . . .
C3 C 1.1313(7) 0.3787(3) 0.53911(9) 0.0204(7) Uani 1 1 d . . . . .
H3 H 1.0823 0.4324 0.5229 0.024 Uiso 1 1 calc R U . . .
C4 C 1.3297(8) 0.3084(3) 0.52941(10) 0.0221(7) Uani 1 1 d . . . . .
H4 H 1.4160 0.3144 0.5063 0.026 Uiso 1 1 calc R U . . .
C5 C 1.4034(8) 0.2297(3) 0.55302(11) 0.0246(7) Uani 1 1 d . . . . .
H5 H 1.5404 0.1831 0.5460 0.029 Uiso 1 1 calc R U . . .
C6 C 1.2771(8) 0.2188(3) 0.58686(11) 0.0238(7) Uani 1 1 d . . . . .
H6 H 1.3291 0.1658 0.6032 0.029 Uiso 1 1 calc R U . . .
C7 C 1.0731(7) 0.2870(2) 0.59645(9) 0.0191(7) Uani 1 1 d . . . . .
C8 C 0.9040(8) 0.2925(3) 0.62898(10) 0.0214(7) Uani 1 1 d . . . . .
C9 C 0.8783(9) 0.2251(3) 0.65849(11) 0.0287(8) Uani 1 1 d . . . . .
H9 H 0.9892 0.1661 0.6603 0.034 Uiso 1 1 calc R U . . .
C10 C 0.6868(9) 0.2462(3) 0.68506(12) 0.0333(9) Uani 1 1 d . . . . .
H10 H 0.6640 0.2006 0.7051 0.040 Uiso 1 1 calc R U . . .
C11 C 0.5281(9) 0.3333(4) 0.68271(12) 0.0337(9) Uani 1 1 d . . . . .
H11 H 0.4004 0.3470 0.7014 0.040 Uiso 1 1 calc R U . . .
C12 C 0.5530(8) 0.4013(3) 0.65324(10) 0.0271(8) Uani 1 1 d . . . . .
H12 H 0.4437 0.4607 0.6518 0.032 Uiso 1 1 calc R U . . .
C13 C 0.7401(7) 0.3799(3) 0.62638(9) 0.0195(7) Uani 1 1 d . . . . .
C14 C 0.9191(7) 0.5425(3) 0.59617(10) 0.0202(7) Uani 1 1 d . . . . .
H14A H 1.0774 0.5385 0.6125 0.024 Uiso 1 1 calc R U . . .
H14B H 0.9774 0.5707 0.5723 0.024 Uiso 1 1 calc R U . . .
C15 C 0.8018(7) 0.7030(3) 0.62098(10) 0.0187(7) Uani 1 1 d . . . . .
C16 C 0.6358(7) 0.8673(2) 0.64194(9) 0.0177(6) Uani 1 1 d . . . . .
H16 H 0.8329 0.8818 0.6422 0.021 Uiso 1 1 calc R U . . .
C17 C 0.5223(7) 0.8939(3) 0.67963(10) 0.0217(7) Uani 1 1 d . . . . .
C18 C 0.5042(8) 0.9373(3) 0.61295(10) 0.0223(7) Uani 1 1 d . . . . .
H18A H 0.3144 0.9167 0.6097 0.027 Uiso 1 1 calc R U . . .
H18B H 0.5064 1.0087 0.6219 0.027 Uiso 1 1 calc R U . . .
C19 C 0.6433(8) 0.9327(3) 0.57652(10) 0.0215(7) Uani 1 1 d . . . . .
C20 C 0.5650(8) 0.8624(3) 0.54996(10) 0.0241(7) Uani 1 1 d . . . . .
H20 H 0.4209 0.8165 0.5544 0.029 Uiso 1 1 calc R U . . .
C21 C 0.7026(9) 0.8609(3) 0.51678(11) 0.0310(9) Uani 1 1 d . . . . .
C22 C 0.9175(9) 0.9261(4) 0.51072(12) 0.0370(10) Uani 1 1 d . . . . .
C23 C 0.9961(9) 0.9953(3) 0.53645(13) 0.0341(9) Uani 1 1 d . . . . .
H23 H 1.1427 1.0401 0.5320 0.041 Uiso 1 1 calc R U . . .
C24 C 0.8563(8) 0.9987(3) 0.56941(11) 0.0283(8) Uani 1 1 d . . . . .
H24 H 0.9075 1.0472 0.5875 0.034 Uiso 1 1 calc R U . . .
C26 C 0.004(2) 1.0352(9) 0.7942(3) 0.056(3) Uani 0.528(10) 1 d D . P A 1
H26A H -0.0146 0.9607 0.7925 0.084 Uiso 0.528(10) 1 calc R U P A 1
H26B H -0.1705 1.0657 0.8001 0.084 Uiso 0.528(10) 1 calc R U P A 1
H26C H 0.1333 1.0523 0.8135 0.084 Uiso 0.528(10) 1 calc R U P A 1
C27 C 0.111(2) 1.2224(7) 0.7673(3) 0.049(3) Uani 0.528(10) 1 d D . P A 1
H27A H 0.2536 1.2334 0.7854 0.074 Uiso 0.528(10) 1 calc R U P A 1
H27B H -0.0636 1.2362 0.7786 0.074 Uiso 0.528(10) 1 calc R U P A 1
H27C H 0.1376 1.2685 0.7465 0.074 Uiso 0.528(10) 1 calc R U P A 1
C28 C 0.065(3) 1.1524(10) 0.7892(4) 0.067(5) Uani 0.472(10) 1 d D . P A 2
H28A H 0.1136 1.1110 0.8106 0.100 Uiso 0.472(10) 1 calc R U P A 2
H28B H -0.1256 1.1706 0.7906 0.100 Uiso 0.472(10) 1 calc R U P A 2
H28C H 0.1737 1.2148 0.7889 0.100 Uiso 0.472(10) 1 calc R U P A 2
C29 C -0.031(2) 0.9620(7) 0.7633(3) 0.040(3) Uani 0.472(10) 1 d D . P A 2
H29A H -0.0219 0.9153 0.7423 0.060 Uiso 0.472(10) 1 calc R U P A 2
H29B H -0.2194 0.9728 0.7701 0.060 Uiso 0.472(10) 1 calc R U P A 2
H29C H 0.0658 0.9322 0.7840 0.060 Uiso 0.472(10) 1 calc R U P A 2
S1 S 0.1217(2) 1.08499(10) 0.75086(3) 0.0406(3) Uani 1 1 d D . . . .
O6 O 0.4177(7) 1.0590(3) 0.75021(9) 0.0431(8) Uani 1 1 d . . . . .
 
loop_
 _atom_site_aniso_label
 _atom_site_aniso_U_11
 _atom_site_aniso_U_22
 _atom_site_aniso_U_33
 _atom_site_aniso_U_23
 _atom_site_aniso_U_13
 _atom_site_aniso_U_12
O1 0.0149(11) 0.0128(10) 0.0314(12) -0.0047(9) 0.0003(10) 0.0006(9)
O2 0.0119(12) 0.0249(13) 0.062(2) -0.0171(13) -0.0026(13) 0.0016(10)
O3 0.143(5) 0.054(2) 0.058(2) -0.0272(19) 0.063(3) -0.059(3)
O4 0.105(4) 0.048(2) 0.060(2) -0.0369(18) 0.052(2) -0.043(2)
F1 0.0429(15) 0.0465(14) 0.0373(13) -0.0084(11) -0.0014(12) -0.0008(13)
F2 0.0487(18) 0.0562(17) 0.0380(14) 0.0166(12) 0.0173(12) 0.0138(14)
N1 0.0154(14) 0.0135(12) 0.0281(15) -0.0029(11) 0.0014(12) -0.0007(11)
C1 0.0168(16) 0.0174(14) 0.0218(15) -0.0027(12) -0.0036(13) 0.0012(13)
C2 0.0160(15) 0.0140(14) 0.0240(16) -0.0039(12) -0.0040(13) 0.0000(12)
C3 0.0205(17) 0.0183(14) 0.0223(16) -0.0008(12) -0.0037(14) -0.0014(13)
C4 0.0184(17) 0.0230(15) 0.0248(17) -0.0070(13) 0.0006(14) -0.0019(13)
C5 0.0187(17) 0.0193(15) 0.0357(19) -0.0072(14) -0.0009(15) 0.0002(14)
C6 0.0220(18) 0.0163(14) 0.0331(19) -0.0015(13) -0.0041(16) 0.0033(14)
C7 0.0182(16) 0.0154(14) 0.0236(16) -0.0015(12) -0.0043(13) -0.0007(13)
C8 0.0198(17) 0.0193(15) 0.0252(17) 0.0000(13) -0.0054(14) -0.0003(14)
C9 0.0273(19) 0.0252(17) 0.0336(19) 0.0061(15) -0.0034(17) -0.0026(16)
C10 0.030(2) 0.038(2) 0.032(2) 0.0106(17) 0.0004(17) -0.0035(18)
C11 0.023(2) 0.047(2) 0.031(2) 0.0006(18) 0.0054(16) 0.0011(18)
C12 0.0214(19) 0.0316(18) 0.0281(18) -0.0037(15) -0.0013(15) 0.0025(15)
C13 0.0161(16) 0.0190(15) 0.0233(16) -0.0012(13) -0.0037(13) -0.0006(13)
C14 0.0149(15) 0.0170(15) 0.0288(17) -0.0043(13) -0.0012(13) 0.0061(13)
C15 0.0137(16) 0.0189(14) 0.0235(16) -0.0055(12) -0.0014(13) -0.0002(12)
C16 0.0173(16) 0.0141(14) 0.0218(15) -0.0029(11) -0.0003(13) -0.0010(12)
C17 0.0212(17) 0.0207(15) 0.0232(16) -0.0027(13) -0.0011(14) 0.0040(14)
C18 0.0233(17) 0.0190(15) 0.0246(16) 0.0000(13) -0.0024(14) 0.0055(14)
C19 0.0200(16) 0.0188(15) 0.0258(17) 0.0042(13) -0.0043(14) 0.0022(14)
C20 0.0208(18) 0.0240(16) 0.0276(18) 0.0019(14) -0.0005(15) 0.0024(14)
C21 0.035(2) 0.0336(19) 0.0241(18) -0.0005(15) -0.0046(16) 0.0125(17)
C22 0.032(2) 0.047(2) 0.032(2) 0.0200(18) 0.0131(18) 0.0172(19)
C23 0.0231(19) 0.037(2) 0.042(2) 0.0169(18) 0.0017(18) 0.0008(17)
C24 0.0265(19) 0.0238(16) 0.035(2) 0.0093(15) -0.0047(17) 0.0029(16)
C26 0.031(5) 0.076(7) 0.062(7) 0.030(6) 0.000(5) -0.001(5)
C27 0.049(6) 0.042(5) 0.057(6) -0.002(4) 0.013(5) 0.010(5)
C28 0.044(7) 0.050(7) 0.108(12) -0.034(7) 0.017(7) 0.006(5)
C29 0.035(5) 0.042(5) 0.043(5) 0.006(4) 0.002(4) 0.001(4)
S1 0.0365(6) 0.0537(7) 0.0315(5) 0.0105(5) -0.0092(5) -0.0102(5)
O6 0.0415(18) 0.0497(18) 0.0380(16) -0.0164(15) 0.0126(15) -0.0103(15)
 
_geom_special_details
;
 All esds (except the esd in the dihedral angle between two l.s. planes)
 are estimated using the full covariance matrix.  The cell esds are taken
 into account individually in the estimation of esds in distances, angles
 and torsion angles; correlations between esds in cell parameters are only
 used when they are defined by crystal symmetry.  An approximate (isotropic)
 treatment of cell esds is used for estimating esds involving l.s. planes.
;
 
loop_
 _geom_bond_atom_site_label_1
 _geom_bond_atom_site_label_2
 _geom_bond_distance
 _geom_bond_site_symmetry_2
 _geom_bond_publ_flag
O1 C15 1.356(4) . ?
O1 C14 1.448(4) . ?
O2 C15 1.220(5) . ?
O3 C17 1.158(5) . ?
O4 C17 1.286(5) . ?
O4 H4O 0.8400 . ?
F1 C21 1.316(5) . ?
F2 C22 1.357(5) . ?
N1 C15 1.339(4) . ?
N1 C16 1.445(4) . ?
N1 H1A 0.8800 . ?
C1 C2 1.516(5) . ?
C1 C13 1.519(5) . ?
C1 C14 1.527(5) . ?
C1 H1 1.0000 . ?
C2 C3 1.393(5) . ?
C2 C7 1.405(5) . ?
C3 C4 1.395(5) . ?
C3 H3 0.9500 . ?
C4 C5 1.392(5) . ?
C4 H4 0.9500 . ?
C5 C6 1.394(6) . ?
C5 H5 0.9500 . ?
C6 C7 1.396(5) . ?
C6 H6 0.9500 . ?
C7 C8 1.458(5) . ?
C8 C9 1.398(5) . ?
C8 C13 1.407(5) . ?
C9 C10 1.389(6) . ?
C9 H9 0.9500 . ?
C10 C11 1.389(6) . ?
C10 H10 0.9500 . ?
C11 C12 1.401(6) . ?
C11 H11 0.9500 . ?
C12 C13 1.382(5) . ?
C12 H12 0.9500 . ?
C14 H14A 0.9900 . ?
C14 H14B 0.9900 . ?
C16 C17 1.528(5) . ?
C16 C18 1.545(5) . ?
C16 H16 1.0000 . ?
C18 C19 1.501(5) . ?
C18 H18A 0.9900 . ?
C18 H18B 0.9900 . ?
C19 C24 1.392(6) . ?
C19 C20 1.392(5) . ?
C20 C21 1.392(6) . ?
C20 H20 0.9500 . ?
C21 C22 1.386(7) . ?
C22 C23 1.362(7) . ?
C23 C24 1.391(6) . ?
C23 H23 0.9500 . ?
C24 H24 0.9500 . ?
C26 S1 1.808(9) . ?
C26 H26A 0.9800 . ?
C26 H26B 0.9800 . ?
C26 H26C 0.9800 . ?
C27 S1 1.894(9) . ?
C27 H27A 0.9800 . ?
C27 H27B 0.9800 . ?
C27 H27C 0.9800 . ?
C28 S1 1.679(11) . ?
C28 H28A 0.9800 . ?
C28 H28B 0.9800 . ?
C28 H28C 0.9800 . ?
C29 S1 1.836(9) . ?
C29 H29A 0.9800 . ?
C29 H29B 0.9800 . ?
C29 H29C 0.9800 . ?
S1 O6 1.514(4) . ?
 
loop_
 _geom_angle_atom_site_label_1
 _geom_angle_atom_site_label_2
 _geom_angle_atom_site_label_3
 _geom_angle
 _geom_angle_site_symmetry_1
 _geom_angle_site_symmetry_3
 _geom_angle_publ_flag
C15 O1 C14 114.5(3) . . ?
C17 O4 H4O 109.5 . . ?
C15 N1 C16 121.1(3) . . ?
C15 N1 H1A 119.4 . . ?
C16 N1 H1A 119.4 . . ?
C2 C1 C13 102.2(3) . . ?
C2 C1 C14 108.3(3) . . ?
C13 C1 C14 114.1(3) . . ?
C2 C1 H1 110.6 . . ?
C13 C1 H1 110.6 . . ?
C14 C1 H1 110.6 . . ?
C3 C2 C7 120.6(3) . . ?
C3 C2 C1 129.2(3) . . ?
C7 C2 C1 110.1(3) . . ?
C2 C3 C4 118.6(3) . . ?
C2 C3 H3 120.7 . . ?
C4 C3 H3 120.7 . . ?
C5 C4 C3 121.1(3) . . ?
C5 C4 H4 119.5 . . ?
C3 C4 H4 119.5 . . ?
C4 C5 C6 120.4(3) . . ?
C4 C5 H5 119.8 . . ?
C6 C5 H5 119.8 . . ?
C5 C6 C7 119.1(3) . . ?
C5 C6 H6 120.5 . . ?
C7 C6 H6 120.5 . . ?
C6 C7 C2 120.2(3) . . ?
C6 C7 C8 131.0(3) . . ?
C2 C7 C8 108.8(3) . . ?
C9 C8 C13 120.7(4) . . ?
C9 C8 C7 130.5(3) . . ?
C13 C8 C7 108.7(3) . . ?
C10 C9 C8 118.4(4) . . ?
C10 C9 H9 120.8 . . ?
C8 C9 H9 120.8 . . ?
C11 C10 C9 120.8(4) . . ?
C11 C10 H10 119.6 . . ?
C9 C10 H10 119.6 . . ?
C10 C11 C12 121.1(4) . . ?
C10 C11 H11 119.4 . . ?
C12 C11 H11 119.4 . . ?
C13 C12 C11 118.5(4) . . ?
C13 C12 H12 120.8 . . ?
C11 C12 H12 120.8 . . ?
C12 C13 C8 120.5(3) . . ?
C12 C13 C1 129.4(3) . . ?
C8 C13 C1 110.0(3) . . ?
O1 C14 C1 108.0(3) . . ?
O1 C14 H14A 110.1 . . ?
C1 C14 H14A 110.1 . . ?
O1 C14 H14B 110.1 . . ?
C1 C14 H14B 110.1 . . ?
H14A C14 H14B 108.4 . . ?
O2 C15 N1 125.7(3) . . ?
O2 C15 O1 123.5(3) . . ?
N1 C15 O1 110.8(3) . . ?
N1 C16 C17 111.5(3) . . ?
N1 C16 C18 111.7(3) . . ?
C17 C16 C18 109.0(3) . . ?
N1 C16 H16 108.2 . . ?
C17 C16 H16 108.2 . . ?
C18 C16 H16 108.2 . . ?
O3 C17 O4 123.7(4) . . ?
O3 C17 C16 125.2(3) . . ?
O4 C17 C16 111.1(3) . . ?
C19 C18 C16 112.8(3) . . ?
C19 C18 H18A 109.0 . . ?
C16 C18 H18A 109.0 . . ?
C19 C18 H18B 109.0 . . ?
C16 C18 H18B 109.0 . . ?
H18A C18 H18B 107.8 . . ?
C24 C19 C20 119.5(4) . . ?
C24 C19 C18 119.5(3) . . ?
C20 C19 C18 120.9(3) . . ?
C19 C20 C21 118.5(4) . . ?
C19 C20 H20 120.7 . . ?
C21 C20 H20 120.7 . . ?
F1 C21 C22 116.9(4) . . ?
F1 C21 C20 122.4(4) . . ?
C22 C21 C20 120.7(4) . . ?
F2 C22 C23 119.5(4) . . ?
F2 C22 C21 119.1(4) . . ?
C23 C22 C21 121.4(4) . . ?
C22 C23 C24 118.3(4) . . ?
C22 C23 H23 120.8 . . ?
C24 C23 H23 120.8 . . ?
C23 C24 C19 121.5(4) . . ?
C23 C24 H24 119.2 . . ?
C19 C24 H24 119.2 . . ?
S1 C26 H26A 109.5 . . ?
S1 C26 H26B 109.5 . . ?
H26A C26 H26B 109.5 . . ?
S1 C26 H26C 109.5 . . ?
H26A C26 H26C 109.5 . . ?
H26B C26 H26C 109.5 . . ?
S1 C27 H27A 109.5 . . ?
S1 C27 H27B 109.5 . . ?
H27A C27 H27B 109.5 . . ?
S1 C27 H27C 109.5 . . ?
H27A C27 H27C 109.5 . . ?
H27B C27 H27C 109.5 . . ?
S1 C28 H28A 109.5 . . ?
S1 C28 H28B 109.5 . . ?
H28A C28 H28B 109.5 . . ?
S1 C28 H28C 109.5 . . ?
H28A C28 H28C 109.5 . . ?
H28B C28 H28C 109.5 . . ?
S1 C29 H29A 109.5 . . ?
S1 C29 H29B 109.5 . . ?
H29A C29 H29B 109.5 . . ?
S1 C29 H29C 109.5 . . ?
H29A C29 H29C 109.5 . . ?
H29B C29 H29C 109.5 . . ?
O6 S1 C28 107.2(5) . . ?
O6 S1 C26 104.4(4) . . ?
O6 S1 C29 102.2(4) . . ?
C28 S1 C29 100.6(6) . . ?
O6 S1 C27 104.2(4) . . ?
C26 S1 C27 93.1(5) . . ?
 
loop_
 _geom_torsion_atom_site_label_1
 _geom_torsion_atom_site_label_2
 _geom_torsion_atom_site_label_3
 _geom_torsion_atom_site_label_4
 _geom_torsion
 _geom_torsion_site_symmetry_1
 _geom_torsion_site_symmetry_2
 _geom_torsion_site_symmetry_3
 _geom_torsion_site_symmetry_4
 _geom_torsion_publ_flag
C13 C1 C2 C3 177.7(3) . . . . ?
C14 C1 C2 C3 -61.5(5) . . . . ?
C13 C1 C2 C7 -3.4(4) . . . . ?
C14 C1 C2 C7 117.4(3) . . . . ?
C7 C2 C3 C4 -2.1(5) . . . . ?
C1 C2 C3 C4 176.7(3) . . . . ?
C2 C3 C4 C5 -0.2(5) . . . . ?
C3 C4 C5 C6 0.7(5) . . . . ?
C4 C5 C6 C7 1.0(5) . . . . ?
C5 C6 C7 C2 -3.3(5) . . . . ?
C5 C6 C7 C8 178.3(4) . . . . ?
C3 C2 C7 C6 3.9(5) . . . . ?
C1 C2 C7 C6 -175.1(3) . . . . ?
C3 C2 C7 C8 -177.4(3) . . . . ?
C1 C2 C7 C8 3.6(4) . . . . ?
C6 C7 C8 C9 -7.3(7) . . . . ?
C2 C7 C8 C9 174.1(4) . . . . ?
C6 C7 C8 C13 176.2(4) . . . . ?
C2 C7 C8 C13 -2.3(4) . . . . ?
C13 C8 C9 C10 0.2(6) . . . . ?
C7 C8 C9 C10 -175.9(4) . . . . ?
C8 C9 C10 C11 -1.2(6) . . . . ?
C9 C10 C11 C12 1.1(7) . . . . ?
C10 C11 C12 C13 -0.1(6) . . . . ?
C11 C12 C13 C8 -0.9(6) . . . . ?
C11 C12 C13 C1 176.1(4) . . . . ?
C9 C8 C13 C12 0.9(5) . . . . ?
C7 C8 C13 C12 177.7(3) . . . . ?
C9 C8 C13 C1 -176.7(3) . . . . ?
C7 C8 C13 C1 0.1(4) . . . . ?
C2 C1 C13 C12 -175.4(4) . . . . ?
C14 C1 C13 C12 67.9(5) . . . . ?
C2 C1 C13 C8 1.9(4) . . . . ?
C14 C1 C13 C8 -114.7(3) . . . . ?
C15 O1 C14 C1 175.6(3) . . . . ?
C2 C1 C14 O1 178.4(3) . . . . ?
C13 C1 C14 O1 -68.5(4) . . . . ?
C16 N1 C15 O2 5.2(6) . . . . ?
C16 N1 C15 O1 -175.5(3) . . . . ?
C14 O1 C15 O2 -4.8(5) . . . . ?
C14 O1 C15 N1 175.9(3) . . . . ?
C15 N1 C16 C17 -131.0(3) . . . . ?
C15 N1 C16 C18 106.7(4) . . . . ?
N1 C16 C17 O3 -14.7(7) . . . . ?
C18 C16 C17 O3 109.1(6) . . . . ?
N1 C16 C17 O4 165.7(4) . . . . ?
C18 C16 C17 O4 -70.5(5) . . . . ?
N1 C16 C18 C19 -68.5(4) . . . . ?
C17 C16 C18 C19 167.8(3) . . . . ?
C16 C18 C19 C24 -88.5(4) . . . . ?
C16 C18 C19 C20 90.5(4) . . . . ?
C24 C19 C20 C21 -0.4(5) . . . . ?
C18 C19 C20 C21 -179.4(3) . . . . ?
C19 C20 C21 F1 -177.4(3) . . . . ?
C19 C20 C21 C22 1.8(6) . . . . ?
F1 C21 C22 F2 -2.3(6) . . . . ?
C20 C21 C22 F2 178.5(3) . . . . ?
F1 C21 C22 C23 177.3(4) . . . . ?
C20 C21 C22 C23 -1.8(6) . . . . ?
F2 C22 C23 C24 -179.9(4) . . . . ?
C21 C22 C23 C24 0.5(6) . . . . ?
C22 C23 C24 C19 0.8(6) . . . . ?
C20 C19 C24 C23 -0.9(6) . . . . ?
C18 C19 C24 C23 178.2(3) . . . . ?
 
_refine_diff_density_max    1.416
_refine_diff_density_min   -0.381
_refine_diff_density_rms    0.073

_shelxl_version_number 2013-4

_shelx_res_file
;
TITL lihi2_a.res in P2(1)2(1)2(1)
REM Old TITL lihi2 in P2(1)2(1)2(1)
REM SHELXT solution in P2(1)2(1)2(1)
REM R1 0.165, Rweak 0.039, Alpha 0.002, Orientation as input
REM Flack x = -1.486 ( 0.077 ) from Parsons' quotients
REM Formula found by SHELXT: Cl26 N2 O5 F
CELL 1.54184 4.9826 13.0717 36.5189 90 90 90
ZERR 4 0.0001 0.0002 0.0005 0 0 0
LATT -1
SYMM 0.5-X,-Y,0.5+Z
SYMM -X,0.5+Y,0.5-Z
SYMM 0.5+X,0.5-Y,-Z
SFAC C H N O F  S
UNIT 104 100 4 20 8 4

L.S. 8 0 0
PLAN  12
BOND $H
list 4
fmap 2 53
omit 0 0 2
omit -2 3 6
omit 0 0 4
omit 1 0 3
omit 0 0 12
omit 2 3 6
sadi s1 c26 s1 c27 s1 c28 s1 c29
dang 2.8 0.02 c26 c27 c28 c29
MORE -1
rem moran lihi TAU
rem colorless needle
size 0.2 0.01 0.01
temp -173
isor 0.005 O3 O4
ACTA
CONF
REM <olex2.extras>
REM <HklSrc "%./lihi2.hkl">
REM </olex2.extras>

WGHT    0.088200    2.152200
FVAR       0.68200   0.81966   0.52786   0.56160
O1    4    0.715846    0.607626    0.612280    11.00000    0.01492    0.01282 =
         0.03140   -0.00474    0.00030    0.00060
O2    4    1.034673    0.730729    0.617980    11.00000    0.01195    0.02486 =
         0.06245   -0.01714   -0.00257    0.00157
O3    4    0.377650    0.842877    0.696457    11.00000    0.14346    0.05418 =
         0.05820   -0.02716    0.06264   -0.05854
O4    4    0.606937    0.981801    0.690491    11.00000    0.10530    0.04829 =
         0.05976   -0.03691    0.05205   -0.04297
AFIX 147
H4O   2    0.507593    1.003401    0.707390    11.00000   -1.50000
AFIX   0
F1    5    0.635030    0.799660    0.489730    11.00000    0.04289    0.04645 =
         0.03734   -0.00839   -0.00138   -0.00080
F2    5    1.050767    0.920984    0.478358    11.00000    0.04868    0.05621 =
         0.03798    0.01663    0.01732    0.01385
PART 0
N1    3    0.598364    0.760361    0.633394    11.00000    0.01540    0.01346 =
         0.02809   -0.00291    0.00143   -0.00067
AFIX  43
H1A   2    0.439222    0.732393    0.636392    11.00000   -1.20000
AFIX   0
C1    1    0.797494    0.436303    0.590873    11.00000    0.01683    0.01741 =
         0.02181   -0.00270   -0.00361    0.00122
AFIX  13
H1    2    0.632277    0.440167    0.575389    11.00000   -1.20000
AFIX   0
C2    1    1.006552    0.368409    0.573039    11.00000    0.01604    0.01396 =
         0.02395   -0.00388   -0.00397    0.00001
C3    1    1.131288    0.378684    0.539108    11.00000    0.02049    0.01832 =
         0.02227   -0.00083   -0.00370   -0.00144
AFIX  43
H3    2    1.082300    0.432402    0.522912    11.00000   -1.20000
AFIX   0
C4    1    1.329708    0.308418    0.529408    11.00000    0.01845    0.02299 =
         0.02477   -0.00703    0.00063   -0.00187
AFIX  43
H4    2    1.415963    0.314409    0.506307    11.00000   -1.20000
AFIX   0
C5    1    1.403351    0.229695    0.553016    11.00000    0.01871    0.01927 =
         0.03569   -0.00723   -0.00087    0.00021
AFIX  43
H5    2    1.540415    0.183097    0.546030    11.00000   -1.20000
AFIX   0
C6    1    1.277084    0.218845    0.586859    11.00000    0.02202    0.01626 =
         0.03314   -0.00155   -0.00411    0.00325
AFIX  43
H6    2    1.329105    0.165818    0.603171    11.00000   -1.20000
AFIX   0
C7    1    1.073095    0.287006    0.596445    11.00000    0.01821    0.01535 =
         0.02364   -0.00152   -0.00430   -0.00074
C8    1    0.904038    0.292544    0.628981    11.00000    0.01979    0.01930 =
         0.02521   -0.00003   -0.00542   -0.00029
C9    1    0.878302    0.225051    0.658486    11.00000    0.02726    0.02515 =
         0.03359    0.00606   -0.00335   -0.00260
AFIX  43
H9    2    0.989173    0.166145    0.660311    11.00000   -1.20000
AFIX   0
C10   1    0.686751    0.246214    0.685056    11.00000    0.03049    0.03762 =
         0.03181    0.01059    0.00044   -0.00346
AFIX  43
H10   2    0.664042    0.200591    0.705067    11.00000   -1.20000
AFIX   0
C11   1    0.528055    0.333284    0.682710    11.00000    0.02322    0.04696 =
         0.03105    0.00061    0.00536    0.00109
AFIX  43
H11   2    0.400424    0.346994    0.701402    11.00000   -1.20000
AFIX   0
C12   1    0.552955    0.401267    0.653243    11.00000    0.02139    0.03163 =
         0.02814   -0.00368   -0.00135    0.00254
AFIX  43
H12   2    0.443702    0.460684    0.651762    11.00000   -1.20000
AFIX   0
C13   1    0.740133    0.379891    0.626379    11.00000    0.01614    0.01901 =
         0.02333   -0.00116   -0.00369   -0.00055
C14   1    0.919116    0.542497    0.596168    11.00000    0.01490    0.01696 =
         0.02880   -0.00427   -0.00124    0.00606
AFIX  23
H14A  2    1.077387    0.538453    0.612493    11.00000   -1.20000
H14B  2    0.977430    0.570725    0.572303    11.00000   -1.20000
AFIX   0
C15   1    0.801784    0.703039    0.620983    11.00000    0.01371    0.01894 =
         0.02354   -0.00547   -0.00136   -0.00018
C16   1    0.635799    0.867313    0.641943    11.00000    0.01734    0.01408 =
         0.02180   -0.00293   -0.00026   -0.00103
AFIX  13
H16   2    0.832875    0.881764    0.642211    11.00000   -1.20000
AFIX   0
C17   1    0.522251    0.893929    0.679632    11.00000    0.02123    0.02074 =
         0.02320   -0.00273   -0.00113    0.00404
C18   1    0.504176    0.937259    0.612945    11.00000    0.02328    0.01903 =
         0.02461    0.00003   -0.00241    0.00548
AFIX  23
H18A  2    0.314364    0.916733    0.609746    11.00000   -1.20000
H18B  2    0.506442    1.008700    0.621939    11.00000   -1.20000
AFIX   0
C19   1    0.643346    0.932719    0.576518    11.00000    0.01995    0.01881 =
         0.02578    0.00423   -0.00426    0.00219
C20   1    0.565041    0.862418    0.549960    11.00000    0.02080    0.02396 =
         0.02763    0.00187   -0.00051    0.00238
AFIX  43
H20   2    0.420917    0.816465    0.554376    11.00000   -1.20000
AFIX   0
C21   1    0.702629    0.860935    0.516778    11.00000    0.03520    0.03363 =
         0.02409   -0.00046   -0.00462    0.01253
C22   1    0.917495    0.926087    0.510722    11.00000    0.03246    0.04665 =
         0.03190    0.02004    0.01306    0.01723
C23   1    0.996115    0.995264    0.536452    11.00000    0.02314    0.03683 =
         0.04225    0.01693    0.00168    0.00079
AFIX  43
H23   2    1.142691    1.040055    0.532011    11.00000   -1.20000
AFIX   0
C24   1    0.856336    0.998689    0.569414    11.00000    0.02655    0.02383 =
         0.03464    0.00928   -0.00469    0.00294
AFIX  43
H24   2    0.907468    1.047183    0.587490    11.00000   -1.20000
AFIX   0

rem DMSO

part 1
C26   1    0.004010    1.035222    0.794178    31.00000    0.03100    0.07579 =
         0.06211    0.03037    0.00015   -0.00122
AFIX 137
H26A  2   -0.014598    0.960735    0.792496    31.00000   -1.50000
H26B  2   -0.170470    1.065670    0.800063    31.00000   -1.50000
H26C  2    0.133331    1.052284    0.813453    31.00000   -1.50000
AFIX   0
C27   1    0.111024    1.222365    0.767324    31.00000    0.04920    0.04202 =
         0.05710   -0.00213    0.01263    0.01006
AFIX 137
H27A  2    0.253624    1.233449    0.785376    31.00000   -1.50000
H27B  2   -0.063644    1.236194    0.778625    31.00000   -1.50000
H27C  2    0.137588    1.268516    0.746489    31.00000   -1.50000
AFIX   0
part 2
C28   1    0.064947    1.152370    0.789243   -31.00000    0.04353    0.04956 =
         0.10757   -0.03448    0.01732    0.00609
AFIX 137
H28A  2    0.113602    1.110973    0.810609   -31.00000   -1.50000
H28B  2   -0.125553    1.170623    0.790615   -31.00000   -1.50000
H28C  2    0.173698    1.214831    0.788904   -31.00000   -1.50000
AFIX   0
C29   1   -0.031305    0.961980    0.763260   -31.00000    0.03474    0.04182 =
         0.04290    0.00601    0.00230    0.00074
AFIX 137
H29A  2   -0.021940    0.915269    0.742308   -31.00000   -1.50000
H29B  2   -0.219437    0.972786    0.770065   -31.00000   -1.50000
H29C  2    0.065820    0.932229    0.784024   -31.00000   -1.50000
AFIX   0
part 0
S1    6    0.121660    1.084993    0.750861    11.00000    0.03651    0.05374 =
         0.03151    0.01051   -0.00919   -0.01017
O6    4    0.417693    1.058958    0.750213    11.00000    0.04149    0.04972 =
         0.03797   -0.01639    0.01256   -0.01030
HKLF 4

REM  lihi2_a.res in P2(1)2(1)2(1)
REM R1 =  0.0550 for    4634 Fo > 4sig(Fo)  and  0.0568 for all    4854 data
REM    342 parameters refined using     20 restraints

END

WGHT      0.0881      2.1451

REM Highest difference peak  1.416,  deepest hole -0.381,  1-sigma level  0.073
Q1    1   1.1834  1.0247  0.5194  11.00000  0.05    1.42
Q2    1   0.2461  1.0871  0.7799  11.00000  0.05    0.80
Q3    1   0.9432  0.8798  0.4629  11.00000  0.05    0.41
Q4    1   0.4922  0.8408  0.7032  11.00000  0.05    0.35
Q5    1   0.8228  0.8791  0.4991  11.00000  0.05    0.29
Q6    1   0.4780  0.9829  0.6783  11.00000  0.05    0.27
Q7    1   0.3081  0.8635  0.6832  11.00000  0.05    0.27
Q8    1   0.0642  1.1383  0.7797  11.00000  0.05    0.24
Q9    1   1.2175  1.0977  0.5219  11.00000  0.05    0.23
Q10   1   0.6508  0.9575  0.6987  11.00000  0.05    0.23
Q11   1   1.0829  0.4677  0.4822  11.00000  0.05    0.23
Q12   1   0.0467  1.0817  0.7194  11.00000  0.05    0.22
;
_shelx_res_checksum   38280

_shelx_hkl_file
;
   0   0  -2    0.07    0.35
   0   0  -3   -0.07    1.26
   0   0  -4  215.34    8.68
   0   0  -5    0.67    1.99
   0   0  -6  946.53   33.68
   0   0  -7   -0.76    2.57
   0   0  -8 5864.27  197.93
   0   0  -9    3.14    2.96
   0   0 -10  325.33   14.07
   0   0 -11   -0.33    2.72
   0   0 -11    1.06    3.67
   0   0 -12   16.59    4.48
   0   0 -12   11.52    3.48
   0   0 -13   -0.26    3.94
   0   0 -13    0.19    2.57
   0   0 -14 5375.09  178.66
   0   0 -14 5031.63  180.18
   0   0 -15   -0.34    2.36
   0   0  15    1.44    3.80
   0   0 -15    0.33    3.98
   0   0 -16 4982.32  172.67
   0   0 -16 4825.49  170.14
   0   0  16 5157.13  174.88
   0   0 -17    1.42    3.83
   0   0  17    3.67    4.32
   0   0 -17    1.18    2.57
   0   0 -18 4714.09  171.62
   0   0  18 4805.51  173.40
   0   0 -18 5024.71  168.62
   0   0 -19    0.76    2.39
   0   0 -19    6.12    4.29
   0   0  19   -1.14    3.58
   0   0 -20  123.87   11.24
   0   0 -20  119.97    8.74
   0   0  20  100.55   10.62
   0   0 -21    0.70    2.10
   0   0  21    2.27    3.94
   0   0 -21    2.97    3.81
   0   0 -22  972.86   43.99
   0   0  22  954.75   34.24
   0   0  23   -0.06    1.66
   0   0 -23    0.45    1.46
   0   0 -24  225.78   10.00
   0   0  24  228.44   10.10
   0   0 -25   -1.18    1.75
   0   0  25    0.83    2.02
   0   0 -26  115.30    6.29
   0   0  26  113.96    6.56
   0   0  27   -0.85    2.18
   0   0 -27    0.20    1.80
   0   0 -28   20.47    2.89
   0   0  28   17.59    3.22
   0   0 -29    1.70    2.16
   0   0  29    1.15    2.78
   0   0 -30 1566.45   55.29
   0   0 -31    1.55    2.14
   0   0 -32  414.35   16.86
   0   0 -33   -0.07    2.31
   0   0 -34  507.39   19.91
   0   0 -35    0.85    2.27
   0   0 -36   15.03    2.92
   0   0  37    2.68    3.54
   0   0  38  173.49    9.20
   0   0  39   -0.51    3.20
   0   0  40   55.77    4.66
   0   0  41   -0.41    2.60
   0   0  42   94.25    5.30
   0   0  43    0.69    1.63
   0   0  44  202.89    8.05
   0  -1   0    2.29    1.55
   0  -1  -1  319.78   11.63
   0  -1   1  313.29   12.33
   0  -1  -1  322.34   11.41
   0  -1  -2  155.53    6.52
   0  -1   2  166.96    7.57
   0  -1  -2  170.63    6.41
   0  -1   3    9.60    2.91
   0   1  -3    9.67    2.50
   0  -1  -3   14.13    1.60
   0  -1  -4  124.80    5.51
   0   1  -4  120.25    6.84
   0  -1   4  138.18    6.88
   0  -1   5  735.93   26.31
   0  -1  -5  716.69   25.22
   0   1  -5  674.81   26.38
   0  -1   6 1954.41   66.74
   0   1  -6 1773.52   66.06
   0  -1   6 1877.42   66.13
   0  -1  -6 1968.17   65.08
   0  -1  -7 2431.80   82.11
   0  -1   7 2425.57   83.91
   0  -1   7 2466.66   83.23
   0   1  -7 2284.38   83.14
   0  -1   8  894.62   33.31
   0   1  -8  828.34   33.17
   0  -1   8  890.10   34.53
   0  -1  -8  966.18   32.54
   0  -1   9 9327.40  292.66
   0  -1  -9 8604.87  290.12
   0  -1   9 8924.28  291.17
   0  -1  10 2316.06   78.06
   0  -1  10 2370.68   79.86
   0  -1 -10 2234.54   77.60
   0  -1 -10 2188.52   77.12
   0   1 -10 2075.35   77.78
   0  -1 -11  384.57   15.89
   0  -1 -11  453.70   15.50
   0  -1 -12   33.73    3.83
   0  -1 -12   34.51    4.52
   0  -1 -13  495.53   20.75
   0  -1  13  480.61   22.55
   0   1  13  467.18   21.65
   0  -1 -13  466.11   19.74
   0  -1 -14 1509.57   52.98
   0   1 -14 1458.53   54.85
   0  -1 -14 1407.60   51.43
   0   1  14 1283.80   53.77
   0  -1  14 1426.31   54.77
   0  -1 -15 1927.04   67.48
   0   1 -15 1902.96   69.57
   0  -1  15 1900.97   69.83
   0  -1 -15 1855.93   65.85
   0  -1 -16  121.99    7.84
   0  -1 -16  122.08    9.09
   0  -1  16  102.08    9.87
   0   1  16  108.24    9.91
   0   1 -16  116.01   10.10
   0   1 -17 1158.56   47.22
   0  -1  17 1125.51   46.86
   0  -1 -17 1128.02   42.95
   0  -1 -17 1115.58   44.79
   0  -1 -18  246.73   14.71
   0   1 -18  239.72   16.18
   0  -1  18  241.16   16.05
   0  -1 -18  249.54   13.08
   0  -1 -19   13.56    4.25
   0  -1 -19   15.67    3.53
   0   1 -19   15.49    5.16
   0  -1 -20   12.87    4.53
   0   1 -20   15.85    5.51
   0  -1 -20   17.74    3.66
   0  -1 -21  263.35   16.84
   0  -1 -21  249.90   14.47
   0   1 -21  269.99   18.62
   0  -1 -22  123.83   11.46
   0   1 -22  131.88   12.97
   0   1  22  128.93    6.48
   0  -1 -23  387.06   24.48
   0  -1 -23  446.76   17.46
   0   1 -23  443.83   17.19
   0  -1  23  451.06   17.24
   0   1  23  466.70   17.51
   0  -1 -24   11.42    2.28
   0   1  24   14.97    2.64
   0   1 -24   10.11    2.01
   0  -1  24   13.49    2.34
   0  -1  25    4.90    2.06
   0  -1 -25    4.87    1.98
   0   1  25    1.88    2.10
   0   1 -25    3.75    1.83
   0   1 -26   47.07    3.83
   0  -1 -26   52.67    4.10
   0  -1  26   45.88    3.79
   0   1  26   53.52    4.28
   0   1 -27    6.15    2.05
   0   1  27    5.70    2.77
   0  -1 -27    7.11    2.37
   0  -1 -28  309.68   13.48
   0   1 -28  311.20   13.34
   0   1  28  327.71   13.86
   0   1 -29    2.07    2.09
   0   1  29    1.12    2.50
   0  -1 -29    1.05    2.25
   0   1 -30  162.52    8.23
   0  -1 -30  170.07    8.59
   0   1  30  165.30    8.93
   0   1 -31  646.81   25.03
   0  -1 -31  672.89   25.48
   0   1  31  673.95   25.75
   0  -1 -32  122.39    6.88
   0   1 -32  104.80    6.45
   0   1 -33  360.05   15.40
   0  -1 -33  394.17   15.80
   0  -1 -34  181.84    8.94
   0   1 -34  170.20    8.51
   0  -1 -35  132.56    7.28
   0  -1  36    1.76    3.37
   0  -1 -36    0.70    2.26
   0  -1  37   10.34    3.32
   0  -1 -37    8.01    2.61
   0  -1  38   45.81    4.51
   0  -1 -38   44.19    3.80
   0  -1  39  208.49   10.06
   0   1  39  231.47   10.87
   0   1  40    4.24    3.37
   0  -1  40    5.27    2.48
   0   1  41   10.76    3.23
   0  -1  41    7.84    2.37
   0   1  42    2.92    2.61
   0  -1  42    4.82    1.79
   0   1  43   -0.05    2.18
   0   1  44   10.15    1.82
   0   1  45   -0.82    0.98
   0   2   0   69.66    4.90
   0   2   1  816.05   28.90
   0  -2  -1  807.07   28.39
   0   2  -1  791.77   29.59
   0  -2   2  274.74   12.95
   0   2   2  278.64   11.46
   0  -2  -2  297.96   11.21
   0  -2   3 7285.70  249.82
   0  -2  -3 7282.64  247.73
   0   2   3 7556.50  247.94
   0  -2  -4 5610.50  192.80
   0  -2   4 5993.01  194.91
   0  -2   5 2490.64   82.90
   0  -2  -5 2413.37   80.83
   0  -2  -5 2246.04   80.86
   0  -2   6 3964.18  134.65
   0  -2  -6 3891.60  132.65
   0  -2  -7 9999.00  335.21
   0  -2   7 9983.68  337.18
   0  -2   8  158.82    9.87
   0  -2  -8  179.50    8.45
   0  -2  -9 1736.42   61.60
   0  -2   9 1808.41   63.54
   0  -2 -10   86.09    5.74
   0  -2  10   98.19    7.39
   0  -2 -11  128.98    7.28
   0  -2  11  132.00    9.04
   0  -2  12 2874.72   96.47
   0  -2 -12 2828.24   94.65
   0  -2 -13 2369.30   81.49
   0   2 -13 2322.11   82.77
   0  -2  13 2248.22   83.14
   0  -2 -14  846.46   32.03
   0  -2 -14  819.20   32.55
   0   2 -14  799.90   33.08
   0  -2  14  847.53   33.67
   0  -2 -15  596.38   24.35
   0   2 -15  614.60   24.90
   0  -2 -15  586.42   23.62
   0   2  16   40.60    6.11
   0  -2 -16   44.98    4.78
   0   2 -16   39.02    5.13
   0  -2 -16   43.85    5.51
   0   2 -16   30.36    6.79
   0   2  17   36.74    6.25
   0  -2 -17   28.32    4.63
   0   2 -17   33.28    4.84
   0   2 -17   30.96    6.94
   0  -2 -17   32.15    4.23
   0  -2 -18 1099.82   42.74
   0   2 -18 1102.48   48.30
   0  -2 -18 1087.25   44.17
   0   2 -18 1112.21   43.39
   0   2  18 1118.56   46.94
   0   2  19    3.38    4.42
   0  -2 -19    4.02    2.99
   0  -2 -19    4.61    2.55
   0   2 -19    7.47    4.27
   0   2 -19    6.46    2.87
   0  -2 -20  296.67   17.28
   0   2  20  309.77   19.86
   0   2 -20  295.11   15.98
   0   2 -20  300.19   20.47
   0   2 -21 2079.52   80.56
   0   2 -21 1897.31   72.64
   0   2  21 2009.05   67.73
   0  -2 -22 1290.42   55.97
   0  -2 -22 1394.65   49.00
   0   2  22 1407.80   48.91
   0  -2 -23  969.53   43.82
   0  -2 -23  955.79   35.80
   0   2  23 1035.69   35.92
   0  -2 -24   21.09    2.89
   0   2  24   19.35    2.89
   0  -2 -25  428.09   17.56
   0   2  25  452.36   17.70
   0   2  26   10.72    2.77
   0  -2 -26    5.97    2.47
   0  -2 -27  446.80   18.72
   0   2  27  498.48   19.11
   0  -2 -28  809.62   30.56
   0   2  28  828.93   30.83
   0  -2 -29   77.76    5.44
   0   2  29   75.90    5.82
   0  -2 -30   74.24    5.39
   0   2  30   69.44    5.82
   0  -2 -31  489.05   19.72
   0   2  31  491.19   20.15
   0  -2 -32   -0.41    2.51
   0   2  32    2.12    3.46
   0  -2  33   19.58    3.55
   0  -2 -33   18.16    3.31
   0  -2  34   98.66    6.40
   0  -2 -34   95.57    6.24
   0  -2 -35  258.61   11.75
   0  -2  35  256.41   11.85
   0  -2 -36   27.64    3.52
   0  -2  36   29.05    3.79
   0  -2  37  364.36   15.10
   0  -2 -37  366.60   15.04
   0  -2  38  250.91   11.21
   0  -2 -38  264.02   11.21
   0  -2  39   24.82    3.08
   0  -2 -39   27.31    3.06
   0   2  40   31.36    4.47
   0  -2 -40   25.41    2.72
   0   2  41   14.61    3.64
   0   2  42   -1.33    2.68
   0   2  43   78.79    4.80
   0   2  44   33.08    2.74
   0   2  45   30.28    2.15
   0   3   0    9.14    3.67
   0   3   0   -1.95    2.89
   0   3  -1 4711.07  155.51
   0  -3  -1 4112.59  156.71
   0   3   1 4623.32  156.24
   0   3  -1 4613.90  156.89
   0   3   1 4756.79  155.26
   0   3   2 2145.09   74.08
   0   3   2 2266.08   75.08
   0  -3  -2 2157.17   75.55
   0   3  -2 2196.94   76.34
   0  -3  -2 2093.82   74.52
   0   3  -3    6.83    4.85
   0   3   3    5.13    2.11
   0  -3  -3    3.16    3.18
   0  -3  -3    4.91    2.63
   0   3   3    3.10    3.27
   0   3   4  823.41   28.48
   0  -3  -4  824.17   29.68
   0   3  -4  725.90   31.28
   0  -3  -4  760.33   28.88
   0   3  -5  971.80   36.11
   0  -3  -5  960.26   33.79
   0   3   5  972.85   32.74
   0  -3  -5  852.14   33.21
   0   3  -6    0.30    3.41
   0  -3  -6    0.30    3.04
   0   3   6    0.77    1.90
   0  -3  -6    1.76    2.28
   0  -3   6    2.01    5.09
   0  -3  -7  681.17   27.91
   0   3   7  772.74   27.68
   0   3  -7  797.45   29.98
   0  -3   7  729.49   30.60
   0  -3  -7  789.90   28.56
   0  -3  -8   23.46    3.48
   0  -3   8   21.56    5.66
   0   3   8   23.16    3.03
   0  -3  -8   23.53    3.88
   0   3  -8   24.16    4.94
   0   3   9  162.50    8.56
   0  -3  -9  171.34    9.07
   0  -3   9  160.97   10.75
   0  -3  -9  169.66    8.86
   0   3  -9  166.26   10.48
   0   3 -10 1134.88   44.36
   0  -3 -10 1188.48   42.54
   0   3  10 1157.78   42.49
   0  -3  10 1112.79   44.67
   0  -3 -10 1173.37   42.66
   0   3 -11 3420.07  116.89
   0   3  11 3296.89  115.35
   0  -3 -11 3398.71  115.22
   0  -3 -11 3318.10  114.97
   0  -3  11 3174.81  117.33
   0   3  12 1037.12   38.82
   0  -3 -12  996.02   38.07
   0   3 -12 1041.04   39.88
   0   3 -12  971.20   42.64
   0  -3  12 1014.78   40.61
   0  -3 -13  743.55   29.75
   0   3 -13  750.81   31.05
   0   3 -13  737.36   34.51
   0   3  13  789.98   31.04
   0  -3  13  751.76   31.75
   0   3 -14  362.31   16.95
   0   3 -14  271.14   18.28
   0  -3  14  285.89   16.55
   0   3  14  327.32   16.49
   0  -3 -14  326.84   15.21
   0   3 -15  364.04   18.00
   0  -3 -15  375.31   17.04
   0   3  15  365.02   18.51
   0  -3  15  324.36   17.99
   0  -3  16    8.88    3.77
   0   3 -16   11.16    3.43
   0   3  16   13.34    3.99
   0  -3 -16   13.91    3.21
   0  -3 -16   11.07    3.33
   0  -3 -17   25.25    4.34
   0  -3 -17   24.95    4.10
   0   3  17   28.79    5.29
   0   3 -17   23.80    4.28
   0  -3 -18 1820.63   69.94
   0   3 -18 1720.38   75.36
   0   3  18 1964.83   73.71
   0  -3 -18 1928.87   70.01
   0   3 -18 1972.51   70.56
   0  -3 -19   12.23    3.21
   0   3  19   10.68    4.42
   0  -3 -19    9.91    3.31
   0   3 -19   12.63    3.50
   0   3 -19    8.36    5.06
   0   3 -20   29.43    6.98
   0   3 -20   29.03    4.70
   0  -3 -20   30.04    5.04
   0  -3 -20   32.60    4.85
   0   3  20   34.28    6.56
   0  -3 -21   18.49    4.28
   0   3  21   16.84    2.44
   0  -3 -21   15.32    2.74
   0  -3 -22  798.24   38.09
   0  -3 -22  900.27   32.68
   0   3  22  897.31   32.26
   0  -3 -23  564.66   21.47
   0   3  23  536.02   21.11
   0  -3 -24  503.94   20.01
   0   3  24  502.78   19.72
   0  -3 -25  570.94   22.29
   0   3  25  566.75   22.09
   0  -3 -26  157.54    8.26
   0   3  26  152.14    8.31
   0   3  27    0.24    2.78
   0  -3 -27    0.58    2.33
   0  -3 -28  217.08   10.73
   0   3  28  231.33   10.96
   0  -3 -29   34.71    4.07
   0   3  29   33.23    4.49
   0  -3 -30   37.39    4.26
   0   3  30   27.08    4.44
   0  -3 -31  301.46   13.38
   0   3  31  284.35   13.69
   0  -3 -32  154.41    8.46
   0   3  32  136.96    8.72
   0  -3 -33    5.73    3.04
   0   3  33    8.62    4.29
   0  -3 -34  560.69   22.16
   0  -3 -35    7.22    3.06
   0  -3 -36    3.40    2.66
   0  -3 -37  260.26   11.56
   0  -3 -38    1.14    2.32
   0  -3 -39    3.44    2.15
   0   3  40   11.54    4.11
   0  -3 -40   10.22    2.08
   0   3  41    9.23    3.55
   0   3  42   19.92    3.39
   0   3  43   16.83    2.64
   0   3  44    8.07    2.00
   0   3  45    3.97    1.16
   0  -4   0    2.73    4.60
   0   4   0    0.70    2.31
   0   4   0    3.57    3.55
   0   4  -1  412.85   18.52
   0   4  -1  428.93   16.91
   0  -4  -1  440.41   19.48
   0   4   1  418.94   16.59
   0   4   1  403.86   17.81
   0  -4   1  408.27   19.76
   0   4  -2    4.95    4.35
   0  -4  -2    3.56    4.77
   0   4  -2    0.52    2.83
   0   4   2    2.23    2.39
   0   4   2    3.11    2.98
   0  -4   2    4.15    5.11
   0  -4  -3 2737.97   93.20
   0   4   3 2743.25   90.98
   0   4   3 2692.70   92.00
   0   4  -3 2776.84   93.96
   0  -4  -3 2613.55   91.37
   0  -4  -4 1008.86   38.06
   0   4   4 1006.08   35.86
   0   4   4 1005.18   36.93
   0  -4  -4 1009.44   36.78
   0   4  -4  948.60   39.21
   0   4   5 2144.66   73.51
   0   4  -5 2152.65   77.84
   0  -4  -5 2106.49   75.43
   0  -4  -5 2107.09   74.42
   0  -4  -6  271.90   13.19
   0   4   6  275.60   11.78
   0  -4  -6  271.79   12.50
   0   4  -6  276.94   15.58
   0  -4  -7  120.70    7.48
   0   4  -7  118.59    8.82
   0  -4  -7  132.62    8.06
   0   4   7  125.24    6.83
   0   4  -7  115.61   10.16
   0  -4  -8   91.39    7.00
   0   4  -8   93.75    9.04
   0  -4  -8   96.44    6.63
   0   4   8   96.76    6.00
   0   4  -8   87.41    7.89
   0  -4   9 1560.17   64.88
   0  -4  -9 1765.27   63.05
   0   4   9 1803.15   62.02
   0  -4  -9 1777.35   62.67
   0   4  -9 1847.14   64.95
   0   4  -9 1650.12   66.74
   0  -4 -10  526.17   22.04
   0   4 -10  520.67   25.60
   0   4  10  531.79   21.23
   0  -4 -10  491.38   21.29
   0  -4  10  500.74   24.05
   0   4 -10  543.61   23.74
   0  -4 -11   13.34    3.66
   0  -4 -11    9.36    3.28
   0   4  11   14.03    3.32
   0  -4  11   12.87    4.66
   0   4 -11   12.71    5.05
   0   4 -11   10.43    4.11
   0  -4 -12   53.67    5.48
   0   4 -12   49.68    7.36
   0  -4 -12   52.66    5.42
   0   4  12   58.13    5.54
   0   4 -12   54.00    6.16
   0  -4  12   51.86    6.80
   0   4 -13 1059.64   45.76
   0  -4 -13 1065.11   40.79
   0  -4  13 1009.37   43.10
   0   4  13 1057.32   41.11
   0  -4 -13 1033.96   40.51
   0   4 -13 1125.46   42.47
   0  -4 -14   98.56    7.53
   0   4 -14   87.69   10.56
   0  -4  14   98.83    9.16
   0   4  14  106.22    8.32
   0  -4 -14   92.12    7.33
   0   4 -14  102.02    8.46
   0   4 -15 1291.85   57.46
   0   4 -15 1441.69   53.65
   0  -4  15 1326.75   54.39
   0  -4 -15 1349.04   51.89
   0  -4 -15 1396.33   52.18
   0   4  15 1413.34   53.61
   0  -4  16    5.35    3.48
   0   4  16    3.90    2.97
   0   4 -16    6.93    3.27
   0   4 -16    4.96    5.04
   0  -4 -16    5.20    2.80
   0  -4 -16    3.90    2.28
   0   4  17  932.40   39.27
   0  -4 -17  866.99   36.84
   0  -4  17  849.55   38.67
   0  -4 -17  924.82   37.00
   0   4 -17  967.00   38.06
   0  -4 -18   96.00    8.27
   0   4  18  107.82   10.02
   0  -4  18  104.26    9.68
   0  -4 -18  104.42    8.24
   0   4 -18  110.09    8.87
   0  -4 -18   88.38    7.66
   0   4 -19 2304.13   80.36
   0   4  19 2383.60   84.46
   0  -4 -19 2019.17   78.94
   0  -4 -19 2262.69   80.30
   0  -4 -19 2098.81   79.22
   0  -4 -19 2075.00   74.92
   0  -4 -20  102.14    8.71
   0  -4 -20  101.87    8.48
   0  -4 -20   87.65    6.02
   0   4  20   98.30    5.66
   0  -4 -21  139.96   10.30
   0  -4 -21  130.11   10.30
   0  -4 -21  124.03    7.31
   0   4  21  124.66    6.78
   0  -4 -22  513.55   20.58
   0  -4 -23  236.88   11.29
   0  -4 -24    0.35    2.60
   0  -4 -25  157.34    8.58
   0  -4 -26   27.69    4.03
   0  -4 -27 2548.00   87.72
   0   4  27 2486.66   87.30
   0  -4 -28  437.03   18.29
   0   4  28  439.05   18.28
   0  -4 -29   58.97    5.39
   0   4  29   50.78    5.36
   0  -4 -30  381.70   16.40
   0   4  30  380.83   16.45
   0  -4 -31  207.05   10.62
   0   4  31  202.53   10.75
   0  -4 -32  150.11    8.54
   0   4  32  147.74    8.94
   0  -4 -33  150.61    8.50
   0   4  33  153.25    9.02
   0  -4 -34   28.63    4.15
   0  -4 -35  613.36   23.82
   0  -4 -36   22.22    3.55
   0  -4 -37    1.36    2.60
   0  -4 -38   56.12    4.33
   0  -4 -39  313.62   12.79
   0  -4 -40  132.53    6.39
   0  -4 -41   64.40    3.80
   0   4  41   75.14    5.27
   0   4  42   15.36    2.90
   0   4  43   54.77    3.73
   0   4  44    6.50    1.59
   0   4  45   40.55    2.22
   0   5   0    0.16    2.11
   0  -5   0    0.73    5.03
   0   5   0    1.42    3.39
   0   5   1  325.41   13.95
   0   5  -1  314.73   16.17
   0  -5   1  334.47   18.00
   0   5  -1  338.72   14.38
   0   5   1  335.42   15.88
   0  -5  -1  330.72   17.61
   0   5   2  410.98   18.67
   0  -5  -2  408.01   20.32
   0  -5   2  421.85   21.38
   0   5  -2  422.92   17.55
   0   5   2  427.60   17.04
   0   5  -2  406.25   19.64
   0  -5  -3    1.99    4.28
   0   5  -3    2.99    3.03
   0   5  -3    4.26    4.31
   0   5   3   -0.11    3.11
   0   5   3    2.46    2.10
   0  -5   3    1.63    4.72
   0  -5   4  365.66   19.73
   0   5   4  351.41   16.59
   0  -5  -4  368.11   18.45
   0   5  -4  379.18   16.51
   0   5   4  382.94   15.40
   0   5  -4  365.31   18.65
   0  -5  -5  699.76   29.17
   0  -5  -5  782.98   31.46
   0  -5   5  761.26   33.35
   0   5  -5  758.61   32.20
   0   5   5  770.33   28.19
   0   5  -6  760.99   33.99
   0   5   6  811.32   29.84
   0  -5  -6  793.93   32.49
   0  -5  -6  802.62   31.32
   0  -5   6  794.79   34.88
   0  -5   7  231.97   16.17
   0  -5  -7  279.84   14.70
   0   5   7  282.99   12.57
   0   5  -7  287.04   14.95
   0  -5  -7  285.95   13.85
   0   5  -7  296.16   16.95
   0   5   8  104.82    6.59
   0  -5  -8  104.63    8.15
   0   5  -8   99.01   10.30
   0   5  -8  108.17    8.71
   0  -5  -8  116.38    7.78
   0   5   9 1133.28   42.26
   0   5  -9 1158.35   48.20
   0   5  -9 1220.45   45.65
   0  -5  -9 1128.71   43.49
   0  -5  -9 1136.21   44.12
   0   5 -10  707.05   29.80
   0   5  10  680.70   26.96
   0  -5 -10  640.24   27.59
   0   5 -10  656.27   32.45
   0  -5 -10  704.99   28.62
   0  -5 -11    7.25    3.03
   0  -5 -11    7.02    3.19
   0   5  11    4.75    2.54
   0   5 -11    8.26    4.83
   0   5 -11    5.59    3.47
   0   5 -12  234.28   13.78
   0   5 -12  225.65   16.18
   0   5  12  229.46   12.36
   0  -5 -12  209.27   12.45
   0  -5 -12  230.58   12.61
   0  -5 -13  238.58   13.19
   0   5  13  230.84   13.03
   0  -5 -13  230.58   13.16
   0   5 -13  263.22   14.59
   0  -5  13  207.94   14.76
   0   5 -13  236.35   16.97
   0  -5 -14   59.47    6.20
   0   5  14   66.04    6.41
   0   5 -14   49.84    8.02
   0  -5  14   56.98    7.42
   0   5 -14   56.43    6.39
   0  -5 -14   61.70    6.17
   0  -5  15  116.67   10.53
   0  -5 -15  108.57    8.75
   0   5 -15  116.07    9.34
   0   5 -15  117.73   12.01
   0   5  15  115.66    9.32
   0  -5 -15  129.03    9.14
   0  -5 -16    0.19    2.09
   0   5 -16    1.82    3.69
   0  -5 -16    0.36    1.88
   0   5 -16    0.21    2.18
   0   5  16    2.41    2.76
   0  -5  16    1.84    3.38
   0  -5 -17  239.40   14.56
   0   5  17  252.09   15.92
   0  -5 -17  226.70   14.02
   0   5 -17  251.22   14.93
   0  -5 -17  265.62   11.87
   0  -5 -18  626.84   30.34
   0  -5 -18  649.24   30.15
   0   5  18  700.17   32.97
   0   5 -18  688.07   31.02
   0  -5 -18  758.49   27.12
   0  -5 -19  305.75   17.89
   0  -5 -19  308.99   17.51
   0  -5 -19  333.61   13.81
   0   5  19  365.64   14.37
   0  -5 -20   22.20    2.52
   0   5  20   22.66    2.94
   0  -5 -20   19.57    3.59
   0  -5 -21  796.82   30.20
   0   5  21  872.69   30.93
   0  -5 -21  852.26   31.92
   0   5  22   21.83    3.21
   0  -5 -22   18.73    3.72
   0  -5 -23    4.95    3.06
   0   5  23    4.14    2.58
   0  -5 -24  964.30   36.34
   0   5  24  966.17   35.56
   0  -5 -25   99.11    6.82
   0   5  25   89.22    6.28
   0  -5 -26   38.25    4.63
   0   5  26   29.64    4.22
   0  -5 -27  183.02   10.08
   0  -5 -28   -0.19    3.16
   0  -5 -29  183.98   10.01
   0  -5 -30   65.56    5.89
   0  -5 -31   37.46    4.80
   0  -5 -32    3.92    3.48
   0  -5 -33   25.82    4.35
   0  -5 -34   12.02    3.64
   0  -5 -35   37.78    4.34
   0  -5 -36   98.25    6.22
   0  -5 -37    9.85    2.91
   0  -5 -38   21.07    3.15
   0  -5 -39   12.70    2.49
   0   5  40   32.24    4.18
   0  -5 -40   30.25    2.81
   0   5  41    0.37    2.71
   0  -5 -41   -0.17    1.31
   0   5  42   51.75    3.72
   0   5  43    5.26    1.81
   0   5  44  147.32    5.98
   0  -6   0 4366.38  157.35
   0   6   0 4422.16  151.47
   0   6   0 4496.30  154.56
   0   6  -1 1454.48   50.82
   0  -6   1 1364.84   56.07
   0   6   1 1418.52   50.42
   0   6   1 1362.42   52.89
   0  -6  -1 1324.83   55.27
   0   6  -1 1396.24   53.53
   0   6   2  258.75   11.58
   0   6   2  225.88   13.04
   0  -6  -2  241.98   15.34
   0   6  -2  241.85   11.69
   0  -6   2  244.04   15.99
   0   6  -2  214.10   13.83
   0   6   3  243.14   13.50
   0  -6   3  256.42   16.51
   0   6   3  259.92   11.83
   0  -6  -3  247.16   15.52
   0   6  -3  248.91   14.66
   0   6  -3  266.06   12.68
   0   6   4  326.82   13.97
   0  -6   4  293.98   18.82
   0   6  -4  317.62   15.02
   0   6   4  325.48   15.91
   0   6  -4  322.87   17.51
   0  -6  -4  309.65   17.71
   0  -6  -5   92.00    8.96
   0   6  -5   89.88    8.82
   0   6   5   91.90    6.05
   0  -6   5   83.15    9.57
   0   6  -5  100.21    7.31
   0   6   6 1594.21   58.02
   0   6  -6 1589.28   63.24
   0   6  -6 1683.48   60.11
   0  -6   6 1650.90   64.96
   0  -6  -6 1640.83   62.88
   0  -6   7  614.31   29.71
   0  -6  -7  616.76   27.68
   0   6  -7  595.50   28.70
   0   6  -7  603.37   26.55
   0  -6  -7  576.49   25.27
   0   6   7  601.99   23.84
   0   6   8 5311.19  179.93
   0  -6  -8 5305.26  181.81
   0   6  -8 5388.76  186.20
   0  -6   8 5267.06  186.77
   0  -6  -8 5425.50  183.99
   0   6  -8 4929.28  183.08
   0   6   9  584.85   24.68
   0  -6  -9  648.42   26.72
   0   6  -9  635.52   27.99
   0  -6   9  615.50   30.30
   0  -6  -9  604.79   27.65
   0   6  -9  609.60   30.11
   0   6  10  639.34   26.19
   0   6 -10  674.37   29.14
   0  -6 -10  643.63   27.58
   0  -6 -10  614.07   28.37
   0  -6  10  631.89   31.11
   0   6 -10  637.64   31.66
   0  -6 -11  272.14   15.49
   0   6 -11  272.55   18.41
   0  -6  11  237.82   16.91
   0   6  11  283.63   14.22
   0   6 -11  284.55   16.12
   0  -6 -11  286.34   15.15
   0  -6 -12 1455.82   56.39
   0   6 -12 1403.17   61.29
   0  -6  12 1393.78   59.57
   0   6  12 1514.88   55.52
   0  -6 -12 1477.26   57.05
   0   6 -12 1558.61   57.99
   0   6 -13   -0.35    3.34
   0   6  13    2.84    2.36
   0  -6 -13    0.74    2.14
   0  -6 -13    3.98    2.42
   0   6 -13    1.68    2.38
   0   6  14  794.98   32.52
   0  -6 -14  773.86   32.57
   0   6 -14  836.40   33.68
   0  -6 -14  801.45   33.09
   0   6 -15    9.77    3.17
   0   6  15   10.50    3.25
   0  -6 -15   10.00    3.26
   0  -6 -15   10.78    3.30
   0  -6 -15    8.00    1.98
   0  -6 -15    6.67    2.91
   0   6 -16  287.47   15.94
   0   6  16  273.55   15.99
   0  -6 -16  231.94   14.50
   0  -6 -16  247.11   10.28
   0  -6 -16  195.54   11.29
   0  -6 -17  143.15    7.26
   0  -6 -17  173.06    9.04
   0  -6 -18   63.26    4.18
   0  -6 -18   45.07    5.03
   0  -6 -19   38.36    3.42
   0  -6 -19   47.51    4.95
   0   6  19   43.14    3.76
   0  -6 -20  100.86    5.62
   0   6  20   99.87    5.88
   0  -6 -20   77.86    6.42
   0  -6 -21   78.88    5.01
   0  -6 -21   88.28    6.66
   0   6  21   81.45    5.54
   0  -6 -22  418.13   16.82
   0  -6 -22  406.95   18.37
   0   6  22  447.99   17.40
   0  -6 -23   43.46    3.76
   0  -6 -23   50.92    5.37
   0   6  23   49.41    4.54
   0  -6 -24  308.31   13.26
   0   6  24  336.21   14.05
   0  -6 -24  309.66   14.93
   0  -6 -25  391.67   17.86
   0   6  25  422.12   17.12
   0  -6 -26  329.24   15.44
   0   6  26  340.09   14.76
   0  -6 -27  274.39   13.39
   0   6  27  268.88   12.64
   0  -6 -28   47.07    5.66
   0   6  28   60.60    5.47
   0  -6 -29  210.50   11.07
   0   6  29  202.77   10.56
   0  -6 -30  744.75   28.31
   0   6  30  698.58   27.82
   0  -6 -31   26.38    4.56
   0   6  31   23.64    4.55
   0  -6 -32   95.50    7.16
   0   6  32  100.59    6.97
   0  -6 -33   16.54    4.03
   0  -6 -34   38.77    4.63
   0  -6 -35   38.83    4.50
   0  -6 -36  235.44   10.76
   0  -6 -37   43.12    3.99
   0  -6 -38   12.17    2.71
   0  -6 -39  142.75    6.72
   0  -6 -40   32.19    2.63
   0  -6 -41    0.25    1.00
   0   7   0   -0.94    1.77
   0   7   0   -0.59    2.42
   0  -7   0   -0.29    3.54
   0   7   1    6.58    2.91
   0  -7   1    5.80    4.42
   0   7  -1    7.81    3.50
   0   7  -1    7.55    2.19
   0   7   1   10.16    2.40
   0  -7  -1    9.80    4.52
   0   7   2  854.61   35.06
   0   7  -2  850.51   32.40
   0  -7  -2  850.03   38.26
   0   7  -2  838.43   36.14
   0   7   2  812.01   31.77
   0  -7   2  818.90   38.34
   0   7  -3    7.83    3.95
   0  -7   3    6.47    4.51
   0   7   3    6.96    2.12
   0   7   3    5.80    2.94
   0  -7  -3    8.57    4.29
   0   7  -3    6.29    2.29
   0   7  -4    9.09    4.10
   0  -7  -4   10.22    4.56
   0   7   4    9.02    3.14
   0   7   4    9.90    2.27
   0  -7   4   13.41    5.21
   0   7  -4    9.82    2.78
   0   7   5  161.52    8.78
   0   7  -5  157.40   12.17
   0  -7  -5  153.76   12.37
   0   7  -5  158.05    9.74
   0  -7   5  158.30   13.58
   0  -7  -6   80.64    8.54
   0   7   6   72.91    5.50
   0  -7   6   82.64    9.67
   0   7  -6   73.52    6.48
   0   7  -6   71.75    7.11
   0   7  -6   80.85    8.80
   0   7   7  539.15   22.55
   0  -7   7  568.91   29.32
   0   7  -7  595.83   24.84
   0  -7  -7  561.53   27.49
   0   7  -7  550.08   27.83
   0   7  -7  492.50   25.01
   0   7   8  219.23   11.39
   0   7  -8  212.19   15.51
   0  -7   8  207.07   15.87
   0   7  -8  216.67   12.97
   0   7  -8  224.83   13.97
   0  -7  -8  222.05   14.93
   0   7   9  287.56   14.22
   0  -7  -9  310.29   18.28
   0  -7   9  298.02   19.47
   0   7  -9  310.10   17.12
   0   7  -9  315.96   16.52
   0   7  -9  288.53   18.92
   0  -7  -9  270.47   12.06
   0  -7  -9  302.07   13.10
   0  -7 -10 1319.99   52.04
   0   7  10 1253.66   47.15
   0  -7  10 1152.79   52.52
   0   7 -10 1370.26   50.94
   0   7 -10 1287.82   49.59
   0   7 -10 1176.85   52.89
   0  -7 -10 1207.45   43.93
   0   7  11   97.28    7.59
   0  -7 -11  107.57    9.86
   0   7 -11   98.03    8.81
   0  -7 -11  101.97    5.70
   0  -7 -12  818.82   36.51
   0   7 -12  832.12   35.74
   0   7  12  823.20   33.84
   0  -7 -12  802.62   29.68
   0   7  13   24.77    4.10
   0  -7 -13   18.41    4.27
   0   7 -13   25.53    4.53
   0  -7 -13   27.20    2.99
   0  -7 -13   24.34    3.85
   0   7  14    3.94    2.52
   0  -7 -14    2.52    1.94
   0   7 -14    2.23    2.08
   0  -7 -14    3.48    3.16
   0  -7 -15  182.57    8.38
   0  -7 -15  152.62    9.53
   0  -7 -16  120.18    6.41
   0  -7 -16  115.76    7.86
   0  -7 -17  188.84    8.53
   0  -7 -17  157.24    9.64
   0   7  17  164.24    8.10
   0  -7 -18   53.59    4.16
   0  -7 -18   56.79    5.65
   0   7  18   49.80    4.09
   0  -7 -19  321.23   13.27
   0   7  19  302.14   13.12
   0  -7 -19  304.57   14.94
   0  -7 -20   40.63    3.76
   0  -7 -20   41.93    5.37
   0   7  20   39.93    3.91
   0  -7 -21   51.12    4.36
   0   7  21   64.75    4.77
   0  -7 -21   73.93    6.55
   0  -7 -22  285.26   12.83
   0  -7 -22  302.26   14.78
   0   7  22  317.46   13.27
   0  -7 -23    2.64    2.30
   0  -7 -23    2.90    3.78
   0   7  23    4.10    2.66
   0  -7 -24   62.63    4.68
   0  -7 -24   68.94    6.74
   0   7  24   64.77    5.05
   0  -7 -25  181.35    9.00
   0  -7 -25  209.07   10.98
   0   7  25  183.62    9.54
   0  -7 -26   -0.07    2.05
   0  -7 -26    0.89    4.05
   0   7  26   -0.66    3.09
   0   7  27    4.48    3.19
   0  -7 -27    4.22    4.26
   0  -7 -28   43.57    5.67
   0   7  28   45.20    4.81
   0  -7 -29  141.67    8.80
   0   7  29  128.28    7.97
   0  -7 -30  228.31   11.38
   0   7  30  208.48   10.63
   0  -7 -31  155.84    9.15
   0   7  31  159.51    8.65
   0  -7 -32    2.00    3.69
   0  -7 -33   18.33    4.08
   0  -7 -34   30.51    4.08
   0  -7 -35  104.65    6.41
   0  -7 -36   47.28    4.30
   0  -7 -37  139.63    7.00
   0  -7 -38   34.11    3.11
   0   7  39    1.13    2.22
   0  -7 -39   -0.45    1.66
   0  -7 -40  192.89    8.10
   0   7  40  230.71    8.76
   0   7  41   12.95    1.75
   0   7  42   -0.02    0.72
   0   8   0   62.29    7.24
   0   8   0   61.26    5.15
   0  -8   0   62.63    8.60
   0  -8   0   58.85    4.48
   0  -8   1 1336.77   57.22
   0  -8  -1 1298.35   56.78
   0   8   1 1293.43   48.57
   0   8  -1 1282.42   48.86
   0   8  -1 1308.05   53.78
   0   8   1 1344.46   53.15
   0  -8   1 1307.36   46.96
   0  -8  -1 1375.22   46.54
   0  -8   2    3.39    3.58
   0  -8   2    2.49    2.12
   0  -8  -2    5.97    3.88
   0   8   2    2.22    1.64
   0   8  -2    2.22    2.92
   0   8  -2    2.17    1.79
   0   8   2    0.43    2.38
   0  -8  -2    2.79    2.00
   0   8   3  101.54    6.73
   0   8  -3  105.74    7.23
   0  -8   3  109.62   11.36
   0   8  -3  108.45    9.96
   0  -8  -3  113.72   11.28
   0  -8   3  109.66    6.06
   0  -8  -3   94.10    5.96
   0  -8  -3  106.10    5.78
   0   8  -4 1242.28   51.90
   0  -8   4 1143.08   53.55
   0   8   4 1144.26   45.71
   0  -8  -4 1216.01   53.71
   0  -8  -4 1237.23   44.46
   0  -8   4 1304.60   44.49
   0  -8  -4 1300.27   44.17
   0  -8  -5  746.29   35.73
   0  -8  -5  730.92   26.93
   0  -8  -5  722.70   27.57
   0  -8  -5  702.92   26.48
   0  -8  -6  497.78   27.21
   0  -8  -6  513.39   19.78
   0  -8  -6  496.35   20.42
   0  -8  -7   14.76    2.60
   0  -8  -7   12.37    4.13
   0  -8  -7   20.59    3.51
   0  -8  -8 1075.00   47.58
   0  -8  -8 1064.72   39.17
   0  -8  -8 1112.59   40.22
   0  -8  -9  158.94    7.85
   0  -8  -9  138.51    8.49
   0  -8 -10  533.64   20.63
   0  -8 -10  518.82   21.75
   0  -8 -11    4.05    2.45
   0  -8 -12 1464.71   51.86
   0  -8 -13  151.26    7.86
   0  -8 -14   66.89    4.87
   0   8  14   60.49    4.06
   0  -8 -15  596.55   21.48
   0  -8 -15  502.74   22.84
   0   8  15  533.71   20.64
   0  -8 -16   80.37    5.59
   0  -8 -16   87.95    7.29
   0   8  16   83.88    5.07
   0  -8 -17  561.56   21.30
   0  -8 -17  554.78   23.09
   0   8  17  518.54   20.61
   0  -8 -18  162.80    8.40
   0   8  18  162.67    8.03
   0  -8 -18  173.94   10.25
   0  -8 -19    3.26    2.46
   0   8  19    4.12    2.20
   0  -8 -19    7.63    4.40
   0  -8 -20  110.05    6.65
   0   8  20  115.23    6.45
   0  -8 -20  101.65    8.25
   0  -8 -21  444.06   18.50
   0  -8 -21  456.50   20.49
   0   8  21  475.81   18.46
   0  -8 -22  399.95   16.66
   0   8  22  411.59   16.56
   0  -8 -22  396.45   18.49
   0  -8 -23  177.49    9.07
   0  -8 -23  184.92   10.98
   0   8  23  186.12    9.08
   0  -8 -24  131.17    7.23
   0   8  24  135.49    7.36
   0  -8 -24  115.82    8.95
   0  -8 -25    9.37    2.75
   0  -8 -25    7.42    4.86
   0   8  25   11.66    3.07
   0  -8 -26  355.49   14.70
   0  -8 -26  364.49   16.65
   0   8  26  349.19   15.05
   0  -8 -27  177.35    8.53
   0  -8 -27  170.97   10.39
   0   8  27  172.22    8.95
   0  -8 -28   80.74    7.10
   0   8  28   77.48    5.78
   0  -8 -29  172.83    9.83
   0   8  29  160.88    8.56
   0  -8 -30   70.82    6.09
   0   8  30   59.08    5.11
   0  -8 -31  227.92   11.39
   0  -8 -32   65.42    5.85
   0  -8 -33   76.13    5.90
   0  -8 -34   23.56    3.60
   0  -8 -35  259.27   11.25
   0  -8 -36   66.74    4.44
   0   8  37  232.69    9.78
   0  -8 -37  230.80    9.62
   0   8  38   93.00    4.79
   0  -8 -38   92.40    4.68
   0   8  39    2.76    1.47
   0  -8 -39    2.66    1.12
   0   8  40   49.87    2.56
   0  -9   0   -0.31    2.35
   0  -9   0    1.90    2.18
   0  -9   1    1.09    2.33
   0  -9  -1    0.20    2.19
   0  -9   1    0.19    2.01
   0  -9   2   32.35    3.82
   0  -9  -2   50.57    4.14
   0  -9   2   43.56    3.78
   0  -9   3  569.83   21.23
   0  -9   3  598.53   20.73
   0  -9  -4   43.57    4.20
   0  -9   4   47.99    4.21
   0  -9   4   40.17    3.50
   0  -9  -4   37.06    4.42
   0  -9  -5   57.82    4.85
   0  -9   5   63.33    4.82
   0  -9  -5   72.81    5.89
   0  -9   6  863.54   30.88
   0  -9  -6  783.09   30.80
   0  -9  -6  836.05   31.92
   0  -9   7    1.22    2.38
   0  -9  -7    0.24    2.41
   0  -9  -7    1.88    3.24
   0  -9   8  181.54    9.18
   0  -9  -8  176.91    9.28
   0  -9  -8  202.86   10.49
   0  -9   9    5.33    2.46
   0  -9  -9    3.30    2.51
   0  -9  -9    7.62    3.81
   0  -9  10 1532.62   52.43
   0  -9 -10 1382.56   52.36
   0  -9 -10 1524.54   54.15
   0  -9 -11  167.88    8.56
   0  -9 -11  153.65    9.89
   0  -9 -12   43.92    4.33
   0  -9 -13  129.34    7.45
   0  -9 -14  233.13   11.00
   0  -9 -15    7.69    2.92
   0  -9 -16   69.24    5.10
   0  -9 -16   59.02    6.87
   0   9  16   61.02    4.17
   0  -9 -17  584.25   22.52
   0   9  17  560.43   21.53
   0  -9 -17  584.74   24.79
   0  -9  18   40.30    3.68
   0  -9 -18   35.87    4.26
   0  -9 -18   32.00    5.71
   0   9  18   37.30    3.36
   0  -9 -19   19.44    3.62
   0  -9  19   19.38    2.69
   0   9  19   13.47    2.51
   0  -9 -19   13.16    5.17
   0  -9 -20  403.02   17.15
   0   9  20  419.89   16.61
   0  -9 -20  440.98   19.54
   0  -9 -21  399.75   16.61
   0  -9 -21  393.51   18.69
   0   9  21  399.86   16.03
   0  -9 -22    7.36    2.99
   0  -9 -22   10.67    5.06
   0   9  22    7.58    2.49
   0  -9 -23    1.62    2.67
   0  -9 -23    2.91    5.02
   0   9  23    2.87    2.35
   0  -9 -24  661.78   24.85
   0   9  24  626.23   24.53
   0  -9 -24  679.04   26.86
   0  -9 -25  108.84    6.51
   0  -9 -25  133.04    8.84
   0   9  25  110.82    6.54
   0  -9 -26  109.18    6.11
   0  -9 -26   83.89    7.77
   0   9  26   95.63    5.98
   0  -9 -27  111.90    6.17
   0  -9 -27  107.69    8.10
   0   9  27  111.06    6.38
   0  -9 -28   67.71    4.50
   0  -9 -28   82.50    6.66
   0   9  28   66.47    4.86
   0  -9 -29   15.86    4.78
   0  -9 -30   82.69    6.43
   0  -9 -31  126.88    7.61
   0  -9 -32   49.55    4.70
   0  -9 -33   11.02    3.25
   0  -9 -34   10.25    2.82
   0   9  35   59.99    3.85
   0  -9 -35   62.77    4.23
   0   9  36    9.81    1.79
   0  -9 -36    9.42    2.16
   0  -9 -37   22.99    2.09
   0   9  37   16.38    1.70
   0  -9 -38    0.51    0.91
   0 -10   0   97.04    6.72
   0 -10   1   60.90    5.25
   0 -10  -1   64.83    5.70
   0 -10   2  100.35    6.77
   0 -10  -2  106.31    7.37
   0 -10   3  375.93   15.99
   0 -10  -3  360.47   16.62
   0 -10  -4    5.75    3.27
   0 -10   4    6.86    3.27
   0 -10   4    9.00    2.72
   0 -10  -4   11.46    3.85
   0 -10  -5  166.42    9.16
   0 -10   5  174.20    9.19
   0 -10  -5  165.08    9.84
   0 -10   6   60.04    4.98
   0 -10  -6   53.39    5.16
   0 -10  -6   56.73    6.03
   0 -10   7   14.25    3.32
   0 -10  -7   13.57    3.41
   0 -10  -7   24.45    4.80
   0 -10  -8  276.99   12.70
   0 -10   8  279.05   12.63
   0 -10  -8  249.01   13.64
   0 -10   9  969.13   35.73
   0 -10  -9  984.01   35.83
   0 -10  -9  922.12   37.22
   0 -10 -10   55.81    5.05
   0 -10  10   56.14    4.88
   0 -10 -10   34.99    5.89
   0 -10  11  190.22    9.47
   0 -10 -11  193.12    9.67
   0 -10 -11  161.82   10.83
   0 -10  12    3.72    2.77
   0 -10 -12    2.08    3.17
   0 -10 -12    2.78    4.85
   0 -10  13    2.37    2.68
   0 -10 -13    1.90    3.15
   0 -10 -13    1.20    4.44
   0 -10  14  100.35    6.28
   0 -10 -14   97.15    6.67
   0 -10  15  114.40    6.73
   0 -10 -15  109.65    7.04
   0 -10  16   20.49    3.18
   0 -10 -16   20.15    3.95
   0 -10 -17  564.29   22.45
   0 -10  17  563.03   21.91
   0 -10 -18   34.66    4.49
   0 -10  18   33.05    3.46
   0 -10 -18   37.74    6.24
   0 -10  19  336.62   13.88
   0 -10 -19  336.27   14.60
   0 -10 -19  316.23   16.47
   0 -10 -20   96.76    6.27
   0 -10 -20   93.51    8.52
   0  10  20   85.16    5.02
   0 -10 -21   10.54    3.12
   0 -10 -21    7.13    5.42
   0  10  21    7.96    2.11
   0 -10 -22   74.50    5.42
   0 -10 -22   82.52    7.78
   0  10  22   70.84    4.56
   0 -10 -23    1.55    2.78
   0 -10 -23    0.11    5.10
   0  10  23    0.79    1.82
   0 -10 -24   64.83    4.78
   0  10  24   51.73    3.95
   0 -10 -24   63.83    6.85
   0 -10 -25   71.17    5.01
   0 -10 -25   67.17    6.94
   0 -10 -26   41.00    3.72
   0 -10 -26   41.56    5.97
   0 -10 -27  377.02   15.19
   0 -10 -27  400.50   16.80
   0 -10 -28   88.56    4.85
   0 -10 -28   84.46    6.81
   0 -10 -29    1.79    3.75
   0 -10 -30    0.68    3.05
   0 -10 -31    1.48    2.97
   0 -10 -32  246.60   10.03
   0  10  32  208.59    8.91
   0  10  33  204.89    8.78
   0 -10 -33  285.31   10.14
   0  10  34    6.43    1.06
   0 -10 -34   12.61    2.23
   0 -10 -35  124.74    5.64
   0 -10 -36   34.35    2.21
   0 -11   0    1.64    3.29
   0 -11   0    1.69    3.54
   0 -11   1  163.85    9.25
   0 -11  -1  168.81    9.89
   0 -11   1  162.29    9.81
   0 -11   2    3.28    3.45
   0 -11   2    1.21    3.51
   0 -11  -2    3.15    3.85
   0 -11   3   69.43    5.82
   0 -11  -3   69.72    6.63
   0 -11  -4   19.67    4.00
   0 -11   4   21.24    4.15
   0 -11  -4   26.13    5.10
   0 -11  -5  120.73    7.62
   0 -11   5  112.24    7.58
   0 -11  -5  132.04    8.90
   0 -11   6    0.75    3.14
   0 -11  -6    0.38    3.35
   0 -11  -6    5.55    4.20
   0 -11   7   14.46    3.74
   0 -11  -7    9.47    3.58
   0 -11  -7   18.40    5.17
   0 -11  -8  650.12   26.40
   0 -11   8  711.51   26.52
   0 -11  -8  657.81   27.88
   0 -11   9   16.74    3.69
   0 -11  -9   14.88    4.01
   0 -11  -9   11.72    5.06
   0 -11 -10   68.05    5.68
   0 -11  10   56.40    5.39
   0 -11 -10   69.22    7.37
   0 -11  11  250.07   11.83
   0 -11 -11  241.85   12.02
   0 -11 -11  257.89   14.00
   0 -11  12   10.67    3.27
   0 -11 -12   11.88    3.76
   0 -11 -12   12.57    5.16
   0 -11  13   34.98    4.05
   0 -11 -13   38.33    4.63
   0 -11 -13   33.60    6.37
   0 -11 -14   33.20    4.93
   0 -11  14   38.98    4.24
   0 -11 -14   43.02    6.82
   0 -11 -15   30.12    4.42
   0 -11  15   29.40    3.72
   0 -11  16   56.64    4.68
   0 -11 -16   63.33    5.31
   0 -11 -17  282.80   12.46
   0 -11  17  252.43   11.61
   0 -11 -18   17.20    3.77
   0 -11  18   17.31    2.84
   0 -11 -19   14.41    3.61
   0 -11  19   11.71    2.31
   0 -11 -20   11.26    3.48
   0 -11 -20   21.35    5.79
   0 -11 -21  128.56    7.27
   0 -11 -21  117.00    9.07
   0 -11 -22  128.42    7.12
   0 -11 -22  116.36    9.15
   0 -11 -23    6.20    2.76
   0 -11 -23    6.23    5.01
   0 -11 -24   22.70    3.25
   0 -11 -24   25.84    5.19
   0 -11 -25   35.63    3.40
   0 -11 -25   36.76    5.29
   0 -11 -26    6.81    2.18
   0 -11 -26    6.27    3.97
   0 -11 -27   45.74    3.28
   0 -11 -27   46.87    4.97
   0 -11 -28   15.65    1.89
   0 -11 -28   17.73    3.74
   0 -11 -29    4.29    2.85
   0 -11 -30   45.24    3.97
   0 -11 -31   34.54    3.26
   0 -11 -32  239.37    9.67
   0 -11 -33  145.97    6.30
   0 -11 -34  218.05    8.36
   0 -12   0   87.22    7.19
   0 -12   0  109.64    8.02
   0 -12   1   27.05    4.90
   0 -12  -1   26.00    4.91
   0 -12   1   26.17    4.59
   0 -12   2  304.32   14.58
   0 -12  -2  338.66   15.75
   0 -12   2  321.31   15.15
   0 -12   3  246.69   12.20
   0 -12  -3  237.85   13.18
   0 -12   3  249.23   12.58
   0 -12  -4  374.00   18.31
   0 -12   4  464.96   18.94
   0 -12  -4  446.97   19.84
   0 -12   4  472.90   19.24
   0 -12   5    2.08    3.45
   0 -12  -5    1.89    3.81
   0 -12  -5    0.89    4.55
   0 -12   5   -0.84    3.53
   0 -12  -6   13.73    4.19
   0 -12   6   16.00    3.98
   0 -12   6   23.31    4.19
   0 -12  -6   19.55    5.40
   0 -12  -7  263.96   13.03
   0 -12   7  267.31   12.74
   0 -12   7  282.17   13.19
   0 -12  -7  275.26   14.32
   0 -12   8   85.49    6.39
   0 -12  -8   83.35    6.72
   0 -12   8   90.22    6.66
   0 -12  -8   88.93    7.91
   0 -12   9   21.57    3.86
   0 -12  -9   21.25    4.68
   0 -12  -9   19.66    5.53
   0 -12   9   20.10    3.71
   0 -12 -10   71.05    6.20
   0 -12  10   80.76    5.90
   0 -12 -10   61.51    7.39
   0 -12 -11  118.46    7.57
   0 -12  11  115.65    7.20
   0 -12 -11  108.05    8.97
   0 -12 -12  114.72    7.62
   0 -12  12  121.22    7.09
   0 -12 -12  107.70    8.84
   0 -12 -13    6.69    3.74
   0 -12  13    4.21    2.77
   0 -12 -13    1.88    5.05
   0 -12 -14   52.64    5.50
   0 -12  14   53.34    4.47
   0 -12 -14   45.83    6.64
   0 -12 -15   52.28    5.24
   0 -12  15   55.35    4.46
   0 -12 -15   56.77    6.90
   0 -12 -16  170.00    8.73
   0 -12  16  158.13    7.92
   0 -12 -16  148.14   10.13
   0 -12 -17   41.38    4.51
   0 -12  17   33.85    3.29
   0 -12  18   47.77    3.55
   0 -12 -18   49.49    4.78
   0 -12 -19   32.57    4.04
   0 -12 -20    7.00    3.01
   0 -12 -21   27.07    3.44
   0 -12 -22  133.53    6.92
   0 -12 -23   24.55    3.06
   0 -12 -23   24.60    4.44
   0 -12 -24   16.43    2.58
   0 -12 -24   16.94    3.93
   0 -12 -25    9.93    2.00
   0 -12 -25    8.24    3.40
   0 -12 -26    3.31    1.42
   0 -12 -26    5.28    3.04
   0 -12 -27    7.91    1.32
   0 -12 -27    8.95    2.75
   0 -12 -28  200.21    8.74
   0 -12 -29   71.23    4.18
   0 -12 -30   77.55    4.09
   0 -12 -31  143.99    6.00
   0 -12 -32    2.42    0.80
   0 -13   0   -0.71    3.69
   0 -13   0   -0.11    3.57
   0 -13  -1    8.66    3.98
   0 -13   1    7.76    4.05
   0 -13   1   12.42    4.17
   0 -13  -1    9.43    4.54
   0 -13   2  659.22   26.36
   0 -13   2  677.70   26.92
   0 -13  -2  687.92   27.34
   0 -13   3   47.96    5.33
   0 -13   3   48.59    5.29
   0 -13  -3   46.44    5.93
   0 -13   4  266.95   12.52
   0 -13   4  265.00   12.90
   0 -13  -4  268.02   13.65
   0 -13  -5  139.33    8.76
   0 -13   5  161.32    8.73
   0 -13   5  148.31    8.66
   0 -13  -5  149.84    9.70
   0 -13  -6    9.01    4.28
   0 -13   6   12.00    3.55
   0 -13  -6    6.53    4.67
   0 -13   6    8.26    3.36
   0 -13  -7  162.20    9.01
   0 -13   7  149.77    8.50
   0 -13  -7  164.82   10.06
   0 -13   7  152.09    8.68
   0 -13  -8   23.50    4.81
   0 -13   8   25.14    3.91
   0 -13  -8   29.12    5.64
   0 -13   8   24.55    3.74
   0 -13  -9    5.42    4.12
   0 -13   9    6.39    3.12
   0 -13   9    4.09    2.66
   0 -13  -9    6.18    4.53
   0 -13 -10   55.43    5.33
   0 -13  10   44.15    4.40
   0 -13  10   43.39    4.22
   0 -13 -10   45.25    6.05
   0 -13  11    8.93    2.90
   0 -13 -11   10.97    4.28
   0 -13  11   11.54    2.71
   0 -13 -11   10.89    4.80
   0 -13 -12    2.58    3.82
   0 -13  12    1.27    2.52
   0 -13 -12    2.25    4.49
   0 -13  13    1.07    2.22
   0 -13 -13    3.56    3.65
   0 -13 -13    4.88    4.57
   0 -13 -14   12.91    3.66
   0 -13  14   14.17    2.59
   0 -13 -14   15.87    4.77
   0 -13 -15    9.82    3.45
   0 -13  15   10.01    2.15
   0 -13 -15    6.68    4.50
   0 -13 -16    1.53    3.22
   0 -13  16    1.51    1.62
   0 -13 -16   -1.11    3.95
   0 -13 -17   25.50    3.57
   0 -13  17   20.30    2.07
   0 -13 -17   27.21    4.71
   0 -13 -18    6.95    2.74
   0 -13 -18    8.69    4.18
   0 -13 -19   49.01    4.02
   0 -13 -19   39.80    4.95
   0 -13 -20   -0.67    2.21
   0 -13 -21    2.11    2.08
   0 -13 -22    3.84    1.95
   0 -13 -23   54.88    3.36
   0 -13 -24   26.17    2.17
   0 -13 -25   13.09    1.36
   0 -13 -26   52.70    3.46
   0 -13 -27   52.22    3.14
   0 -13 -28    4.42    1.22
   0 -13 -29   54.50    2.61
   0 -14   0  463.22   18.42
   0 -14   0  447.39   18.77
   0 -14  -1  126.88    7.43
   0 -14   1  138.30    7.47
   0 -14  -1  121.34    7.75
   0 -14   1  111.00    7.39
   0 -14   2  208.88   10.30
   0 -14   2  210.57   10.53
   0 -14  -2  223.38   11.01
   0 -14   3  194.76    9.70
   0 -14   3  192.03    9.83
   0 -14  -3  208.38   10.50
   0 -14   4    9.10    3.40
   0 -14   4   10.63    3.10
   0 -14  -4   12.00    4.01
   0 -14   5  159.01    8.02
   0 -14   5  134.66    7.63
   0 -14  -5  145.08    8.66
   0 -14   6  196.19    9.23
   0 -14  -6  190.90    9.72
   0 -14  -6  200.48   10.30
   0 -14   6  187.19    9.19
   0 -14  -7   29.94    4.39
   0 -14   7   29.60    3.57
   0 -14   7   21.81    3.09
   0 -14  -7   24.19    4.36
   0 -14   8    2.61    2.46
   0 -14  -8    2.71    3.46
   0 -14   8    0.49    1.78
   0 -14  -8    1.32    3.28
   0 -14   9  145.68    7.18
   0 -14  -9  137.12    7.74
   0 -14  -9  136.59    8.32
   0 -14  10    6.02    2.30
   0 -14 -10    7.52    3.45
   0 -14 -10    8.43    3.80
   0 -14 -11   37.42    4.32
   0 -14  11   37.68    3.22
   0 -14 -11   32.55    4.72
   0 -14 -12  122.93    6.64
   0 -14  12  115.32    5.84
   0 -14 -12  117.60    7.38
   0 -14  13    0.75    1.60
   0 -14 -13    1.58    2.91
   0 -14 -13    0.83    3.06
   0 -14  14   84.93    4.41
   0 -14 -14   96.65    5.70
   0 -14 -14   96.05    6.22
   0 -14 -15   10.36    2.82
   0 -14  15    6.43    1.23
   0 -14 -15   10.49    3.25
   0 -14 -16    0.50    2.27
   0 -14 -16    1.33    2.82
   0 -14 -17    5.38    2.29
   0 -14 -17    8.07    2.96
   0 -14 -18   45.16    3.38
   0 -14 -18   45.32    3.96
   0 -14 -19    0.34    1.73
   0 -14 -19   -0.20    2.13
   0 -14 -20    0.81    1.51
   0 -14 -20   -0.84    2.09
   0 -14 -21    8.21    1.49
   0 -14 -21   11.06    2.09
   0 -14 -22    3.14    1.00
   0 -14 -22    4.39    1.58
   0 -14 -23   71.18    3.23
   0 -14 -23   96.07    4.05
   0 -14 -24   33.23    2.14
   0 -14 -25    2.96    0.76
   0 -15   0    0.31    2.41
   0 -15   0    1.59    1.85
   0 -15   1   -0.10    2.30
   0 -15  -1    0.63    2.45
   0 -15   1    0.34    1.75
   0 -15  -1    0.16    1.92
   0 -15  -2    1.69    2.62
   0 -15   2    0.25    2.33
   0 -15   2    0.37    1.54
   0 -15  -2    1.80    2.11
   0 -15   3   95.02    4.94
   0 -15  -3   77.18    4.74
   0 -15   3   62.67    3.97
   0 -15   4    0.63    2.17
   0 -15  -4    1.74    2.06
   0 -15   5  305.03   11.77
   0 -15  -5  273.74   11.98
   0 -15   6   10.57    2.23
   0 -15  -6    7.48    2.81
   0 -15  -6   12.83    2.50
   0 -15  -7    0.15    2.52
   0 -15   7    0.04    1.77
   0 -15  -7   -0.22    2.15
   0 -15  -8   19.21    3.09
   0 -15   8   20.58    2.28
   0 -15  -8   20.29    2.86
   0 -15  -9   14.77    2.77
   0 -15   9   14.49    1.81
   0 -15  -9   15.91    2.69
   0 -15  10    4.92    1.37
   0 -15 -10    9.21    2.53
   0 -15 -10    5.36    2.24
   0 -15  11   34.15    2.28
   0 -15 -11   52.26    3.59
   0 -15 -11   44.94    3.39
   0 -15 -12    8.45    2.23
   0 -15  12    4.93    0.89
   0 -15 -12    7.82    2.06
   0 -15 -13   38.91    3.10
   0 -15 -13   38.79    2.98
   0 -15 -14    6.81    1.91
   0 -15 -14    4.43    1.64
   0 -15 -15   20.63    2.13
   0 -15 -15   16.27    1.99
   0 -15 -16   67.29    3.46
   0 -15 -16   59.82    3.37
   0 -15 -17    6.02    1.27
   0 -15 -17    5.77    1.31
   0 -15 -18    1.22    0.88
   0 -15 -18    1.34    0.91
   0 -15 -19   42.99    2.01
   0 -15 -19   34.44    2.01
   0 -16   0   63.83    3.42
   0 -16   1   15.73    1.78
   0 -16  -1   15.03    1.81
   0 -16   2  171.51    6.93
   0 -16  -2  171.90    7.12
   0 -16   3  224.24    9.06
   0 -16  -3  259.81    9.45
   0 -16  -4    1.05    1.44
   0 -16   4   -0.10    0.98
   0 -16   5    7.25    1.11
   0 -16   6    0.38    0.67
   0 -16  -8    2.99    1.29
   0 -16  -9   34.20    2.20
   0 -16 -10   13.78    1.45
   0 -16 -11    1.72    0.91
   0 -16 -12   24.42    1.59
   0 -16 -13    0.34    0.54
  -1   0   0    1.68    2.37
  -1   0   0   -0.48    2.00
  -1   0   1  107.31    5.66
  -1   0  -1  101.23    5.78
  -1   0   1  108.55    5.45
  -1   0   2 9936.06  315.49
  -1   0   2 9553.08  315.49
  -1   0   3  124.60    6.11
  -1   0   3  119.10    6.33
   1   0  -3  111.87    6.20
  -1   0   4  796.89   28.22
   1   0  -4  710.61   28.43
  -1   0   4  805.06   28.77
   1   0  -4  825.04   28.09
  -1   0   5 2948.56  100.61
   1   0  -5 2682.87  100.21
   1   0  -5 3021.54   99.85
  -1   0   5 3057.42   99.93
  -1   0   6 2912.32  106.52
   1   0  -6 3103.00  106.18
   1   0  -6 3111.80  106.35
  -1   0  -6 3132.42  108.04
  -1   0   6 3275.26  106.06
  -1   0   7 8995.98  291.33
   1   0  -7 9031.52  291.42
  -1   0   7 8828.34  290.95
   1   0  -7 8168.66  291.23
  -1   0  -7 8051.00  292.95
  -1   0   8   87.43    5.34
  -1   0  -8   90.72    7.55
   1   0  -8   81.47    5.77
   1   0  -8   89.78    6.39
  -1   0   8   77.12    5.50
   1   0  -9  234.94   11.24
  -1   0  -9  218.20   12.62
   1   0  -9  257.78   12.07
  -1   0   9  238.20   11.00
  -1   0   9  237.27   11.04
   1   0 -10   86.34    6.99
  -1   0  10   77.00    5.82
   1   0 -10   88.37    6.02
  -1   0  10   91.05    6.09
  -1   0 -10   81.72    7.41
   1   0 -11   89.37    6.41
  -1   0  11   95.63    6.67
  -1   0  11   91.00    6.14
   1   0 -11   93.74    7.35
  -1   0 -11   95.63    7.69
  -1   0  12  121.82    7.53
   1   0 -12  120.68    9.16
   1   0 -12  137.75    8.15
  -1   0  12  144.60    8.72
  -1   0 -12  137.37    9.33
  -1   0 -13  339.92   17.22
  -1   0  13  350.42   16.57
   1   0 -13  347.21   17.20
   1   0 -13  324.36   15.59
  -1   0 -13  352.00   16.99
   1   0 -14  300.41   14.62
   1   0 -14  300.86   16.12
  -1   0 -14  296.13   16.16
  -1   0 -14  303.47   15.82
  -1   0  14  326.49   16.00
   1   0 -15  817.13   33.05
  -1   0 -15  810.13   34.97
   1   0 -15  855.67   35.21
  -1   0  15  859.16   34.79
  -1   0 -15  845.32   34.28
  -1   0 -16  155.69   11.66
   1   0 -16  183.00   10.73
   1   0 -16  183.60   12.50
  -1   0 -16  190.72   11.49
  -1   0  16  178.96   12.07
   1   0 -17  244.54   13.24
   1   0 -17  217.62   14.63
  -1   0  17  253.81   15.33
  -1   0 -17  237.30   13.72
   1   0 -18 1294.87   48.82
  -1   0 -18 1217.73   49.05
   1   0 -18 1267.67   51.37
  -1   0  18 1278.77   51.68
  -1   0  19   69.61    8.45
   1   0 -19   70.83    6.81
  -1   0 -19   67.57    6.91
   1   0 -19   67.32    8.06
  -1   0 -20   32.01    4.98
   1   0 -20   31.68    4.79
  -1   0  20   32.39    6.53
  -1   0 -20   26.10    5.76
   1   0 -20   29.61    5.93
   1   0 -21  100.99   10.07
   1   0 -21   84.44    5.08
   1   0 -22   13.52    4.46
   1   0 -22   11.23    1.82
   1   0 -22   14.05    2.35
   1   0 -23  747.41   26.56
   1   0 -23  777.30   27.37
  -1   0  23  677.93   26.76
   1   0 -24   -0.21    1.42
  -1   0  24    0.38    1.89
   1   0 -24   -0.07    2.13
   1   0 -25  533.30   20.19
   1   0 -25  550.16   21.03
  -1   0  25  530.38   20.68
   1   0 -26    6.55    1.88
   1   0 -26    6.24    2.69
  -1   0  26    6.01    2.36
  -1   0  27   21.74    3.21
   1   0 -27   21.25    3.41
   1   0 -28   28.90    3.72
  -1   0  28   28.04    3.60
   1   0 -29    1.70    2.57
  -1   0  29    0.90    2.41
  -1   0  30   15.70    3.09
   1   0 -30   14.38    3.30
   1   0 -31  307.98   13.97
   1   0  31  324.15   14.53
  -1   0  31  292.60   13.35
   1   0  32   11.85    4.15
   1   0 -32   14.87    3.89
  -1   0  32   13.88    3.21
   1   0  33 1224.94   44.93
   1   0 -33 1266.56   44.54
  -1   0  33 1176.66   43.79
   1   0  34   21.18    4.65
   1   0 -34   20.07    4.17
   1   0 -35  361.78   15.78
   1   0  35  367.86   16.18
   1   0  36  170.47    9.71
   1   0 -36  179.48    9.45
   1   0  37  134.45    8.14
   1   0 -37  131.79    7.78
   1   0  38   73.49    6.12
   1   0 -38   77.10    5.57
   1   0 -39  133.60    7.23
   1   0  39  122.53    7.58
   1   0  40   39.14    4.45
  -1   0  40   35.92    3.42
   1   0  41    2.35    2.88
  -1   0  41    1.92    1.90
   1   0  42   26.71    3.33
   1   0  43    5.27    2.01
   1   0  44    0.51    1.37
   1   0  45    0.41    0.73
   1  -1  44   54.16    2.81
  -1   1  43   11.01    1.61
   1  -1  43   13.61    1.97
   1  -1  42   45.64    3.56
  -1   1  42   51.04    3.42
  -1   1  41   31.41    3.26
   1  -1  41   30.45    3.51
   1  -1  40   63.80    4.93
   1  -1  39   54.48    4.87
   1  -1  38   95.85    6.46
   1  -1  37   98.15    6.99
   1   1 -37  106.20    6.73
   1   1 -36  209.10   10.12
   1  -1  36  180.53   10.22
   1   1 -35   76.46    5.93
   1  -1  35   74.98    6.35
  -1   1  35   70.18    5.60
   1  -1  34   89.36    6.91
   1   1 -34   97.01    6.71
  -1   1  34   88.75    6.37
   1   1 -33  134.50    8.19
   1  -1  33  136.36    8.46
  -1   1  33  146.41    8.05
   1  -1  32  503.66   21.06
   1   1 -32  524.52   20.99
  -1   1  32  506.67   20.62
   1   1 -31   67.48    5.84
   1  -1  31   63.48    6.03
  -1   1  31   69.44    5.66
   1   1 -30  252.05   11.98
   1  -1  30  244.28   12.26
  -1   1  30  260.82   11.85
   1  -1  29   91.32    6.66
   1   1 -29   89.28    6.24
  -1   1  29   82.49    5.83
   1  -1  28  343.67   14.98
   1   1 -28  342.20   14.66
  -1   1  28  330.76   14.44
   1   1 -27  261.57   11.92
  -1   1  27  257.11   11.69
   1   1 -26  371.15   15.20
  -1   1  26  350.45   15.03
   1   1 -25   84.11    5.42
  -1   1  25   70.48    5.12
   1   1 -24  287.85   12.14
   1   1 -24  328.94   13.18
   1   1 -23  202.27    8.88
   1   1 -23  214.37    9.60
   1   1 -22  277.12   11.28
   1   1 -22  289.36   19.47
   1   1 -22  280.89   11.85
   1   1 -21  390.96   23.80
   1   1 -21  424.18   16.52
  -1  -1 -20  566.46   25.28
   1   1 -20  581.10   25.70
   1   1 -20  608.86   29.67
  -1  -1 -20  554.43   28.52
  -1   1  20  572.78   28.92
   1   1 -20  547.83   21.08
  -1  -1 -19  204.05   12.31
  -1  -1 -19  201.37   14.49
   1   1 -19  214.02   12.47
   1   1 -19  231.97   15.74
  -1   1  19  216.07   14.72
   1   1 -18  186.59   11.19
  -1  -1 -18  172.49   12.94
   1   1 -18  183.35   13.77
  -1  -1 -18  183.15   11.18
  -1   1  18  195.72   13.22
  -1  -1 -17  308.91   15.76
   1   1 -17  318.14   15.66
   1   1 -17  309.65   18.50
  -1   1  17  331.27   17.96
   1   1 -16  454.68   20.28
   1   1 -16  446.19   23.13
  -1   1  16  469.22   22.17
  -1  -1 -16  463.21   20.70
   1   1 -15  232.80   12.22
   1   1 -15  248.93   14.92
  -1   1  15  232.38   13.35
  -1  -1 -15  237.98   12.70
   1   1 -14 2006.38   71.78
   1   1 -14 2070.80   75.48
  -1  -1 -14 1976.05   72.46
  -1   1  14 2033.51   73.19
   1   1 -13  678.03   26.49
   1   1 -13  671.52   29.34
  -1  -1 -13  663.53   27.10
  -1   1  13  665.70   27.47
  -1   1  12  292.08   14.19
   1   1 -12  296.20   13.46
   1   1 -12  311.25   16.10
  -1  -1 -12  291.16   14.19
  -1   1  11  200.65   10.23
  -1  -1 -11  207.58   10.90
   1   1 -11  194.94   12.07
   1   1 -11  182.66    9.61
   1   1 -10   53.87    4.55
   1   1 -10   47.94    6.48
  -1   1  10   54.41    4.90
  -1  -1 -10   53.13    5.38
   1   1  -9 2108.65   72.12
   1   1  -9 2134.48   74.80
  -1   1   9 2003.25   72.40
  -1  -1  -9 2074.83   73.30
   1   1  -8 3208.41  110.43
   1   1  -8 3351.04  112.60
  -1  -1  -8 3110.08  111.55
  -1   1   8 3292.97  110.91
  -1   1   7 4690.45  163.46
   1   1  -7 4825.80  164.79
   1   1  -7 4886.89  163.12
  -1  -1  -7 4887.19  164.35
  -1   1   6 2771.35   95.49
   1   1  -6 2811.74   96.50
   1   1  -6 2816.03   95.02
  -1  -1  -6 2724.41   96.26
  -1   1   5 4398.87  147.39
  -1   1   5 4403.26  149.56
  -1  -1  -5 4169.26  149.92
   1   1  -5 4478.33  148.81
   1   1  -5 4600.31  150.25
   1   1  -4  507.69   17.86
  -1   1   4  492.32   18.67
   1   1  -4  452.28   18.92
  -1  -1  -4  440.85   18.54
  -1  -1  -3 5088.05  182.11
  -1   1   3 5355.75  181.63
   1   1  -3 5362.38  180.82
  -1   1   3 5472.84  179.93
   1   1  -3 5371.19  181.94
  -1   1   2 3173.47  109.90
  -1   1   2 3221.01  108.14
   1   1  -2 3540.35  109.04
  -1  -1  -2 3401.96  110.35
  -1   1   1 1300.36   44.30
  -1   1   1 1293.22   45.88
  -1  -1  -1 1251.00   44.57
  -1  -1  -1 1389.07   46.29
  -1  -1   0  539.82   19.48
  -1  -1   0  572.05   21.21
  -1   1   0  541.11   21.13
  -1  -1   1 1304.47   43.99
  -1   1  -1 1243.75   45.70
  -1  -1   1 1279.59   45.74
  -1  -1   2 3226.99  108.50
  -1  -1   2 3204.62  110.42
  -1  -1   3 5263.68  178.22
  -1  -1   3 5448.73  180.49
  -1  -1   4  516.16   21.14
  -1  -1   4  515.14   18.68
  -1  -1   5 4456.36  148.69
  -1   1  -5 4356.96  150.23
  -1  -1   5 4369.02  151.24
  -1  -1   6 2860.55   97.78
  -1   1  -6 2946.58   99.42
  -1  -1   6 2808.00  100.25
  -1   1  -7 4741.01  155.06
  -1  -1   7 4483.83  153.42
  -1  -1   7 4358.18  155.50
  -1   1  -8 3303.06  112.97
  -1  -1   8 3091.33  111.86
  -1   1  -8 3182.44  111.71
  -1  -1   8 3269.62  110.12
  -1  -1   9 2007.59   72.33
  -1   1  -9 2034.35   72.60
   1  -1  -9 1963.25   70.13
  -1   1  -9 1972.56   73.49
  -1  -1   9 2126.95   71.04
  -1   1 -10   82.54    7.12
  -1  -1  10   81.93    6.13
   1  -1 -10   76.72    5.78
  -1  -1  10   77.79    6.86
  -1   1 -10   70.90    7.91
  -1   1 -11  226.90   12.72
   1  -1 -11  228.35   11.30
  -1  -1  11  207.57   11.71
  -1   1 -11  217.07   13.46
  -1  -1  11  224.34   11.78
  -1   1 -12  251.12   14.73
  -1   1 -12  249.65   14.98
  -1  -1  12  262.24   13.38
  -1  -1  12  260.70   13.47
   1  -1 -12  284.34   13.27
  -1  -1  13  703.89   28.99
   1  -1 -13  712.22   28.96
  -1   1 -13  743.93   31.15
  -1   1 -13  709.58   30.85
  -1  -1  13  729.60   29.97
  -1  -1  14 2060.15   73.84
  -1  -1  14 2090.04   75.46
   1  -1 -14 1978.01   74.13
  -1   1 -14 2031.37   75.88
  -1   1 -14 2103.43   76.40
  -1  -1  15  293.28   15.95
  -1  -1  15  267.70   13.96
   1  -1 -15  267.41   14.73
  -1   1 -15  274.51   16.06
  -1   1 -15  265.43   15.57
  -1   1 -16  450.97   24.20
  -1  -1  16  516.07   24.47
  -1  -1  16  485.58   21.88
   1  -1 -16  489.71   22.88
  -1   1 -16  513.86   23.74
  -1   1 -17  266.15   17.28
  -1  -1  17  290.42   17.62
   1  -1 -17  297.78   16.44
  -1   1 -17  309.44   17.01
   1  -1 -18  214.97   13.90
  -1   1 -18  211.43   15.07
  -1  -1  18  227.93   15.52
  -1   1 -18  211.00   13.71
  -1   1 -19  198.43   15.46
   1  -1 -19  241.10   14.89
  -1  -1  19  228.36   16.14
  -1   1 -19  215.50   13.82
   1  -1 -20  463.71   24.19
  -1   1 -20  553.95   25.50
   1  -1 -20  557.89   26.50
  -1  -1  20  531.23   28.46
   1  -1 -20  516.23   19.73
   1  -1 -21  384.43   21.46
   1  -1 -21  381.28   15.30
   1  -1 -22  311.89   12.07
   1  -1 -22  296.07   12.50
  -1  -1  22  284.52   12.01
   1  -1 -23  221.12    9.51
   1  -1 -23  231.09   10.22
  -1  -1  23  218.15    9.59
   1  -1 -24  313.70   12.60
   1  -1 -24  307.77   13.28
  -1  -1  24  309.83   12.71
   1  -1 -25   70.10    4.37
   1  -1 -25   69.54    5.04
  -1  -1  25   71.29    4.61
   1  -1 -26  359.27   14.25
   1  -1 -26  362.46   15.14
  -1  -1  26  345.90   14.40
   1   1  27  243.79   11.08
   1  -1 -27  246.19   10.69
   1  -1 -27  267.52   11.82
  -1  -1  27  253.15   11.09
   1  -1 -28  245.41   11.11
   1  -1 -28  285.88   12.49
  -1  -1  28  273.33   11.67
   1  -1 -29   78.57    5.93
  -1  -1  29   77.83    5.23
   1  -1 -30  257.64   11.83
  -1  -1  30  237.39   10.98
   1  -1 -31   56.42    5.29
  -1  -1  31   52.83    4.45
   1  -1 -32  526.14   21.42
   1  -1 -33  132.04    8.15
   1   1  33  138.66    9.02
   1   1  34  119.22    8.47
   1  -1 -34  117.48    7.72
   1  -1 -35   75.07    5.85
   1   1  35   77.29    6.90
   1   1  36  188.04   10.54
   1  -1 -36  192.40    9.96
   1  -1 -37   99.76    6.86
   1   1  37  105.10    7.54
   1   1  38  106.26    7.54
  -1  -1  38  100.33    5.89
   1  -1 -38  115.34    6.83
   1   1  39   60.19    5.64
   1  -1 -39   58.80    4.89
   1  -1 -40   61.81    4.73
   1   1  40   61.95    5.45
   1   1  41   30.33    3.93
   1   1  42   54.17    4.27
   1   1  43   16.71    2.74
   1   1  44   72.12    4.01
   1   1  45   17.43    1.59
  -1   2  44   26.19    1.87
  -1   2  43   11.73    1.86
  -1   2  42   79.91    4.49
   1  -2  42   67.44    3.86
   1  -2  41   10.91    2.34
   1  -2  40   45.91    3.97
   1  -2  39   18.83    3.37
   1  -2  38   18.71    3.51
   1  -2  37   42.84    4.57
   1  -2  36   87.55    6.42
  -1   2  36  100.60    6.55
   1  -2  35   29.55    4.48
  -1   2  35   36.79    4.67
   1  -2  34    8.85    3.59
   1   2 -34    9.66    3.50
  -1   2  34    5.59    3.60
   1  -2  33   23.76    3.98
  -1   2  33   26.15    4.36
   1   2 -33   24.60    4.22
   1  -2  32   17.75    4.16
  -1   2  32   21.61    4.08
   1   2 -32   14.51    3.77
   1  -2  31   85.51    6.44
   1   2 -31   83.87    6.34
  -1   2  31   89.90    6.46
   1   2 -30  311.49   14.11
   1  -2  30  309.67   14.07
  -1   2  30  320.25   14.15
   1  -2  29  101.49    6.61
   1   2 -29   94.79    6.42
  -1   2  29   88.74    6.36
   1  -2  28   55.63    5.09
   1   2 -28   60.53    5.19
  -1   2  28   62.76    5.30
   1  -2  27  490.95   19.14
   1   2 -27  453.41   19.00
  -1   2  27  457.95   18.95
   1  -2  26   12.18    3.09
   1   2 -26    8.57    2.95
  -1   2  26    9.39    2.89
   1  -2  25  249.40   11.58
   1   2 -25  259.02   11.59
   1  -2  24   18.10    3.09
   1   2 -24   19.57    2.91
   1   2 -23  336.75   14.32
   1   2 -23  399.16   15.30
   1  -2  23  393.18   15.45
   1   2 -22  101.23    5.45
   1   2 -22  124.95    6.34
   1  -2  22  114.93    6.42
   1   2 -21  228.10    9.93
   1  -2  21  227.05   10.02
   1   2 -21  172.52   15.45
   1   2 -20  573.65   21.19
   1   2 -20  566.47   25.24
  -1  -2 -20  543.43   24.70
   1   2 -20  579.01   30.00
  -1  -2 -20  499.35   27.31
  -1  -2 -19  969.18   38.99
   1   2 -19 1013.89   39.48
   1   2 -19  992.51   44.51
  -1  -2 -19  942.16   41.96
  -1   2  19 1038.10   43.21
   1   2 -18   66.97    6.22
  -1  -2 -18   78.26    8.11
  -1   2  18   94.15    8.76
   1   2 -18   76.20    9.12
  -1  -2 -18   77.01    6.50
  -1  -2 -17   28.31    3.88
   1   2 -17   29.78    4.06
  -1   2  17   24.20    4.69
   1   2 -17   32.77    6.57
  -1  -2 -16  872.34   34.81
   1   2 -16  921.88   35.17
   1   2 -16  901.03   39.68
  -1   2  16  894.48   36.97
  -1  -2 -15  835.27   33.88
   1   2 -15  899.89   34.20
   1   2 -15  883.14   38.64
  -1   2  15  929.74   35.99
  -1   2  14  604.05   26.10
  -1  -2 -14  611.03   24.73
   1   2 -14  622.76   28.93
   1   2 -14  624.24   24.87
  -1   2  13 2163.51   77.88
  -1  -2 -13 2140.73   76.77
   1   2 -13 2222.64   81.47
   1   2 -13 2210.42   76.74
  -1  -2 -12  674.74   26.47
  -1   2  12  680.19   27.31
   1   2 -12  675.23   26.33
   1   2 -12  722.24   30.65
  -1  -2 -11  278.59   12.50
  -1   2  11  275.05   13.28
   1   2 -11  273.25   12.37
   1   2 -11  278.86   15.92
  -1  -2 -10  738.92   28.47
   1   2 -10  755.42   28.29
   1   2 -10  802.26   32.14
   1   2  -9   98.07    8.43
   1   2  -9  102.41    5.79
  -1  -2  -9   96.21    5.93
   1   2  -8 1202.51   42.54
   1   2  -8 1228.35   45.82
  -1  -2  -8 1200.72   42.86
   1   2  -7 2018.91   68.96
   1   2  -7 1924.30   72.13
  -1  -2  -7 2023.81   69.35
  -1  -2  -7 2029.92   71.68
   1   2  -6 1378.97   47.38
   1   2  -6 1316.18   50.30
  -1  -2  -6 1396.20   50.09
  -1  -2  -6 1363.88   47.71
   1   2  -5 2975.50   95.72
  -1  -2  -5 2754.36   98.31
  -1  -2  -5 2836.08   95.82
   1   2  -4 4633.51  155.78
  -1  -2  -4 4768.51  158.63
  -1  -2  -4 4598.21  155.95
   1   2  -3   80.49    3.92
  -1  -2  -3   77.45    6.60
  -1  -2  -3   94.74    4.15
  -1   2   2 4408.81  150.45
  -1  -2  -2 4583.24  150.49
  -1  -2  -2 4502.04  153.69
  -1  -2  -1  674.59   26.66
  -1   2   1  688.13   24.49
  -1   2   0 4857.56  164.79
  -1  -2   0 4933.07  166.73
  -1  -2   1  715.32   27.89
  -1   2  -1  703.99   26.17
  -1  -2   2 4552.70  159.93
  -1   2  -2 4695.25  158.37
   1  -2  -2 4581.24  159.39
  -1  -2   2 4699.45  156.28
  -1   2  -3   66.46    6.01
  -1  -2   3   60.99    7.02
   1  -2  -3   63.17    6.26
  -1  -2   3   83.03    3.89
  -1  -2   4 4394.02  150.31
  -1   2  -4 4379.31  148.58
  -1  -2   4 4377.29  146.53
   1  -2  -4 4205.80  149.03
  -1  -2   5 2904.53  100.11
   1  -2  -5 2645.37   98.41
  -1  -2   5 2917.91   96.56
  -1   2  -5 2809.43   98.51
   1  -2  -6 1453.55   53.00
  -1   2  -6 1423.24   53.27
  -1  -2   6 1435.69   54.86
  -1  -2   6 1511.96   51.55
   1  -2  -7 1972.15   66.51
  -1  -2   7 1752.56   65.01
  -1   2  -7 1893.53   67.22
  -1  -2   7 1899.72   68.72
  -1  -2   8 1293.52   48.98
   1  -2  -8 1296.86   46.76
  -1   2  -8 1269.23   47.77
  -1  -2   8 1226.91   46.07
  -1  -2   9   89.63    8.54
   1  -2  -9   79.01    6.68
  -1   2  -9   85.40    7.75
  -1  -2   9   84.53    6.60
  -1  -2  10  688.60   29.12
   1  -2 -10  645.40   27.39
  -1   2 -10  673.71   28.82
  -1  -2  10  711.95   27.78
  -1   2 -10  688.20   29.92
   1  -2 -11  284.08   13.96
  -1  -2  11  274.12   15.09
  -1   2 -11  283.66   15.91
  -1   2 -11  274.74   16.48
   1  -2 -11  285.83   12.37
  -1  -2  11  295.62   14.84
   1  -2 -12  561.00   24.76
  -1  -2  12  609.20   26.04
  -1  -2  12  620.55   25.88
  -1   2 -12  580.50   26.80
  -1   2 -12  609.42   27.78
   1  -2 -12  576.57   23.18
   1  -2 -13 2082.58   78.01
  -1  -2  13 2088.27   79.09
  -1   2 -13 2162.11   80.78
  -1   2 -13 2252.96   81.37
  -1  -2  13 2230.55   79.70
   1  -2 -13 2223.25   76.68
  -1   2 -14  618.03   30.50
   1  -2 -14  703.69   28.52
  -1  -2  14  646.85   29.56
  -1   2 -14  731.76   31.37
  -1  -2  14  694.93   29.43
   1  -2 -14  679.80   27.36
   1  -2 -15  776.83   33.54
  -1  -2  15  811.95   34.34
  -1   2 -15  862.38   36.36
  -1   2 -15  814.45   36.61
  -1  -2  15  834.76   35.78
   1  -2 -15  858.92   32.99
  -1  -2  16  828.11   34.58
   1  -2 -16  814.09   33.98
  -1   2 -16  841.38   37.62
  -1  -2  16  858.96   36.53
  -1   2 -16  786.55   35.77
   1  -2 -16  827.52   33.45
  -1  -2  17   24.29    4.58
   1  -2 -17   23.58    4.42
  -1  -2  17   24.02    5.46
  -1   2 -17   26.95    5.51
   1  -2 -17   20.94    4.32
  -1   2 -17   22.72    5.53
   1  -2 -18   54.51    6.27
  -1  -2  18   57.47    6.53
   1  -2 -18   56.66    6.27
  -1   2 -18   63.47    7.53
  -1   2 -18   44.70    7.48
  -1  -2  18   57.11    7.98
   1  -2 -19 1041.03   42.25
  -1   2 -19  962.98   46.15
  -1  -2  19 1011.34   44.98
   1  -2 -19 1019.17   41.89
  -1   2 -19 1065.72   44.07
   1  -2 -20  572.16   21.35
  -1  -2  20  553.11   29.28
   1  -2 -20  538.12   26.54
   1  -2 -21  204.61    9.15
   1  -2 -21  231.27    9.94
   1  -2 -22  130.11    6.30
   1  -2 -22  141.73    6.99
   1   2  22  110.35    6.49
   1  -2 -23  346.87   13.87
   1  -2 -23  351.08   14.56
   1  -2 -24   13.56    2.19
   1  -2 -24   13.12    2.74
   1  -2 -25  233.32   10.10
   1  -2 -25  228.69   10.87
   1  -2 -26   16.46    2.48
   1  -2 -26   16.06    3.19
   1  -2 -27  488.68   18.87
   1  -2 -27  491.04   19.90
   1  -2 -28   62.33    4.25
   1  -2 -28   53.15    4.89
   1  -2 -29   79.18    4.97
   1  -2 -29   84.03    6.21
   1   2  30  312.77   13.55
   1  -2 -30  325.83   14.33
   1  -2 -31   94.21    6.81
   1  -2 -32   19.52    4.16
   1  -2 -33   25.09    4.15
   1   2  34    9.26    4.91
   1  -2 -34    3.38    3.52
   1  -2 -35   41.06    4.87
   1   2  35   39.36    6.07
   1   2  36   85.13    7.29
   1  -2 -36   85.51    6.35
   1   2  37   40.49    5.79
   1  -2 -37   38.48    4.64
   1   2  38   26.66    4.90
   1  -2 -38   26.37    4.14
   1   2  39   11.92    4.52
   1  -2 -39   12.60    3.37
   1  -2 -40   59.97    4.57
   1   2  40   58.92    5.30
   1   2  41   10.44    3.40
   1  -2 -41   10.50    2.57
   1   2  42   81.08    5.23
   1   2  43   15.13    2.61
   1   2  44   38.73    2.89
   1   2  45   15.95    1.54
  -1   3  44   35.92    2.24
  -1   3  43   70.34    3.92
  -1   3  42   33.10    3.20
   1  -3  40   20.71    2.35
   1  -3  39   32.54    3.18
   1  -3  38   17.07    2.90
   1  -3  37  115.41    6.64
  -1   3  37  120.82    7.28
   1  -3  36   10.60    3.23
  -1   3  36   11.44    4.00
   1  -3  35  255.16   11.95
  -1   3  35  279.09   12.62
   1  -3  34  315.80   14.04
  -1   3  34  328.55   14.54
   1  -3  33  271.99   12.78
  -1   3  33  296.25   13.42
   1  -3  32  305.95   13.99
  -1   3  32  332.20   14.55
   1  -3  31   20.35    3.84
  -1   3  31   18.37    4.36
   1  -3  30   63.74    5.35
   1   3 -30   63.63    5.32
  -1   3  30   54.61    5.52
   1  -3  29 1083.48   40.54
   1   3 -29 1080.68   40.96
  -1   3  29 1182.78   41.06
   1   3 -28  400.51   16.51
   1  -3  28  379.96   16.10
  -1   3  28  369.01   16.47
   1  -3  27  177.96    9.05
   1   3 -27  177.62    9.32
  -1   3  27  164.56    9.26
   1   3 -26  419.38   17.35
   1  -3  26  428.54   17.12
  -1   3  26  394.21   17.14
   1  -3  25   24.21    3.36
   1   3 -25   28.74    3.63
  -1  -3 -25   25.07    3.13
  -1  -3 -24  122.83    6.99
   1   3 -24  141.96    7.58
   1  -3  24  134.33    7.30
   1  -3  23  176.80    8.40
   1   3 -23  158.56    8.45
  -1  -3 -23  163.69    8.30
   1   3 -22   86.44    5.57
   1  -3  22   84.20    5.27
   1   3 -21 1378.12   47.66
   1  -3  21 1306.87   47.29
   1   3 -20  158.24   10.92
  -1  -3 -20  154.51   10.73
   1   3 -20  211.30    8.98
   1  -3  20  187.52    8.56
   1   3 -19   10.02    2.68
   1   3 -19    9.69    4.56
  -1  -3 -19    7.14    2.50
   1   3 -19   13.45    2.38
   1   3 -18  972.62   37.42
  -1  -3 -18  890.73   36.88
   1   3 -18 1006.94   44.17
  -1   3  18  935.72   39.96
  -1  -3 -17  822.70   33.32
   1   3 -17  848.10   33.74
   1   3 -17  906.48   40.17
  -1   3  17  841.62   36.08
  -1  -3 -16 1423.26   54.33
   1   3 -16 1552.17   61.29
   1   3 -16 1486.34   54.58
  -1   3  16 1523.61   57.02
  -1   3  15  862.31   35.68
   1   3 -15  877.90   33.91
   1   3 -15  922.51   40.32
  -1  -3 -15  872.57   33.76
  -1   3  14  137.81    9.49
   1   3 -14  155.24    8.67
   1   3 -14  159.99   12.64
  -1  -3 -14  150.47   10.60
  -1  -3 -14  153.47    8.59
  -1   3  13 1499.10   55.32
   1   3 -13 1474.25   53.75
  -1  -3 -13 1462.42   53.59
   1   3 -13 1611.08   60.05
  -1  -3 -13 1506.78   56.95
  -1   3  12 1481.92   53.45
   1   3 -12 1484.53   57.55
  -1  -3 -12 1443.75   51.81
   1   3 -12 1463.89   51.93
  -1  -3 -12 1352.83   54.79
  -1   3  11 1049.02   38.90
   1   3 -11 1021.98   37.41
   1   3 -11 1049.62   42.44
  -1  -3 -11 1000.74   37.33
   1   3 -10  510.61   19.38
  -1  -3 -10  484.36   19.26
  -1   3  10  496.45   20.92
   1   3 -10  490.25   23.57
   1   3  -9 1430.81   48.93
  -1  -3  -9 1357.20   48.86
  -1   3   9 1354.96   50.69
   1   3  -9 1441.75   53.81
   1   3  -8  495.04   19.64
  -1  -3  -8  550.49   19.73
   1   3  -8  529.69   23.96
   1   3  -7  144.84    6.73
  -1  -3  -7  161.52    6.87
  -1  -3  -7  116.91    9.33
  -1  -3  -6 2835.72   98.56
   1   3  -6 3010.76   98.53
  -1  -3  -6 2811.94  102.57
  -1  -3  -5  864.38   29.59
   1   3  -5  839.76   29.48
  -1  -3  -5  825.84   33.56
  -1  -3  -4 3582.47  118.58
   1   3  -4 3496.45  118.42
  -1  -3  -4 3458.02  122.58
  -1  -3  -3 2310.85   77.15
  -1  -3  -3 2275.78   81.80
  -1   3   3 2286.74   77.32
  -1  -3  -2 2358.69   85.99
  -1   3   2 2397.44   82.17
   1  -3   2 2517.51   83.62
  -1  -3  -1 4548.35  157.17
  -1   3   1 4537.33  154.11
   1  -3   1 4586.67  154.21
   1  -3   0   13.54    2.44
  -1  -3   0   13.41    5.01
  -1   3   0   16.40    3.65
  -1  -3   1 4623.65  158.07
   1  -3  -1 4561.46  153.88
  -1   3  -1 4558.65  156.12
  -1  -3   2 2588.71   92.20
  -1   3  -2 2568.00   90.21
  -1  -3   3 2294.91   82.80
   1  -3  -3 2304.66   80.75
  -1   3  -3 2242.03   80.82
  -1   3  -4 3514.49  117.96
   1  -3  -4 3460.40  117.54
  -1   3  -5  811.43   32.76
  -1  -3   5  789.38   34.07
   1  -3  -5  829.50   32.12
  -1   3  -6 3039.53  104.52
   1  -3  -6 2963.39  103.33
  -1  -3   6 2794.03  105.72
  -1   3  -7  171.96   11.47
   1  -3  -7  179.96   10.57
  -1  -3   7  157.38   12.52
  -1   3  -8  553.04   25.15
   1  -3  -8  552.19   23.44
   1   3   8  549.21   22.70
  -1  -3   8  544.00   25.81
  -1  -3   9 1389.88   54.60
  -1   3  -9 1435.71   54.17
   1  -3  -9 1326.29   51.71
   1   3   9 1431.25   51.50
  -1  -3  10  501.72   24.08
   1  -3 -10  473.99   17.13
  -1   3 -10  493.45   23.78
   1  -3 -10  508.67   21.77
   1   3  10  507.71   21.65
  -1   3 -11 1052.03   45.99
   1  -3 -11 1122.95   38.78
  -1   3 -11 1192.89   46.56
  -1  -3  11 1130.34   45.73
   1  -3 -11 1109.89   43.28
   1   3  11 1131.68   43.74
   1  -3 -12 1450.10   50.73
  -1   3 -12 1480.44   57.83
   1  -3 -12 1396.76   54.30
  -1  -3  12 1395.66   56.20
   1   3  12 1494.89   55.47
   1  -3 -12 1432.29   49.90
  -1   3 -12 1540.97   57.82
   1  -3 -13 1526.47   52.59
  -1   3 -13 1424.75   59.33
   1  -3 -13 1512.29   56.01
  -1   3 -13 1344.45   58.52
  -1  -3  13 1486.14   57.63
   1   3  13 1453.30   56.86
   1  -3 -13 1482.49   51.42
   1  -3 -14  142.80    8.00
   1  -3 -14  146.66    7.07
  -1   3 -14  131.09   12.12
   1  -3 -14  151.91   10.12
   1   3  14  144.46   11.05
  -1  -3  14  152.64   11.17
  -1   3 -14  135.74   11.69
   1  -3 -15  810.74   28.98
  -1   3 -15  856.71   36.64
   1  -3 -15  718.03   31.34
   1   3  15  781.52   33.68
   1  -3 -15  643.30   26.86
  -1  -3  15  818.36   33.33
  -1   3 -15  732.09   34.02
   1  -3 -16 1468.62   52.44
  -1   3 -16 1284.68   58.67
   1  -3 -16 1472.46   50.54
   1  -3 -16 1393.16   54.95
  -1   3 -16 1255.07   56.61
  -1  -3  16 1451.39   56.44
  -1  -3  17  870.10   36.73
  -1   3 -17  851.97   40.19
   1  -3 -17  780.21   34.79
   1  -3 -17  816.08   31.00
   1  -3 -17  847.64   33.09
  -1   3 -18  915.64   43.46
   1  -3 -18  861.71   37.96
  -1  -3  18  936.68   39.36
   1  -3 -18  903.77   33.84
   1  -3 -18  902.04   36.03
  -1  -3  19   10.81    3.59
   1  -3 -19   10.58    2.27
   1   3  19   10.79    2.18
   1  -3 -20  159.85    7.76
   1  -3 -20  186.35    8.53
   1   3  20  174.22    8.21
   1  -3 -21 1298.59   46.63
   1  -3 -21 1358.73   47.35
   1   3  21 1339.50   47.09
   1  -3 -22   83.88    4.91
   1  -3 -22   84.49    5.50
   1   3  22   85.31    5.42
   1  -3 -23  183.41    7.86
   1  -3 -23  150.98    8.13
   1   3  23  137.84    7.87
   1  -3 -24  135.93    6.92
   1  -3 -24  138.08    7.65
   1  -3 -25   39.71    3.46
   1  -3 -25   42.37    4.26
   1  -3 -26  408.94   16.37
   1  -3 -26  419.01   17.27
   1  -3 -27  177.98    8.55
   1  -3 -27  185.97    9.59
   1  -3 -28  350.41   14.47
   1  -3 -28  362.33   15.71
   1  -3 -29 1117.23   39.91
   1  -3 -29 1109.57   41.10
   1  -3 -30   50.63    4.01
   1  -3 -30   58.73    5.51
   1  -3 -31   26.39    3.08
   1  -3 -31   28.88    4.30
   1   3  32  313.41   13.55
   1  -3 -32  320.19   14.49
   1  -3 -33  267.94   12.78
   1  -3 -34  354.43   15.54
   1   3  35  297.51   14.45
   1  -3 -35  298.49   13.58
   1   3  36   19.53    5.57
   1  -3 -36   13.99    3.90
   1  -3 -37  111.65    7.18
   1   3  37  120.73    8.12
   1   3  38   15.42    4.73
   1  -3 -38   15.20    3.68
   1   3  39   42.05    5.28
   1  -3 -39   44.59    4.33
   1  -3 -40   28.61    3.51
   1   3  40   26.76    4.33
   1   3  41   37.12    4.04
   1  -3 -41   36.27    3.46
   1   3  42   33.87    3.59
   1  -3 -42   31.30    2.90
   1   3  43   80.05    4.62
   1   3  44   50.59    3.17
   1   3  45   22.55    1.65
  -1   4  44    5.72    1.06
  -1   4  43    4.16    1.68
  -1   4  37   41.95    4.76
  -1   4  36   15.38    4.33
   1  -4  35  173.01    8.63
  -1   4  35  198.44   10.06
   1  -4  34   86.43    5.68
  -1   4  34   94.06    6.91
   1  -4  33  153.21    8.19
  -1   4  33  166.73    9.32
  -1  -4 -32  288.42   12.72
   1  -4  32  291.27   12.99
  -1   4  32  326.09   14.17
   1  -4  31   95.81    6.15
  -1  -4 -31   88.86    5.80
  -1   4  31   94.21    7.16
  -1  -4 -30   50.86    4.35
   1  -4  30   49.91    4.64
  -1   4  30   52.10    5.52
   1  -4  29   44.50    4.34
  -1  -4 -29   42.89    4.11
  -1   4  29   44.78    5.21
   1  -4  28  166.90    8.60
  -1  -4 -28  162.47    8.62
  -1   4  28  169.23    9.41
  -1  -4 -27   59.64    4.87
   1  -4  27   57.83    4.78
  -1   4  27   62.29    5.68
   1  -4  26   71.72    5.21
  -1  -4 -26   76.68    5.51
  -1  -4 -25  282.19   12.58
   1  -4  25  268.81   12.08
   1  -4  24  197.16    9.48
  -1  -4 -24  203.17   10.02
   1  -4  23   56.50    4.28
  -1  -4 -23   56.89    4.77
   1  -4  22   50.17    3.99
  -1  -4 -22   54.62    4.74
   1  -4  21   27.00    2.94
  -1  -4 -21   25.66    3.50
   1   4 -20  562.88   25.79
   1  -4  20  590.81   22.11
  -1  -4 -20  600.49   23.17
   1   4 -19  177.09   10.93
  -1  -4 -19  184.09    9.25
   1   4 -18    9.84    2.39
  -1  -4 -18    7.19    3.27
   1   4 -17  724.05   29.06
  -1  -4 -17  700.70   29.10
   1   4 -17  722.96   35.51
  -1  -4 -17  701.48   32.44
  -1   4  17  694.47   31.44
  -1   4  16    1.54    2.56
   1   4 -16    1.40    1.44
  -1  -4 -16    2.76    1.99
   1   4 -16    1.25    3.41
  -1  -4 -16   -1.80    3.00
  -1   4  15   70.57    6.96
   1   4 -15   85.73    6.14
  -1  -4 -15   87.63    6.38
   1   4 -15   81.79    9.50
  -1  -4 -15   80.04    8.05
   1   4 -14  357.45   15.53
  -1  -4 -14  348.44   15.67
   1   4 -14  340.28   20.45
  -1  -4 -14  316.74   18.21
   1   4 -13  143.13    7.80
  -1  -4 -13  125.22    7.69
   1   4 -13  129.82   11.45
  -1  -4 -13  127.39   10.12
   1   4 -12   86.56    5.59
  -1  -4 -12   77.75    5.56
   1   4 -12   79.19    8.87
  -1  -4 -12   86.37    8.13
   1   4 -11  671.78   26.81
  -1  -4 -11  738.85   27.40
   1   4 -11  715.38   32.56
  -1  -4 -11  769.19   31.50
   1   4 -10 1043.17   38.07
  -1  -4 -10 1100.47   38.62
   1   4 -10  973.02   43.04
  -1  -4 -10 1089.90   42.94
   1   4  -9  196.44    8.86
  -1  -4  -9  199.13    9.26
  -1  -4  -9  193.95   12.28
   1   4  -8  345.08   14.74
  -1  -4  -8  432.86   15.54
   1  -4   8  405.98   18.27
   1   4  -7  635.35   22.98
  -1  -4  -7  637.36   23.41
   1  -4   7  641.41   26.37
   1   4  -6 3531.76  118.21
  -1  -4  -6 3478.78  118.71
   1  -4   6 3493.53  121.99
   1   4  -5  372.56   19.85
   1   4  -5  432.28   15.02
  -1  -4  -5  413.22   15.46
   1  -4   5  425.72   18.59
   1   4  -4 4276.79  141.98
   1   4  -4 3988.68  135.20
   1  -4   4 4501.84  139.79
  -1  -4  -3 1376.49   52.62
   1  -4   3 1396.58   50.16
  -1   4   3 1375.63   47.75
  -1   4   2  418.81   16.59
   1  -4   2  455.63   18.21
  -1  -4  -2  440.71   20.94
  -1   4   1  631.37   21.92
  -1  -4  -1  584.67   25.73
  -1   4   0  353.66   15.17
  -1  -4   0  323.74   18.10
   1  -4   0  363.28   14.93
  -1  -4   1  619.28   28.65
  -1   4  -1  619.54   25.83
   1  -4  -1  659.92   24.18
  -1  -4   2  436.71   21.47
  -1   4  -2  408.70   18.60
   1  -4  -2  406.53   16.18
  -1  -4   3 1379.30   55.55
  -1   4  -3 1347.38   53.02
   1  -4  -3 1468.88   49.72
   1  -4  -4 4719.91  157.50
  -1  -4   4 4616.42  164.50
  -1   4  -4 4550.80  162.19
  -1  -4   5  421.96   22.20
   1  -4  -5  411.91   15.30
   1  -4  -5  408.82   19.45
  -1   4  -5  429.70   20.52
   1   4   6 3689.44  123.60
   1  -4  -6 3616.37  121.74
   1  -4  -6 3505.06  126.83
  -1  -4   6 3665.54  130.34
  -1   4  -6 3551.15  128.75
   1   4   7  589.24   22.40
   1  -4  -7  626.90   25.17
   1  -4  -7  531.21   19.50
  -1  -4   7  589.86   28.31
  -1   4  -7  628.66   27.20
   1  -4  -8  426.59   19.89
   1   4   8  404.30   17.92
  -1   4  -8  418.60   21.90
  -1  -4   8  409.17   22.57
  -1  -4   9  213.40   15.21
   1  -4  -9  230.24   12.96
   1   4   9  232.25   11.75
   1  -4  -9  204.62    8.04
  -1   4  -9  231.84   15.19
  -1  -4  10  964.26   41.75
   1  -4 -10  924.12   32.95
   1  -4 -10 1023.46   38.86
   1   4  10 1003.49   37.61
  -1   4 -10 1004.84   41.91
  -1  -4  11  777.51   35.03
   1  -4 -11  792.09   32.32
   1  -4 -11  752.55   26.96
   1   4  11  770.69   31.71
  -1   4 -11  776.61   35.68
   1  -4 -12   95.27    4.83
   1  -4 -12   90.69    4.70
  -1  -4  12   93.59    9.58
   1  -4 -12   92.76    8.11
   1   4  12   81.53    7.73
  -1   4 -12   98.90   10.52
   1  -4 -13  138.62    6.44
   1  -4 -13  138.57    6.74
   1  -4 -13  132.50   10.16
  -1  -4  13  134.07   11.68
   1   4  13  140.22   10.51
  -1   4 -13  129.30   12.15
  -1   4 -13  154.00   13.51
   1  -4 -14  297.74   12.47
   1  -4 -14  282.37   11.87
   1  -4 -14  308.85   16.68
  -1  -4  14  305.29   18.36
   1   4  14  303.40   17.30
  -1   4 -14  255.06   17.94
  -1   4 -14  319.45   20.42
   1  -4 -15   73.66    5.08
   1  -4 -15   73.63    4.47
   1  -4 -15   72.28    7.54
  -1  -4  15   73.37    8.34
   1   4  15   75.02    8.12
  -1   4 -15   84.24    9.52
  -1   4 -15   80.56   10.43
   1   4  16    0.73    3.08
   1  -4 -16    1.55    1.19
  -1   4 -16    4.09    4.69
  -1   4 -16    2.10    3.68
  -1  -4  16    4.22    3.66
   1  -4 -16    1.08    2.70
   1  -4 -16    1.98    1.76
   1   4  17  723.87   33.93
  -1   4 -17  717.18   34.96
  -1   4 -17  723.52   37.75
  -1  -4  17  708.33   33.71
   1  -4 -18    3.42    1.62
   1   4  18    5.60    1.92
   1  -4 -19  175.42    8.03
   1  -4 -19  156.09    8.47
   1   4  19  186.31    8.35
   1  -4 -20  637.99   24.08
   1  -4 -20  655.99   24.82
   1   4  20  656.89   24.40
   1  -4 -21   24.99    2.84
   1  -4 -21   33.01    3.67
   1   4  21   26.85    3.32
   1  -4 -22   40.13    3.47
   1  -4 -22   38.37    4.07
   1   4  22   42.06    3.81
   1  -4 -23   42.14    3.72
   1  -4 -23   52.27    4.52
   1   4  23   47.40    4.18
   1  -4 -24  223.33   10.15
   1  -4 -24  237.22   11.06
   1   4  24  226.63   10.69
   1  -4 -25  272.52   11.77
   1  -4 -25  267.41   12.55
   1  -4 -26   72.37    4.87
   1  -4 -26   61.96    5.52
   1  -4 -27   78.08    5.12
   1  -4 -27   68.51    5.88
   1  -4 -28  196.54    9.15
   1  -4 -28  183.82   10.06
   1  -4 -29   56.29    4.26
   1  -4 -29   45.77    5.32
   1  -4 -30   43.73    3.85
   1  -4 -30   42.83    4.88
   1  -4 -31  103.80    5.95
   1  -4 -31   97.30    7.14
   1  -4 -32  263.10   11.57
   1  -4 -32  292.92   13.23
   1  -4 -33  163.11    9.17
   1   4  34  107.19    6.35
   1  -4 -34  118.33    7.61
   1  -4 -35  175.51    9.55
   1  -4 -36   18.99    4.21
   1   4  37   34.89    5.22
   1  -4 -37   42.43    4.54
   1   4  38    4.55    4.13
   1  -4 -38    3.41    3.21
   1   4  39   20.41    4.15
   1  -4 -39   20.83    3.40
   1   4  40   83.96    5.70
   1  -4 -40   86.30    5.25
   1  -4 -41   35.13    3.28
   1   4  41   37.50    3.84
   1   4  42   12.73    2.60
   1  -4 -42   10.63    1.91
   1   4  43    6.62    1.91
   1   4  44    7.13    1.38
  -1   5  43    3.59    1.31
  -1   5  42   54.19    3.50
  -1   5  37    9.15    3.67
  -1   5  36  101.75    7.08
  -1  -5 -35   74.19    4.73
  -1   5  35   82.50    6.57
  -1  -5 -34   82.90    5.22
  -1   5  34   87.09    6.91
  -1  -5 -33   73.82    5.16
  -1   5  33   78.99    6.53
  -1  -5 -32  179.46    9.12
  -1   5  32  199.86   10.22
  -1  -5 -31   49.78    4.55
  -1   5  31   57.20    5.85
  -1  -5 -30   60.24    5.00
  -1   5  30   68.14    6.22
  -1  -5 -29  364.29   15.92
  -1   5  29  386.61   16.63
  -1  -5 -28  198.32   10.14
  -1   5  28  198.75   10.50
  -1  -5 -27  371.72   16.33
  -1   5  27  383.35   16.57
  -1  -5 -26   55.41    5.14
  -1  -5 -25  136.40    8.17
  -1  -5 -24    2.35    2.96
  -1  -5 -23  104.53    7.15
  -1  -5 -22  717.61   27.99
  -1  -5 -21   43.78    4.74
  -1  -5 -20  141.20    8.24
  -1  -5 -19  159.71    8.92
  -1  -5 -18  111.23    7.12
   1   5 -17  645.32   27.37
  -1  -5 -17  677.61   25.99
   1   5 -16  210.30   10.78
  -1  -5 -16  200.41   14.01
  -1  -5 -16  162.23    9.22
  -1   5  15  303.05   16.52
   1   5 -15  292.26   14.05
   1   5 -15  297.59   19.68
  -1  -5 -15  311.46   18.16
  -1   5  14  713.04   30.04
   1   5 -14  660.13   27.05
   1   5 -14  713.99   34.28
  -1  -5 -14  723.46   32.39
   1   5 -13   20.11    2.69
  -1  -5 -13   24.73    5.05
  -1   5  13   19.59    3.75
   1   5 -13   16.99    5.31
  -1  -5 -12  308.41   17.72
   1   5 -12  295.05   13.14
  -1   5  12  309.54   15.53
   1   5 -12  291.13   18.50
  -1  -5 -12  291.91   13.73
  -1  -5 -11  112.32    9.73
   1   5 -11   97.57    5.99
  -1   5  11  121.77    8.32
  -1  -5 -11  109.38    6.74
  -1  -5 -10   56.89    6.86
   1   5 -10   46.65    3.65
  -1   5  10   56.22    5.56
  -1  -5 -10   54.40    4.38
   1  -5  10   58.01    6.45
  -1  -5  -9 2456.41   81.37
  -1   5   9 2435.19   78.10
  -1  -5  -9 2387.39   75.32
   1  -5   9 2178.52   79.10
   1   5  -8  620.91   24.28
  -1  -5  -8  726.50   30.88
   1   5  -8  614.57   30.15
  -1   5   8  735.13   28.05
  -1  -5  -8  695.42   25.28
   1  -5   8  743.76   29.39
   1   5  -7  998.18   35.48
  -1  -5  -7 1025.52   41.95
   1   5  -7 1015.84   42.30
  -1   5   7 1083.75   39.63
   1  -5   7  986.90   39.94
  -1  -5  -7 1026.62   36.40
   1   5  -6  339.03   12.16
   1   5  -6  345.04   18.33
  -1  -5  -6  340.96   18.25
  -1   5   6  343.36   16.11
   1  -5   6  320.81   16.32
   1   5  -6  313.50   12.62
  -1  -5  -6  319.35   12.81
   1   5  -5  435.09   21.82
   1   5  -5  434.73   15.37
  -1  -5  -5  416.21   21.82
   1  -5   5  467.37   20.48
  -1   5   5  486.98   20.18
   1   5  -4  488.75   24.65
   1  -5   4  549.34   23.30
  -1   5   4  556.91   23.24
  -1   5   3  500.96   21.96
  -1   5   3  491.42   19.44
   1   5  -3  497.04   23.85
   1  -5   3  551.88   22.25
  -1   5   2  280.13   14.49
   1  -5   2  303.68   14.25
   1   5  -2  289.87   15.70
  -1   5   2  269.09   12.32
  -1   5   1  769.09   29.37
  -1   5   1  761.43   31.29
   1  -5   1  790.44   30.36
   1   5  -1  766.44   32.76
  -1   5   0 1868.28   66.63
  -1   5   0 1844.29   68.10
   1  -5   0 1951.65   66.84
   1   5   0 1964.31   69.54
  -1   5  -1  765.03   29.99
  -1   5  -1  767.79   31.06
  -1  -5   1  735.77   34.05
   1  -5  -1  729.14   28.97
   1   5   1  760.96   31.78
  -1   5  -2  271.81   13.86
   1  -5  -2  228.78   11.70
  -1   5  -2  267.41   14.39
  -1  -5   2  260.86   16.83
   1   5   2  257.18   14.40
   1   5   3  512.21   22.91
  -1   5  -3  499.87   22.67
   1  -5  -3  466.95   19.54
  -1   5  -3  505.97   22.90
  -1  -5   3  470.50   25.07
   1  -5  -4  612.07   24.00
  -1   5  -4  628.96   28.06
  -1  -5   4  628.37   30.50
  -1   5  -4  660.71   28.02
  -1   5  -5  482.28   22.23
   1  -5  -5  451.50   18.14
  -1   5  -5  467.31   22.58
  -1  -5   5  448.70   24.68
   1   5   5  454.68   17.16
   1  -5  -6  306.30   12.55
  -1   5  -6  298.43   17.21
  -1  -5   6  278.02   18.54
   1   5   6  283.56   12.44
   1  -5  -7 1052.10   37.85
   1  -5  -7 1045.25   42.41
  -1   5  -7 1114.48   44.78
   1   5   7 1028.71   38.86
  -1  -5   7 1169.98   47.25
   1  -5  -8  733.28   25.95
   1  -5  -8  719.01   30.96
  -1   5  -8  745.07   33.25
   1   5   8  628.17   27.49
  -1  -5   8  763.83   34.95
  -1  -5   9 2255.81   85.74
  -1   5  -9 2363.07   85.17
   1  -5  -9 2401.66   82.43
   1  -5  -9 2208.67   75.74
  -1  -5  10   74.35    9.20
   1  -5 -10   64.02    3.40
   1  -5 -10   75.42    7.64
  -1   5 -10   74.80    9.17
   1   5  10   68.64    6.30
   1  -5 -10   68.39    3.97
  -1  -5  11  103.23   10.83
  -1   5 -11  110.61   11.30
   1  -5 -11  121.82    9.72
  -1   5 -11   98.78   10.23
   1  -5 -11  107.06    5.20
   1   5  11   96.88    7.94
   1  -5 -11   93.28    4.60
  -1  -5  12  318.97   19.38
  -1   5 -12  274.62   19.13
   1  -5 -12  302.55   16.70
   1  -5 -12  253.14   10.45
   1  -5 -12  277.16   10.95
  -1   5 -12  266.46   17.83
   1   5  12  297.08   15.49
  -1  -5  13   28.48    6.24
   1  -5 -13   23.10    2.01
   1  -5 -13   22.46    2.14
   1   5  13   19.28    4.30
  -1   5 -13   23.60    5.66
   1  -5 -13   24.11    4.89
  -1   5 -13   26.79    6.69
   1  -5 -14  574.66   22.35
   1  -5 -14  583.76   22.41
   1  -5 -14  730.10   30.41
  -1  -5  14  730.82   32.83
  -1   5 -14  640.04   33.60
   1   5  14  714.98   29.51
  -1   5 -14  743.25   33.72
   1   5  15  325.13   18.16
   1  -5 -15  331.26   18.44
  -1  -5  15  282.82   19.01
  -1   5 -15  305.80   21.72
  -1   5 -15  308.49   20.27
   1  -5 -15  286.94   12.32
   1  -5 -15  313.09   13.25
   1   5  16  159.55   12.29
   1  -5 -16  171.36    7.87
   1  -5 -16  155.47    8.34
   1   5  17  643.93   31.59
   1  -5 -17  655.49   24.42
   1  -5 -17  612.69   25.08
   1   5  17  696.96   24.42
   1   5  18  129.62   11.93
   1  -5 -18  134.82    7.01
   1   5  18  146.47    7.06
   1  -5 -19  168.33    8.09
   1   5  19  169.44    8.17
   1  -5 -20  159.86    8.11
   1   5  20  173.42    8.23
   1  -5 -21   34.99    3.45
   1  -5 -21   31.45    4.03
   1   5  21   35.81    3.63
   1  -5 -22  736.26   26.90
   1  -5 -22  698.30   27.63
   1   5  22  722.76   27.09
   1  -5 -23   94.52    5.77
   1  -5 -23   84.39    6.36
   1   5  23   87.98    5.90
   1  -5 -24    2.82    2.34
   1  -5 -24    4.68    2.98
   1   5  24    3.51    2.77
   1  -5 -25  145.20    7.43
   1  -5 -25  131.25    8.15
   1  -5 -26   46.07    4.10
   1  -5 -26   38.56    4.91
   1  -5 -27  363.01   15.17
   1  -5 -27  369.17   16.25
   1  -5 -28  198.06    9.55
   1  -5 -28  211.54   10.91
   1  -5 -29  409.10   16.30
   1  -5 -29  384.97   17.45
   1  -5 -30   48.60    4.15
   1  -5 -30   58.55    5.85
   1  -5 -31   54.57    4.37
   1  -5 -31   68.34    6.05
   1  -5 -32  186.29    8.70
   1  -5 -32  183.37   10.19
   1  -5 -33   66.68    6.13
   1  -5 -34   95.97    6.93
   1   5  35   74.69    4.90
   1  -5 -35   80.05    6.27
   1   5  35   67.25    6.60
   1  -5 -36  121.08    7.34
   1  -5 -37   15.20    3.61
   1  -5 -38   31.39    3.82
   1  -5 -39   51.56    4.24
   1  -5 -40   23.67    2.97
   1  -5 -41  111.34    5.47
   1  -5 -42   37.31    2.62
  -1   6  42    5.14    1.44
  -1  -6 -36    6.05    1.97
  -1   6  36    5.63    3.62
  -1   6  35    2.64    3.76
  -1  -6 -35    4.08    2.03
  -1   6  34    1.76    4.36
  -1  -6 -34    3.74    2.30
  -1  -6 -33   86.02    5.51
  -1   6  33   81.18    6.83
  -1   6  32    7.88    4.32
  -1  -6 -32   10.68    3.17
  -1  -6 -31   80.15    5.82
  -1  -6 -30   78.58    5.84
  -1  -6 -29   10.22    3.45
  -1  -6 -28   34.57    4.59
  -1  -6 -27   42.91    4.97
  -1  -6 -26  697.87   27.64
  -1  -6 -25  189.48   10.44
  -1  -6 -24   16.47    4.00
  -1  -6 -23   10.39    3.98
  -1  -6 -22  187.80   10.46
  -1  -6 -21  241.44   12.34
  -1  -6 -20  200.21   10.98
  -1  -6 -19  248.57   12.48
  -1  -6 -18   88.05    6.79
  -1  -6 -17   50.12    5.21
  -1  -6 -16   55.18    5.25
  -1  -6 -15  529.47   21.64
  -1  -6 -14  128.57    7.81
  -1  -6 -13  196.92   14.22
  -1  -6 -13  169.53    9.16
   1   6 -12  256.51   12.38
  -1   6  12  313.87   15.92
  -1  -6 -12  301.45   18.30
  -1  -6 -12  311.09   13.22
   1   6 -11  367.86   15.52
  -1   6  11  410.07   19.13
  -1  -6 -11  403.72   22.07
   1  -6  11  389.40   20.75
   1   6 -10  683.23   25.82
  -1   6  10  758.69   29.99
   1   6 -10  665.16   33.44
  -1  -6 -10  758.42   33.75
   1  -6  10  667.55   31.05
   1   6  -9  163.98    7.59
   1   6  -9  170.14   13.06
  -1   6   9  177.93   10.87
  -1  -6  -9  177.77   13.26
   1  -6   9  178.49   11.83
   1   6  -8    6.87    3.90
  -1  -6  -8    4.40    3.73
   1   6  -8    6.92    1.18
  -1   6   8    4.54    2.46
   1   6  -8    7.80    1.71
   1  -6   8    4.84    2.99
   1   6  -7  570.64   20.65
   1   6  -7  635.21   28.79
  -1   6   7  633.83   25.61
  -1  -6  -7  640.78   29.61
   1  -6   7  587.62   26.56
   1   6  -7  562.54   21.10
   1   6  -6   16.27    1.17
   1   6  -6   20.22    4.61
  -1  -6  -6   25.30    5.91
  -1   6   6   22.01    3.88
   1  -6   6   17.36    4.17
   1   6  -5    7.08    4.06
   1  -6   5    4.54    2.89
  -1  -6  -5    7.24    4.34
  -1   6   5    5.56    2.67
   1  -6   4  286.93   15.51
  -1   6   4  302.45   15.37
  -1  -6  -4  287.53   18.18
   1   6  -4  288.64   16.99
  -1   6   3 1237.77   47.23
  -1  -6  -3 1230.86   51.71
  -1   6   3 1253.47   44.67
   1  -6   3 1165.71   47.34
   1   6  -3 1225.85   49.65
  -1   6   2  869.83   35.74
  -1  -6  -2  923.17   41.00
   1  -6   2  844.58   35.72
  -1   6   2  892.93   33.77
   1   6  -2  957.15   38.40
  -1   6   1  263.88   14.66
  -1  -6  -1  263.60   18.00
   1  -6   1  282.64   14.35
   1   6  -1  269.60   16.08
  -1   6   1  268.48   13.06
  -1   6   0   71.50    6.00
  -1   6   0   66.15    6.56
   1  -6   0   66.15    6.03
   1   6   0   67.31    7.39
  -1   6  -1  239.53   12.97
  -1   6  -1  238.65   13.80
   1  -6  -1  241.01   12.53
   1   6   1  237.66   14.73
  -1   6  -2  917.82   36.40
  -1   6  -2  932.12   37.36
   1  -6  -2  869.44   34.88
   1   6   2  905.65   38.11
  -1   6  -3 1304.53   50.11
  -1   6  -3 1304.34   50.69
   1  -6  -3 1273.85   47.69
  -1   6  -4  313.29   17.12
   1  -6  -4  306.60   14.26
  -1   6  -4  321.00   17.25
  -1  -6   4  261.09   19.47
  -1  -6   5   15.26    6.05
  -1   6  -5   18.07    4.76
  -1   6  -5   17.73    4.57
   1  -6  -5   18.50    3.03
  -1  -6   6   19.09    5.92
   1  -6  -6   18.97    2.95
  -1   6  -6   14.39    4.46
   1   6   6   16.90    2.14
  -1   6  -6   23.17    5.04
   1  -6  -7  543.78   22.25
  -1   6  -7  609.73   29.02
  -1   6  -7  646.99   28.15
   1   6   7  541.97   21.80
  -1  -6   7  562.25   30.63
  -1  -6   8    4.21    5.52
   1   6   8    5.01    2.31
  -1   6  -8    7.62    4.53
  -1   6  -8    5.97    3.74
   1  -6  -8    6.02    1.85
  -1  -6   9  164.27   14.45
   1  -6  -9  138.14    7.42
  -1   6  -9  163.37   13.36
   1  -6  -9  158.79   11.62
   1   6   9  138.87    8.67
   1  -6 -10  650.96   25.48
  -1  -6  10  760.79   36.38
   1  -6 -10  731.03   32.21
  -1   6 -10  779.38   35.39
   1   6  10  688.86   28.30
  -1  -6  11  461.10   26.23
   1  -6 -11  471.32   23.10
  -1   6 -11  494.23   26.23
   1   6  11  420.46   19.82
   1  -6 -11  411.09   16.27
   1  -6 -12  303.99   17.84
  -1   6 -12  317.21   20.95
  -1   6 -12  264.88   18.79
   1   6  12  283.75   15.40
   1  -6 -12  288.81   11.73
   1  -6 -12  274.19   12.52
   1  -6 -12  276.33   11.47
  -1   6 -13  205.62   16.76
   1  -6 -13  197.09    8.55
   1  -6 -13  180.97    8.24
   1  -6 -13  167.95    9.20
   1  -6 -14  124.50    6.66
   1  -6 -14  136.03    7.62
   1  -6 -15  524.69   19.87
   1  -6 -15  507.43   20.83
   1  -6 -16   48.91    3.98
   1   6  16   52.68    3.64
   1  -6 -16   50.23    4.65
   1  -6 -17   58.28    4.24
   1  -6 -17   44.65    4.71
   1   6  17   53.21    3.82
   1  -6 -18  100.81    5.83
   1  -6 -18   92.25    6.48
   1   6  18   92.35    5.45
   1  -6 -19  244.44   11.12
   1   6  19  259.59   11.03
   1  -6 -20  210.44    9.61
   1   6  20  189.64    9.29
   1  -6 -21  224.64   10.33
   1   6  21  220.57   10.26
   1  -6 -22  169.50    8.90
   1   6  22  189.33    8.97
   1  -6 -23   10.88    2.69
   1  -6 -23   14.22    3.92
   1   6  23   13.14    3.00
   1  -6 -24   15.63    2.97
   1  -6 -24   15.73    3.92
   1  -6 -25  181.04    9.18
   1  -6 -25  192.51   10.25
   1  -6 -26  691.79   26.41
   1  -6 -26  712.44   27.51
   1  -6 -27   55.21    4.60
   1  -6 -27   49.88    5.58
   1  -6 -28   28.56    3.60
   1  -6 -28   33.80    4.91
   1  -6 -29   13.42    3.06
   1  -6 -29    7.34    4.11
   1  -6 -30   72.74    4.96
   1  -6 -30   69.03    6.32
   1  -6 -31   77.98    5.11
   1  -6 -31   82.52    6.60
   1  -6 -32    9.60    2.40
   1  -6 -32    7.48    4.36
   1  -6 -33  107.90    5.67
   1  -6 -33   92.55    7.24
   1   6  34    1.90    3.62
   1  -6 -34    3.29    3.86
   1   6  35    8.33    2.80
   1   6  35   11.32    4.00
   1  -6 -35    9.00    3.81
   1   6  36    3.33    2.14
   1   6  36    8.90    3.63
   1  -6 -36    6.11    3.34
   1   6  37  152.92    8.13
   1  -6 -37  162.82    8.15
   1  -6 -38   26.25    3.44
   1   6  38   25.77    3.48
   1   6  39  103.30    5.69
   1  -6 -39  101.99    5.63
   1  -6 -40   46.88    3.36
   1   6  40   46.31    3.49
   1  -6 -41   71.63    3.80
   1   6  41   72.85    3.97
   1   6  42    5.04    1.25
   1  -6 -42    3.88    1.05
  -1  -7 -36   37.04    2.85
  -1  -7 -35   30.39    3.01
  -1  -7 -34   13.80    2.76
  -1  -7 -33   82.06    5.40
  -1  -7 -32   54.79    4.60
  -1  -7 -31  100.13    6.55
  -1  -7 -30  251.36   11.68
  -1   7  30  232.45   11.75
  -1  -7 -29  220.28   11.18
  -1   7  29  218.09   11.04
  -1  -7 -28   56.17    5.81
  -1   7  28   56.37    5.60
  -1  -7 -27   11.41    4.17
  -1   7  27   13.49    4.24
  -1  -7 -26  396.28   17.80
  -1   7  26  402.80   17.16
  -1   7  25  139.20    8.54
  -1  -7 -25  156.79    9.37
  -1  -7 -24  292.72   14.43
  -1  -7 -23  140.85    9.31
  -1  -7 -22  159.75   10.04
  -1  -7 -21   75.64    6.77
  -1  -7 -20   84.35    7.20
  -1  -7 -19    7.82    4.35
  -1  -7 -18  266.04   13.51
  -1  -7 -17  349.23   16.31
  -1  -7 -16   70.37    4.55
  -1  -7 -16   60.89    6.10
  -1  -7 -15   25.56    2.92
  -1  -7 -15   20.81    4.33
  -1  -7 -14  187.64    8.82
  -1  -7 -14  192.35   10.48
  -1  -7 -13   72.46    4.85
  -1  -7 -13   92.60    6.59
  -1  -7 -12  177.23    8.27
  -1  -7 -12  164.64    9.29
   1  -7  12  166.98    6.91
  -1  -7 -11    6.91    2.04
   1  -7  11    6.80    1.23
  -1  -7 -11    0.94    2.71
   1  -7  10  504.88   25.68
  -1  -7 -10  523.40   19.86
   1  -7  10  506.81   18.50
  -1  -7 -10  530.67   20.95
  -1   7   9  512.66   24.48
   1  -7   9  526.33   26.43
  -1  -7  -9  560.62   21.00
   1  -7   9  551.81   19.58
  -1   7   8  327.00   16.64
  -1  -7  -8  344.17   21.16
   1  -7   8  317.36   18.00
  -1  -7  -8  304.67   12.98
  -1   7   7  187.39   11.56
   1  -7   7  178.02   12.44
  -1  -7  -7  191.45   15.28
  -1  -7  -7  183.65    8.56
  -1   7   6 1050.45   40.48
  -1  -7  -6 1074.66   46.62
   1  -7   5 1610.78   65.77
  -1   7   5 1787.30   64.84
  -1  -7  -5 1813.65   71.77
   1   7  -5 1709.04   68.08
   1  -7   4  125.02    9.92
  -1   7   4  136.73    9.75
  -1  -7  -4  128.80   12.91
   1   7  -4  132.41   11.28
  -1   7   3  174.50   11.08
  -1  -7  -3  161.81   14.59
   1   7  -3  159.95   12.62
   1  -7   3  141.19   10.58
  -1   7   2  144.98   10.17
  -1  -7  -2  141.24   13.56
   1  -7   2  138.99   10.10
   1   7  -2  148.01   11.94
  -1   7   1  155.94   10.67
  -1  -7  -1  151.12   14.28
   1  -7   1  154.80   10.50
   1   7  -1  154.27   12.09
  -1   7   0  941.71   38.07
  -1  -7   0  897.29   43.52
   1  -7   0  870.70   36.82
   1   7   0  957.87   40.25
  -1   7  -1  144.58   10.38
  -1  -7   1  148.93   14.02
   1  -7  -1  136.35    9.27
   1   7   1  127.30   10.83
  -1   7  -2  127.52    9.76
   1  -7  -2  111.66    8.11
  -1  -7   2  105.35   12.31
   1   7   2  117.83   10.23
  -1   7  -3  144.34   10.68
   1  -7  -3  129.07    8.72
  -1  -7   3  121.75   13.44
  -1   7  -4  160.31   11.43
  -1   7  -4  152.79   11.20
   1  -7  -4  131.15    8.66
   1  -7  -4  133.62    6.20
  -1   7  -5 1851.70   67.51
   1  -7  -5 1625.01   62.40
  -1   7  -5 1889.36   67.58
   1  -7  -5 1707.17   59.20
  -1   7  -6  967.26   43.85
   1  -7  -6  994.82   36.89
   1  -7  -6 1053.95   36.31
  -1   7  -7  184.99   13.71
  -1   7  -7  187.52   13.45
   1  -7  -7  187.30    6.96
   1  -7  -7  146.79    7.51
  -1   7  -8  360.46   21.90
  -1   7  -8  398.40   21.93
  -1   7  -9  538.53   27.98
  -1   7  -9  552.60   27.09
   1  -7  -9  443.49   18.89
   1  -7  -9  541.73   20.25
  -1   7 -10  544.32   28.84
   1  -7 -10  517.56   18.92
   1  -7 -10  459.61   18.46
   1  -7 -10  471.43   19.66
   1  -7 -11    7.62    2.05
   1  -7 -11    4.73    2.15
   1  -7 -11    2.67    2.56
   1  -7 -12  186.51    8.67
   1  -7 -12  172.95    9.37
   1  -7 -12  180.35    8.48
   1  -7 -13   89.55    5.45
   1  -7 -13   96.68    6.53
   1  -7 -13   90.05    5.47
   1  -7 -14  171.67    8.41
   1  -7 -14  176.35    9.55
   1  -7 -15   19.41    2.87
   1  -7 -15   14.51    3.50
   1  -7 -16   76.10    5.11
   1  -7 -16   63.69    5.70
   1   7  16   74.82    4.47
   1  -7 -17  296.62   13.30
   1   7  17  305.77   12.74
   1  -7 -17  344.53   14.67
   1  -7 -18  244.05   11.13
   1  -7 -18  256.26   12.21
   1   7  18  228.29   10.37
   1  -7 -19    8.27    2.70
   1  -7 -19    5.95    3.45
   1   7  19    8.17    2.31
   1  -7 -20   75.79    5.40
   1   7  20   71.77    4.87
   1  -7 -21   74.37    5.38
   1  -7 -22  194.62    9.72
   1  -7 -23  157.77    8.35
   1  -7 -24  313.95   13.73
   1  -7 -25  140.26    7.73
   1  -7 -25  136.54    8.72
   1  -7 -26  434.20   17.65
   1  -7 -26  431.07   18.54
   1  -7 -27   11.98    3.07
   1  -7 -27    7.00    4.09
   1  -7 -28   41.59    4.19
   1  -7 -28   47.33    5.48
   1  -7 -29  206.02    9.62
   1  -7 -29  196.63   10.96
   1  -7 -30  257.77   11.05
   1  -7 -30  232.73   12.14
   1  -7 -31  106.89    6.02
   1  -7 -31  107.05    7.54
   1  -7 -32   61.00    4.26
   1  -7 -32   57.20    6.28
   1  -7 -33   69.30    4.32
   1  -7 -33   71.93    6.16
   1   7  33   76.94    5.74
   1   7  34   12.47    3.43
   1  -7 -34    9.92    3.73
   1   7  35   32.29    3.45
   1   7  35   36.39    4.05
   1  -7 -35   38.55    4.37
   1   7  36   40.73    3.30
   1  -7 -36   38.99    4.13
   1   7  36   38.65    3.78
   1  -7 -37   95.07    5.55
   1   7  37   89.92    5.31
   1   7  38  185.15    8.42
   1  -7 -38  214.09    8.80
   1   7  39    4.58    1.78
   1  -7 -39    2.92    1.93
   1   7  40   20.59    1.89
   1  -7 -40   23.05    2.05
   1  -7 -41    8.13    1.17
  -1   8  40    6.72    0.94
  -1  -8 -36   29.05    2.32
  -1  -8 -35    1.16    1.66
  -1  -8 -34    1.69    2.02
  -1   8  34    4.13    2.73
  -1   8  33    9.52    3.20
  -1  -8 -33   10.55    2.71
  -1  -8 -32   43.78    4.13
  -1   8  32   48.60    4.54
  -1  -8 -31   75.28    5.63
  -1   8  31   81.34    5.78
  -1  -8 -30   67.42    5.53
  -1   8  30   72.54    5.75
  -1  -8 -29   43.08    5.01
  -1   8  29   47.12    5.05
  -1  -8 -28  203.09   10.66
  -1   8  28  194.65   10.08
  -1  -8 -27   47.81    5.57
  -1   8  27   45.08    5.08
  -1   8  26  137.96    8.23
  -1  -8 -26  153.04    9.50
  -1  -8 -25  527.27   22.43
  -1   8  25  526.48   21.21
  -1   8  24  188.11    9.73
  -1  -8 -24  184.76   11.13
  -1  -8 -23 1200.00   45.31
  -1  -8 -22  367.65   17.31
  -1  -8 -21   94.15    7.82
  -1  -8 -20   58.41    6.57
  -1  -8 -19   42.66    3.78
  -1  -8 -19   47.06    6.07
  -1  -8 -18  177.73    8.60
  -1  -8 -18  166.04   10.66
  -1  -8 -17   54.70    4.35
  -1  -8 -17   66.80    6.62
  -1  -8 -16  171.28    8.47
  -1  -8 -16  171.46   10.62
  -1  -8 -15  162.70    8.38
  -1  -8 -15  176.11   10.50
  -1  -8 -14   33.66    3.57
  -1  -8 -14   25.66    4.68
  -1  -8 -13  138.64    7.44
  -1  -8 -13  135.82    8.78
  -1  -8 -12  398.00   16.58
  -1  -8 -12  386.17   17.81
   1  -8  12  411.79   15.02
  -1  -8 -11   29.68    3.54
   1  -8  11   32.35    2.39
  -1  -8 -11   35.69    4.79
  -1  -8 -10 1090.66   39.19
   1  -8  10 1075.43   37.60
  -1  -8 -10 1089.20   40.47
  -1  -8  -9   18.75    3.01
   1  -8   9   17.38    2.42
  -1  -8  -9   32.62    4.33
   1  -8   9   25.08    2.14
   1  -8   8  865.22   31.27
  -1  -8  -8  832.45   31.81
   1  -8   8  869.26   30.26
  -1  -8  -7   25.66    3.22
   1  -8   7   26.19    2.77
   1  -8   7   27.46    2.28
   1  -8   6   72.41    7.90
   1  -8   6   73.89    4.68
  -1  -8  -6   70.70    5.07
   1  -8   6   71.25    3.89
   1  -8   5  466.31   25.66
   1  -8   5  545.05   20.47
  -1  -8  -5  533.03   20.71
   1  -8   5  538.07   19.47
   1  -8   4  127.51   10.70
  -1  -8  -4  151.85    7.85
   1  -8   4  159.63    7.63
   1  -8   4  150.12    6.69
   1  -8   3   57.55    4.26
  -1  -8  -3   58.22    4.43
   1  -8   3   61.98    3.69
   1  -8   2  561.26   21.04
   1  -8   2  537.46   19.97
   1  -8   1   46.58    3.81
   1  -8   1   48.21    3.27
   1  -8   0   16.52    2.59
   1  -8   0   25.43    2.52
   1  -8  -1   38.05    3.67
   1  -8  -1   47.31    3.27
   1  -8  -2  536.86   20.72
   1  -8  -2  540.11   19.00
   1  -8  -2  533.83   19.86
   1  -8  -3   57.10    4.28
   1  -8  -3   63.67    3.14
   1  -8  -3   57.85    3.87
   1  -8  -3   62.94    4.77
   1  -8  -4  130.79    6.87
   1  -8  -4  125.19    5.32
   1  -8  -4  127.94    6.22
   1  -8  -4  119.77    7.15
   1  -8  -5  559.74   21.09
   1  -8  -5  537.64   20.43
   1  -8  -5  544.50   21.74
   1  -8  -6   86.22    5.28
   1  -8  -6   68.16    5.48
   1  -8  -6   78.18    4.72
   1  -8  -7   32.17    3.18
   1  -8  -7   35.70    4.09
   1  -8  -8  910.69   32.53
   1  -8  -8  881.36   33.92
   1  -8  -9   27.90    3.97
   1  -8 -10 1025.24   37.51
   1  -8 -10 1050.32   38.67
   1  -8 -11   24.53    3.20
   1  -8 -11   25.04    4.06
   1  -8 -12  411.31   15.59
   1  -8 -12  390.51   16.58
   1  -8 -13  146.78    7.75
   1  -8 -13  147.15    8.77
   1  -8 -14   45.78    4.10
   1  -8 -14   36.30    4.90
   1  -8 -15  153.33    8.40
   1  -8 -15  177.50    9.61
   1  -8 -16  173.77    9.04
   1  -8 -16  177.77   10.09
   1  -8 -17   48.20    4.68
   1  -8 -17   68.52    6.10
   1  -8 -18  149.37    8.37
   1  -8 -18  155.15    9.33
   1  -8 -19   56.34    4.84
   1  -8 -19   55.77    5.95
   1  -8 -20   62.24    5.21
   1  -8 -20   63.27    6.34
   1  -8 -21   82.37    5.98
   1  -8 -21   86.27    7.10
   1  -8 -22  340.08   14.74
   1  -8 -23 1193.73   43.33
   1  -8 -24  178.52    9.26
   1  -8 -25  518.87   20.78
   1  -8 -26  164.06    8.54
   1  -8 -27   43.70    4.22
   1  -8 -27   49.15    5.71
   1  -8 -28  195.22    9.15
   1  -8 -28  171.40   10.17
   1  -8 -29   46.28    4.09
   1  -8 -29   44.28    5.44
   1  -8 -30   74.02    4.86
   1  -8 -30   64.47    6.44
   1  -8 -31   76.01    4.77
   1  -8 -31   70.82    6.40
   1   8  31   73.06    5.28
   1  -8 -32   44.41    3.44
   1   8  32   40.40    4.02
   1  -8 -32   48.22    4.98
   1  -8 -33    9.93    1.93
   1   8  33   12.39    2.88
   1  -8 -33   14.03    3.76
   1   8  34    3.09    2.25
   1  -8 -34    4.24    3.25
   1   8  35    0.86    2.17
   1   8  35    0.98    2.14
   1  -8 -35    1.37    2.83
   1   8  36   26.01    2.45
   1  -8 -36   25.03    3.23
   1   8  36   23.76    2.58
   1   8  37    0.61    1.50
   1  -8 -37    1.56    2.10
   1   8  38   13.29    1.52
   1  -8 -38   19.29    2.24
   1  -8 -39   25.85    2.08
   1  -8 -40    9.41    1.03
  -1  -9 -35   44.88    2.77
  -1  -9 -34   27.07    2.56
  -1  -9 -33   51.17    3.72
  -1   9  33   53.21    3.89
  -1  -9 -32  120.51    6.43
  -1   9  32  123.24    6.50
  -1  -9 -31  229.58   10.74
  -1   9  31  255.15   10.70
  -1  -9 -30  150.06    8.14
  -1   9  30  147.06    7.69
  -1  -9 -29   44.02    5.05
  -1   9  29   47.21    4.32
  -1  -9 -28  101.05    7.03
  -1   9  28  100.10    6.21
  -1  -9 -27   61.74    6.08
  -1   9  27   65.56    5.10
  -1  -9 -26   88.07    7.44
  -1   9  26   90.40    5.98
  -1   9  25  199.09    9.78
  -1  -9 -25  190.45   11.24
  -1  -9 -24   14.79    5.32
  -1   9  24   13.37    3.54
  -1   9  23  636.97   24.54
  -1  -9 -23  628.66   26.38
  -1   9  22  106.92    6.76
  -1  -9 -22  124.16    9.28
  -1  -9 -21   45.95    4.02
  -1  -9 -21   52.51    6.86
  -1  -9 -20  164.72    8.41
  -1  -9 -20  183.23   11.37
  -1  -9 -19  297.35   12.63
  -1  -9 -19  271.67   15.04
  -1  -9 -18  122.76    6.84
  -1  -9 -18  111.17    9.21
  -1  -9 -17  451.27   18.28
  -1  -9 -17  458.07   20.84
  -1  -9 -16  110.19    6.67
  -1  -9 -16  120.72    9.24
  -1  -9 -15  403.86   16.33
  -1  -9 -15  367.94   18.21
  -1  -9 -14    2.00    2.72
  -1  -9 -14    1.99    4.61
  -1  -9 -13  287.18   12.38
  -1  -9 -13  242.91   13.90
  -1  -9 -12  353.72   15.66
   1  -9  12  382.61   14.33
  -1  -9 -12  375.09   17.62
  -1  -9 -11   37.27    4.27
  -1  -9 -11   30.10    5.33
   1  -9  11   36.05    2.85
  -1  -9 -10   14.14    3.23
   1  -9  10   16.11    2.44
   1  -9  10   15.14    2.10
  -1  -9 -10   16.89    4.39
   1  -9   9    1.29    1.80
  -1  -9  -9    1.68    2.84
   1  -9   9    1.20    1.63
  -1  -9  -9    0.58    3.83
   1  -9   8  332.10   14.42
  -1  -9  -8  327.30   14.99
   1  -9   8  364.02   13.69
  -1  -9  -8  382.73   16.50
   1  -9   7  270.30   11.73
  -1  -9  -7  254.82   12.22
   1  -9   7  271.47   10.92
   1  -9   6  145.86    7.74
  -1  -9  -6  142.91    8.17
   1  -9   6  159.62    7.07
   1  -9   5   68.55    4.87
  -1  -9  -5   66.60    5.31
   1  -9   5   76.19    4.38
   1  -9   4  122.53    7.05
  -1  -9  -4  125.71    7.35
   1  -9   4  132.45    6.36
  -1  -9  -3  166.88    8.85
   1  -9   3  163.50    8.47
   1  -9   3  175.01    7.81
   1  -9   2   16.13    2.94
  -1  -9  -2   19.41    3.27
   1  -9   2   20.48    2.62
   1  -9   1  165.18    8.33
  -1  -9  -1  159.43    8.51
   1  -9   1  155.19    7.44
   1  -9   0   15.11    2.94
   1  -9   0   13.81    2.55
   1  -9   0   12.30    2.67
   1  -9  -1  190.35    9.10
   1  -9  -1  166.52    9.08
   1  -9  -1  177.67    8.26
   1  -9  -2   18.41    3.18
   1  -9  -2   18.91    2.79
   1  -9  -2   19.41    3.19
   1  -9  -3  184.95    9.01
   1  -9  -3  174.62    8.34
   1  -9  -3  171.58    9.39
   1  -9  -4  126.43    7.32
   1  -9  -4  140.28    8.07
   1  -9  -4  130.46    6.84
   1  -9  -5   81.97    5.75
   1  -9  -5   91.01    6.39
   1  -9  -5   89.26    5.44
   1  -9  -6  139.49    7.86
   1  -9  -6  151.03    7.71
   1  -9  -6  159.23    8.83
   1  -9  -7  251.58   12.33
   1  -9  -7  247.76   11.04
   1  -9  -8  364.22   16.39
   1  -9  -8  369.92   15.24
   1  -9  -9    2.09    2.71
   1  -9  -9    4.72    3.17
   1  -9 -10   16.55    3.39
   1  -9 -10   16.97    3.52
   1  -9 -10   15.61    3.98
   1  -9 -11   32.27    3.90
   1  -9 -11   27.87    4.49
   1  -9 -12  367.20   15.87
   1  -9 -12  393.18   17.26
   1  -9 -13  254.01   11.55
   1  -9 -13  225.31   12.36
   1  -9 -14    2.68    2.66
   1  -9 -14    1.25    3.50
   1  -9 -15  388.39   16.17
   1  -9 -15  367.34   17.11
   1  -9 -16  115.48    7.28
   1  -9 -16  126.45    8.36
   1  -9 -17  445.60   18.71
   1  -9 -17  456.26   19.85
   1  -9 -18  115.87    7.38
   1  -9 -18  114.15    8.22
   1  -9 -19  338.74   14.46
   1  -9 -19  296.04   15.06
   1  -9 -20  170.17    9.38
   1  -9 -20  180.98   10.38
   1  -9 -21   69.57    5.61
   1  -9 -21   56.43    6.29
   1  -9 -22  122.74    7.47
   1  -9 -22  111.44    8.18
   1  -9 -23  608.11   21.89
   1  -9 -23  468.88   22.12
   1  -9 -24   15.02    3.64
   1  -9 -25  173.14    9.00
   1  -9 -26   92.50    6.05
   1  -9 -27   70.26    5.13
   1   9  27   68.19    4.70
   1  -9 -28  104.46    5.98
   1   9  28   87.07    5.34
   1  -9 -29   41.98    3.67
   1   9  29   34.28    3.31
   1  -9 -29   35.11    4.66
   1  -9 -30  150.87    7.16
   1   9  30  142.82    6.94
   1  -9 -30  142.19    8.22
   1  -9 -31  254.62    9.81
   1   9  31  214.24    9.52
   1  -9 -31  215.81   10.76
   1  -9 -32  116.68    5.50
   1   9  32  105.35    5.48
   1  -9 -32  123.25    6.83
   1  -9 -33   54.40    3.11
   1  -9 -33   50.26    4.44
   1   9  33   48.43    3.20
   1  -9 -34   27.35    3.35
   1   9  34   22.58    2.03
   1   9  35   55.60    3.23
   1  -9 -35   54.18    3.66
   1   9  35   35.41    2.28
   1   9  36   20.73    1.78
   1  -9 -36   33.78    2.70
   1  -9 -37   12.09    1.74
   1  -9 -38   46.47    2.51
  -1 -10 -34    2.04    1.11
  -1 -10 -33   80.68    4.21
  -1 -10 -32   13.24    2.35
  -1 -10 -31   25.09    3.09
  -1 -10 -30    5.73    2.72
  -1  10  30    7.50    2.21
  -1 -10 -29   57.40    4.79
  -1  10  29   61.91    4.16
  -1 -10 -28  194.65    9.68
  -1  10  28  185.55    8.64
  -1 -10 -27   97.43    6.99
  -1  10  27  102.23    5.77
  -1 -10 -26   18.74    4.51
  -1  10  26   10.73    2.68
  -1  10  25  244.78   10.68
  -1 -10 -25  236.02   12.40
  -1  10  24  342.14   13.81
  -1 -10 -24  314.04   15.55
  -1 -10 -23    9.31    5.14
  -1  10  23    9.82    2.92
  -1 -10 -22   34.95    3.41
  -1 -10 -22   35.61    6.19
  -1  10  22   34.46    3.62
  -1 -10 -21   25.35    3.15
  -1 -10 -21   25.07    5.93
  -1  10  21   25.19    3.32
  -1 -10 -20  104.69    6.21
  -1 -10 -20  106.69    8.88
  -1  10  20   98.50    6.09
  -1 -10 -19  106.31    6.28
  -1 -10 -19   96.86    8.94
  -1  10  19   95.76    6.00
  -1 -10 -18   73.40    5.19
  -1 -10 -18   67.91    7.97
  -1 -10 -17  243.92   11.19
  -1 -10 -17  232.20   13.70
  -1 -10 -16  204.98    9.88
  -1 -10 -16  185.76   12.36
  -1 -10 -15  436.36   17.63
  -1 -10 -15  405.29   20.06
  -1 -10 -14  402.78   16.97
  -1 -10 -14  416.58   19.59
  -1 -10 -13   72.83    5.62
  -1 -10 -13   73.66    7.81
  -1 -10 -12   81.23    6.10
  -1 -10 -12   83.66    8.25
  -1 -10 -11  112.48    6.99
   1 -10  11  101.00    5.99
  -1 -10 -11  106.50    8.59
   1 -10  11  112.51    5.80
  -1 -10 -10   62.06    5.63
   1 -10  10   65.31    4.60
   1 -10  10   65.05    4.28
  -1 -10 -10   61.44    6.86
  -1 -10  -9  327.83   14.66
   1 -10   9  328.55   13.80
  -1 -10  -9  312.96   15.99
   1 -10   9  326.91   13.16
  -1 -10  -8  201.61   10.52
   1 -10   8  197.47    9.64
   1 -10   8  208.59    9.16
  -1 -10  -8  216.12   11.85
   1 -10   7  176.90    8.79
  -1 -10  -7  184.17    9.56
   1 -10   7  164.88    8.04
  -1 -10  -7  163.85   10.40
   1 -10   6  644.55   24.61
  -1 -10  -6  620.56   25.22
   1 -10   6  654.49   23.93
  -1 -10  -6  642.92   26.53
  -1 -10  -5  150.21    8.95
   1 -10   5  162.80    8.43
   1 -10   5  165.06    7.84
   1 -10   4   84.27    5.83
  -1 -10  -4   94.30    6.56
   1 -10   4   87.20    5.34
   1 -10   3    6.60    2.73
  -1 -10  -3    3.60    3.02
   1 -10   3    6.74    2.61
   1 -10   2   13.59    3.11
  -1 -10  -2   11.40    3.49
   1 -10   2   15.87    3.00
  -1 -10  -1  136.16    8.14
   1 -10   1  135.58    7.59
   1 -10   1  137.53    7.16
   1 -10   1  127.69    7.68
   1 -10   0    3.95    2.77
  -1 -10   0    6.23    3.23
   1 -10   0    2.03    2.64
   1 -10   0    1.90    2.52
  -1 -10   1  139.20    8.40
   1 -10  -1  145.97    8.04
   1 -10  -1  144.18    7.60
   1 -10  -1  140.47    8.32
   1 -10  -2   11.89    3.03
  -1 -10   2    8.17    3.38
   1 -10  -2    9.58    3.01
   1 -10  -2    9.88    3.12
   1 -10  -3    5.27    2.97
  -1 -10   3    3.59    3.13
   1 -10  -3    5.67    3.01
   1 -10  -3    5.79    2.99
   1 -10  -4   81.36    5.76
   1 -10  -4   70.48    6.09
   1 -10  -4   69.82    5.23
   1 -10  -5  166.64    8.99
   1 -10  -5  173.98    9.70
   1 -10  -5  164.44    8.65
   1 -10  -6  656.26   25.79
   1 -10  -6  699.24   26.84
   1 -10  -6  652.38   25.46
   1 -10  -7  136.82    8.70
   1 -10  -7  142.88    8.05
   1 -10  -8  182.48    9.69
   1 -10  -8  205.65   10.89
   1 -10  -9  313.65   14.99
   1 -10 -10   48.59    5.02
   1 -10 -10   67.89    6.21
   1 -10 -11  118.29    7.63
   1 -10 -11  131.72    8.53
   1 -10 -12   64.23    5.56
   1 -10 -12   73.54    6.75
   1 -10 -13   65.30    5.75
   1 -10 -13   77.70    6.65
   1 -10 -14  462.76   19.16
   1 -10 -14  468.20   20.25
   1 -10 -15  385.59   16.84
   1 -10 -15  398.82   18.05
   1 -10 -16  192.00    9.97
   1 -10 -16  183.40   10.72
   1 -10 -17  229.76   11.54
   1 -10 -17  233.28   12.33
   1 -10 -18   63.35    5.83
   1 -10 -18   61.23    6.24
   1 -10 -19  120.92    7.70
   1 -10 -19  106.87    8.22
   1 -10 -20  122.62    7.72
   1 -10 -20  133.27    8.64
   1 -10 -21   22.40    4.14
   1 -10 -21   18.90    4.72
   1 -10 -22   42.70    4.75
   1 -10 -22   43.22    5.54
   1 -10 -23   10.17    3.53
   1 -10 -23    6.32    4.37
   1 -10 -24  315.48   13.70
   1 -10 -24  311.94   14.32
  -1 -10  25  210.93    9.57
   1 -10 -25  181.15   10.70
   1 -10 -26   13.35    2.98
  -1 -10  26   10.70    2.08
   1 -10 -27  110.99    6.18
   1 -10 -28  185.17    8.47
   1 -10 -29   55.65    3.90
   1 -10 -30    3.54    1.81
   1 -10 -31   18.82    2.05
   1 -10 -32   13.39    1.58
   1 -10 -32   13.51    2.74
   1 -10 -33   90.82    5.04
   1  10  34    1.93    1.48
   1 -10 -34    2.77    1.72
   1  10  35   56.70    2.96
   1 -10 -35   88.20    3.75
   1 -10 -36    6.46    1.11
  -1 -11 -33   32.74    1.82
  -1 -11 -32   15.04    1.60
  -1 -11 -31   18.22    2.14
  -1 -11 -30   45.31    3.38
  -1 -11 -29   12.96    2.53
  -1 -11 -28   47.18    4.19
  -1  11  27   16.08    1.99
  -1 -11 -27   12.01    3.27
  -1 -11 -26   33.62    4.45
  -1  11  26   31.10    2.68
  -1  11  25  163.63    7.41
  -1 -11 -25  180.29    9.46
  -1  11  24   50.50    3.57
  -1 -11 -24   52.58    5.76
  -1  11  23   12.57    2.21
  -1 -11 -23   10.60    4.75
  -1 -11 -22   71.39    4.45
  -1 -11 -22   70.09    7.22
  -1  11  22   59.24    4.06
  -1 -11 -21   28.70    3.24
  -1 -11 -21   27.45    5.82
  -1  11  21   26.92    2.89
  -1 -11 -20  136.91    7.22
  -1  11  20  132.85    6.62
  -1 -11 -20  144.79    9.82
  -1 -11 -19   53.07    4.32
  -1 -11 -19   57.10    7.35
  -1  11  19   47.84    3.64
  -1 -11 -18    4.37    2.71
  -1 -11 -18    3.46    5.96
  -1  11  18    4.82    1.91
  -1 -11 -17  223.92   10.23
  -1 -11 -17  221.94   13.00
  -1  11  17  201.09    9.19
  -1 -11 -16  114.81    6.66
  -1  11  16   89.63    5.28
  -1 -11 -16  114.22    9.56
  -1 -11 -15   60.02    4.99
  -1 -11 -15   40.94    7.29
  -1 -11 -14   59.81    5.14
  -1 -11 -14   53.53    7.68
  -1 -11 -13   48.46    4.93
  -1 -11 -13   54.94    7.43
   1 -11  12   11.32    2.14
  -1 -11 -12   10.45    3.71
  -1 -11 -12   16.09    6.08
  -1 -11 -11  315.75   13.89
   1 -11  11  290.69   12.61
   1 -11  11  296.27   12.43
  -1 -11 -11  329.43   16.13
   1 -11  10  233.70   10.46
  -1 -11 -10  246.68   11.51
  -1 -11 -10  205.40   13.17
   1 -11  10  228.54   10.19
  -1 -11  -9  343.95   15.29
   1 -11   9  354.28   14.41
   1 -11   9  341.39   14.04
  -1 -11  -9  326.40   17.01
   1 -11   8  225.82   10.20
  -1 -11  -8  220.36   11.14
   1 -11   8  209.07    9.73
  -1 -11  -8  201.30   12.62
  -1 -11  -7   25.46    4.43
   1 -11   7   19.49    3.08
   1 -11   7   25.30    3.39
  -1 -11  -7   12.51    5.29
   1 -11   6   51.32    4.43
  -1 -11  -6   49.17    5.38
   1 -11   6   57.00    4.49
   1 -11   5  214.05   10.31
  -1 -11  -5  213.99   11.17
   1 -11   5  214.40    9.94
   1 -11   4   54.72    4.76
  -1 -11  -4   59.83    5.97
   1 -11   4   57.56    4.70
   1 -11   3  133.97    7.58
  -1 -11  -3  123.22    8.31
   1 -11   3  131.19    7.19
   1 -11   2  101.94    6.73
  -1 -11  -2   97.68    7.49
   1 -11   2  100.36    6.38
  -1 -11  -1 1109.73   41.38
   1 -11   1 1132.62   40.73
   1 -11   1 1074.12   40.90
   1 -11   1 1122.61   40.14
   1 -11   0   62.59    5.37
  -1 -11   0   65.55    5.99
   1 -11   0   46.37    4.82
   1 -11   0   52.64    5.01
   1 -11  -1 1122.24   40.44
  -1 -11   1 1086.11   40.94
   1 -11  -1 1113.86   40.90
   1 -11  -1 1081.23   39.91
  -1 -11   2   94.82    7.27
   1 -11  -2   94.67    6.86
   1 -11  -2  104.30    6.74
   1 -11  -2  104.83    7.15
   1 -11  -3  128.85    7.73
  -1 -11   3  110.72    8.00
   1 -11  -3  124.13    7.94
   1 -11  -3  125.18    7.53
   1 -11  -4   41.22    4.86
   1 -11  -4   40.83    4.87
   1 -11  -4   48.40    4.99
   1 -11  -5  239.66   11.64
   1 -11  -5  237.60   12.15
   1 -11  -6   42.96    5.10
   1 -11  -6   54.62    5.54
   1 -11  -7   16.31    3.91
  -1 -11   7   17.64    4.39
   1 -11  -7   17.44    4.14
  -1 -11   8  234.96   11.75
   1 -11  -8  213.55   11.74
  -1 -11   9  334.05   15.39
   1 -11  -9  333.99   15.60
  -1 -11  10  265.67   12.97
   1 -11 -10  257.40   13.12
  -1 -11  11  320.23   14.45
   1 -11 -11  302.81   14.06
   1 -11 -11  297.39   14.79
   1 -11 -12   16.25    4.40
  -1 -11  12   18.52    3.89
   1 -11 -12   26.42    4.78
  -1 -11  13   61.01    5.91
   1 -11 -13   63.52    5.84
   1 -11 -13   65.80    6.34
   1 -11 -14   61.70    5.99
  -1 -11  14   67.93    5.86
   1 -11 -14   61.49    6.29
  -1 -11  15   60.93    5.46
   1 -11 -15   56.95    5.76
   1 -11 -15   55.29    5.98
   1 -11 -16  101.44    7.21
  -1 -11  16  100.65    6.88
   1 -11 -16  111.86    7.85
  -1 -11  17  236.50   11.19
   1 -11 -17  221.31   11.31
   1 -11 -17  220.71   11.86
   1 -11 -18    2.08    3.66
  -1 -11  18    2.64    3.03
   1 -11 -18    4.14    4.05
   1 -11 -19   51.58    5.33
  -1 -11  19   61.87    5.18
   1 -11 -19   59.30    5.84
   1 -11 -20  133.48    7.82
  -1 -11  20  130.61    7.42
   1 -11 -20  136.33    8.39
   1 -11 -21   20.56    4.30
  -1 -11  21   25.48    3.48
   1 -11 -21   25.01    4.72
   1 -11 -22   62.90    5.44
  -1 -11  22   69.44    4.85
   1 -11 -22   66.92    5.90
   1 -11 -23   13.57    3.45
  -1 -11  23   14.32    2.65
   1 -11 -23    8.15    3.73
  -1 -11  24   60.92    4.04
   1 -11 -24   67.51    4.83
   1 -11 -24   61.62    5.30
   1 -11 -25  188.55    8.34
  -1 -11  25  148.86    7.19
   1 -11 -25  186.06    8.89
   1 -11 -26   42.13    3.61
   1 -11 -26   37.64    4.20
   1 -11 -27   14.25    2.51
   1 -11 -27   14.09    3.16
   1 -11 -28   46.01    3.24
   1 -11 -28   38.07    3.78
   1 -11 -29    9.19    1.76
   1 -11 -30   44.01    2.70
   1 -11 -31   18.17    1.46
   1  11  33   29.59    1.97
  -1 -12 -30   32.20    2.06
  -1 -12 -29  103.24    4.81
  -1 -12 -28    8.57    1.92
  -1 -12 -27   21.65    2.84
  -1 -12 -26  130.99    6.72
  -1 -12 -25    6.38    2.83
  -1 -12 -24   20.56    3.85
  -1 -12 -23   71.37    5.96
  -1 -12 -22    7.06    1.81
  -1 -12 -22    7.08    4.38
  -1 -12 -21   71.90    4.46
  -1 -12 -21   83.90    6.81
  -1 -12 -20   33.51    3.26
  -1 -12 -20   27.66    5.56
  -1 -12 -19   35.13    3.48
  -1 -12 -19   38.96    5.98
  -1 -12 -18   65.81    4.73
  -1 -12 -18   54.66    7.10
  -1 -12 -17   11.14    3.00
  -1 -12 -17   11.50    5.92
  -1 -12 -16   17.91    3.24
  -1 -12 -16   20.86    6.08
  -1 -12 -15   70.30    5.41
  -1 -12 -15   66.97    8.18
  -1 -12 -14  114.33    7.09
  -1 -12 -14  110.96    9.76
  -1 -12 -13    3.60    3.20
  -1 -12 -13    3.53    5.75
  -1 -12 -12  270.85   12.20
  -1 -12 -12  244.51   14.46
   1 -12  11  192.57    8.87
  -1 -12 -11  223.53   10.40
  -1 -12 -11  179.65   12.41
   1 -12  10  127.21    6.61
  -1 -12 -10  131.06    7.95
  -1 -12 -10  119.00    9.93
   1 -12  10  123.20    6.58
  -1 -12  -9  169.33    9.04
   1 -12   9  154.88    7.68
   1 -12   9  143.29    7.51
   1 -12   8   62.34    4.64
  -1 -12  -8   64.84    5.80
   1 -12   8   62.33    4.71
  -1 -12  -7   20.19    4.69
   1 -12   7   25.20    3.29
   1 -12   7   25.81    3.58
  -1 -12  -6  248.21   12.53
   1 -12   6  257.56   11.52
   1 -12   6  259.11   11.43
  -1 -12  -5  416.65   17.59
   1 -12   5  418.90   16.64
   1 -12   5  376.83   16.28
  -1 -12  -4  272.40   13.96
   1 -12   4  301.99   13.07
   1 -12   4  299.70   12.82
  -1 -12  -3  217.96   11.46
   1 -12   3  216.08   10.52
  -1 -12  -3  210.56   12.54
   1 -12   3  223.21   10.37
   1 -12   2   10.43    3.20
  -1 -12  -2    8.26    4.68
   1 -12   2   11.37    3.37
  -1 -12  -2   10.16    5.52
  -1 -12  -1  350.07   15.85
   1 -12   1  341.88   15.05
  -1 -12  -1  355.85   16.94
   1 -12   0    1.34    3.04
  -1 -12   0    3.52    4.24
   1 -12   0    1.82    2.63
  -1 -12   0    2.11    4.50
   1 -12  -1  327.64   14.29
  -1 -12   1  326.67   14.98
   1 -12  -1  309.43   14.31
   1 -12  -2    9.99    3.67
  -1 -12   2    5.85    4.66
   1 -12  -2   11.69    3.42
   1 -12  -3  229.25   11.13
   1 -12  -3  219.99   11.22
   1 -12  -4  292.29   13.57
   1 -12  -4  298.60   13.83
   1 -12  -5  449.85   18.23
   1 -12  -5  411.99   18.29
   1 -12  -6  270.51   12.79
   1 -12  -6  281.60   13.25
   1 -12  -7   19.70    4.24
  -1 -12   7   19.07    4.90
   1 -12  -7   20.19    4.11
  -1 -12   8   56.14    6.00
   1 -12  -8   69.19    5.97
  -1 -12   9  164.73    9.27
   1 -12  -9  145.23    9.10
  -1 -12  10  135.89    8.49
   1 -12 -10  129.25    8.29
   1 -12 -11  188.23   10.23
  -1 -12  11  206.12   10.73
   1 -12 -11  204.59   10.70
   1 -12 -12  256.43   12.48
  -1 -12  12  268.78   12.63
   1 -12 -12  253.70   12.60
   1 -12 -13    7.13    4.18
  -1 -12  13    6.28    3.70
   1 -12 -13    3.43    3.47
   1 -12 -14  128.50    8.10
  -1 -12  14  120.52    7.70
   1 -12 -14  132.73    8.13
  -1 -12  15   63.85    5.47
   1 -12 -15   61.29    6.04
   1 -12 -15   68.08    5.86
   1 -12 -16   14.77    4.26
  -1 -12  16   14.64    3.54
   1 -12 -16   18.05    3.96
   1 -12 -17   10.71    3.94
  -1 -12  17   13.22    3.47
   1 -12 -17   19.31    4.01
  -1 -12  18   61.93    4.98
   1 -12 -18   60.50    5.46
   1 -12 -18   59.34    5.46
   1 -12 -19   36.37    4.49
  -1 -12  19   31.60    3.64
   1 -12 -19   23.33    3.97
   1 -12 -20   32.75    4.29
  -1 -12  20   36.80    3.70
   1 -12 -20   36.55    4.44
  -1 -12  21   70.74    4.64
   1 -12 -21   77.32    5.50
   1 -12 -21   79.75    5.58
   1 -12 -22    8.74    2.96
  -1 -12  22    4.56    1.81
   1 -12 -22    6.24    3.13
   1 -12 -23   83.77    5.09
  -1 -12  23   66.86    3.90
   1 -12 -23   76.97    5.18
   1 -12 -24   19.90    2.87
   1 -12 -24   19.79    3.15
   1 -12 -25    7.09    2.15
   1 -12 -25    6.28    2.52
   1 -12 -26  124.52    5.79
   1 -12 -26  121.04    6.15
   1 -12 -27   22.26    2.17
   1 -12 -27   20.79    2.52
   1 -12 -28    9.22    1.41
   1 -12 -28    9.56    1.92
   1 -12 -29   96.80    4.21
   1 -12 -29  110.27    4.84
   1 -12 -30   40.64    2.42
   1  12  31   39.67    2.35
   1 -12 -31   54.93    2.44
  -1 -13 -27    1.77    0.95
  -1 -13 -26   26.26    2.24
  -1 -13 -25    8.42    1.98
  -1 -13 -24   28.10    2.99
  -1 -13 -23    7.05    2.47
  -1 -13 -22    9.24    3.07
  -1 -13 -21    3.89    1.40
  -1 -13 -21    6.43    3.40
  -1 -13 -20  117.15    5.54
  -1 -13 -20  123.15    7.31
  -1 -13 -19    9.76    2.07
  -1 -13 -19    6.55    4.13
  -1 -13 -18  137.05    6.71
  -1 -13 -18  147.73    8.54
  -1 -13 -17   26.25    3.04
  -1 -13 -17   23.75    5.08
  -1 -13 -16   56.03    4.20
  -1 -13 -16   52.50    6.29
  -1 -13 -15   44.79    4.12
  -1 -13 -15   51.93    6.40
  -1 -13 -14   52.48    4.43
  -1 -13 -14   48.70    6.61
  -1 -13 -13   28.15    3.80
  -1 -13 -13   22.42    6.03
  -1 -13 -12   69.31    5.15
  -1 -13 -12   65.24    7.21
  -1 -13 -11   50.06    4.80
  -1 -13 -10   27.56    4.22
   1 -13  10   24.37    2.53
  -1 -13  -9   26.54    4.32
   1 -13   9   25.16    2.76
  -1 -13  -8   27.14    4.27
   1 -13   8   24.64    2.87
  -1 -13  -7   24.00    4.30
   1 -13   7   27.80    3.15
   1 -13   6   12.17    2.76
  -1 -13  -6    9.68    4.26
  -1 -13  -5   85.55    6.89
   1 -13   5   89.01    5.63
  -1 -13  -5  101.76    8.48
  -1 -13  -4  654.30   25.10
   1 -13   4  632.46   24.06
  -1 -13  -4  617.69   26.47
  -1 -13  -3   70.81    6.44
   1 -13   3   73.92    5.21
  -1 -13  -3   69.92    7.68
  -1 -13  -2  160.22    9.15
   1 -13   2  153.22    8.17
  -1 -13  -2  155.11   10.14
   1 -13   1    7.04    3.06
  -1 -13  -1    6.34    4.78
  -1 -13  -1    7.73    4.98
   1 -13   0    0.45    2.81
  -1 -13   0   -2.10    4.54
  -1 -13   0    2.65    4.66
   1 -13  -1   10.06    3.52
  -1 -13   1   10.55    4.46
  -1 -13   1    8.87    4.90
  -1 -13   2  153.78    9.49
   1 -13  -2  169.84    8.72
  -1 -13   2  161.98   10.17
   1 -13  -2  152.31    8.08
   1 -13  -3   74.55    5.54
   1 -13  -3   67.94    5.06
  -1 -13   3   75.72    7.02
   1 -13  -4  610.45   23.49
   1 -13  -4  578.91   23.12
  -1 -13   4  615.76   24.82
   1 -13  -5   97.07    6.92
   1 -13  -5   99.92    6.39
  -1 -13   5  116.02    8.07
   1 -13  -6   10.68    3.79
  -1 -13   6    7.65    4.42
   1 -13  -6    7.27    3.02
  -1 -13   6    8.47    4.64
   1 -13  -7   23.29    4.29
  -1 -13   7   27.20    4.88
   1 -13  -7   23.28    3.63
  -1 -13   8   24.04    4.53
   1 -13  -8   28.66    3.90
  -1 -13   9   25.52    4.45
   1 -13  -9   20.94    3.55
  -1 -13  10   25.94    4.52
   1 -13 -10   26.56    3.85
  -1 -13  11   46.17    5.08
   1 -13 -11   50.45    4.66
   1 -13 -12   78.13    5.94
  -1 -13  12   74.15    5.69
   1 -13 -12   69.18    5.36
   1 -13 -13   31.48    4.65
  -1 -13  13   31.75    4.24
   1 -13 -13   31.37    4.01
  -1 -13  14   65.06    5.19
   1 -13 -14   58.73    5.20
   1 -13 -14   57.97    4.84
   1 -13 -15   50.18    4.84
  -1 -13  15   52.38    4.57
   1 -13 -15   50.24    4.48
   1 -13 -16   56.89    5.03
  -1 -13  16   62.88    4.69
   1 -13 -16   58.75    4.71
   1 -13 -17   23.35    3.34
   1 -13 -17   24.57    3.81
  -1 -13  17   21.73    3.06
   1 -13 -18  141.58    7.29
  -1 -13  18  131.66    6.61
   1 -13 -18  125.17    6.81
   1 -13 -19    8.05    2.93
  -1 -13  19    7.09    2.06
   1 -13 -19    9.24    2.54
  -1 -13  20  112.93    5.34
   1 -13 -20  115.48    6.07
   1 -13 -20  119.29    5.93
  -1 -13  20   95.35    5.29
   1 -13 -21    7.09    2.41
  -1 -13  21    4.84    1.25
   1 -13 -21    9.20    2.29
   1 -13 -22   11.76    2.28
   1 -13 -22   10.73    2.07
   1 -13 -23    6.38    1.89
   1 -13 -23    6.42    1.95
   1 -13 -24   36.28    2.59
   1 -13 -24   28.40    2.51
   1 -13 -25    8.91    1.44
   1 -13 -25    7.37    1.43
   1 -13 -26   21.45    1.61
   1 -13 -26   22.53    1.79
   1 -13 -27    1.35    0.79
  -1 -14 -24   31.88    1.81
  -1 -14 -23    3.66    1.10
  -1 -14 -22   41.45    2.73
  -1 -14 -21   20.95    2.38
  -1 -14 -20   12.29    2.39
  -1 -14 -19    3.27    1.03
  -1 -14 -19    2.08    2.37
  -1 -14 -18   61.32    3.36
  -1 -14 -18   69.14    4.76
  -1 -14 -17   22.81    2.19
  -1 -14 -17   22.51    3.54
  -1 -14 -16  128.78    5.98
  -1 -14 -16  131.63    7.40
  -1 -14 -15   10.50    2.27
  -1 -14 -15    9.39    3.71
  -1 -14 -14   24.02    2.86
  -1 -14 -14   23.66    4.32
  -1 -14 -13   77.44    4.77
  -1 -14 -12   59.53    4.31
  -1 -14 -11    7.08    2.82
  -1 -14 -10   30.89    3.51
   1 -14   9    7.77    1.41
  -1 -14  -9    9.26    3.07
   1 -14   8   74.29    4.09
  -1 -14  -8   93.54    5.70
  -1 -14  -8   68.70    6.44
   1 -14   7   11.85    2.01
  -1 -14  -7   13.41    3.42
  -1 -14  -7   12.77    5.03
   1 -14   6   47.14    3.42
  -1 -14  -6   46.70    4.73
  -1 -14  -6   36.14    5.79
   1 -14   5   44.65    3.47
  -1 -14  -5   48.38    4.68
  -1 -14  -5   39.65    5.62
   1 -14   4   39.06    3.47
  -1 -14  -4   40.65    4.75
  -1 -14  -4   38.40    5.40
  -1 -14  -3   23.10    4.13
   1 -14   3   27.18    3.07
  -1 -14  -3   22.06    5.12
   1 -14   2  251.36   10.57
  -1 -14  -2  250.82   11.45
  -1 -14  -2  218.75   12.21
   1 -14   1   65.95    4.55
  -1 -14  -1   63.89    5.85
  -1 -14  -1   71.00    6.59
  -1 -14   0  140.25    7.71
   1 -14   0  121.57    6.63
  -1 -14   0  113.81    8.30
  -1 -14   1   63.36    5.83
   1 -14  -1   75.21    5.08
  -1 -14   1   74.83    6.47
   1 -14  -2  254.34   10.95
  -1 -14   2  232.45   12.17
   1 -14  -3   24.57    3.56
  -1 -14   3   22.81    4.61
   1 -14  -4   36.90    4.13
  -1 -14   4   26.71    4.86
   1 -14  -5   47.77    4.26
  -1 -14   5   39.85    5.04
  -1 -14   6   52.16    5.05
   1 -14  -6   58.44    4.73
  -1 -14   6   53.09    5.35
   1 -14  -6   43.06    3.32
   1 -14  -7   16.13    3.22
  -1 -14   7   15.17    3.61
   1 -14  -7   10.54    2.08
  -1 -14   7   13.20    3.75
   1 -14  -8   79.92    5.32
  -1 -14   8   86.57    5.64
   1 -14  -8   64.14    4.24
  -1 -14   8   76.88    5.76
  -1 -14   9    6.65    3.24
   1 -14  -9    7.90    2.01
  -1 -14   9    4.81    3.11
  -1 -14  10   33.52    3.93
   1 -14 -10   26.43    2.75
  -1 -14  10   31.55    3.93
  -1 -14  11    6.90    2.76
   1 -14 -11    6.49    1.93
  -1 -14  11    6.27    2.78
  -1 -14  12   73.35    4.80
   1 -14 -12   61.41    4.01
  -1 -14  12   62.95    4.67
   1 -14 -13   76.93    5.06
  -1 -14  13   77.22    4.77
   1 -14 -13   69.42    4.19
  -1 -14  13   73.72    4.82
  -1 -14  14   32.92    3.25
   1 -14 -14   37.21    3.65
   1 -14 -14   31.03    2.73
  -1 -14  14   29.29    3.09
   1 -14 -15   12.80    2.81
  -1 -14  15   13.60    2.32
   1 -14 -15   11.62    1.94
  -1 -14  15   10.23    2.08
  -1 -14  16  124.71    5.47
   1 -14 -16  120.12    5.90
   1 -14 -16  114.26    5.24
  -1 -14  16   87.35    4.99
   1 -14 -17   25.40    2.84
  -1 -14  17   21.87    2.11
   1 -14 -17   22.61    2.20
  -1 -14  18   54.33    3.04
   1 -14 -18   73.79    4.04
   1 -14 -18   62.17    3.36
   1 -14 -19    3.24    1.82
   1 -14 -19    2.66    1.21
   1 -14 -20   11.10    1.86
   1 -14 -20    7.33    1.24
   1 -14 -21   21.47    1.87
   1 -14 -21   13.99    1.33
   1 -14 -22   37.93    2.28
   1 -14 -23    3.21    0.82
  -1 -15 -19    1.49    0.68
  -1 -15 -18   15.11    1.44
  -1 -15 -16   13.96    1.15
  -1 -15 -15    6.57    1.11
  -1 -15 -14   24.50    1.93
  -1 -15 -13   50.45    2.99
  -1 -15 -12   44.85    2.94
  -1 -15 -11   19.42    2.28
  -1 -15 -11   15.85    3.06
  -1 -15 -10   11.27    2.21
  -1 -15 -10   12.47    2.85
  -1 -15  -9   25.75    2.68
  -1 -15  -9   23.90    3.44
  -1 -15  -8   17.58    2.56
  -1 -15  -8   22.05    3.58
  -1 -15  -7   29.87    3.04
  -1 -15  -7   24.11    3.59
   1 -15   6    1.26    0.86
  -1 -15  -6    1.10    2.19
  -1 -15  -6    4.89    3.07
   1 -15   5   51.29    2.96
  -1 -15  -5   69.50    4.29
  -1 -15  -5   57.90    4.82
   1 -15   4   33.23    2.51
  -1 -15  -4   49.30    3.76
  -1 -15  -4   45.31    4.41
  -1 -15  -3   19.85    3.02
   1 -15   3   17.68    2.01
  -1 -15  -3   15.39    3.53
   1 -15   2  105.98    5.20
  -1 -15  -2  114.54    6.05
  -1 -15  -2  116.46    6.74
  -1 -15  -1   28.43    3.34
   1 -15   1   27.71    2.53
  -1 -15  -1   30.20    3.82
   1 -15   0   57.09    3.68
  -1 -15   0   63.04    4.45
  -1 -15   0   60.15    4.94
   1 -15  -1   25.94    2.74
  -1 -15   1   27.36    3.94
   1 -15  -2  115.10    5.66
  -1 -15   2  113.31    6.53
   1 -15  -3   15.24    2.41
  -1 -15   3   13.48    3.03
   1 -15  -4   43.67    3.32
  -1 -15   4   42.54    4.03
   1 -15  -5   73.57    4.38
  -1 -15   5   80.33    4.74
  -1 -15   5   66.66    4.75
   1 -15  -6    1.50    1.96
  -1 -15   6    1.14    2.25
  -1 -15   6    2.04    2.31
   1 -15  -7   34.20    2.98
  -1 -15   7   31.44    3.09
  -1 -15   7   23.21    2.86
   1 -15  -8   16.96    2.45
  -1 -15   8   16.63    2.54
  -1 -15   8   15.54    2.44
   1 -15  -9   28.72    2.82
  -1 -15   9   28.29    2.72
  -1 -15   9   22.71    2.47
  -1 -15  10   14.47    2.14
  -1 -15  10   10.69    1.84
  -1 -15  11   22.43    2.20
  -1 -15  11   12.13    1.55
  -1 -15  12   40.32    2.64
  -1 -15  13   45.39    2.62
  -1 -15  14   16.56    1.45
   1 -15 -14   28.51    2.27
   1 -15 -15    8.88    1.61
   1 -15 -16   20.32    1.80
   1 -15 -17   48.66    2.60
   1 -15 -18   19.58    1.43
   1 -15 -19    1.96    0.58
  -1 -16  -9   37.55    1.85
  -1 -16  -9   22.06    1.65
  -1 -16  -8   55.00    2.53
  -1 -16  -8   38.98    2.41
  -1 -16  -7  134.74    5.00
  -1 -16  -7  101.02    4.82
  -1 -16  -6   29.82    1.98
  -1 -16  -6   20.40    1.75
  -1 -16  -5   23.09    1.84
  -1 -16  -5   19.85    1.80
  -1 -16  -4  124.88    4.99
  -1 -16  -4  100.13    4.80
  -1 -16  -3    4.85    1.38
  -1 -16  -3    1.99    1.08
  -1 -16  -2   85.97    3.78
  -1 -16  -2   62.65    3.46
  -1 -16  -1   75.36    3.46
  -1 -16  -1   50.97    3.00
  -1 -16   0   21.49    1.72
  -1 -16   1   40.74    2.31
   1 -16  -2   47.85    2.32
   1 -16  -3    4.83    0.89
  -1 -16   3    6.75    1.35
  -1 -16   4  128.73    4.76
   1 -16  -4   90.59    4.21
  -1 -16   5   23.11    1.70
   1 -16  -5   16.33    1.39
  -1 -16   6   25.89    1.75
   1 -16  -6   22.23    1.56
  -1 -16   7  109.00    4.42
   1 -16  -7  103.49    4.35
   1 -16  -8   45.38    2.26
  -1 -16   8   41.49    2.12
   1 -16  -9   32.88    1.80
   1 -16 -10   65.08    2.84
  -2   0   0 4409.69  153.57
  -2   0   0 4559.15  153.44
  -2   0   1  800.73   30.59
  -2   0   1  788.11   30.52
  -2   0  -1  792.30   30.73
  -2   0  -1  827.67   31.04
  -2   0   2  184.81    9.80
  -2   0   2  181.58    9.36
  -2   0  -2  183.16    9.97
  -2   0  -2  191.07   10.09
  -2   0   3    7.17    3.07
  -2   0   3    9.74    2.52
  -2   0  -3    6.42    3.07
  -2   0  -3    8.63    3.00
  -2   0   4  381.07   16.26
  -2   0   4  383.18   17.09
  -2   0  -4  382.94   17.43
  -2   0  -4  382.80   17.59
  -2   0   5  350.32   15.28
  -2   0   5  341.27   16.06
  -2   0  -5  390.55   17.30
  -2   0   6   44.84    4.19
   2   0  -6   46.61    5.30
  -2   0   6   42.28    4.71
  -2   0   7 1018.37   37.93
   2   0  -7 1068.91   39.93
  -2   0   7  994.42   38.64
  -2   0   8  137.06    8.16
  -2   0   8  126.43    7.61
   2   0  -8  139.00    9.13
  -2   0  -8  119.19    9.92
  -2   0  -9    5.41    4.02
  -2   0   9    9.18    2.62
   2   0  -9   11.14    3.46
  -2   0   9    9.17    2.67
   2   0  -9    8.46    2.22
  -2   0  10  648.43   25.33
   2   0 -10  662.98   27.02
  -2   0  10  615.18   24.64
   2   0 -10  597.57   23.85
  -2   0 -10  622.12   28.71
  -2   0 -11   21.22    4.95
  -2   0  11   20.14    3.32
   2   0 -11   25.22    4.12
   2   0 -11   18.49    2.77
  -2   0  11   19.66    3.17
   2   0 -12    5.04    1.86
  -2   0 -12    4.39    3.90
  -2   0  12    6.36    2.56
   2   0 -12    5.34    2.81
   2   0 -13  205.25   12.40
  -2   0 -13  180.97   12.90
  -2   0 -13  198.06   13.40
   2   0 -13  199.60   10.02
  -2   0  13  211.93   11.81
   2   0 -14  235.57   13.57
  -2   0 -14  196.80   13.90
  -2   0 -14  216.42   14.49
   2   0 -14  222.98   10.93
  -2   0  14  227.70   12.95
   2   0 -15   49.15    6.01
  -2   0 -15   45.07    6.36
  -2   0 -15   50.92    6.57
   2   0 -15   55.65    4.75
  -2   0  15   48.55    5.72
   2   0  16   28.12    2.92
   2   0 -16   28.27    2.59
  -2   0 -16   19.42    4.50
  -2   0  16   23.21    4.42
   2   0 -16   16.41    3.81
  -2   0 -16   14.48    4.37
   2   0 -16   19.32    3.01
   2   0 -17    1.23    1.58
  -2   0 -17    0.95    2.17
  -2   0  17    1.40    2.43
   2   0 -17   -0.44    2.02
   2   0  17   -0.07    1.97
   2   0 -17    0.35    1.65
   2   0  18    8.63    2.51
   2   0 -18    9.47    1.94
   2   0  18    3.48    2.12
   2   0 -18    4.63    2.06
   2   0  19  201.89    9.57
   2   0 -19  216.97    9.31
   2   0  19  197.93    9.71
   2   0  20   55.14    4.44
   2   0 -20   55.69    4.03
   2   0  20   54.20    4.60
   2   0  21   33.90    3.77
   2   0 -21   34.22    3.47
   2   0  21   33.99    3.97
   2   0 -22   39.42    3.60
   2   0  22   35.73    4.00
   2   0  22   38.08    4.34
   2   0 -23    0.62    2.07
   2   0  23    0.60    2.67
   2   0  23    0.18    2.68
   2   0 -23    0.62    2.36
   2   0  24   10.18    3.10
   2   0 -24    9.76    2.70
   2   0  24   20.83    4.05
   2   0 -24   19.02    3.40
   2   0 -25  195.47    9.36
   2   0  25  183.87    9.59
   2   0  25  201.31   10.48
   2   0 -25  205.67   10.04
   2   0 -26   23.93    3.43
   2   0  26   21.17    3.56
   2   0  26   17.07    4.31
  -2   0  26   19.73    3.00
   2   0 -26   18.93    3.77
   2   0 -27  270.11   12.28
   2   0  27  288.55   12.63
   2   0 -27  284.76   13.14
   2   0  27  289.85   13.52
  -2   0  27  264.22   12.12
   2   0 -28  163.22    8.20
   2   0  28  158.53    8.25
   2   0 -28  138.92    8.59
   2   0  28  137.23    8.91
  -2   0  28  145.20    7.77
   2   0 -29    7.70    2.77
   2   0  29    5.04    3.08
   2   0  29    9.20    4.39
  -2   0  29    8.15    2.66
   2   0 -29    8.98    3.76
   2   0  30    5.93    2.78
   2   0 -30    6.14    2.77
   2   0  30    6.08    4.46
   2   0 -30    7.50    3.95
  -2   0  30    5.93    2.54
   2   0  31  331.47   13.68
   2   0 -31  347.59   13.91
   2   0  31  287.16   14.93
   2   0 -31  306.64   14.76
  -2   0  31  316.80   13.51
   2   0  32    9.32    2.76
   2   0  32   18.61    5.29
  -2   0  32   10.51    2.74
   2   0 -32   15.61    4.37
   2   0  33  222.30    9.85
   2   0 -33  221.93   11.62
   2   0  33  220.74   11.83
  -2   0  33  216.03    9.89
   2   0  34    2.67    2.15
   2   0  34    3.93    4.80
  -2   0  34    6.70    2.46
   2   0 -34    5.72    4.47
   2   0 -35   35.35    5.20
   2   0  35   32.99    5.67
  -2   0  35   38.02    3.34
   2   0 -36   77.02    6.20
   2   0  36   75.28    6.47
   2   0  37    1.49    3.96
   2   0  38   64.31    5.47
   2   0  39    9.10    3.39
   2   0  40   65.42    4.83
   2   0  41   37.18    3.39
   2   0  42    5.81    1.93
   2   0  43   12.53    1.63
   2  -1  43    3.23    1.03
   2  -1  42   13.39    1.89
   2  -1  41   35.14    3.22
   2  -1  40   46.73    3.98
   2  -1  39   37.23    4.08
   2  -1  38  224.38   10.48
   2  -1  37   32.08    4.43
   2  -1  36  168.82    9.02
  -2   1  36  157.72    7.72
   2  -1  35  193.02   10.43
  -2   1  35  188.05    8.87
   2  -1  34    0.82    4.46
  -2   1  34    1.19    2.58
   2   1 -34    2.74    3.90
   2  -1  33   40.80    5.61
   2   1 -33   38.75    5.32
  -2   1  33   47.13    4.22
   2  -1  32  191.92    8.75
   2  -1  32  182.32   10.58
   2   1 -32  182.15   10.50
  -2   1  32  201.68    9.47
   2  -1  31  154.43    7.87
   2   1 -31  169.34    9.61
   2  -1  31  164.33    9.76
  -2   1  31  162.01    8.42
   2  -1  30    3.47    2.57
   2  -1  30    1.89    4.36
   2   1 -30    0.97    3.52
  -2   1  30    4.10    3.04
   2  -1  29    8.04    2.82
   2  -1  29    2.98    4.01
   2   1 -29    6.15    3.78
  -2   1  29    6.03    2.87
   2   1 -28  304.30   12.85
   2  -1  28  293.99   12.65
   2  -1  28  275.20   13.77
   2   1 -28  286.48   13.61
  -2   1  28  286.74   12.92
   2   1 -27  235.50   10.94
   2  -1  27  226.21   10.85
   2   1 -27  257.39   11.97
   2  -1  27  247.84   11.96
   2   1 -26   51.04    4.28
   2  -1  26   46.47    4.30
   2   1 -26   44.62    4.80
   2  -1  26   53.05    5.15
   2   1 -25  174.94    8.53
   2  -1  25  168.98    8.49
   2   1 -25  164.74    8.91
   2  -1  25  154.91    9.09
   2   1 -24   49.86    4.44
   2  -1  24   55.94    4.67
   2   1 -24   64.44    5.04
   2  -1  24   58.68    5.32
   2  -1  23  128.89    7.16
   2   1 -23  142.04    7.27
   2  -1  23  123.86    7.66
   2   1 -23  128.75    7.42
   2   1 -22  157.17    8.04
   2  -1  22  152.18    8.13
   2   1 -22  173.85    8.62
   2  -1  22  178.93    8.92
   2   1 -21   50.33    4.03
   2  -1  21   46.37    4.21
   2   1 -21   53.37    4.37
   2  -1  21   59.02    4.72
   2   1 -20  214.39    9.51
   2  -1  20  204.29    9.65
   2  -1  20  205.39    9.95
   2   1 -19  876.37   31.22
   2  -1  19  832.19   31.35
   2  -1  19  874.70   31.89
   2   1 -18   94.00    5.46
   2  -1  18   93.11    5.64
   2   1 -18   76.09    7.92
   2   1 -17  148.68    6.96
   2  -1  17  143.27    7.16
   2   1 -17  126.88    6.88
   2  -1  17  161.49    7.67
   2   1 -17  116.95    9.23
   2   1 -17  144.01   10.53
  -2  -1 -17  146.13   10.34
   2   1 -16 1019.79   35.96
   2  -1  16  963.65   36.08
   2  -1  16 1081.41   36.61
   2   1 -16 1057.93   36.22
   2   1 -16  926.17   39.64
   2   1 -16  984.73   41.13
  -2  -1 -16  967.22   40.86
  -2   1  16  980.22   41.38
  -2   1  15  180.45   11.91
   2   1 -15  210.30   11.86
   2   1 -15  192.81   12.14
  -2  -1 -15  192.50   12.24
  -2   1  14 1666.04   61.61
   2   1 -14 1612.26   60.68
   2   1 -14 1607.70   61.64
  -2  -1 -14 1711.05   62.45
  -2   1  13  302.42   15.56
   2   1 -13  307.35   15.96
  -2  -1 -13  299.18   16.22
   2   1 -13  333.44   15.65
  -2   1  12  438.99   20.02
   2   1 -12  449.91   20.32
  -2  -1 -12  443.53   20.96
   2   1 -12  436.71   19.57
  -2   1  11  161.39    9.68
   2   1 -11  164.99   10.09
  -2  -1 -11  169.54   11.02
   2   1 -11  168.71    9.80
  -2   1  10  294.98   14.25
   2   1 -10  293.24   14.65
  -2  -1 -10  295.17   15.73
   2   1 -10  296.85   14.28
  -2   1   9  128.14    8.25
   2   1  -9  147.85    8.94
  -2  -1  -9  153.81   10.71
  -2  -1  -9  138.48    9.75
   2   1  -9  138.00    8.65
  -2   1   8  613.31   24.60
  -2   1   8  580.17   20.83
   2   1  -8  634.34   25.09
  -2  -1  -8  668.74   27.29
   2   1  -8  628.88   24.58
  -2  -1  -8  596.30   26.04
  -2   1   7  405.83   18.39
   2   1  -7  459.85   19.15
  -2   1   7  437.25   15.79
  -2  -1  -7  458.27   20.88
   2   1  -7  427.21   18.54
  -2  -1  -7  413.84   19.75
  -2   1   6 1327.55   44.64
  -2   1   6 1165.18   46.70
   2   1  -6 1320.77   47.11
   2   1  -6 1264.12   46.78
  -2  -1  -6 1171.91   47.63
  -2  -1  -6 1399.29   49.56
  -2   1   5   -0.33    2.31
  -2   1   5    3.32    1.85
  -2  -1  -5    0.89    3.08
  -2   1   4  659.04   26.24
  -2   1   4  635.97   24.63
  -2  -1  -4  668.40   25.93
  -2  -1  -4  676.56   27.57
  -2   1   3  191.64    9.20
  -2   1   3  190.68   10.36
  -2  -1  -3  201.40    9.91
  -2  -1  -3  206.33   11.52
  -2   1   2 2589.66   89.68
  -2   1   2 2601.22   91.39
  -2  -1  -2 2588.80   90.16
  -2  -1  -2 2664.76   92.37
  -2  -1  -1  546.64   22.39
  -2   1   1  503.61   20.26
  -2   1   1  512.69   21.68
  -2  -1  -1  518.72   20.30
  -2  -1   0 1105.60   41.74
  -2  -1   0 1081.00   39.65
  -2   1   0 1094.07   41.42
  -2   1   0 1126.58   40.03
  -2  -1   1  555.02   23.68
  -2  -1   1  573.36   21.79
  -2   1  -1  556.94   23.68
  -2   1  -1  584.65   22.54
  -2  -1   2 2717.86   97.57
  -2  -1   2 2782.50   95.30
  -2   1  -2 2769.28   97.78
  -2   1  -2 2804.28   96.39
  -2  -1   3  207.16    9.43
  -2  -1   3  196.32   11.37
  -2   1  -3  210.35   11.82
  -2  -1   4  631.26   24.45
  -2  -1   4  669.12   27.57
  -2   1  -4  685.37   27.74
  -2  -1   5    4.79    2.00
  -2  -1   5    5.78    3.35
  -2  -1   6 1197.42   43.50
   2  -1  -6 1264.06   46.92
  -2  -1   6 1201.07   46.72
  -2  -1   7  449.58   18.10
   2  -1  -7  449.01   20.86
  -2  -1   7  444.14   20.89
  -2  -1   8  646.15   24.71
   2  -1  -8  661.32   27.77
  -2   1  -8  582.04   26.63
  -2  -1   8  641.10   27.59
  -2  -1   9  184.63    9.53
  -2  -1   9  188.11   11.54
   2  -1  -9  177.14   11.49
  -2   1  -9  166.41   11.05
  -2  -1  10  320.52   14.58
  -2  -1  10  325.95   16.30
   2  -1 -10  323.25   16.79
  -2   1 -10  293.35   16.41
  -2   1 -10  296.30   17.92
  -2  -1  11  171.18   10.83
  -2   1 -11  172.80   11.80
   2  -1 -11  192.76   11.83
  -2   1 -11  129.97   11.68
  -2  -1  11  189.03   10.22
  -2   1 -12  356.99   20.39
   2  -1 -12  403.75   20.19
  -2  -1  12  416.01   19.17
  -2   1 -12  424.46   22.72
  -2  -1  12  421.06   18.87
  -2   1 -13  250.69   15.84
   2  -1 -13  247.47   14.97
  -2  -1  13  258.84   13.87
  -2   1 -13  260.27   16.98
  -2  -1  13  274.72   14.28
   2  -1 -14 1646.22   59.47
  -2   1 -14 1566.00   61.85
  -2  -1  14 1625.74   58.34
  -2   1 -15  189.20   14.12
   2  -1 -15  208.42   13.44
  -2   1 -15  189.27   14.46
  -2  -1  15  223.53   13.39
   2  -1 -16 1017.74   37.28
   2   1  16 1134.39   38.07
   2  -1 -16 1084.09   37.55
   2  -1 -16 1045.94   43.88
  -2   1 -16 1010.91   45.46
  -2  -1  16 1069.32   43.72
   2  -1 -17  128.38    6.39
   2  -1 -17  131.53    6.64
   2   1  17  139.19    7.13
  -2  -1  17  104.52    9.88
   2  -1 -18   84.88    5.12
   2  -1 -18  101.25    5.66
   2   1  18  102.43    6.10
   2  -1 -19  891.38   32.36
   2  -1 -19  904.49   32.70
   2  -1 -20  220.76    9.82
   2  -1 -20  214.59    9.92
   2   1  21   51.91    4.58
   2  -1 -21   49.99    4.06
   2  -1 -22  131.33    7.02
   2   1  22  135.39    7.52
   2   1  23   96.73    6.41
   2  -1 -23  107.37    6.15
   2   1  24   37.05    4.52
   2  -1 -24   40.01    3.98
   2   1  24   44.83    5.00
   2  -1 -25  176.99    8.59
   2   1  25  172.54    8.94
   2   1  25  153.97    9.31
   2  -1 -25  163.82    8.77
   2  -1 -26   50.62    4.41
   2   1  26   52.42    4.96
   2  -1 -26   47.47    4.75
   2   1  26   43.79    5.33
   2   1  27  258.30   12.19
   2  -1 -27  254.57   11.80
   2   1  27  267.58   12.95
   2  -1 -27  268.85   12.51
   2  -1 -28  302.48   12.93
   2   1  28  301.33   13.20
   2   1  28  272.34   13.89
   2  -1 -28  285.90   13.46
   2   1  29    7.29    3.52
   2  -1 -29    5.49    2.89
   2   1  29    1.02    4.10
   2  -1 -29    1.57    3.56
   2   1  30    4.69    3.23
   2  -1 -30    2.86    2.77
   2   1  30    4.31    4.51
   2  -1 -30    1.96    3.38
   2  -1 -31  152.98    8.10
   2   1  31  152.05    8.24
   2   1  31  160.39    9.66
   2  -1 -31  158.24    9.17
   2  -1 -32  213.43    9.77
   2   1  32  192.78    9.60
   2  -1 -32  196.91   10.79
   2   1  32  205.87   11.28
   2  -1 -33   73.37    4.99
   2   1  33   74.18    5.05
   2  -1 -33   62.33    6.24
   2   1  33   58.24    6.84
   2   1  34    1.14    2.36
   2   1  34    2.18    4.91
   2  -1 -34    1.87    4.29
   2   1  35  163.98    7.80
   2  -1 -35  181.78    9.79
   2   1  35  175.79   10.38
   2  -1 -36  156.03    8.68
   2   1  36  135.68    9.02
   2  -1 -37   42.81    5.04
   2   1  37   38.54    5.26
   2   1  38  240.85   11.38
   2  -1 -38  240.01   11.16
   2   1  39   40.63    4.54
   2   1  40   44.29    4.29
   2   1  41   27.97    3.22
   2   1  42    9.98    2.22
   2   1  43    4.82    1.49
   2   1  44    3.39    0.82
   2  -2  42    3.41    1.12
   2  -2  41   10.57    1.90
   2  -2  40   48.06    3.60
   2  -2  39  107.01    5.97
   2  -2  38   22.51    3.64
   2  -2  37  101.52    6.43
  -2   2  37  108.42    5.85
   2  -2  36   52.63    5.10
  -2   2  36   49.27    4.20
   2  -2  35   79.29    6.44
  -2   2  35   89.72    5.71
   2  -2  34   35.41    4.93
  -2   2  34   35.53    3.96
   2  -2  33   28.17    4.97
  -2   2  33   31.76    4.09
   2  -2  32   31.43    4.97
  -2   2  32   31.24    4.09
   2  -2  31   20.39    4.62
  -2   2  31   27.00    4.07
   2   2 -31   23.02    4.77
   2  -2  30   81.88    5.04
   2   2 -30   81.94    6.83
   2  -2  30   70.52    6.39
  -2   2  30   83.96    6.17
   2  -2  29  562.50   22.14
   2   2 -29  628.40   24.19
   2  -2  29  619.14   23.90
  -2   2  29  572.31   23.11
   2  -2  28   15.61    2.88
   2  -2  28    9.05    3.93
   2   2 -28   13.64    4.20
   2  -2  27   36.87    3.68
   2  -2  27   25.09    4.40
   2   2 -27   26.61    4.41
   2  -2  26   21.62    3.26
   2   2 -26   33.75    4.42
   2  -2  26   32.28    4.44
   2  -2  25  413.44   16.61
   2  -2  25  412.91   17.55
   2   2 -25  415.36   17.69
   2  -2  24    5.15    2.52
   2  -2  24    6.23    3.39
   2   2 -24    8.97    3.25
   2  -2  23  147.83    7.70
   2   2 -23  150.74    7.95
   2   2 -23  155.19    8.45
   2  -2  23  160.89    8.64
   2   2 -22   26.81    3.35
   2  -2  22   32.54    3.49
   2  -2  22   40.70    4.26
   2   2 -22   36.48    3.97
   2   2 -21  167.34    8.40
   2  -2  21  173.07    8.35
   2   2 -21  182.31    8.94
   2  -2  21  174.26    8.99
   2   2 -20  388.11   16.30
   2  -2  20  391.05   16.24
   2  -2  20  441.78   17.23
   2   2 -20  450.11   17.05
   2   2 -19  190.79    8.72
   2  -2  19  185.94    8.59
   2   2 -19  170.76    8.82
   2  -2  19  174.91    8.89
   2   2 -18  464.39   17.63
   2  -2  18  435.60   17.43
   2  -2  18  480.44   18.17
   2   2 -18  391.34   21.51
   2   2 -17  220.91    9.57
   2  -2  17  208.83    9.48
   2   2 -17  155.69   12.59
   2   2 -17  171.07   12.27
   2   2 -16  283.74   11.64
   2  -2  16  275.49   11.53
   2  -2  16  269.92   11.82
   2   2 -16  282.49   16.31
   2   2 -16  284.95   15.33
   2   2 -15  452.87   16.68
   2  -2  15  425.14   16.56
   2  -2  15  459.89   17.07
   2   2 -15  384.39   16.58
  -2   2  15  448.94   21.19
   2   2 -15  415.04   21.13
   2   2 -15  441.21   20.51
  -2   2  14  249.61   14.04
   2   2 -14  260.40   14.90
   2   2 -14  257.06   13.87
  -2  -2 -14  259.28   16.57
  -2  -2 -14  254.73   13.26
   2   2 -13  145.75   10.14
  -2   2  13  134.98    9.33
   2   2 -13  136.33    9.04
  -2  -2 -13  162.77   12.18
  -2  -2 -13  140.12    8.82
  -2   2  12 1087.05   43.34
   2   2 -12 1133.41   42.92
  -2  -2 -12 1189.91   47.00
  -2  -2 -12 1114.24   42.56
   2   2 -12 1138.18   44.43
  -2   2  11  560.76   25.04
   2   2 -11  605.56   24.71
  -2  -2 -11  639.18   28.66
  -2  -2 -11  573.48   24.50
   2   2 -11  620.98   26.33
  -2   2  10  356.95   17.27
   2   2 -10  386.26   16.86
  -2  -2 -10  374.40   19.79
  -2  -2 -10  371.71   16.86
   2   2 -10  371.50   17.98
  -2   2   9 1027.80   40.90
   2   2  -9 1093.85   40.31
  -2  -2  -9 1141.76   44.21
   2   2  -9 1037.47   42.06
  -2  -2  -9 1093.69   40.41
  -2  -2  -8   15.91    4.19
   2   2  -8   16.64    3.86
  -2  -2  -8   15.09    3.04
  -2   2   8   18.18    3.34
   2   2  -8   14.45    2.78
  -2   2   7   76.96    6.33
   2   2  -7   74.48    5.39
   2   2  -7   76.33    6.68
  -2  -2  -7   80.51    7.71
  -2  -2  -7   79.98    5.80
  -2   2   6  113.42    8.01
   2   2  -6  127.00    8.56
  -2  -2  -6  119.40    7.31
  -2  -2  -6  124.99    9.55
  -2   2   5  752.46   30.87
  -2  -2  -5  801.19   29.31
   2   2  -5  790.04   31.65
  -2  -2  -5  756.09   29.68
  -2  -2  -5  788.72   32.65
  -2   2   4  946.31   35.40
  -2  -2  -4  851.54   32.80
   2   2  -4  978.63   35.86
  -2  -2  -4  869.00   33.68
  -2  -2  -4  955.76   36.84
  -2  -2  -3  278.87   14.69
  -2   2   3  255.69   13.35
  -2  -2  -3  268.65   11.28
  -2  -2  -3  259.68   11.98
  -2  -2  -2  623.31   26.70
  -2   2   2  622.64   22.25
  -2   2   2  649.82   25.95
  -2  -2  -2  601.34   22.68
  -2   2   2  606.64   22.40
  -2  -2  -1  308.76   15.74
  -2  -2  -1  295.28   11.77
  -2   2   1  290.99   14.74
  -2   2   1  296.97   12.35
  -2   2   1  290.68   11.90
  -2  -2   0  677.24   28.78
  -2  -2   0  676.18   24.53
  -2   2   0  650.34   27.96
  -2   2   0  663.96   25.19
  -2   2   0  729.21   26.04
  -2  -2   1  306.81   11.92
  -2  -2   1  289.10   15.90
  -2   2  -1  292.20   15.35
  -2   2  -1  324.67   13.36
  -2   2  -1  312.11   13.75
  -2   2  -2  666.37   25.89
  -2  -2   2  644.81   23.38
  -2  -2   2  631.02   27.80
  -2   2  -2  664.31   27.78
  -2   2  -3  304.54   13.99
  -2  -2   3  282.91   11.36
  -2  -2   3  273.58   15.46
  -2   2  -3  300.05   15.64
  -2  -2   4  979.52   35.19
  -2   2  -4 1015.06   38.33
  -2  -2   4  985.44   40.49
  -2   2  -4 1040.67   40.28
  -2  -2   5  708.11   27.13
  -2   2  -5  776.76   30.50
  -2  -2   5  772.49   32.26
  -2   2  -5  810.80   32.49
  -2   2  -6  111.25    8.48
  -2  -2   6  113.93    9.68
  -2  -2   6  126.43    6.47
   2  -2  -7   78.40    7.80
  -2  -2   7   77.62    8.25
  -2  -2   7   81.85    5.26
  -2   2  -7   79.67    7.21
  -2   2  -8    9.82    3.70
  -2  -2   8   11.60    4.86
  -2  -2   8   12.89    2.52
   2  -2  -8   12.76    3.94
   2  -2  -9 1135.97   44.15
  -2  -2   9 1013.75   44.14
  -2   2  -9 1034.72   43.46
  -2  -2   9 1128.74   40.59
  -2  -2  10  380.98   20.35
   2  -2 -10  390.93   20.01
  -2   2 -10  382.85   19.99
  -2  -2  10  388.02   17.40
  -2  -2  11  600.51   27.72
   2  -2 -11  573.52   27.15
  -2   2 -11  618.65   30.04
  -2   2 -11  568.72   27.54
  -2  -2  11  605.60   24.99
  -2  -2  12 1075.15   45.42
   2  -2 -12 1159.63   45.88
  -2   2 -12 1116.69   48.40
  -2   2 -12 1032.75   45.81
  -2  -2  12 1169.84   43.46
  -2  -2  13  142.97   10.67
   2  -2 -13  144.00   11.01
  -2   2 -13  121.29   11.04
  -2   2 -13  157.77   13.41
  -2  -2  13  145.33    9.94
   2  -2 -14  266.65   16.00
  -2  -2  14  265.22   15.29
  -2   2 -14  226.68   16.02
  -2   2 -14  276.06   18.51
  -2  -2  14  247.41   14.71
   2  -2 -15  427.50   16.19
   2  -2 -15  434.62   22.48
  -2   2 -15  370.56   22.84
  -2   2 -15  419.71   24.50
   2  -2 -16  278.76   11.17
   2  -2 -16  254.22   11.18
   2   2  16  274.88   11.72
   2  -2 -17  252.47   10.47
   2   2  17  277.40   11.11
   2  -2 -18  459.36   18.01
   2  -2 -18  461.66   18.30
   2   2  18  495.48   18.90
   2  -2 -19  185.69    8.44
   2  -2 -19  168.09    8.52
   2   2  19  176.59    8.96
   2  -2 -20  387.08   16.32
   2  -2 -20  435.02   16.94
   2   2  20  445.88   17.46
   2  -2 -21  181.48    8.49
   2  -2 -21  167.74    8.67
   2   2  21  184.93    9.39
   2  -2 -22   31.56    3.41
   2  -2 -22   34.57    3.90
   2   2  22   39.81    4.36
   2  -2 -23  149.78    7.80
   2   2  23  148.79    8.70
   2   2  24    5.04    3.53
   2  -2 -24    6.09    2.40
   2   2  25  412.64   17.31
   2  -2 -25  409.11   16.77
   2  -2 -26   27.87    3.47
   2   2  26   27.44    4.30
   2  -2 -27   45.60    4.27
   2   2  27   39.66    4.82
   2  -2 -27   27.54    4.36
   2   2  28   20.69    4.27
   2  -2 -28   26.97    3.61
   2  -2 -28   14.08    3.98
   2  -2 -29  584.96   22.82
   2   2  29  593.19   23.28
   2  -2 -29  582.94   23.71
   2   2  30   90.68    6.45
   2  -2 -30   89.09    5.94
   2  -2 -30   82.92    6.64
   2  -2 -31   26.09    3.67
   2   2  31   24.99    4.16
   2   2  31   23.17    5.25
   2  -2 -31   19.08    4.55
   2   2  32   32.49    4.21
   2  -2 -32   32.51    3.80
   2   2  32   34.58    5.78
   2  -2 -32   30.28    4.93
   2  -2 -33   40.37    3.93
   2   2  33   36.93    4.24
   2   2  33   27.80    5.88
   2  -2 -33   35.36    5.16
   2  -2 -34   30.83    3.63
   2   2  34   36.66    3.88
   2   2  34   30.74    5.84
   2  -2 -34   34.55    5.27
   2   2  35   90.46    5.30
   2  -2 -35   82.64    6.90
   2   2  35   85.13    7.54
   2   2  36   46.46    3.60
   2  -2 -36   54.87    5.58
   2   2  36   50.20    5.94
   2  -2 -37  108.71    7.10
   2   2  37  114.14    7.55
   2   2  38   27.71    4.40
   2  -2 -38   27.13    4.10
   2   2  39  118.48    6.83
   2  -2 -39  116.11    6.67
   2   2  40   43.79    4.20
   2   2  41   12.86    2.75
   2   2  42    6.80    2.10
   2   2  43   16.41    1.80
  -2   3  42  117.27    4.74
   2  -3  41   22.11    1.74
   2  -3  40    4.00    1.59
   2  -3  39   14.61    2.35
   2  -3  38   18.22    2.87
  -2   3  38   19.57    2.84
   2  -3  37   39.90    3.87
  -2   3  37   35.55    3.76
   2  -3  36    9.32    3.20
  -2   3  36   11.42    3.08
   2  -3  35   18.53    3.61
  -2   3  35   22.61    3.64
   2  -3  34  176.71    9.60
  -2   3  34  204.04    9.74
   2  -3  33  107.09    7.16
  -2   3  33  124.29    7.37
   2  -3  32  261.79   12.39
  -2   3  32  258.53   12.11
   2  -3  31    2.71    3.72
  -2   3  31    5.55    3.60
   2  -3  30    2.21    3.76
  -2   3  30    1.90    3.51
   2  -3  29   -0.83    1.92
   2  -3  29   -1.68    3.43
  -2   3  29    0.97    3.37
   2  -3  28  110.38    5.91
   2  -3  28  101.15    7.35
   2  -3  27  636.00   24.33
   2  -3  27  689.96   26.01
   2  -3  26  214.64    9.53
   2  -3  26  199.78   10.63
   2  -3  25  102.23    5.74
   2  -3  25   87.52    6.61
   2  -3  24  541.05   20.69
   2  -3  24  542.92   21.78
   2   3 -24  544.20   22.09
   2  -3  23  218.19    9.57
   2   3 -23  202.72   10.48
   2  -3  23  198.74   10.36
   2  -3  22   57.67    4.16
   2  -3  22   45.04    4.68
   2   3 -22   46.37    4.60
   2  -3  21  106.55    6.19
   2  -3  21  131.61    7.32
   2   3 -21  119.47    7.26
   2  -3  20  473.95   17.91
   2   3 -20  462.21   18.73
   2  -3  20  442.28   18.51
   2  -3  19  119.32    6.55
   2   3 -19  143.66    7.47
   2  -3  19  138.82    7.43
   2  -3  18   15.49    2.53
   2  -3  18    9.89    2.68
   2   3 -18    9.92    2.61
   2  -3  17   78.18    4.85
   2   3 -17   83.85    5.45
   2  -3  17   93.05    5.63
   2   3 -17   68.93    8.27
   2  -3  16  251.44   10.25
   2   3 -16  199.31   10.41
   2  -3  16  260.05   10.86
   2   3 -16  248.19   16.22
   2  -3  15   85.15    4.84
   2  -3  15   95.20    5.43
   2   3 -15   76.28    8.31
   2   3 -15   75.34    6.46
   2  -3  14  120.73    6.19
   2  -3  14  148.52    6.92
   2   3 -14  103.44   10.22
   2   3 -14  125.18    8.31
   2   3 -13  473.35   23.62
  -2   3  13  485.69   22.37
   2   3 -13  468.51   20.59
  -2  -3 -13  491.57   25.29
   2   3 -12  131.31   10.54
  -2   3  12  152.87   10.02
   2   3 -12  146.19    8.59
  -2  -3 -12  155.68   12.41
  -2   3  11  222.49   12.78
   2   3 -11  223.35   11.26
  -2  -3 -11  238.95   15.24
   2   3 -11  233.90   14.48
  -2   3  10 1427.25   55.18
   2   3 -10 1463.29   52.95
  -2  -3 -10 1524.19   58.86
   2   3 -10 1514.88   57.19
  -2   3   9 1319.09   50.74
   2   3  -9 1359.03   48.29
  -2  -3  -9 1296.52   53.71
   2   3  -9 1374.31   52.35
  -2  -3  -8 1100.57   40.79
  -2   3   8 1157.44   44.47
   2   3  -8 1171.51   41.57
   2   3  -8 1286.13   46.51
  -2  -3  -8 1183.85   47.31
  -2  -3  -7  161.00    7.34
  -2   3   7  177.88   10.58
   2   3  -7  164.23   11.06
  -2  -3  -7  160.67   11.75
  -2  -3  -6  127.11    5.70
  -2   3   6  127.41    8.82
  -2  -3  -6  115.64    6.12
   2   3  -6  120.84    9.48
  -2  -3  -6  122.53   10.11
  -2  -3  -5  233.92    9.02
  -2  -3  -5  257.25   14.82
  -2   3   5  241.79   12.91
  -2  -3  -5  217.52    9.25
   2   3  -5  250.98   13.97
  -2  -3  -4  189.78    7.05
  -2  -3  -4  197.94   12.61
  -2   3   4  185.36   11.10
  -2  -3  -4  172.01    7.11
   2   3  -4  219.16   12.20
  -2  -3  -3  447.88   21.73
  -2   3   3  430.68   20.02
   2   3  -3  444.38   21.05
  -2  -3  -2   77.74    7.75
  -2   3   2   72.72    6.84
  -2  -3  -1  115.97    9.50
  -2   3   1  102.96    8.21
  -2   3   1  105.77    5.41
  -2   3   1  104.26    4.78
  -2  -3   0 1168.95   46.10
  -2   3   0 1149.17   44.90
  -2   3   0 1092.95   40.23
  -2   3   0 1231.33   41.92
  -2   3  -1  126.27    7.78
  -2  -3   1  109.32    9.64
  -2   3  -1  124.46    9.28
  -2   3  -2  141.56    8.75
  -2  -3   2  117.66   10.11
  -2   3  -2  121.04    9.47
  -2   3  -3  481.42   20.91
  -2  -3   3  418.81   22.89
  -2   3  -3  473.52   22.52
  -2   3  -4  197.41   11.40
  -2  -3   4  197.73   13.31
  -2   3  -4  195.60   12.67
  -2  -3   4  169.59    6.85
  -2   3  -5  267.39   14.16
  -2  -3   5  231.00   15.17
  -2   3  -5  263.12   15.13
  -2  -3   5  224.34    9.54
  -2   3  -6  155.70   10.80
  -2   3  -6  155.94   11.60
  -2  -3   6  157.87   12.14
  -2  -3   6  148.78    7.31
  -2   3  -7  177.05   11.99
  -2  -3   7  173.79   13.24
  -2  -3   7  166.67    8.44
  -2   3  -8 1131.81   43.55
   2  -3  -8 1032.43   43.07
  -2  -3   8 1119.72   45.69
  -2  -3   8  995.94   38.55
  -2   3  -9 1300.58   51.04
   2  -3  -9 1184.79   50.13
  -2  -3   9 1294.17   52.44
  -2   3 -10 1340.25   54.15
   2  -3 -10 1296.84   53.12
  -2  -3  10 1368.46   55.09
  -2  -3  11  212.24   14.90
  -2   3 -11  190.32   14.34
   2  -3 -11  229.99   14.63
  -2  -3  12  101.86    9.93
  -2   3 -12  109.31   10.73
   2  -3 -12   94.73    9.28
  -2   3 -12   97.34   10.83
  -2  -3  13  461.32   24.73
  -2   3 -13  456.08   25.58
   2  -3 -13  464.95   24.33
  -2   3 -13  488.68   27.24
   2  -3 -14  163.00    7.47
  -2   3 -14  162.18   14.03
  -2  -3  14  164.38   12.68
   2  -3 -15   76.59    4.82
   2  -3 -15   88.09    5.07
   2   3  15   89.46    5.33
   2  -3 -15   87.64    3.91
   2  -3 -16  213.06    9.62
   2  -3 -16  221.37    8.43
   2  -3 -16  213.30    9.69
   2   3  16  225.57   10.08
   2  -3 -17   79.38    4.93
   2   3  17   88.44    5.49
   2  -3 -17   82.73    5.16
   2  -3 -18   26.21    2.82
   2   3  18   23.63    3.34
   2  -3 -18   22.95    3.03
   2  -3 -19  113.72    6.25
   2   3  19  123.36    7.02
   2  -3 -20  512.04   19.28
   2  -3 -20  474.90   19.44
   2   3  20  488.90   19.92
   2  -3 -21  104.91    6.29
   2  -3 -21  125.64    6.89
   2   3  21  121.22    7.34
   2  -3 -22   56.30    4.34
   2  -3 -22   44.00    4.47
   2   3  22   47.44    4.72
   2  -3 -23  232.66   10.52
   2  -3 -23  217.98   10.81
   2   3  23  229.63   11.31
   2  -3 -24  537.68   21.06
   2   3  24  538.63   21.94
   2  -3 -25  104.75    6.43
   2   3  25   97.76    7.14
   2  -3 -26  192.09    9.45
   2   3  26  190.00   10.33
   2  -3 -27  696.63   26.47
   2   3  27  696.34   27.55
   2  -3 -28   86.77    5.89
   2   3  28   86.88    6.70
   2   3  28   79.37    6.82
   2   3  29   -0.18    3.53
   2  -3 -29   -0.08    2.52
   2   3  29   -0.82    4.31
   2  -3 -29    0.64    3.39
   2   3  30    3.06    3.81
   2  -3 -30    5.14    3.05
   2   3  30    3.66    4.68
   2  -3 -30    7.68    3.92
   2  -3 -31    7.09    2.93
   2   3  31    5.63    3.77
   2  -3 -31    3.08    4.02
   2  -3 -32  266.27   11.93
   2   3  32  267.66   12.39
   2  -3 -32  278.80   12.89
   2  -3 -33  122.00    6.76
   2   3  33  121.90    7.27
   2  -3 -33  113.74    7.96
   2  -3 -34  234.51   10.06
   2   3  34  219.40   10.25
   2  -3 -34  201.75   11.13
   2   3  35   21.16    3.23
   2  -3 -35   24.64    3.01
   2  -3 -35   24.89    4.56
   2   3  36   18.89    2.78
   2  -3 -36   10.66    3.99
   2   3  37   37.39    3.03
   2  -3 -37   42.77    4.60
   2  -3 -38   29.01    4.01
   2  -3 -39   15.63    3.29
   2   3  40    7.06    2.82
   2  -3 -40    7.46    2.61
   2   3  41   28.00    3.00
   2   3  42  254.48    9.98
   2   3  43    0.14    0.95
  -2   4  42   52.70    2.55
   2  -4  38   24.56    2.37
  -2   4  38   25.00    2.98
   2  -4  37   65.23    4.21
  -2   4  37   67.30    4.66
   2  -4  36    7.43    2.53
  -2   4  36    5.36    3.03
   2  -4  35    5.26    2.78
  -2   4  35    5.38    3.31
   2  -4  34   19.54    3.36
  -2   4  34   17.17    3.88
   2  -4  33   18.97    3.76
  -2   4  33   27.92    4.39
   2  -4  32   84.89    6.06
  -2   4  32  100.79    6.78
   2  -4  31   51.96    5.09
  -2   4  31   59.30    5.62
   2  -4  30   65.75    5.56
  -2   4  30   77.54    6.34
   2  -4  29  126.23    7.78
   2  -4  28   24.51    4.35
   2  -4  27   23.28    4.12
   2  -4  27   22.35    2.66
   2  -4  26    1.93    1.89
   2  -4  26    2.48    3.03
   2  -4  25  308.93   12.79
   2  -4  25  323.50   14.17
   2  -4  24  137.35    6.76
   2  -4  24  123.44    7.64
   2  -4  23    8.62    2.40
   2  -4  23   11.54    3.32
   2  -4  22   17.51    2.67
   2  -4  22   18.14    3.51
   2  -4  21  136.23    6.94
   2  -4  21  150.69    8.06
   2  -4  20   67.93    4.58
   2  -4  20   88.92    5.74
   2  -4  19  415.77   16.30
   2  -4  19  426.81   17.22
   2  -4  18  123.02    6.38
   2  -4  18  134.50    7.21
   2  -4  17  214.14    9.28
   2  -4  17  209.79    9.92
   2  -4  16  166.00    7.89
   2  -4  16  190.11    8.73
   2  -4  15  272.71   11.26
   2  -4  15  277.45   11.92
   2  -4  14  261.64   10.76
   2  -4  14  256.64   11.29
   2   4 -14  286.71   17.47
   2  -4  13  227.85    9.65
   2  -4  13  230.71   10.16
   2   4 -13  250.67   15.94
   2  -4  12 1135.40   41.12
   2  -4  12 1239.92   41.83
   2   4 -12 1140.75   48.67
  -2   4  11  663.50   28.07
   2   4 -11  608.54   24.01
  -2  -4 -11  634.76   30.83
   2   4 -11  666.84   30.49
  -2   4  10  101.32    8.07
   2   4 -10   92.53    5.22
   2   4 -10   96.26    9.06
  -2  -4 -10  106.95   10.10
  -2  -4  -9 1372.74   58.06
  -2   4   9 1441.18   54.93
   2   4  -9 1518.99   57.49
  -2  -4  -8 1912.14   74.05
  -2   4   8 1846.77   70.67
   2   4  -8 2037.29   73.67
  -2  -4  -7   78.37    8.21
  -2   4   7   69.21    6.65
   2   4  -7   82.41    8.07
  -2  -4  -6  179.15   13.02
  -2   4   6  182.60   11.52
   2   4  -6  190.64   12.60
  -2  -4  -5  598.40   28.63
  -2   4   5  621.17   26.60
   2   4  -5  575.38   27.48
  -2  -4  -4  560.40   27.77
  -2   4   4  574.74   25.80
   2   4  -4  617.81   27.34
  -2  -4  -3  351.87   19.64
  -2   4   3  328.70   17.28
   2   4  -3  359.71   18.63
  -2   4   2   39.74    5.32
  -2  -4  -2   31.20    6.09
   2   4  -2   33.11    5.54
  -2  -4  -1  877.75   38.23
  -2   4   1  864.40   36.01
  -2  -4   0  206.72   14.60
  -2   4   0  224.15   13.49
  -2  -4   1  849.20   38.70
  -2   4  -1  882.19   36.99
  -2   4  -1  894.43   33.54
  -2  -4   2   28.60    6.22
  -2   4  -2   31.52    4.25
  -2   4  -2   31.08    5.40
  -2  -4   3  364.25   21.33
  -2   4  -3  356.67   19.58
  -2   4  -3  376.16   18.20
  -2   4  -4  635.11   29.01
  -2  -4   4  553.60   29.48
  -2   4  -4  631.49   27.46
  -2   4  -5  570.85   28.04
  -2  -4   5  568.98   29.92
  -2   4  -5  627.56   27.71
  -2   4  -6  199.65   13.80
  -2  -4   6  186.78   14.69
  -2   4  -6  175.93   12.73
  -2   4  -7   77.67    8.48
  -2   4  -7   77.72    8.69
  -2  -4   7   70.84    9.31
  -2   4  -8 1899.64   75.08
  -2   4  -8 2101.10   76.51
  -2  -4   8 1839.14   76.74
  -2   4  -9 1447.42   58.85
  -2  -4   9 1407.21   59.87
  -2   4 -10   99.22   10.36
  -2  -4  10   91.41   10.40
   2  -4 -11  658.70   24.29
  -2  -4  11  654.51   33.27
  -2   4 -11  699.75   33.83
   2  -4 -12 1279.65   43.02
  -2   4 -12 1168.70   54.16
  -2  -4  12 1104.52   52.81
   2  -4 -13  260.86    9.70
  -2   4 -13  234.65   18.29
  -2  -4  13  243.77   17.49
   2  -4 -14  224.32   10.88
   2  -4 -14  261.14   11.08
   2  -4 -14  278.32    9.91
  -2  -4  14  267.04   18.15
   2  -4 -15  274.85   11.94
   2  -4 -15  279.20   12.06
   2  -4 -15  292.36   10.82
   2   4  15  296.00   12.22
   2  -4 -16  168.86    8.33
   2   4  16  188.98    8.79
   2  -4 -16  185.70    8.67
   2  -4 -17  224.45    9.76
   2   4  17  202.79    9.90
   2  -4 -17  211.58    9.80
   2  -4 -18  130.54    6.71
   2  -4 -18  132.87    7.03
   2   4  18  113.25    6.91
   2  -4 -19  425.12   16.26
   2   4  19  346.93   16.25
   2  -4 -19  426.21   16.53
   2  -4 -20   71.59    5.02
   2   4  20   80.81    5.76
   2  -4 -20   84.37    5.57
   2  -4 -21  135.05    7.25
   2  -4 -21  134.61    7.67
   2   4  21  133.28    7.85
   2  -4 -22   17.64    3.18
   2   4  22   24.00    3.86
   2  -4 -22   20.53    3.62
   2  -4 -23    5.01    2.61
   2   4  23    9.42    3.55
   2  -4 -23    7.33    3.14
   2  -4 -24  139.22    7.63
   2  -4 -24  134.22    7.91
   2   4  24  134.59    8.17
   2  -4 -25  329.70   14.22
   2  -4 -25  312.22   14.67
   2   4  25  352.76   15.16
   2   4  26    1.47    3.58
   2  -4 -26    2.02    2.63
   2  -4 -27   28.95    3.71
   2   4  27   25.59    4.95
   2  -4 -28   26.00    3.68
   2   4  28   26.87    4.84
   2  -4 -29  116.61    7.30
   2   4  29  139.45    8.48
   2   4  30   77.08    6.45
   2  -4 -30   81.24    5.69
   2   4  30   71.53    6.50
   2  -4 -31   60.78    4.94
   2   4  31   57.33    5.88
   2   4  31   61.46    6.15
   2  -4 -31   57.99    5.66
   2   4  32   95.31    6.71
   2  -4 -32   97.26    6.16
   2   4  32   96.57    7.38
   2  -4 -32   90.78    7.05
   2   4  33   30.36    4.26
   2  -4 -33   30.27    3.56
   2   4  33   24.72    4.81
   2  -4 -33   21.87    4.78
   2   4  34   16.50    3.54
   2  -4 -34   17.24    2.89
   2   4  34   21.02    4.90
   2  -4 -34   25.41    4.56
   2   4  35    3.25    2.77
   2  -4 -35    4.21    2.25
   2   4  35    5.30    4.21
   2  -4 -35    5.89    3.71
   2   4  36    4.87    2.42
   2  -4 -36    4.13    1.93
   2   4  36    6.07    3.60
   2  -4 -36    6.11    3.55
   2   4  37   70.64    4.14
   2   4  37   69.75    5.42
   2  -4 -37   71.34    5.33
   2   4  38   27.67    2.29
   2  -4 -38   29.00    3.73
   2   4  38   26.01    3.76
   2  -4 -39   98.84    5.64
   2   4  39   92.60    5.58
   2  -4 -40   64.97    4.11
   2   4  40   54.63    4.03
   2   4  41    1.36    1.78
   2   4  42   89.26    4.13
  -2   5  38   35.18    3.26
  -2   5  37   51.42    4.19
  -2   5  36   30.58    3.75
   2  -5  35   39.77    3.19
  -2   5  35   42.98    4.43
   2  -5  34    9.64    2.44
  -2   5  34    7.23    3.66
   2  -5  33   26.88    3.35
  -2   5  33   37.37    4.92
   2  -5  32   15.10    3.15
  -2   5  32   15.91    4.43
   2  -5  31   66.64    5.05
  -2   5  31   81.54    6.47
   2  -5  30   39.00    4.11
  -2   5  30   28.47    5.06
   2  -5  29  191.51    9.58
   2  -5  28   75.39    5.60
   2  -5  27   97.56    6.45
   2  -5  26  146.80    8.15
   2  -5  25  303.09   13.98
   2  -5  25  337.42   12.96
   2  -5  24  382.23   15.29
   2  -5  24  335.69   13.79
   2  -5  23  108.04    6.70
   2  -5  23  107.62    5.70
   2  -5  22    6.78    2.04
   2  -5  22    3.49    2.74
   2  -5  21  511.80   20.89
   2  -5  21  542.51   19.94
   2  -5  20   37.71    4.06
   2  -5  20   41.80    3.39
   2  -5  19  283.47   12.21
   2  -5  19  267.34   11.24
   2  -5  18   72.41    5.17
   2  -5  18   77.91    4.57
   2  -5  17  114.94    6.54
   2  -5  17  114.58    5.89
   2  -5  16  346.74   14.22
   2  -5  16  336.01   13.42
   2  -5  15   16.54    2.70
   2  -5  15   24.62    2.53
   2  -5  14  121.78    6.56
   2  -5  14  126.91    6.10
   2  -5  13  226.79   10.30
   2  -5  13  243.93    9.85
   2  -5  12  287.24   12.00
   2  -5  12  287.44   11.44
   2  -5  11 2291.35   77.54
   2  -5  11 2223.15   76.92
   2  -5  10   41.56    3.18
   2  -5  10   25.30    2.51
   2   5  -9  465.31   23.82
   2  -5   9  410.00   15.55
   2   5  -8 1309.52   54.00
   2  -5   8 1314.00   45.44
  -2  -5  -7  313.44   18.75
  -2   5   7  303.39   16.02
   2   5  -7  346.97   18.42
  -2  -5  -6  884.77   41.30
  -2   5   6  914.20   38.26
   2   5  -6  950.78   40.13
  -2  -5  -5  683.18   34.16
  -2   5   5  697.30   31.15
   2   5  -5  762.46   33.20
  -2  -5  -4  196.66   15.10
  -2   5   4  223.12   13.59
   2   5  -4  232.62   15.06
  -2  -5  -3  141.40   12.62
  -2   5   3  141.12   10.34
   2   5  -3  142.77   11.33
  -2  -5  -2  384.87   22.87
  -2   5   2  406.66   20.68
   2   5  -2  434.21   22.00
  -2  -5  -1 1352.51   57.85
  -2   5   1 1435.84   55.15
  -2  -5   0  388.29   23.18
  -2   5   0  403.62   20.81
  -2   5  -1 1200.88   49.42
  -2  -5   1 1261.64   53.61
  -2   5  -2  362.43   19.98
  -2  -5   2  370.55   22.75
  -2   5  -3  123.48   10.48
  -2  -5   3  111.64   11.65
  -2   5  -4  236.38   15.26
  -2  -5   4  203.85   16.43
  -2   5  -5  835.46   35.98
  -2  -5   5  677.57   36.67
  -2   5  -6 1041.02   44.00
  -2  -5   6  913.40   45.01
  -2   5  -7  382.26   20.18
  -2  -5   7  343.28   21.23
   2  -5  -8 1430.42   48.35
  -2  -5   8 1246.19   59.98
   2  -5  -9  371.71   14.55
   2  -5  -9  367.31   13.39
  -2  -5   9  346.32   23.28
   2  -5 -10   31.11    2.90
   2  -5 -11 2379.39   82.02
   2  -5 -11 2390.81   81.25
   2  -5 -12  262.72   12.09
   2  -5 -12  317.99   12.55
   2  -5 -12  308.91   11.75
   2  -5 -13  252.16    9.75
   2  -5 -13  250.95   11.04
   2  -5 -13  262.07   10.44
   2  -5 -14  138.01    5.83
   2  -5 -14  133.46    7.09
   2   5  14  131.68    6.74
   2  -5 -14  132.38    6.40
   2  -5 -15    9.69    1.94
   2  -5 -15   14.29    2.57
   2  -5 -15   12.68    1.81
   2   5  15    8.54    2.14
   2  -5 -15   10.10    2.54
   2  -5 -16  321.39   13.56
   2  -5 -16  335.96   13.72
   2   5  16  331.25   13.59
   2  -5 -16  305.89   12.84
   2  -5 -17  103.95    6.24
   2  -5 -17  110.20    6.43
   2   5  17  111.56    6.41
   2  -5 -18   80.84    5.24
   2  -5 -18   70.58    5.20
   2   5  18   73.29    5.23
   2  -5 -19  225.07   10.95
   2  -5 -19  250.25   11.34
   2   5  19  260.17   11.39
   2  -5 -20   40.50    4.17
   2   5  20   43.06    4.32
   2  -5 -20   40.25    4.25
   2  -5 -21  531.37   21.55
   2   5  21  560.49   21.97
   2  -5 -21  562.83   21.94
   2  -5 -22    9.15    3.05
   2   5  22   11.11    3.32
   2  -5 -22   10.59    3.39
   2  -5 -23   79.92    5.77
   2   5  23   94.33    6.44
   2  -5 -23   85.02    6.26
   2   5  24  429.63   17.19
   2  -5 -24  422.70   17.00
   2  -5 -25  368.18   15.09
   2  -5 -25  336.73   15.18
   2   5  25  335.93   15.33
   2  -5 -26  142.66    8.02
   2  -5 -26  138.04    8.37
   2   5  26  146.92    8.60
   2  -5 -27  125.87    7.29
   2  -5 -27  109.74    7.44
   2   5  27  107.64    7.57
   2  -5 -28   77.60    5.77
   2   5  28   75.27    6.39
   2  -5 -29  236.01   10.63
   2   5  29  202.00   11.11
   2  -5 -30   29.40    3.92
   2   5  30   34.04    4.83
   2  -5 -31   66.21    5.04
   2   5  31   65.75    6.08
   2   5  31   56.98    5.62
   2   5  32   12.12    4.15
   2  -5 -32   10.53    2.99
   2   5  32    9.91    4.18
   2  -5 -33   38.29    3.73
   2   5  33   33.71    4.49
   2   5  33   28.46    4.47
   2  -5 -33   33.34    4.70
   2   5  34    8.12    3.32
   2  -5 -34    9.48    2.56
   2   5  34   11.24    3.77
   2  -5 -34    8.45    3.87
   2  -5 -35   45.76    3.50
   2   5  35   44.24    4.19
   2  -5 -35   35.23    4.63
   2   5  35   42.22    4.54
   2  -5 -36   34.23    2.85
   2   5  36   35.65    3.36
   2   5  36   33.20    4.04
   2  -5 -36   32.42    4.06
   2  -5 -37   54.41    3.25
   2   5  37   51.14    3.48
   2   5  37   48.22    4.31
   2  -5 -37   55.77    4.48
   2   5  38   31.60    2.37
   2   5  38   37.84    3.48
   2  -5 -38   33.72    3.53
   2   5  39  138.99    6.51
   2  -5 -39  139.46    6.75
   2   5  40    7.11    1.83
   2  -5 -40    8.17    1.95
   2   5  41   36.53    2.22
  -2   6  37    3.99    2.38
  -2   6  36   13.40    3.19
  -2   6  35   12.76    3.23
  -2   6  34   22.79    3.87
  -2   6  33   20.47    4.25
  -2   6  32   13.48    4.32
  -2   6  31   47.94    5.56
  -2   6  30  198.95   10.56
   2  -6  29  127.19    6.74
  -2   6  29  120.04    8.02
   2  -6  28   30.89    3.52
   2  -6  27  101.16    6.05
   2  -6  26   36.29    3.79
   2  -6  25   59.44    4.66
   2  -6  24  113.06    6.57
   2  -6  24  109.20    5.45
   2  -6  23   28.22    3.57
   2  -6  23   43.01    3.12
   2  -6  22  340.53   13.48
   2  -6  22  289.68   12.10
  -2  -6 -22  303.87   14.12
   2  -6  21  324.39   14.00
   2  -6  21  341.20   13.12
  -2  -6 -21  321.45   15.05
   2  -6  20   33.04    3.59
   2  -6  20   22.82    2.56
  -2  -6 -20   29.27    4.13
   2  -6  19  161.28    8.23
   2  -6  19  163.36    7.42
  -2  -6 -19  162.20    9.42
   2  -6  18   92.85    5.56
   2  -6  18   75.22    4.56
  -2  -6 -18   80.32    6.44
   2  -6  17  153.25    7.98
   2  -6  17  167.10    7.41
  -2  -6 -17  164.58    9.46
   2  -6  16  126.05    6.61
   2  -6  16  109.78    5.71
  -2  -6 -16  118.35    7.72
   2  -6  15  129.80    6.87
   2  -6  15  131.51    6.26
  -2  -6 -15  130.01    8.12
   2  -6  14    9.01    1.99
   2  -6  14    5.80    2.10
  -2  -6 -14    4.99    2.99
   2  -6  13   92.78    5.31
   2  -6  13   87.90    4.78
  -2  -6 -13   89.94    6.41
   2  -6  12    3.09    1.67
   2  -6  12    2.78    1.78
  -2  -6 -12    2.06    2.54
   2  -6  11  226.47    9.92
   2  -6  11  223.52    9.37
  -2  -6 -11  241.90   11.41
   2  -6  10  829.85   29.04
   2  -6  10  774.64   28.29
   2  -6   9  137.87    7.23
   2  -6   9  179.85    7.18
   2  -6   8 2111.41   71.34
   2  -6   8 2042.99   70.75
   2  -6   7   39.92    2.98
   2  -6   7   20.51    2.18
   2  -6   6  246.66   10.10
   2  -6   6  239.02    9.60
   2  -6   5  210.87    8.45
   2  -6   5  234.80    9.15
   2  -6   5  192.15    8.36
   2  -6   4   60.75    3.53
   2  -6   4   69.32    3.61
   2  -6   3  167.06    6.82
   2  -6   3  151.73    6.66
   2  -6   2  140.15    6.05
   2  -6   2  138.10    6.01
   2  -6   1  148.04    6.24
   2  -6   1  140.26    6.17
   2  -6   0   15.47    1.81
   2  -6  -1  145.83    6.21
   2  -6  -2  149.38    6.27
   2  -6  -3  149.74    6.40
   2  -6  -4   77.90    4.49
   2  -6  -4   68.49    3.59
   2  -6  -4   74.19    3.87
   2  -6  -5  186.78    9.06
   2  -6  -5  229.82    8.36
   2  -6  -5  207.62    8.52
   2  -6  -6  240.77   10.44
   2  -6  -6  247.63    9.37
   2  -6  -6  243.04    9.76
   2  -6  -7   13.73    2.35
   2  -6  -7   31.92    2.14
   2  -6  -7   23.41    2.29
   2  -6  -8 2067.78   73.55
   2  -6  -8 2184.73   72.18
   2  -6  -8 2092.58   72.80
   2  -6  -9  192.80    8.72
   2  -6  -9  175.79    7.21
   2  -6  -9  180.23    7.81
   2  -6 -10  744.56   29.65
   2  -6 -10  822.75   29.84
   2  -6 -10  841.91   28.38
   2  -6 -10  813.06   29.04
   2  -6 -11  244.35   10.60
   2  -6 -11  235.41   10.51
   2  -6 -11  231.20    9.13
   2  -6 -11  236.79    9.89
   2  -6 -12    3.82    1.82
   2  -6 -12    5.40    2.40
   2  -6 -12    3.60    1.43
   2  -6 -12    2.43    2.00
   2  -6 -13   96.66    5.79
   2  -6 -13   93.63    5.26
   2  -6 -14    5.64    2.09
   2  -6 -14    5.76    2.31
   2  -6 -15  140.88    7.43
   2  -6 -15  136.49    7.46
   2  -6 -15  135.79    6.94
   2  -6 -16  117.26    6.87
   2   6  16  128.58    6.57
   2  -6 -16  131.09    7.19
   2  -6 -16  115.83    6.42
   2  -6 -17  163.95    8.53
   2   6  17  157.77    7.94
   2  -6 -17  161.13    8.46
   2  -6 -18   77.53    5.65
   2  -6 -18   85.72    5.82
   2   6  18   90.77    5.57
   2  -6 -19  169.16    8.74
   2  -6 -19  162.22    8.73
   2   6  19  166.43    8.49
   2  -6 -20   24.73    3.68
   2   6  20   31.14    3.63
   2  -6 -20   28.99    3.98
   2  -6 -21  332.59   14.57
   2  -6 -21  333.44   14.80
   2   6  21  340.45   14.51
   2  -6 -22  296.64   14.01
   2   6  22  341.56   14.29
   2  -6 -22  337.65   14.61
   2  -6 -23   49.94    4.81
   2   6  23   34.57    4.20
   2  -6 -23   36.41    4.57
   2  -6 -24  111.01    7.06
   2   6  24  121.48    7.28
   2  -6 -24  116.62    7.54
   2  -6 -25   70.79    5.45
   2   6  25   61.20    5.25
   2  -6 -25   56.62    5.64
   2  -6 -26   51.17    4.80
   2  -6 -26   51.67    5.19
   2   6  26   44.84    4.80
   2  -6 -27  100.15    6.66
   2  -6 -27  103.91    7.18
   2   6  27  106.92    6.89
   2  -6 -28   31.73    4.17
   2   6  28   25.35    4.07
   2  -6 -28   28.58    4.65
   2  -6 -29  119.00    7.24
   2  -6 -29  127.21    7.89
   2   6  29  138.24    7.93
   2  -6 -30  200.29    9.49
   2   6  30  184.78    9.72
   2  -6 -31   42.03    4.25
   2   6  31   47.05    4.78
   2   6  32   15.76    4.25
   2   6  32   14.88    3.55
   2  -6 -32   12.06    3.06
   2   6  33   22.99    3.99
   2  -6 -33   22.95    2.97
   2   6  33   19.10    3.55
   2   6  34   25.50    3.84
   2  -6 -34   24.86    2.91
   2   6  34   21.45    3.55
   2   6  35    9.84    2.88
   2  -6 -35   12.95    2.12
   2   6  35   12.22    2.89
   2  -6 -36   13.50    1.93
   2   6  36   12.09    2.49
   2   6  36   14.54    2.68
   2  -6 -36   11.57    3.05
   2   6  37    2.34    1.74
   2  -6 -37    2.52    1.16
   2   6  37    2.25    2.11
   2  -6 -37    2.12    2.38
   2   6  38   10.58    1.37
   2   6  38    9.84    1.93
   2  -6 -38    9.96    2.37
   2   6  39   50.09    2.89
   2  -6 -39   54.58    3.40
   2  -6 -40   22.65    1.98
  -2   7  37    7.38    2.09
  -2   7  36   11.10    2.55
  -2   7  35   36.66    3.68
  -2   7  34   52.32    4.42
  -2   7  33  146.78    7.82
  -2   7  32  116.62    7.17
  -2   7  31    2.91    4.02
  -2   7  30   56.80    5.90
  -2   7  29   12.08    4.46
  -2  -7 -26   66.50    5.20
  -2  -7 -25   23.69    3.82
  -2  -7 -24   79.59    6.16
   2  -7  23  917.29   32.73
  -2  -7 -23  972.67   35.49
   2  -7  22   73.67    4.02
  -2  -7 -22   52.80    5.61
   2  -7  21  359.12   14.00
  -2  -7 -21  386.61   16.89
   2  -7  20  225.66    9.13
  -2  -7 -20  197.23   11.41
  -2  -7 -19  484.08   21.16
   2  -7  19  492.60   18.24
  -2  -7 -18  309.59   14.95
   2  -7  18  303.19   12.04
   2  -7  17  377.78   14.56
  -2  -7 -17  387.44   17.49
   2  -7  16   87.37    4.74
  -2  -7 -16   88.80    7.10
   2  -7  15  445.56   16.58
  -2  -7 -15  424.14   19.36
   2  -7  14  102.39    5.15
  -2  -7 -14   93.08    7.30
   2  -7  13  116.54    5.74
  -2  -7 -13  129.47    8.20
   2  -7  12  281.43   11.22
  -2  -7 -12  285.04   13.62
   2  -7  11  167.09    8.06
   2  -7  11  189.13    7.81
  -2  -7 -11  184.30    9.99
   2  -7  10   88.14    4.95
   2  -7  10   87.55    4.63
  -2  -7  -9   93.90    5.60
   2  -7   9   98.90    5.23
   2  -7   9   93.89    4.67
   2  -7   9   96.92    4.88
  -2  -7  -8   50.41    4.07
   2  -7   8   59.44    3.37
   2  -7   8   52.74    3.41
   2  -7   7  584.30   20.88
   2  -7   7  576.24   21.02
   2  -7   6    0.77    1.38
   2  -7   6    3.07    1.47
   2  -7   5  125.08    5.78
   2  -7   5  139.43    6.03
   2  -7   4  892.83   31.62
   2  -7   4  920.69   31.84
   2  -7   3  157.38    6.63
   2  -7   3  155.69    6.76
   2  -7   2   81.15    4.68
   2  -7   2   84.02    4.17
   2  -7   2   90.42    4.42
   2  -7   1   91.39    5.16
   2  -7   1   99.45    4.58
   2  -7   1   97.14    4.75
   2  -7   0   24.66    2.54
   2  -7   0   20.43    1.96
   2  -7   0   25.11    2.26
   2  -7  -1   86.01    5.03
   2  -7  -1   87.55    4.20
   2  -7  -1   89.34    4.50
   2  -7  -2   80.56    4.82
   2  -7  -2   79.68    3.92
   2  -7  -3  178.52    8.62
   2  -7  -3  191.09    7.52
   2  -7  -4  930.39   33.69
   2  -7  -4  931.30   32.28
   2  -7  -5  168.86    8.06
   2  -7  -5  161.38    6.73
   2  -7  -5  166.51    7.31
   2  -7  -6    1.91    1.70
   2  -7  -6    1.98    2.09
   2  -7  -6    4.75    1.37
   2  -7  -7  567.17   22.02
   2  -7  -7  574.26   20.49
   2  -7  -7  586.72   21.25
   2  -7  -8   59.85    4.64
   2  -7  -8   63.76    3.42
   2  -7  -8   63.48    4.11
   2  -7  -9   78.89    5.27
   2  -7  -9   83.21    4.06
   2  -7  -9   84.13    5.22
   2  -7  -9   75.37    4.74
   2  -7 -10   81.82    5.40
   2  -7 -10   80.72    5.25
   2  -7 -10   84.76    4.16
   2  -7 -10   78.91    4.94
   2  -7 -11  175.24    9.07
   2  -7 -11  179.78    7.56
   2  -7 -11  190.83    9.09
   2  -7 -11  189.75    8.54
   2  -7 -12  270.87   12.29
   2  -7 -12  271.18   12.17
   2  -7 -12  270.96   10.70
   2  -7 -12  286.14   11.78
   2  -7 -13  114.50    6.61
   2  -7 -13   99.99    6.00
   2  -7 -14   90.45    6.02
   2  -7 -14  100.72    5.89
   2  -7 -15  434.66   17.16
   2  -7 -15  386.81   16.38
   2  -7 -16   69.06    5.52
   2  -7 -16   80.51    5.65
   2  -7 -17  448.24   18.14
   2  -7 -17  434.63   18.20
   2  -7 -18  344.97   15.00
   2  -7 -18  352.21   15.19
   2  -7 -19  591.84   22.42
   2  -7 -19  556.87   22.32
   2   7  19  543.79   21.39
   2  -7 -20  205.95    9.89
   2  -7 -20  179.21    9.55
   2   7  20  171.66    8.72
   2  -7 -21  347.76   16.17
   2  -7 -21  414.94   16.83
   2   7  21  400.39   15.91
   2  -7 -22   89.95    6.16
   2  -7 -22   63.37    5.60
   2   7  22   64.65    4.99
   2  -7 -23  956.68   35.07
   2   7  23  943.57   34.67
   2  -7 -23  935.76   35.38
   2  -7 -24   76.73    6.10
   2   7  24   82.94    5.65
   2  -7 -24   82.14    6.18
   2  -7 -25   23.72    4.05
   2   7  25   20.79    3.32
   2  -7 -25   19.10    4.24
   2  -7 -26   47.07    4.98
   2  -7 -26   62.95    5.57
   2   7  26   55.84    4.78
   2  -7 -27  161.25    8.74
   2  -7 -27  168.64    9.28
   2   7  27  164.98    8.43
   2  -7 -28  133.01    7.30
   2  -7 -28  130.20    7.93
   2   7  28  112.78    6.86
   2  -7 -29    7.48    3.26
   2   7  29    7.40    2.83
   2  -7 -29   10.86    3.80
   2  -7 -30   83.32    5.36
   2  -7 -30   70.13    5.92
   2   7  30   66.62    5.03
   2  -7 -31    2.11    2.57
   2   7  31   -0.12    2.47
   2  -7 -31   -0.29    3.29
   2  -7 -32  125.02    6.50
   2   7  32  128.71    7.30
   2   7  32  110.01    6.25
   2  -7 -33  158.29    7.15
   2   7  33  156.30    7.98
   2   7  33  134.24    7.05
   2  -7 -34   52.17    3.49
   2   7  34   49.17    4.20
   2   7  34   41.76    3.53
   2  -7 -35   46.24    3.00
   2   7  35   46.67    3.77
   2   7  35   37.91    3.05
   2   7  36   10.49    2.10
   2  -7 -36    7.31    1.40
   2   7  36    5.95    1.56
   2   7  37    3.71    1.38
   2   7  37    2.99    1.14
   2  -7 -39   30.55    2.08
  -2  -8 -28   42.03    3.59
  -2   8  28   34.61    4.89
  -2  -8 -27   -0.14    2.60
  -2   8  27    2.52    3.81
  -2  -8 -26   35.59    4.09
  -2  -8 -25   44.62    4.66
  -2  -8 -24  150.82    8.86
  -2  -8 -23  113.50    7.80
  -2  -8 -22   72.70    6.46
  -2  -8 -21  138.42    8.98
   2  -8  21  131.97    6.08
   2  -8  20   28.88    2.56
  -2  -8 -20   29.27    5.19
   2  -8  19   37.71    2.91
  -2  -8 -19   39.70    5.31
   2  -8  18   81.55    4.46
  -2  -8 -18   85.03    7.38
   2  -8  17   46.07    3.29
  -2  -8 -17   47.03    5.93
   2  -8  16  102.67    5.22
  -2  -8 -16   94.63    8.04
   2  -8  15   57.93    3.71
  -2  -8 -15   54.05    6.40
   2  -8  14   24.04    2.54
  -2  -8 -14   19.91    4.65
   2  -8  13  512.22   19.10
  -2  -8 -13  532.14   22.33
   2  -8  12  268.60   10.87
  -2  -8 -12  276.79   13.79
  -2  -8 -11  168.07    8.65
   2  -8  11  171.94    7.55
  -2  -8 -11  174.46   10.26
  -2  -8 -10  276.13   12.41
   2  -8  10  283.20   11.22
  -2  -8 -10  282.67   14.14
  -2  -8  -9  124.03    7.14
   2  -8   9  130.74    6.10
  -2  -8  -8  294.21   13.23
   2  -8   8  311.60   12.02
  -2  -8  -7  299.61   13.45
   2  -8   7  313.23   11.78
   2  -8   7  320.64   12.29
  -2  -8  -6   45.77    4.15
   2  -8   6   39.47    2.62
   2  -8   6   40.94    3.07
   2  -8   5  159.19    6.58
   2  -8   5  155.73    7.06
   2  -8   4   19.33    1.91
   2  -8   4   18.82    2.24
   2  -8   3  340.53   11.99
   2  -8   3  340.08   12.55
   2  -8   2   41.08    3.49
   2  -8   2   49.30    2.87
   2  -8   2   50.98    3.38
   2  -8   1  234.14   10.73
   2  -8   1  262.37    9.71
   2  -8   1  248.61   10.26
   2  -8   0   16.25    2.49
   2  -8   0   14.11    1.75
   2  -8   0   15.05    2.22
   2  -8  -1  239.27   11.13
   2  -8  -1  275.11    9.99
   2  -8  -1  252.11   10.59
   2  -8  -2   52.46    4.13
   2  -8  -2   49.65    2.94
   2  -8  -2   54.68    3.69
   2  -8  -3  321.12   13.72
   2  -8  -3  335.14   12.22
   2  -8  -3  318.41   12.93
   2  -8  -4   20.59    1.91
   2  -8  -4   15.00    2.72
   2  -8  -5  171.79    8.52
   2  -8  -5  166.96    6.94
   2  -8  -6   40.16    3.91
   2  -8  -6   40.86    2.78
   2  -8  -7  311.17   13.51
   2  -8  -7  323.76   11.93
   2  -8  -7  298.79   12.84
   2  -8  -8  315.28   13.57
   2  -8  -8  308.82   11.85
   2  -8  -8  309.34   12.87
   2  -8  -9  126.46    7.37
   2  -8  -9  136.94    6.05
   2  -8  -9  134.77    7.04
   2  -8  -9  135.54    7.34
   2  -8 -10  278.59   12.43
   2  -8 -10  267.81   10.67
   2  -8 -10  276.94   12.21
   2  -8 -10  272.49   11.85
   2  -8 -11  187.70    9.33
   2  -8 -11  174.06    8.96
   2  -8 -11  174.97    8.71
   2  -8 -12  257.62   12.27
   2  -8 -12  282.80   12.39
   2  -8 -12  266.78   11.92
   2  -8 -13  502.90   20.12
   2  -8 -13  494.96   19.66
   2  -8 -14   20.11    3.63
   2  -8 -14   19.68    3.39
   2  -8 -15   60.52    5.09
   2  -8 -16  102.49    7.04
   2  -8 -16  106.63    6.71
   2  -8 -17   45.15    4.98
   2  -8 -17   55.17    4.99
   2  -8 -18   72.63    5.97
   2  -8 -18   78.47    5.87
   2  -8 -19   33.46    4.53
   2  -8 -19   42.04    4.39
   2  -8 -20   37.89    4.87
   2  -8 -20   30.52    4.30
   2  -8 -21  134.51    7.93
   2  -8 -21  133.45    8.04
   2  -8 -22   50.51    5.40
   2  -8 -22   73.10    5.76
   2  -8 -23  144.11    7.92
   2  -8 -23  110.60    7.54
   2  -8 -24  138.17    8.37
   2  -8 -24  154.69    8.66
   2   8  24  146.63    7.26
   2  -8 -25   48.37    4.82
   2   8  25   40.30    3.50
   2  -8 -25   41.65    4.70
   2  -8 -26   38.10    4.54
   2   8  26   35.69    3.25
   2  -8 -26   37.82    4.58
   2  -8 -27    4.49    3.33
   2   8  27    1.63    1.90
   2  -8 -27    1.02    3.38
   2  -8 -28   41.32    4.49
   2  -8 -28   42.88    4.74
   2   8  28   38.76    3.33
   2  -8 -29    9.25    3.10
   2   8  29    9.18    2.19
   2  -8 -29   12.69    3.40
   2  -8 -30   42.49    3.84
   2  -8 -30   42.07    4.38
   2   8  30   33.44    2.97
   2  -8 -31   25.08    3.07
   2   8  31   19.46    2.25
   2  -8 -31   20.31    3.51
   2   8  32   30.67    4.07
   2  -8 -32   25.49    2.83
   2  -8 -32   28.16    3.52
   2   8  32   23.77    2.24
   2   8  33   23.76    3.47
   2  -8 -33   22.47    2.50
   2   8  33   19.35    1.86
   2  -8 -33   23.83    3.12
   2  -8 -34   22.04    2.14
   2   8  34   21.58    2.95
   2  -8 -34   21.20    2.87
   2  -8 -35   30.39    2.10
   2   8  35   31.78    2.85
   2  -8 -35   29.94    2.84
   2   8  36    9.43    1.55
  -2   9  34   46.30    3.04
  -2   9  33   39.69    3.15
  -2   9  32    0.72    2.15
  -2   9  31   16.11    2.90
  -2   9  30  138.93    7.21
  -2  -9 -29   12.16    2.18
  -2   9  29   11.00    3.36
  -2  -9 -28   18.15    2.72
  -2   9  28   23.60    3.81
  -2  -9 -27   33.28    3.57
  -2   9  27   37.67    4.39
  -2  -9 -26  103.73    6.38
  -2   9  26  103.73    6.81
  -2  -9 -25   25.95    3.94
  -2   9  25   24.50    4.23
  -2  -9 -24   49.79    5.18
  -2  -9 -23  106.52    7.44
  -2  -9 -22   25.60    4.87
  -2  -9 -21   30.05    5.25
  -2  -9 -20  426.71   19.15
   2  -9  20  426.55   15.93
  -2  -9 -19   80.87    7.23
   2  -9  19   69.06    4.04
   2  -9  18   97.75    5.02
  -2  -9 -18   98.03    8.03
  -2  -9 -17  442.21   20.41
   2  -9  17  455.68   16.97
  -2  -9 -16  328.27   16.42
   2  -9  16  329.32   12.88
  -2  -9 -15  122.57    9.80
   2  -9  15  143.22    6.57
  -2  -9 -14  143.60   10.06
   2  -9  14  143.94    6.70
  -2  -9 -13  149.72    8.03
  -2  -9 -13  159.95   10.42
   2  -9  13  154.26    7.09
  -2  -9 -12   27.22    3.56
  -2  -9 -12   25.70    5.52
   2  -9  12   29.24    2.87
  -2  -9 -11   97.63    6.42
   2  -9  11  103.37    5.41
  -2  -9 -11  116.81    8.49
  -2  -9 -10  437.59   18.63
  -2  -9 -10  495.07   20.72
   2  -9  10  459.21   17.36
  -2  -9  -9  155.52    8.39
  -2  -9  -9  161.98   10.06
   2  -9   9  151.93    7.18
  -2  -9  -8  243.15   11.55
   2  -9   8  243.33   10.20
  -2  -9  -7   29.30    3.68
   2  -9   7   28.95    2.92
  -2  -9  -6  189.51    9.56
   2  -9   6  182.09    8.23
  -2  -9  -5  161.82    8.58
   2  -9   5  158.98    6.46
   2  -9   5  151.61    7.33
   2  -9   4  125.00    6.93
  -2  -9  -4  137.45    8.03
   2  -9   4  154.26    6.10
   2  -9   4  148.49    6.96
   2  -9   3 1048.90   39.07
   2  -9   3 1111.13   37.69
   2  -9   3 1100.27   38.68
   2  -9   2  406.86   16.58
   2  -9   2  419.92   15.16
   2  -9   2  420.98   16.16
   2  -9   1    2.23    2.21
   2  -9   1    1.24    1.96
   2  -9   1    2.83    1.32
   2  -9   0   66.77    4.81
   2  -9   0   71.18    3.66
   2  -9   0   70.00    4.60
   2  -9  -1    3.36    2.33
   2  -9  -1    1.01    2.20
   2  -9  -1    2.74    1.41
   2  -9  -2  440.78   17.29
   2  -9  -2  419.99   15.45
   2  -9  -2  416.73   16.51
   2  -9  -3 1119.35   40.35
   2  -9  -3 1116.54   38.48
   2  -9  -3 1102.26   39.62
   2  -9  -4  116.17    6.93
   2  -9  -4  127.81    5.60
   2  -9  -4  116.82    6.54
   2  -9  -5  155.75    8.14
   2  -9  -5  152.71    6.52
   2  -9  -5  137.57    7.59
   2  -9  -6  164.59    8.48
   2  -9  -6  145.98    6.57
   2  -9  -7   31.37    3.94
   2  -9  -7   31.06    2.65
   2  -9  -8  279.22   12.69
   2  -9  -9  170.90    8.67
   2  -9  -9  144.68    7.93
   2  -9  -9  146.12    8.02
   2  -9 -10  452.74   18.40
   2  -9 -10  427.00   17.96
   2  -9 -10  444.83   17.88
   2  -9 -11  102.48    7.04
   2  -9 -11  124.49    7.06
   2  -9 -11  118.26    7.13
   2  -9 -12   40.96    4.88
   2  -9 -12   38.47    4.12
   2  -9 -12   41.16    4.70
   2  -9 -13  157.25    8.37
   2  -9 -13  141.19    8.18
   2  -9 -14  191.03    9.70
   2  -9 -15  134.80    7.79
   2  -9 -16  262.38   12.96
   2  -9 -16  309.21   13.29
   2  -9 -17  453.81   19.09
   2  -9 -17  464.23   18.96
   2  -9 -18   75.01    6.22
   2  -9 -18   83.98    5.99
   2  -9 -19   72.34    6.17
   2  -9 -19   81.30    6.01
   2  -9 -20  445.26   18.06
   2  -9 -20  409.86   17.63
   2  -9 -21   30.40    4.85
   2  -9 -21   29.20    3.96
   2  -9 -22   34.48    4.41
   2  -9 -22   31.77    4.35
   2  -9 -23  103.72    7.02
   2  -9 -23  112.09    6.96
   2  -9 -24   77.12    5.70
   2  -9 -24   65.20    5.39
   2  -9 -25   24.63    4.27
   2  -9 -25   27.79    4.07
   2  -9 -26  121.01    6.86
   2  -9 -26  104.12    6.66
   2  -9 -27   46.59    4.33
   2  -9 -27   39.68    4.23
   2  -9 -28   26.23    3.62
   2  -9 -28   25.55    3.62
   2  -9 -29   11.55    2.84
   2  -9 -29   14.90    3.12
   2  -9 -30  124.41    6.29
   2  -9 -30  123.92    6.49
   2  -9 -31   15.17    2.32
   2  -9 -31   12.80    2.72
   2  -9 -32    1.07    1.55
   2   9  32    1.45    2.52
   2  -9 -32    1.64    2.12
   2  -9 -33   35.88    2.51
   2   9  33   41.80    3.36
   2  -9 -33   39.63    3.02
   2  -9 -34   35.24    2.15
   2   9  34   37.42    2.81
   2  -9 -34   38.14    2.66
   2   9  35   31.88    2.12
   2  -9 -35   32.55    2.18
   2  -9 -36   75.99    3.33
  -2  10  32   54.46    3.02
  -2  10  31    6.49    1.75
  -2  10  30   33.34    2.88
  -2  10  29   48.19    3.62
  -2 -10 -28   10.08    2.04
  -2  10  28   15.64    2.75
  -2 -10 -27   18.27    2.60
  -2  10  27   24.86    3.23
  -2 -10 -26   52.94    4.22
  -2  10  26   57.32    4.44
  -2 -10 -25   16.03    3.42
  -2  10  25   26.50    3.49
  -2 -10 -24   92.61    6.34
  -2  10  24   94.97    5.98
  -2 -10 -23    1.69    3.48
  -2  10  23    1.25    2.95
  -2 -10 -22  276.42   13.31
  -2 -10 -21  118.11    8.32
  -2 -10 -20   51.81    6.33
   2 -10  19  320.26   12.74
  -2 -10 -19  365.69   16.25
   2 -10  18  237.92    9.76
  -2 -10 -18  232.43   13.07
  -2 -10 -17   33.25    5.70
   2 -10  17   37.44    3.10
   2 -10  16   46.50    3.48
  -2 -10 -16   51.20    6.69
  -2 -10 -15  219.24    9.95
   2 -10  15  211.65    9.21
  -2 -10 -15  213.93   12.70
  -2 -10 -14   18.88    3.04
   2 -10  14   16.57    2.57
  -2 -10 -14   12.53    5.65
  -2 -10 -13  104.65    6.59
   2 -10  13  110.42    5.86
  -2 -10 -13  132.76    9.33
  -2 -10 -12  113.29    6.83
   2 -10  12  113.02    6.01
  -2 -10 -12  115.33    9.31
  -2 -10 -11  419.52   17.69
   2 -10  11  430.53   16.68
  -2 -10 -11  455.06   20.09
  -2 -10 -10   79.24    5.87
   2 -10  10   79.50    4.99
  -2 -10 -10   78.98    7.85
  -2 -10  -9   70.96    5.61
   2 -10   9   68.78    4.68
  -2 -10  -9   77.31    7.66
  -2 -10  -8  324.00   14.58
   2 -10   8  329.71   13.39
  -2 -10  -8  333.73   16.35
  -2 -10  -7    9.78    3.58
   2 -10   7   10.50    2.81
  -2 -10  -7   15.60    5.30
  -2 -10  -6  371.15   16.04
   2 -10   6  365.96   14.74
  -2 -10  -5  179.31    9.64
   2 -10   5  176.70    8.37
   2 -10   5  185.78    8.61
  -2 -10  -4  110.61    7.19
   2 -10   4  105.43    6.01
   2 -10   4  114.11    6.17
   2 -10   3   72.12    4.82
  -2 -10  -3   73.26    6.06
   2 -10   3   70.89    3.66
   2 -10   3   71.36    4.99
  -2 -10  -2  332.90   14.88
   2 -10   2  323.85   13.74
   2 -10   2  323.16   12.17
   2 -10   2  333.58   13.55
   2 -10   1   14.61    3.15
   2 -10   1   15.74    2.79
  -2 -10  -1   19.37    3.77
   2 -10   1   17.30    1.90
   2 -10   0   62.28    4.84
   2 -10   0   67.68    3.62
   2 -10   0   65.83    4.89
   2 -10  -1   17.21    3.47
   2 -10  -1   16.78    3.19
   2 -10  -1   18.84    2.06
   2 -10  -2  347.51   14.01
   2 -10  -2  302.00   12.02
   2 -10  -2  329.08   13.59
   2 -10  -3   69.53    5.33
   2 -10  -3   71.87    5.35
   2 -10  -4  113.91    7.00
   2 -10  -4  116.49    6.95
   2 -10  -5  185.76    9.59
   2 -10  -5  183.85    9.24
   2 -10  -6  382.48   15.86
   2 -10  -6  357.44   15.46
   2 -10  -7   12.58    3.68
   2 -10  -8  333.22   14.83
   2 -10  -9   70.28    5.95
   2 -10  -9   78.65    5.24
   2 -10 -10   79.25    6.11
   2 -10 -10   69.10    5.12
   2 -10 -11  448.79   18.28
   2 -10 -11  436.00   17.59
   2 -10 -11  407.39   17.76
   2 -10 -12  106.03    7.47
   2 -10 -12  118.30    6.81
   2 -10 -13   86.26    6.83
   2 -10 -13  124.13    6.87
   2 -10 -14   12.01    2.96
   2 -10 -15  223.71   10.61
   2 -10 -16   57.18    4.86
   2 -10 -17   41.87    5.19
   2 -10 -17   33.98    4.09
   2 -10 -18  263.62   12.26
   2 -10 -18  249.76   11.66
   2 -10 -19  345.56   16.05
   2 -10 -19  401.13   15.86
   2 -10 -20   49.55    5.20
   2 -10 -20   47.69    4.62
   2 -10 -21  127.44    7.76
   2 -10 -21  113.62    6.88
   2 -10 -22  261.66   12.05
   2 -10 -22  262.28   11.71
   2 -10 -23    1.09    3.33
   2 -10 -23    1.30    2.60
   2 -10 -24   79.59    5.83
   2 -10 -24   93.75    5.77
   2 -10 -25   18.04    3.45
   2 -10 -25   13.97    3.04
   2 -10 -26   48.82    4.24
   2 -10 -26   52.74    4.18
   2 -10 -27   25.79    3.26
   2 -10 -27   26.32    3.13
   2 -10 -28   14.25    2.64
  -2 -10  28   13.07    2.00
   2 -10 -28   13.01    2.62
  -2 -10  29   29.33    2.32
   2 -10 -29   47.18    3.32
   2 -10 -29   41.70    3.21
   2 -10 -30   30.53    2.72
   2 -10 -30   35.67    2.77
   2 -10 -31    6.10    1.64
   2  10  31    8.23    2.47
   2 -10 -31    6.77    1.68
   2  10  32   54.33    3.33
   2 -10 -32   54.18    2.78
   2 -10 -32   47.58    2.87
   2  10  33    0.79    1.23
   2 -10 -33    0.86    0.57
   2 -10 -33   -0.20    0.84
  -2 -11 -28    2.36    1.03
  -2  11  28    2.48    1.29
  -2 -11 -27    4.67    1.57
  -2  11  27    5.12    1.63
  -2 -11 -26    5.53    1.96
  -2  11  26    4.11    1.82
  -2 -11 -25   29.70    3.26
  -2  11  25   33.69    2.94
  -2  11  24   32.98    3.05
  -2 -11 -24   34.13    3.72
  -2 -11 -23  303.29   13.41
  -2  11  23  322.04   12.67
  -2 -11 -22   21.60    4.01
  -2  11  22   18.70    2.83
  -2 -11 -21   30.44    4.59
  -2  11  21   30.64    3.42
  -2 -11 -20   24.71    4.80
  -2  11  20   21.55    3.12
  -2 -11 -19  155.35    9.45
  -2 -11 -18   17.90    4.88
  -2 -11 -17   19.92    5.28
   2 -11  17   17.44    2.35
   2 -11  16  148.86    6.99
  -2 -11 -16  164.47   10.28
  -2 -11 -15  290.00   12.12
   2 -11  15  280.06   11.59
  -2 -11 -15  298.23   15.02
  -2 -11 -14    8.80    2.56
   2 -11  14    9.21    2.37
  -2 -11 -14    9.05    5.34
  -2 -11 -13  188.34    8.79
   2 -11  13  171.23    8.08
  -2 -11 -13  156.08   10.99
  -2 -11 -12  130.71    7.24
  -2 -11 -12  137.50    9.90
   2 -11  12  125.06    6.53
  -2 -11 -11  109.88    6.73
   2 -11  11  102.40    5.79
  -2 -11 -11   94.94    8.57
  -2 -11 -10   45.68    4.72
  -2 -11 -10   49.68    6.89
   2 -11  10   46.98    4.01
  -2 -11  -9  313.57   13.56
   2 -11   9  291.68   12.44
  -2 -11  -9  282.88   15.47
  -2 -11  -8   81.67    6.05
   2 -11   8   79.07    5.32
  -2 -11  -8   90.76    8.48
  -2 -11  -7   32.59    4.54
   2 -11   7   31.23    3.72
  -2 -11  -7   29.38    6.21
  -2 -11  -6  179.04    9.80
   2 -11   6  174.26    8.58
  -2 -11  -6  173.77   11.38
   2 -11   5  276.30   12.15
  -2 -11  -5  310.01   13.85
   2 -11   5  294.89   12.67
  -2 -11  -5  346.24   15.92
  -2 -11  -4   73.49    6.27
   2 -11   4   69.74    4.62
   2 -11   4   72.85    5.20
  -2 -11  -3  209.99   10.66
   2 -11   3  197.40    9.28
   2 -11   3  196.54    9.61
   2 -11   2  294.73   12.68
  -2 -11  -2  300.95   13.94
   2 -11   2  296.49   12.88
   2 -11   1  178.55    8.67
  -2 -11  -1  169.71    9.81
   2 -11   1  171.79    8.84
   2 -11   0    0.30    2.55
  -2 -11   0    2.88    4.01
   2 -11   0    0.28    3.24
  -2 -11   1  155.70    9.16
   2 -11  -1  158.59    8.10
   2 -11  -1  137.80    8.03
   2 -11  -2  299.67   13.11
  -2 -11   2  305.71   14.12
   2 -11  -2  288.36   13.14
   2 -11  -3  196.39    9.62
  -2 -11   3  194.02   10.62
   2 -11  -3  187.85    9.77
   2 -11  -4   83.10    5.83
  -2 -11   4   75.91    6.77
   2 -11  -4   67.56    5.89
   2 -11  -5  358.85   15.11
   2 -11  -5  339.55   14.97
   2 -11  -6  191.29    9.50
   2 -11  -6  162.60    9.43
   2 -11  -7   48.26    4.77
   2 -11  -7   34.56    5.11
   2 -11  -8   76.08    5.96
   2 -11  -8   68.72    6.26
   2 -11  -9  273.49   12.71
   2 -11 -10   54.12    5.23
   2 -11 -11  110.81    7.05
   2 -11 -11  102.10    5.95
   2 -11 -12  141.50    8.43
   2 -11 -12  142.18    7.37
   2 -11 -13  188.13    9.40
   2 -11 -13  156.81    8.17
   2 -11 -14    7.52    2.48
   2 -11 -15  280.77   12.10
   2 -11 -16  161.86    8.01
   2 -11 -17   12.96    2.78
   2 -11 -18   19.87    4.32
   2 -11 -18   13.22    2.75
   2 -11 -19  179.40    9.41
   2 -11 -19  174.40    8.39
   2 -11 -20   19.78    3.93
   2 -11 -20   17.12    2.68
   2 -11 -21   38.80    4.21
   2 -11 -21   32.98    3.40
   2 -11 -22   26.61    3.01
   2 -11 -22   14.80    3.45
  -2 -11  23  336.37   13.17
   2 -11 -23  316.34   13.00
   2 -11 -23  292.02   12.46
  -2 -11  24   26.70    3.17
   2 -11 -24   33.83    3.58
   2 -11 -24   31.70    2.88
  -2 -11  25   26.07    2.70
   2 -11 -25   28.45    3.11
   2 -11 -25   22.29    2.54
   2 -11 -26    5.71    2.28
  -2 -11  26    4.21    1.64
   2 -11 -26    6.07    1.87
   2 -11 -27    4.15    1.93
  -2 -11  27    5.54    1.30
   2 -11 -27    3.71    1.52
   2 -11 -28    1.91    1.58
   2 -11 -28    2.66    1.21
   2  11  29   26.98    2.78
   2 -11 -29   26.93    2.14
   2 -11 -29   20.37    1.79
   2 -11 -30   22.83    1.63
   2  11  30   19.52    2.13
   2 -11 -30   14.01    1.33
   2  11  31  115.60    4.91
  -2 -12 -26    5.75    1.09
  -2 -12 -25   11.66    1.69
  -2 -12 -24   22.73    2.43
  -2 -12 -23   14.22    2.47
  -2 -12 -22    1.55    2.59
  -2  12  21   28.83    2.15
  -2 -12 -21   36.09    4.01
  -2  12  20   34.81    2.51
  -2 -12 -20   48.70    4.66
  -2  12  19   76.11    4.02
  -2 -12 -19   86.69    6.19
  -2 -12 -18    9.69    4.16
  -2  12  18    7.20    1.63
  -2 -12 -17    1.12    4.07
  -2  12  17    0.37    1.42
  -2 -12 -16    9.02    4.32
  -2  12  16    9.99    1.82
  -2 -12 -15    6.04    2.11
   2 -12  15    8.21    1.97
  -2 -12 -15   10.79    4.86
  -2 -12 -14   17.08    2.70
   2 -12  14   21.68    2.59
  -2 -12 -14   24.75    5.71
  -2 -12 -13   39.08    3.63
   2 -12  13   37.75    3.32
  -2 -12 -13   38.30    6.18
  -2 -12 -12  151.50    7.62
   2 -12  12  151.58    7.30
  -2 -12 -12  146.88   10.29
  -2 -12 -11   21.78    3.43
   2 -12  11   22.82    3.10
  -2 -12 -11   29.11    6.25
  -2 -12 -10   14.65    3.35
   2 -12  10   12.60    2.90
  -2 -12 -10    8.41    5.79
  -2 -12  -9    3.20    3.05
   2 -12   9    1.62    2.78
  -2 -12  -9    1.93    5.57
  -2 -12  -8   78.87    6.01
   2 -12   8   86.26    5.44
  -2 -12  -8   81.45    8.33
  -2 -12  -7   25.90    4.25
   2 -12   7   25.99    3.85
  -2 -12  -7   25.95    6.18
  -2 -12  -6  131.29    8.00
   2 -12   6  133.30    7.27
  -2 -12  -6  142.05   10.00
   2 -12   5   64.00    4.12
  -2 -12  -5   76.79    6.02
   2 -12   5   75.22    5.36
  -2 -12  -5   73.08    7.89
   2 -12   4  126.00    6.41
  -2 -12  -4  129.65    8.18
   2 -12   4  136.36    7.43
  -2 -12  -4  137.51    9.94
   2 -12   3  118.20    6.31
  -2 -12  -3  121.13    7.92
   2 -12   3  120.93    7.19
  -2 -12  -3  131.59    9.78
   2 -12   2   86.37    5.27
  -2 -12  -2   89.15    6.90
   2 -12   2   88.40    6.13
  -2 -12  -2   95.31    8.71
  -2 -12  -1   77.77    6.60
   2 -12   1   77.99    5.04
   2 -12   1   81.60    6.11
   2 -12   0  100.10    5.92
  -2 -12   0   96.05    7.05
   2 -12   0   92.99    6.63
   2 -12  -1   77.14    5.26
  -2 -12   1   75.31    6.90
   2 -12  -1   81.18    6.20
   2 -12  -2   93.38    5.89
  -2 -12   2   87.28    7.03
   2 -12  -2   89.25    6.51
   2 -12  -3  128.36    7.05
  -2 -12   3  112.14    8.31
   2 -12  -3  114.08    7.53
   2 -12  -4  140.26    7.56
  -2 -12   4  140.54    8.75
   2 -12  -4  122.45    7.98
   2 -12  -5   77.50    5.64
  -2 -12   5   70.24    6.71
   2 -12  -6  135.84    7.62
  -2 -12   6  127.99    8.69
   2 -12  -7   30.30    4.15
  -2 -12   7   33.05    5.34
   2 -12  -8   90.66    6.03
  -2 -12   8   74.10    6.94
   2 -12  -9    2.18    3.35
  -2 -12   9    0.80    4.42
   2 -12 -10   13.99    3.61
   2 -12 -11   22.88    3.89
   2 -12 -12  168.39    8.78
   2 -12 -13   44.20    4.77
   2 -12 -14   16.73    4.00
  -2 -12  14   16.06    4.42
   2 -12 -14   22.45    2.37
  -2 -12  15    4.65    3.76
   2 -12 -15    7.68    1.84
  -2 -12  16   12.65    3.61
   2 -12 -16   11.44    2.00
  -2 -12  17    0.71    3.11
   2 -12 -17    2.32    1.66
   2 -12 -18    5.99    3.23
  -2 -12  18    5.11    3.16
   2 -12 -18    8.08    1.86
  -2 -12  19   92.67    5.86
   2 -12 -19  101.58    5.75
   2 -12 -19   73.18    4.32
  -2 -12  20   42.54    3.94
   2 -12 -20   42.96    3.92
   2 -12 -20   39.17    2.91
  -2 -12  21   43.26    3.70
   2 -12 -21   47.90    3.83
   2 -12 -21   33.98    2.69
   2 -12 -22    1.80    2.24
  -2 -12  22    4.12    2.13
   2 -12 -22    1.76    1.33
   2 -12 -23   19.23    2.64
   2 -12 -23   12.97    1.61
  -2 -12  23   13.31    2.06
  -2 -12  24   23.14    2.12
   2 -12 -24   26.81    2.65
   2 -12 -24   18.99    1.71
  -2 -12  25    8.66    1.17
   2 -12 -25   14.62    2.04
   2 -12 -25    8.13    1.10
   2 -12 -26    5.99    1.52
   2 -12 -27    6.07    1.20
   2  12  28    8.29    1.33
   2 -12 -28    9.20    1.03
  -2 -13 -23   10.16    1.27
  -2 -13 -22   49.21    2.98
  -2 -13 -21   26.27    2.64
  -2 -13 -20   50.57    3.67
  -2 -13 -19   92.14    5.45
  -2 -13 -18  170.45    8.33
  -2 -13 -17   23.37    3.68
  -2 -13 -16   30.31    4.29
  -2 -13 -15   58.39    3.42
  -2 -13 -15   65.03    5.65
  -2 -13 -14   31.73    2.71
  -2 -13 -14   45.85    5.31
  -2 -13 -13    3.35    1.78
  -2 -13 -13    4.35    4.26
  -2 -13 -12  143.69    6.92
  -2 -13 -12  149.21    9.03
  -2 -13 -11   37.48    3.39
   2 -13  11   33.48    3.08
  -2 -13 -11   32.11    5.73
  -2 -13 -10  162.15    7.52
  -2 -13 -10  154.77    9.52
   2 -13  10  144.39    7.09
  -2 -13  -9   55.35    4.35
  -2 -13  -9   50.99    6.72
   2 -13   9   55.14    4.10
  -2 -13  -8   21.23    3.37
   2 -13   8   17.40    2.97
  -2 -13  -8   16.90    5.21
  -2 -13  -7   71.79    5.06
  -2 -13  -7   62.31    7.33
   2 -13   7   65.25    4.70
  -2 -13  -6   50.32    4.65
   2 -13   6   46.30    4.23
  -2 -13  -6   48.47    6.49
  -2 -13  -5   87.52    5.97
  -2 -13  -5   75.09    7.32
   2 -13   5   79.00    5.40
  -2 -13  -4   31.92    4.20
  -2 -13  -4   22.08    6.24
   2 -13   4   29.39    3.75
   2 -13   3   87.29    4.73
  -2 -13  -3  106.73    6.57
  -2 -13  -3   93.27    8.31
   2 -13   3   97.74    6.12
   2 -13   2   57.45    3.79
  -2 -13  -2   64.15    5.61
  -2 -13  -2   69.08    7.24
   2 -13   1    0.35    1.70
  -2 -13  -1    0.85    3.78
  -2 -13  -1    1.36    5.32
   2 -13   0  157.47    7.29
  -2 -13   0  144.12    8.67
  -2 -13   0  154.45    9.84
   2 -13  -1    0.66    2.06
  -2 -13   1    1.03    3.92
  -2 -13   1   -1.24    5.01
   2 -13  -2   50.93    3.95
  -2 -13   2   42.69    5.28
   2 -13  -3  105.76    5.95
  -2 -13   3  109.89    7.32
   2 -13  -4   30.08    3.27
  -2 -13   4   31.18    5.15
  -2 -13   5   97.22    7.16
   2 -13  -5   98.27    5.81
  -2 -13   6   64.45    5.73
   2 -13  -6   65.12    4.68
   2 -13  -7   74.20    5.01
  -2 -13   7   65.22    6.01
   2 -13  -8   22.57    3.15
  -2 -13   8   22.81    4.50
   2 -13  -9   55.11    4.27
  -2 -13   9   47.38    5.27
   2 -13 -10  173.45    8.45
   2 -13 -11   39.48    4.11
   2 -13 -12  168.02    8.13
   2 -13 -13    4.82    2.80
  -2 -13  13    6.21    3.44
  -2 -13  14   36.98    4.22
   2 -13 -14   38.82    3.81
  -2 -13  15   53.11    4.46
   2 -13 -15   55.88    4.16
  -2 -13  16   33.91    3.64
  -2 -13  17   20.09    3.10
  -2 -13  18  167.48    7.71
   2 -13 -19  105.81    5.45
  -2 -13  19  109.30    5.52
   2 -13 -20   61.63    3.67
  -2 -13  20   54.50    3.46
   2 -13 -21   26.36    2.41
  -2 -13  21   22.25    2.04
   2 -13 -22   67.02    3.29
  -2 -13  22   45.11    2.54
  -2 -13  22   45.38    2.87
   2 -13 -23   13.09    1.56
   2  13  24   26.89    1.95
   2 -13 -24   34.06    1.97
   2 -13 -25   28.06    1.61
  -2 -14 -19   65.86    3.23
  -2 -14 -18   52.36    3.07
  -2 -14 -17   37.99    2.91
  -2 -14 -16   15.01    2.38
  -2 -14 -15   69.67    4.44
  -2 -14 -14   31.50    3.46
  -2 -14 -13   34.29    2.27
  -2 -14 -13   44.80    4.15
  -2 -14 -12  133.71    5.76
  -2 -14 -12  133.01    7.32
  -2 -14 -11   17.02    3.87
  -2 -14 -10    0.04    1.60
  -2 -14 -10    0.50    3.53
  -2 -14  -9    1.50    1.77
  -2 -14  -9   -0.60    3.57
  -2 -14  -8   32.03    2.94
  -2 -14  -8   35.17    4.82
  -2 -14  -7   39.22    3.33
  -2 -14  -7   34.96    4.94
  -2 -14  -6    5.91    2.30
  -2 -14  -6    2.28    3.87
  -2 -14  -5    4.10    2.42
  -2 -14  -5    3.07    4.16
  -2 -14  -4   15.07    2.82
  -2 -14  -4    9.94    4.19
  -2 -14  -3   99.57    5.76
  -2 -14  -3   97.74    7.20
  -2 -14  -2   45.94    4.10
  -2 -14  -2   34.61    5.13
   2 -14   1    5.48    1.23
  -2 -14  -1    6.96    2.92
  -2 -14  -1    4.77    4.17
   2 -14   0    4.88    1.34
  -2 -14   0    7.08    2.98
   2 -14  -1    5.47    1.56
  -2 -14   1    5.35    3.17
  -2 -14   2   46.87    4.27
   2 -14  -2   39.41    2.87
  -2 -14   3  101.38    6.04
   2 -14  -3   90.42    4.71
  -2 -14   4   16.42    3.38
   2 -14  -4   15.33    2.10
   2 -14  -5    4.48    1.87
  -2 -14   5    4.79    3.07
  -2 -14   5    3.00    3.71
   2 -14  -6    5.29    1.95
  -2 -14   6    5.56    3.17
  -2 -14   6    8.05    3.78
  -2 -14   7   36.11    4.05
   2 -14  -7   38.25    3.05
  -2 -14   7   42.14    4.72
   2 -14  -8   35.70    2.93
  -2 -14   8   33.01    3.75
  -2 -14   8   35.56    4.40
   2 -14  -9    1.76    1.97
  -2 -14   9    0.54    2.92
   2 -14 -10    1.07    1.86
  -2 -14  10    1.43    3.02
   2 -14 -11   15.82    2.38
  -2 -14  11   16.77    3.13
  -2 -14  12  143.87    6.92
   2 -14 -12  136.71    6.28
  -2 -14  12  135.70    7.05
  -2 -14  13   38.66    3.28
   2 -14 -13   39.53    2.95
  -2 -14  13   38.86    3.55
   2 -14 -14   37.02    2.78
  -2 -14  14   36.31    3.01
  -2 -14  14   35.20    3.23
  -2 -14  15   63.76    3.81
   2 -14 -15   72.16    3.76
  -2 -14  15   63.25    4.03
   2 -14 -16   15.63    1.90
  -2 -14  16   17.70    1.95
  -2 -14  16   17.23    2.12
  -2 -14  17   37.68    2.40
  -2 -14  17   33.02    2.47
  -2 -14  18   41.00    2.27
   2 -14 -20    1.46    0.71
  -2 -15 -14    6.79    0.95
  -2 -15 -13   52.71    2.83
  -2 -15 -12   40.39    2.61
  -2 -15 -11    2.37    1.44
  -2 -15 -10   35.25    2.78
  -2 -15  -9    2.21    0.82
  -2 -15  -9    3.10    1.82
  -2 -15  -8   65.55    3.18
  -2 -15  -8   68.01    4.20
  -2 -15  -7    8.01    1.27
  -2 -15  -7    5.98    2.33
  -2 -15  -6   46.36    2.80
  -2 -15  -6   48.21    3.80
  -2 -15  -5   30.20    2.24
  -2 -15  -5   22.41    3.10
  -2 -15  -4   11.80    1.81
  -2 -15  -4   12.24    2.84
  -2 -15  -3   91.75    4.54
  -2 -15  -2   63.87    3.64
  -2 -15  -1   29.00    2.50
  -2 -15   0    4.14    1.75
  -2 -15   1   30.26    2.67
  -2 -15   2   70.01    3.96
  -2 -15   2   67.69    4.63
  -2 -15   3  100.75    4.82
  -2 -15   3   81.06    5.16
  -2 -15   4   11.59    2.06
  -2 -15   4   12.95    2.57
  -2 -15   5   26.10    2.39
   2 -15  -5   15.84    1.23
  -2 -15   5   25.28    2.87
  -2 -15   6   53.62    3.07
  -2 -15   6   50.79    3.45
   2 -15  -7    4.50    0.88
  -2 -15   7    7.04    1.78
  -2 -15   7    6.05    2.02
   2 -15  -8   51.14    2.63
  -2 -15   8   74.24    3.88
   2 -15  -9    1.69    0.74
  -2 -15   9    4.09    1.60
  -2 -15  10   41.52    2.47
   2 -15 -10   31.16    1.83
  -2 -15  10   36.28    2.58
   2 -15 -11    1.28    0.67
  -2 -15  11    2.17    1.07
  -2 -15  11    1.28    1.03
   2 -15 -12   25.78    1.55
  -2 -15  12   33.77    1.95
  -2 -15  13   48.37    2.35
   3   0   4  192.63    8.62
   3   0   5   19.87    2.42
   3   0   5   16.74    2.45
   3   0   6   95.43    5.15
   3   0   6   83.66    5.10
   3   0   7    4.65    2.01
   3   0  -7    3.83    1.56
   3   0   7    6.48    2.09
   3   0  -8  344.57   13.80
   3   0   8  348.89   14.16
   3   0   8  366.26   14.47
   3   0  -9  436.49   17.23
   3   0   9  452.68   17.63
   3   0   9  474.85   17.97
   3   0 -10  236.51   10.54
   3   0  10  237.12   10.88
   3   0 -10  258.48   10.71
   3   0  10  285.39   11.54
   3   0 -11  323.07   13.86
   3   0  11  317.18   14.25
   3   0 -11  367.24   14.11
   3   0 -12  280.70   12.05
   3   0  12  300.30   12.89
   3   0 -12  294.08   12.21
   3   0 -13  663.75   24.44
   3   0  13  670.31   25.16
   3   0 -13  634.01   24.42
   3   0 -14  407.26   15.55
   3   0  14  374.35   16.06
   3   0 -14  365.42   15.34
   3   0 -15  127.13    6.54
   3   0  15  137.89    7.02
   3   0  15   87.88    6.51
   3   0 -15   94.73    6.01
   3   0  16  425.73   18.33
   3   0  16  488.55   19.23
   3   0 -16  473.73   18.34
   3   0  17    2.42    2.87
   3   0  17    1.98    3.39
   3   0 -17    1.27    2.27
   3   0  18   17.28    3.80
   3   0 -18   14.53    3.01
   3   0  18   19.34    3.99
   3   0 -18   20.59    3.21
   3   0  19    6.74    3.42
   3   0 -19    7.37    3.02
   3   0 -19    3.55    2.74
   3   0 -20  319.05   14.95
   3   0  20  352.22   15.42
   3   0  21  197.79   10.09
   3   0 -21  202.37    9.92
   3   0 -21  189.58    9.88
   3   0  22   25.75    4.31
   3   0 -22   23.25    3.82
   3   0 -22   28.81    4.22
   3   0  23    2.28    3.68
   3   0 -23    2.52    3.32
   3   0 -23    5.17    3.29
   3   0 -24   47.73    4.90
   3   0  24   51.16    5.43
   3   0 -24   34.74    4.79
   3   0 -25  478.06   18.67
   3   0  25  466.34   18.83
   3   0  25  393.99   19.25
   3   0 -25  468.47   19.16
   3   0  26   16.07    4.14
   3   0 -26   15.02    3.93
   3   0  26   14.76    4.79
   3   0 -26   17.03    4.19
   3   0  27   17.87    4.05
   3   0 -27   15.35    3.95
   3   0  27   13.99    5.19
   3   0 -27   16.56    4.17
   3   0  28   28.94    4.49
   3   0  28   28.28    5.69
   3   0 -28   30.23    4.91
   3   0  29   92.77    6.34
   3   0  29   72.65    7.52
   3   0  30    1.53    3.42
   3   0  30    0.94    5.02
   3   0  31  255.25   11.32
   3   0  31  248.54   12.62
   3   0  32   -0.24    2.84
   3   0  32   -1.10    4.78
   3   0  33  103.40    5.76
   3   0  33   96.07    7.10
   3   0  34    5.74    2.38
   3   0  34   -0.22    3.86
   3   0  35   53.83    3.47
   3   0  35   49.26    5.20
   3   0  36  236.13   10.70
   3   0  36  239.41    9.25
   3   0  37    2.83    2.77
   3   0  38   -0.67    2.21
   3   0  39   31.55    2.76
   3   0  40   19.90    1.90
   3   0  41   17.95    1.31
   3  -1  40  115.36    4.94
   3  -1  39   64.89    3.75
   3  -1  38   14.25    2.56
   3  -1  37    5.62    2.63
   3  -1  36   28.88    3.79
   3  -1  36   36.05    2.26
   3  -1  35   73.20    5.44
   3  -1  35   73.70    3.90
   3  -1  34   50.80    5.41
   3  -1  34   68.40    3.95
   3  -1  33   34.85    3.24
   3  -1  33   28.28    4.70
   3  -1  32  118.98    6.15
   3  -1  32   89.27    7.31
  -3   1  32  106.86    5.59
   3  -1  31   30.67    3.65
   3  -1  31   23.10    5.39
  -3   1  31   31.88    3.17
   3  -1  30   49.52    4.47
   3  -1  30   31.33    5.81
  -3   1  30   44.15    3.83
   3  -1  29   56.16    4.96
   3  -1  29   43.67    6.30
  -3   1  29   52.35    4.31
   3  -1  28   40.53    4.59
   3  -1  28   32.96    5.73
  -3   1  28   31.63    3.52
   3  -1  27  337.35   14.19
   3  -1  27  302.92   15.19
   3  -1  26  434.02   17.32
   3  -1  26  387.40   18.11
   3  -1  25  208.93   10.30
   3  -1  25  201.21   11.11
   3   1 -25  190.98   10.54
   3  -1  24   31.12    4.57
   3   1 -24   33.50    4.82
   3  -1  24   32.03    5.04
   3   1 -23  186.74    9.64
   3  -1  23  185.84    9.65
   3   1 -23  189.95   10.02
   3  -1  23  181.10   10.41
   3   1 -22  390.91   16.48
   3  -1  22  392.11   16.56
   3   1 -22  406.87   16.90
   3  -1  22  380.23   17.37
   3   1 -21  185.56    9.51
   3  -1  21  184.79    9.60
   3   1 -21  183.83    9.85
   3  -1  21  195.26   10.32
   3  -1  20  245.34   11.40
   3   1 -20  269.56   11.42
   3   1 -20  224.03   11.32
   3  -1  20  216.60   11.82
   3   1 -19  469.91   19.31
   3  -1  19  465.57   19.40
   3   1 -19  517.43   19.79
   3  -1  19  498.50   20.35
   3   1 -18  523.52   20.10
   3  -1  18  545.84   20.27
   3   1 -18  488.66   20.05
   3  -1  18  458.48   20.33
   3  -1  17  555.13   22.42
   3   1 -17  605.78   22.69
   3  -1  16    3.51    2.85
   3   1 -16    3.90    2.45
   3  -1  15  167.29    8.67
   3   1 -15  178.62    8.69
   3   1 -14  188.00    8.97
   3  -1  14  200.07    9.36
   3   1 -14  187.54    9.12
   3   1 -13    4.77    2.21
   3   1 -12  577.62   21.83
   3   1 -11  276.57   11.86
   3  -1  11  292.30   12.56
   3   1 -10  433.50   16.55
   3  -1  10  413.34   16.69
   3  -1  10  426.77   17.17
   3   1  -9  158.49    7.49
   3  -1   9  151.95    7.70
   3  -1   9  169.45    8.13
   3   1  -8  289.86   11.60
   3  -1   8  290.39   11.81
   3  -1   8  262.81   11.95
   3   1  -7   87.13    4.90
   3  -1   7   85.33    5.13
   3  -1   7  100.69    5.63
  -3  -1  -7   89.66    9.42
   3  -1   6  534.62   20.78
   3   1  -6  531.53   20.58
  -3  -1  -6  494.76   27.11
   3  -1   5 1013.26   36.03
   3  -1   5 1003.79   36.39
  -3  -1  -5 1088.21   44.10
   3  -1   4  995.18   34.57
   3  -1   4  950.71   34.86
  -3   1   4  968.82   38.80
   3  -1   3  137.44    6.77
  -3   1   3  140.29    9.66
   3  -1   2  769.19   27.62
  -3   1   2  726.40   31.50
   3  -1   1  133.49    6.67
  -3   1   1  170.87   10.51
   3  -1   0  134.52    5.53
  -3   1   0   36.55    5.58
   3  -1  -1  144.98    7.01
  -3   1  -1  178.71   11.09
  -3   1  -2  791.11   33.75
  -3   1  -3  134.59   10.09
  -3   1  -4 1088.24   44.61
   3   1   5 1003.65   36.22
  -3   1  -5 1070.16   43.10
   3  -1  -6  460.24   18.58
   3   1   6  494.31   19.15
   3  -1  -7   79.31    4.55
   3   1   7   79.95    4.98
   3   1   7   90.49    5.10
   3  -1  -7   86.13    4.27
   3  -1  -8  274.19   10.95
   3   1   8  269.52   11.48
   3   1   8  256.40   11.26
   3  -1  -8  262.99   10.30
   3  -1  -9  139.17    6.98
   3   1   9  143.23    7.50
   3   1   9  162.10    7.71
   3  -1  -9  157.82    6.45
   3  -1 -10  450.94   16.95
   3   1  10  453.37   17.48
   3   1  10  437.11   17.41
   3  -1 -10  400.30   16.65
   3  -1 -10  450.76   15.94
   3  -1 -11  277.31   12.19
   3   1  11  280.73   12.70
   3   1  11  315.98   12.99
   3  -1 -11  297.82   12.18
   3  -1 -11  311.28   11.22
   3  -1 -12  589.19   22.29
   3   1  12  599.65   22.85
   3   1  12  608.82   22.89
   3  -1 -12  566.56   22.18
   3  -1 -12  603.38   20.97
   3   1  13    3.79    2.83
   3  -1 -13    5.37    2.04
   3  -1 -13    6.05    1.16
   3   1  13    6.36    2.61
   3  -1 -13    2.96    1.76
   3  -1 -14  187.73    8.76
   3   1  14  178.40    9.28
   3  -1 -14  175.19    8.58
   3  -1 -14  188.51    7.21
   3  -1 -15  174.71    8.84
   3   1  15  215.04    9.93
   3  -1 -15  203.92    9.08
   3  -1 -15  187.46    7.41
   3   1  16    5.50    3.17
   3   1  16    8.20    3.22
   3  -1 -16    7.60    2.24
   3   1  17  545.84   22.60
   3   1  17  600.98   23.22
   3  -1 -17  589.77   22.30
   3   1  18  506.56   19.93
   3   1  18  477.46   19.97
   3  -1 -18  478.14   19.27
   3   1  19  471.87   19.89
   3  -1 -19  450.54   19.33
   3   1  19  522.42   20.53
   3  -1 -19  530.63   19.84
   3  -1 -20  248.76   11.57
   3   1  20  253.49   12.11
   3   1  20  248.50   12.40
   3  -1 -20  254.43   11.69
   3  -1 -21  206.98   10.15
   3   1  21  205.50   10.59
   3   1  21  200.76   10.82
   3  -1 -21  206.12   10.21
   3   1  22  380.43   16.88
   3  -1 -22  389.41   16.56
   3   1  22  402.39   17.43
   3  -1 -22  403.26   16.83
   3  -1 -23  176.34    9.39
   3   1  23  192.92   10.09
   3   1  23  177.37   10.38
   3  -1 -23  183.87    9.80
   3  -1 -24   41.85    4.68
   3   1  24   37.33    5.15
   3   1  24   33.69    5.60
   3  -1 -24   37.88    4.61
   3  -1 -25  221.70   10.75
   3   1  25  219.94   11.13
   3  -1 -25  206.14   10.80
   3  -1 -26  451.86   18.35
   3   1  26  451.52   18.55
   3  -1 -26  421.32   18.48
   3  -1 -27  367.19   15.08
   3   1  27  341.60   15.11
   3  -1 -27  323.60   15.29
   3   1  28   33.98    4.80
   3  -1 -28   37.41    4.69
   3  -1 -28   35.57    4.94
   3  -1 -29   51.28    4.91
   3   1  29   51.13    5.37
   3  -1 -29   50.76    5.53
   3  -1 -30   54.19    4.91
   3   1  30   46.72    4.83
   3  -1 -30   37.80    5.34
   3   1  31   25.83    4.05
   3  -1 -31   16.27    4.16
   3   1  32  107.10    6.44
   3   1  33   31.48    3.71
   3   1  33   22.25    4.83
   3   1  34   60.37    4.27
   3   1  34   50.29    5.23
   3   1  35   73.62    4.33
   3   1  35   73.90    5.52
   3   1  36   41.77    2.88
   3   1  36   34.59    4.06
   3   1  37    5.45    1.34
   3   1  37    3.45    2.80
   3   1  38   17.30    2.73
   3   1  39   74.34    4.13
   3   1  40  127.96    5.47
   3   1  41    1.11    0.66
   3  -2  40   98.51    4.10
   3  -2  39   15.27    1.74
   3  -2  38   39.61    3.01
   3  -2  37   49.35    3.67
   3  -2  36   57.13    4.30
  -3   2  36   55.03    3.11
   3  -2  35   39.99    4.27
  -3   2  35   44.49    3.10
   3  -2  35   49.97    2.74
   3  -2  34  242.56   11.17
  -3   2  34  238.62   10.03
   3  -2  34  253.30    9.69
   3  -2  33    9.87    2.21
   3  -2  33   16.29    4.06
  -3   2  33   10.71    2.38
   3  -2  32   10.68    2.46
   3  -2  32    7.92    4.22
  -3   2  32    8.74    2.42
   3  -2  31  285.51   11.63
   3  -2  31  275.33   12.95
  -3   2  31  273.03   11.87
   3  -2  30    6.52    2.80
   3  -2  30    8.93    4.54
  -3   2  30    4.17    2.58
   3  -2  29   21.15    3.43
   3  -2  29   21.02    4.90
  -3   2  29   20.98    3.45
   3  -2  28   27.66    3.92
   3  -2  28   27.80    5.37
   3  -2  27  530.22   20.10
   3  -2  27  480.07   21.10
   3  -2  26   68.54    5.64
   3  -2  26   81.42    6.98
   3  -2  25    6.31    3.48
   3  -2  25   15.52    4.95
   3  -2  24   -0.08    3.29
   3  -2  24   -0.70    4.09
   3  -2  23    1.00    3.31
   3  -2  23    1.89    3.90
   3  -2  22  689.03   26.84
   3  -2  22  729.84   27.89
   3  -2  21    1.53    3.40
   3  -2  21    8.49    4.06
   3  -2  20  177.03    9.23
   3  -2  20  185.76   10.13
   3  -2  19   81.12    5.64
   3  -2  19   68.25    6.09
   3  -2  18  836.12   32.87
   3  -2  18  983.82   34.09
   3  -2  17  409.71   16.27
   3  -2  17  368.81   16.63
   3  -2  16   91.69    5.75
   3  -2  16   66.97    5.71
   3  -2  15  198.48    9.66
   3  -2  15  211.81   10.41
   3  -2  14  148.50    7.75
   3  -2  14  154.92    8.30
   3  -2  13  149.73    7.86
   3  -2  13  173.75    8.60
   3  -2  12  674.37   26.03
   3  -2  12  734.89   26.73
   3  -2  11   43.29    4.01
   3  -2  10  135.35    7.28
   3  -2   9   43.41    3.70
   3  -2   8  276.99   11.63
   3  -2   7  303.45   12.36
   3  -2   6  383.81   14.98
   3  -2   5   16.42    2.35
   3  -2   4 1008.22   34.94
   3  -2   4  955.44   35.32
  -3  -2  -4  992.94   43.46
   3  -2   3  282.33   11.52
   3  -2   3  297.14   12.10
  -3  -2  -3  287.16   18.02
  -3   2   3  284.66   15.98
   3  -2   2  134.36    6.26
  -3  -2  -2  151.33   12.07
  -3   2   2  126.53    9.83
   3  -2   2  134.92    6.75
  -3   2   1  134.21   10.61
   3  -2   1  155.91    7.19
   3  -2   0  243.34   10.40
  -3   2   0  251.98   14.77
  -3   2  -1  125.53   10.04
  -3   2  -2  131.59   10.50
  -3   2  -3  260.16   16.05
   3   2   5   18.72    2.49
   3  -2  -5   24.63    2.40
   3  -2  -6  332.84   13.67
   3   2   6  353.42   14.31
   3  -2  -6  378.02   13.58
   3  -2  -7  321.82   12.77
   3   2   7  326.25   13.38
   3   2   7  320.46   13.06
   3  -2  -7  324.33   12.36
   3  -2  -8  274.06   11.34
   3   2   8  285.25   11.92
   3   2   8  265.80   11.54
   3  -2  -8  281.91   10.81
   3   2   9   71.92    4.82
   3  -2  -9   72.24    4.28
   3   2   9   52.78    4.10
   3  -2  -9   63.23    3.57
   3   2  10  183.52    8.75
   3  -2 -10  175.61    8.07
   3   2  10  157.82    8.18
   3  -2 -10  178.26    7.23
   3  -2 -11   23.22    2.86
   3   2  11   26.87    3.48
   3   2  11   34.03    3.48
   3  -2 -11   31.79    2.25
   3   2  12  761.82   28.56
   3  -2 -12  766.85   27.95
   3   2  12  768.80   28.44
   3  -2 -12  724.81   27.71
   3  -2 -12  778.83   26.69
   3  -2 -13  144.81    7.52
   3   2  13  156.29    8.28
   3   2  13  163.87    8.28
   3  -2 -13  158.16    6.40
   3  -2 -13  153.95    7.47
   3  -2 -14  145.14    7.48
   3   2  14  135.13    8.14
   3   2  14  157.80    8.29
   3  -2 -14  154.52    6.24
   3  -2 -14  154.91    7.52
   3  -2 -15  209.13   10.12
   3   2  15  242.26   10.95
   3  -2 -15  226.51    8.71
   3  -2 -15  224.97   10.12
   3  -2 -16   72.24    5.15
   3   2  16   63.64    5.47
   3  -2 -16   83.02    3.79
   3  -2 -16   64.34    4.74
   3   2  17  364.56   15.80
   3  -2 -17  371.04   13.50
   3  -2 -17  355.13   15.05
   3   2  18  868.60   33.64
   3   2  18  921.64   34.04
   3  -2 -18  917.64   33.25
   3  -2 -19   83.37    5.75
   3   2  19   88.01    6.37
   3   2  19   72.24    6.27
   3  -2 -19   80.27    5.55
   3  -2 -20  222.59   10.39
   3   2  20  202.16   10.86
   3   2  20  209.30   10.91
   3  -2 -20  211.94   10.23
   3   2  21    3.29    3.90
   3  -2 -21    1.90    3.07
   3   2  21    4.85    4.00
   3  -2 -21    5.60    3.09
   3  -2 -22  688.18   26.12
   3   2  22  672.98   26.64
   3   2  22  667.66   26.92
   3  -2 -22  690.91   26.29
   3   2  23   -1.11    4.11
   3  -2 -23    3.01    3.27
   3   2  23   -0.31    3.95
   3  -2 -23    2.59    2.72
   3   2  24    1.94    4.50
   3  -2 -24    2.38    3.45
   3   2  24    2.98    3.86
   3  -2 -24    0.09    3.21
   3   2  25   10.69    4.59
   3  -2 -25   10.75    3.78
   3   2  25   17.08    4.87
   3  -2 -25   13.44    3.52
   3  -2 -26   80.30    6.08
   3   2  26   79.45    6.73
   3   2  26   81.93    7.16
   3  -2 -26   84.46    6.27
   3  -2 -27  516.09   20.91
   3   2  27  529.94   21.37
   3   2  27  505.97   21.77
   3  -2 -27  535.33   21.28
   3  -2 -28   39.04    4.59
   3   2  28   42.22    5.18
   3   2  28   32.96    5.53
   3  -2 -28   37.07    4.81
   3   2  29   24.16    4.61
   3  -2 -29   25.55    4.32
   3   2  29   25.45    5.17
   3  -2 -29   20.99    4.29
   3   2  30    4.96    3.79
   3  -2 -30    3.73    3.37
   3   2  30    5.36    4.44
   3  -2 -30    2.71    3.52
   3  -2 -31  275.08   11.84
   3   2  31  270.39   11.91
   3   2  31  217.95   12.27
   3  -2 -31  263.47   12.19
   3   2  32    9.79    3.55
   3  -2 -32   12.20    3.39
   3   2  32    2.65    4.28
   3  -2 -32    6.01    3.97
   3   2  33   14.72    3.32
   3  -2 -33   15.59    3.98
   3   2  34  259.66   10.93
   3   2  35   53.36    3.74
   3   2  36   81.31    4.34
   3   2  37   40.28    2.60
   3   2  38   38.54    2.03
   3  -3  39   92.34    3.91
   3  -3  38   32.61    2.36
   3  -3  37   66.20    3.90
   3  -3  36   27.11    3.00
  -3   3  36   28.88    2.38
   3  -3  35   20.02    3.22
  -3   3  35   25.62    2.62
   3  -3  34    4.29    2.94
  -3   3  34    6.33    2.32
   3  -3  33  150.37    8.19
   3  -3  33  163.84    6.82
  -3   3  33  165.33    7.66
   3  -3  32    7.41    1.92
   3  -3  32    9.11    3.53
  -3   3  32    7.47    2.68
   3  -3  31  163.98    9.43
   3  -3  31  200.04    8.32
  -3   3  31  192.18    9.00
   3  -3  30    1.22    2.22
   3  -3  30    5.35    3.96
  -3   3  30   -0.69    2.74
   3  -3  29   76.12    6.69
   3  -3  29   94.01    5.44
   3  -3  28   44.02    5.63
   3  -3  28   58.64    4.48
   3  -3  27    9.14    3.02
   3  -3  27    8.70    4.65
   3  -3  26   19.98    3.60
   3  -3  26   14.68    4.88
   3  -3  25  554.22   21.32
   3  -3  25  538.82   22.36
   3  -3  24   79.96    5.63
   3  -3  24   64.86    6.19
   3  -3  23  295.63   12.75
   3  -3  23  271.27   13.47
   3  -3  22   58.66    5.14
   3  -3  22   59.85    5.87
   3  -3  21   88.67    6.01
   3  -3  21   76.81    6.35
   3  -3  20  118.59    7.06
   3  -3  20  120.09    7.84
   3  -3  19  102.48    6.30
   3  -3  19   94.96    7.08
   3  -3  18  124.73    7.43
   3  -3  18  159.64    8.63
   3  -3  17  900.80   33.22
   3  -3  17  914.89   34.14
   3  -3  16  160.31    7.92
   3  -3  16  133.11    8.28
   3  -3  15  152.19    7.90
   3  -3  15  154.03    8.53
   3  -3  14   89.34    5.46
   3  -3  14   70.13    5.56
   3  -3  13  871.46   32.71
   3  -3  13  936.89   33.52
   3  -3  12   47.40    4.01
   3  -3  12   41.85    4.26
   3  -3  11   43.63    3.84
   3  -3  11   40.61    4.07
   3  -3  10   35.87    3.72
   3  -3   9  502.51   19.76
   3  -3   8  416.46   16.77
   3  -3   7  254.20   10.49
   3  -3   7  236.93   10.85
   3  -3   6  254.41   10.54
   3  -3   6  244.44   10.92
   3  -3   5  735.31   26.88
   3  -3   5  715.69   26.21
   3  -3   4  236.57   10.38
   3  -3   4  234.94    9.82
   3  -3   3   66.20    4.58
   3  -3   3   78.94    4.32
   3  -3   2  248.46   10.98
   3  -3   2  268.84   10.59
   3  -3   1  925.10   32.62
   3  -3   0  190.40    8.03
   3  -3  -1  890.75   31.31
   3  -3  -2  261.73   10.27
   3  -3  -3   54.43    3.15
   3   3   4  230.99    9.85
   3  -3  -4  219.30    9.34
   3  -3  -4  224.84    9.32
   3  -3  -4  229.19    8.98
   3   3   5  664.26   24.82
   3  -3  -5  651.66   24.25
   3  -3  -5  694.24   24.08
   3  -3  -5  663.28   23.63
   3  -3  -6  262.33   10.53
   3   3   6  258.91   11.05
   3  -3  -6  246.68   10.12
   3  -3  -6  250.95    9.75
   3   3   7  294.14   11.84
   3  -3  -7  281.95   11.22
   3   3   7  230.70   10.89
   3  -3  -7  260.32   10.60
   3  -3  -7  287.48   10.33
   3   3   8  333.13   14.93
   3  -3  -8  330.29   14.33
   3   3   8  401.09   14.75
   3  -3  -8  397.75   13.97
   3  -3  -9  561.69   19.85
   3   3   9  540.15   20.46
   3   3   9  452.89   19.51
   3  -3  -9  532.49   18.87
   3   3  10   19.21    3.31
   3   3  10   32.98    3.11
   3  -3 -10   26.64    2.23
   3  -3 -10   16.09    2.54
   3  -3 -11   61.08    4.22
   3   3  11   57.67    4.84
   3   3  11   54.45    4.23
   3  -3 -11   58.15    3.26
   3  -3 -12   51.18    3.92
   3   3  12   48.50    4.51
   3  -3 -12   33.95    3.06
   3   3  12   43.29    3.86
   3  -3 -12   48.88    2.86
   3  -3 -13  867.38   32.76
   3   3  13  919.96   33.54
   3   3  13  920.02   33.23
   3  -3 -13  920.89   31.48
   3  -3 -13  882.49   32.61
   3  -3 -14   88.87    5.30
   3   3  14   81.83    6.05
   3   3  14   68.57    5.26
   3  -3 -14   83.07    3.98
   3  -3 -14   69.80    4.68
   3  -3 -15  185.07    9.02
   3   3  15  194.39    9.77
   3   3  15  182.34    9.39
   3  -3 -15  191.17    7.58
   3  -3 -15  174.57    8.69
   3  -3 -16  163.63    8.08
   3   3  16  140.63    8.11
   3  -3 -16  157.71    6.51
   3  -3 -16  140.46    7.58
   3   3  17  913.41   33.21
   3  -3 -17  864.85   30.96
   3  -3 -17  909.53   32.62
   3   3  18  160.17    8.72
   3  -3 -18  149.09    8.05
   3   3  19   92.86    7.04
   3   3  19   96.49    6.76
   3  -3 -19   99.84    6.11
   3  -3 -20  110.31    6.94
   3   3  20  109.69    7.71
   3   3  20  110.19    7.38
   3  -3 -20  123.46    6.97
   3   3  21   80.52    6.68
   3  -3 -21   84.24    5.89
   3   3  21   49.88    5.54
   3  -3 -21   69.90    5.20
   3  -3 -22   55.75    5.11
   3   3  22   61.93    6.10
   3   3  22   41.44    5.24
   3  -3 -22   56.67    4.91
   3  -3 -23  296.11   12.63
   3   3  23  288.76   13.29
   3  -3 -23  272.31   12.30
   3  -3 -24   83.68    6.14
   3   3  24   78.94    6.96
   3   3  24   63.35    6.13
   3  -3 -24   81.37    6.01
   3  -3 -25  625.53   22.97
   3   3  25  580.02   23.45
   3   3  25  539.47   23.27
   3  -3 -25  561.68   22.86
   3   3  26   19.67    4.99
   3  -3 -26   15.68    4.04
   3   3  26   15.51    4.36
   3  -3 -26   16.99    3.83
   3   3  27    6.08    4.62
   3  -3 -27   10.07    3.78
   3   3  27    4.92    4.33
   3  -3 -27    4.14    3.57
   3  -3 -28   58.17    5.36
   3   3  28   62.64    6.11
   3   3  28   55.20    5.87
   3  -3 -28   53.00    5.33
   3  -3 -29  113.65    6.77
   3   3  29  106.30    7.32
   3   3  29   85.10    7.21
   3  -3 -29   91.03    6.84
   3   3  30    0.54    4.08
   3  -3 -30    2.13    3.13
   3   3  30    3.74    3.78
   3  -3 -30    4.68    3.57
   3  -3 -31  183.88    8.98
   3   3  31  193.18    9.34
   3   3  31  164.64    9.41
   3  -3 -31  169.62    9.28
   3   3  32   11.96    3.66
   3  -3 -32    7.77    2.95
   3   3  32    9.24    3.99
   3  -3 -32   10.47    3.63
   3  -3 -33  182.24    8.28
   3   3  33  172.70    8.40
   3   3  33  153.74    8.74
   3  -3 -33  172.79    8.70
   3   3  34    8.01    2.82
   3   3  34    3.22    3.29
   3  -3 -34    4.09    3.14
   3   3  35   23.96    2.84
   3   3  35   13.00    3.25
   3  -3 -35   13.98    3.13
   3   3  36   34.41    2.85
   3   3  36   30.16    3.37
   3   3  37   73.49    3.67
   3   3  37   75.37    4.45
   3   3  38   23.81    1.57
   3   3  38   33.44    2.60
   3   3  39  119.94    5.17
   3  -4  38    7.12    0.88
   3  -4  37    4.55    1.24
  -3   4  37    5.18    1.24
   3  -4  36   15.42    2.06
  -3   4  36   16.41    2.00
   3  -4  35   41.98    3.32
  -3   4  35   44.93    3.25
   3  -4  34  100.81    5.69
  -3   4  34  114.35    5.77
   3  -4  33   29.31    3.56
  -3   4  33   27.74    3.29
   3  -4  32  150.98    8.04
  -3   4  32  175.10    8.18
   3  -4  32  161.47    6.72
   3  -4  31  123.12    6.94
   3  -4  31  111.92    5.33
  -3   4  31  106.87    6.55
   3  -4  30   38.98    4.42
   3  -4  30   36.40    3.03
  -3   4  30   31.63    4.19
   3  -4  29   13.62    2.43
   3  -4  29   14.60    4.00
   3  -4  28   69.65    5.98
   3  -4  28   81.35    4.85
   3  -4  27  148.57    8.81
   3  -4  27  159.39    7.66
   3  -4  26  114.94    7.28
   3  -4  26   94.70    5.84
   3  -4  25   75.62    6.48
   3  -4  25   78.01    5.35
   3  -4  24   78.91    6.42
   3  -4  24   84.88    5.68
   3  -4  23   24.07    4.68
   3  -4  23   31.71    3.83
   3  -4  22  200.11   10.20
   3  -4  22  171.95    8.91
   3  -4  21  126.31    7.75
   3  -4  21  123.99    7.14
   3  -4  20   24.11    3.80
   3  -4  20   35.44    4.80
   3  -4  19  515.16   19.61
   3  -4  19  475.95   20.29
   3  -4  18  310.87   13.10
   3  -4  18  293.81   13.71
   3  -4  17  130.73    7.48
   3  -4  17  168.19    8.60
   3  -4  16  225.97   10.17
   3  -4  16  209.12   10.69
   3  -4  15  499.61   20.14
   3  -4  15  557.57   21.16
   3  -4  14   24.75    3.43
   3  -4  14   29.77    4.06
   3  -4  13  176.99    8.51
   3  -4  13  180.44    9.21
   3  -4  12  123.02    7.15
   3  -4  12  124.33    6.59
   3  -4  11  124.84    7.23
   3  -4  11  134.38    6.84
   3  -4  10  387.48   15.22
   3  -4  10  338.26   14.27
   3  -4   9   98.55    5.84
   3  -4   9   77.47    4.95
   3  -4   8  100.03    6.05
   3  -4   7  367.96   15.14
   3  -4   6  364.62   14.88
   3  -4   5   81.47    5.06
   3  -4   5   66.61    4.31
   3  -4   4  233.07   10.56
   3  -4   4  244.64    9.99
   3  -4   3  164.05    7.66
   3  -4   3  142.56    6.85
   3  -4   2  424.90   16.00
   3  -4   1  171.54    7.46
   3  -4   0   12.57    1.89
   3  -4  -1  162.11    7.04
   3  -4  -2  405.88   15.10
   3  -4  -3  136.67    6.47
   3   4   3  140.18    6.86
   3  -4  -3  143.23    6.21
   3   4   4  242.77   10.53
   3  -4  -4  235.32   10.05
   3  -4  -4  249.76    9.63
   3  -4  -5   73.39    4.38
   3   4   5   70.21    4.69
   3  -4  -5   76.34    4.26
   3  -4  -5   73.29    3.81
   3  -4  -6  425.49   15.97
   3  -4  -6  386.50   15.34
   3  -4  -6  420.79   15.16
   3  -4  -7  283.59   12.61
   3  -4  -7  302.01   11.93
   3  -4  -8   81.54    4.93
   3  -4  -8   79.82    4.32
   3  -4  -8   83.40    4.14
   3  -4  -9   76.33    4.85
   3  -4  -9   90.87    4.39
   3  -4  -9   76.93    4.10
   3  -4 -10  304.56   13.10
   3  -4 -10  336.49   12.18
   3  -4 -10  309.71   12.17
   3  -4 -11  140.26    6.94
   3   4  11  112.58    6.34
   3  -4 -11  130.27    5.73
   3  -4 -11  124.40    5.76
   3  -4 -12  143.65    7.15
   3   4  12  127.19    6.79
   3  -4 -12  132.93    5.93
   3  -4 -13  183.25    8.96
   3   4  13  194.77    8.98
   3  -4 -13  190.28    7.75
   3  -4 -13  181.51    8.59
   3  -4 -14   31.42    3.46
   3   4  14   34.97    3.48
   3  -4 -14   31.83    2.57
   3  -4 -14   34.77    3.15
   3  -4 -15  513.20   20.47
   3   4  15  530.89   20.68
   3  -4 -15  525.54   19.02
   3  -4 -15  527.78   20.22
   3  -4 -16  244.23   10.71
   3   4  16  209.80   10.46
   3  -4 -16  229.31    9.00
   3  -4 -16  201.20   10.01
   3   4  17  153.63    8.21
   3  -4 -17  150.86    7.86
   3   4  18  258.44   12.15
   3  -4 -18  269.17   11.89
   3   4  19  465.56   19.36
   3  -4 -19  478.94   18.99
   3  -4 -20   13.82    3.61
   3   4  20   25.63    3.96
   3  -4 -20   20.32    3.41
   3  -4 -21  107.18    7.13
   3   4  21  115.54    8.07
   3   4  21  110.86    7.31
   3  -4 -21  118.75    7.04
   3  -4 -22  182.90   10.00
   3   4  22  195.05   11.03
   3  -4 -22  216.20   10.18
   3   4  22  207.16   10.50
   3   4  23   41.47    5.85
   3  -4 -23   46.41    4.89
   3   4  23   33.21    4.66
   3  -4 -23   40.78    4.34
   3  -4 -24   65.99    5.77
   3   4  24   71.22    6.81
   3   4  24   65.62    5.98
   3  -4 -24   68.75    5.48
   3  -4 -25   95.77    6.56
   3   4  25   95.24    7.64
   3   4  25   78.27    6.56
   3  -4 -25   90.34    6.28
   3  -4 -26   98.64    6.71
   3   4  26   90.01    7.59
   3   4  26  107.85    7.27
   3  -4 -26  101.65    6.86
   3  -4 -27  145.26    8.30
   3   4  27  148.18    9.18
   3   4  27  144.23    8.48
   3  -4 -27  140.12    8.20
   3  -4 -28   73.93    5.55
   3   4  28   73.79    6.76
   3   4  28   51.93    5.53
   3  -4 -28   63.12    5.41
   3   4  29   15.28    4.89
   3  -4 -29   12.98    3.79
   3   4  29   15.61    3.88
   3  -4 -29   16.07    3.74
   3  -4 -30   45.10    4.46
   3   4  30   40.31    5.29
   3   4  30   43.55    4.83
   3  -4 -30   46.52    4.71
   3  -4 -31  118.23    6.89
   3   4  31  122.96    7.44
   3   4  31  128.76    7.42
   3  -4 -31  128.28    7.30
   3  -4 -32  207.18    9.28
   3   4  32  205.24    9.53
   3   4  32  194.06    9.47
   3  -4 -32  183.19    9.31
   3   4  33   22.14    3.59
   3  -4 -33   23.20    3.24
   3   4  33   30.17    3.79
   3  -4 -33   25.16    3.64
   3  -4 -34  103.41    5.63
   3   4  34  108.89    5.83
   3   4  34  100.80    5.86
   3  -4 -34  104.42    6.04
   3   4  35   38.69    3.25
   3   4  35   36.11    3.41
   3  -4 -35   37.49    3.65
   3   4  36   19.80    2.25
   3   4  36   13.70    2.31
   3   4  37    5.86    1.35
   3   4  37    5.07    1.62
   3   4  38    7.59    0.89
   3   4  38   10.29    1.42
  -3   5  36    4.45    1.53
   3  -5  35   26.72    2.11
  -3   5  35   29.29    2.65
   3  -5  34   26.67    2.50
  -3   5  34   38.29    3.21
   3  -5  33   31.94    2.95
  -3   5  33   32.12    3.48
   3  -5  32  124.80    6.54
  -3   5  32  148.01    7.23
   3  -5  31   37.98    3.70
   3  -5  31   41.94    2.56
  -3   5  31   40.63    4.30
   3  -5  30   82.81    5.51
  -3   5  30   89.48    6.22
   3  -5  30   99.03    4.56
   3  -5  29   17.05    3.49
   3  -5  29   17.98    2.25
   3  -5  28   23.59    3.97
   3  -5  28   39.99    3.13
   3  -5  27  111.18    7.03
   3  -5  27  127.40    6.16
   3  -5  26  128.87    7.89
   3  -5  26  153.36    7.10
   3  -5  25   74.08    5.85
   3  -5  25   74.09    4.79
   3  -5  24   58.30    5.54
   3  -5  24   60.08    4.51
   3  -5  23  186.62    9.88
   3  -5  23  183.48    8.73
   3  -5  22  380.68   16.72
   3  -5  22  401.03   15.77
   3  -5  21  144.47    8.58
   3  -5  21  155.56    7.82
   3  -5  20  160.86    8.87
   3  -5  20  161.85    8.13
   3  -5  19  110.32    7.08
   3  -5  19   99.56    6.11
   3  -5  18  264.60   13.07
   3  -5  18  309.18   12.53
   3  -5  17  775.87   28.33
   3  -5  17  708.86   27.13
   3  -5  16   61.72    5.57
   3  -5  16   82.57    5.27
   3  -5  15   58.87    4.97
   3  -5  15   50.82    4.28
   3  -5  14   21.54    3.88
   3  -5  14   24.85    3.23
   3  -5  13  778.53   29.14
   3  -5  13  764.42   28.22
   3  -5  12  945.96   34.61
   3  -5  12  931.43   33.72
   3  -5  11   92.58    6.27
   3  -5  11  104.12    5.70
   3  -5  10   65.43    5.13
   3  -5  10   71.05    4.63
   3  -5   9   99.24    6.26
   3  -5   9  111.08    5.83
   3  -5   8  269.37   11.66
   3  -5   8  254.67   10.91
   3  -5   7   58.14    4.42
   3  -5   7   49.24    3.80
   3  -5   6   44.17    3.94
   3  -5   5  344.42   14.28
   3  -5   4  291.18   11.72
   3  -5   3   80.21    4.55
   3  -5   2  101.42    5.18
   3  -5   1  282.48   11.72
   3  -5   1  299.80   11.55
   3  -5   0  153.01    7.28
   3  -5   0  165.73    7.13
   3  -5  -1  288.23   11.61
   3  -5  -1  288.97   11.37
   3  -5  -2   78.71    4.70
   3  -5  -2   91.38    4.55
   3  -5  -3   82.68    4.69
   3  -5  -3   84.61    4.71
   3  -5  -3   87.26    4.45
   3  -5  -4  377.00   14.59
   3  -5  -4  345.95   14.03
   3  -5  -4  385.48   14.02
   3  -5  -5  316.05   13.22
   3  -5  -5  339.92   12.67
   3  -5  -6   52.97    3.88
   3  -5  -6   53.25    3.30
   3  -5  -7   52.80    3.99
   3  -5  -7   56.08    3.42
   3  -5  -8  233.76   10.47
   3  -5  -8  242.12    9.68
   3  -5  -9  122.94    6.47
   3  -5  -9  104.88    5.35
   3  -5  -9  122.64    5.63
   3  -5 -10   85.94    5.37
   3  -5 -10   88.68    4.47
   3  -5 -10   84.48    4.58
   3  -5 -11   92.84    5.72
   3  -5 -11   91.67    4.61
   3  -5 -11   86.87    4.74
   3  -5 -12  922.20   33.51
   3  -5 -12  920.71   32.03
   3  -5 -12  903.31   32.51
   3  -5 -13  753.54   27.63
   3  -5 -13  740.57   26.05
   3  -5 -13  713.76   26.55
   3  -5 -14   24.20    3.31
   3  -5 -14   19.46    2.37
   3  -5 -14   17.55    2.26
   3  -5 -14   16.25    2.50
   3  -5 -15   44.06    4.35
   3  -5 -15   44.27    3.82
   3   5  15   48.20    3.94
   3  -5 -15   45.93    3.30
   3  -5 -16  104.63    6.32
   3  -5 -16   83.69    5.38
   3   5  16   77.79    5.35
   3  -5 -16   89.85    4.73
   3  -5 -17  654.39   27.08
   3  -5 -17  766.81   27.13
   3   5  17  731.60   27.16
   3  -5 -18  280.00   12.05
   3   5  18  257.23   11.98
   3  -5 -19  104.35    6.34
   3   5  19   99.67    6.36
   3   5  20  161.58    8.60
   3  -5 -20  163.67    8.51
   3  -5 -21  151.69    8.54
   3   5  21  148.15    8.31
   3  -5 -21  160.11    8.35
   3  -5 -22  447.54   17.53
   3   5  22  408.46   18.25
   3   5  22  396.37   17.17
   3  -5 -22  413.56   17.24
   3  -5 -23  159.27    9.18
   3   5  23  182.84   10.43
   3   5  23  173.95    9.07
   3  -5 -23  174.68    9.06
   3   5  24   39.23    5.99
   3  -5 -24   47.71    5.07
   3   5  24   50.40    4.80
   3  -5 -24   48.83    4.59
   3  -5 -25   69.91    6.05
   3   5  25   79.72    7.26
   3   5  25   80.53    5.98
   3  -5 -25   84.00    5.80
   3  -5 -26  129.94    7.75
   3   5  26  144.31    8.86
   3   5  26  108.19    7.14
   3  -5 -26  116.89    7.19
   3  -5 -27  140.93    7.60
   3   5  27  123.64    8.59
   3   5  27  115.68    7.18
   3  -5 -27  119.43    7.25
   3   5  28   34.11    5.47
   3  -5 -28   24.74    4.32
   3   5  28   17.50    3.61
   3  -5 -28   21.12    3.59
   3  -5 -29   15.98    3.56
   3   5  29   12.28    4.71
   3   5  29    9.96    3.22
   3  -5 -29   12.10    3.22
   3  -5 -30  113.05    6.34
   3   5  30  113.67    7.10
   3   5  30   89.54    6.02
   3  -5 -30   99.29    6.27
   3  -5 -31   52.04    4.48
   3   5  31   56.54    5.27
   3   5  31   47.56    4.16
   3  -5 -31   47.49    4.32
   3  -5 -32  164.50    7.52
   3   5  32  168.26    7.99
   3   5  32  131.83    7.20
   3  -5 -32  140.93    7.52
   3  -5 -33   28.40    3.15
   3   5  33   31.63    3.83
   3   5  33   34.17    3.18
   3  -5 -33   33.13    3.38
   3  -5 -34   41.18    3.12
   3   5  34   37.65    3.46
   3   5  34   28.16    2.79
   3  -5 -34   33.72    3.35
   3   5  35   29.76    2.83
   3   5  35   27.87    2.52
   3  -5 -35   27.50    2.77
   3   5  36    4.42    1.61
   3   5  36    3.76    1.28
   3   5  37    7.30    1.13
   3   5  37    4.40    0.92
  -3   6  36   10.77    1.53
  -3   6  35   56.57    3.39
  -3   6  34    0.52    1.92
  -3   6  33   31.10    3.20
   3  -6  32   24.30    2.25
  -3   6  32   29.33    3.44
   3  -6  31   45.83    3.27
  -3   6  31   51.05    4.45
   3  -6  30    9.92    2.25
  -3   6  30   10.79    3.51
   3  -6  29    1.81    1.31
   3  -6  29    5.38    2.35
   3  -6  28   26.79    3.29
   3  -6  28   32.88    2.53
   3  -6  27   66.77    4.94
   3  -6  27   75.91    4.10
   3  -6  26  140.19    7.38
   3  -6  26  134.64    6.34
   3  -6  25   91.39    5.82
   3  -6  25   81.24    4.71
   3  -6  24   10.04    2.48
   3  -6  24    7.93    3.31
   3  -6  23  107.41    7.00
   3  -6  23  136.10    6.51
   3  -6  22    6.19    2.53
   3  -6  22    6.27    3.06
   3  -6  21  341.06   14.55
   3  -6  21  331.70   13.57
   3  -6  20    4.00    2.68
   3  -6  20   12.63    3.57
   3  -6  19  544.34   21.85
   3  -6  19  566.03   21.10
   3  -6  18   80.99    5.79
   3  -6  18   56.62    4.64
   3  -6  17  260.25   11.95
   3  -6  17  254.23   11.09
   3  -6  16  437.01   17.65
   3  -6  16  420.20   16.76
   3  -6  15  741.88   28.17
   3  -6  15  745.55   27.33
   3  -6  14  473.41   19.25
   3  -6  14  484.26   18.51
   3  -6  13  528.69   20.28
   3  -6  13  493.39   19.34
   3  -6  12   10.98    2.72
   3  -6  12   16.21    3.44
   3  -6  11  294.50   12.89
   3  -6  11  291.85   12.11
   3  -6  10   43.68    4.27
   3  -6  10   54.73    4.02
   3  -6   9  548.69   20.98
   3  -6   9  525.95   20.09
   3  -6   8  133.36    7.42
   3  -6   8  145.91    6.92
   3  -6   7  265.57   10.97
   3  -6   6  161.47    7.49
   3  -6   5  274.12   11.37
   3  -6   4  246.10   10.40
   3  -6   3  245.19   10.30
   3  -6   2   26.11    3.04
   3  -6   2   25.00    2.62
   3  -6   1   41.36    3.47
   3  -6   1   42.97    3.26
   3  -6   0  120.01    6.04
   3  -6   0  122.48    5.87
   3  -6  -1   44.48    3.40
   3  -6  -1   40.80    3.10
   3  -6  -2   28.62    2.75
   3  -6  -2   25.06    2.84
   3  -6  -2   29.79    2.70
   3  -6  -3  203.61    9.34
   3  -6  -3  215.44    9.02
   3  -6  -3  220.10    9.00
   3  -6  -4  267.25   11.32
   3  -6  -4  261.49   10.68
   3  -6  -4  272.65   10.78
   3  -6  -5  285.18   12.30
   3  -6  -5  301.75   11.60
   3  -6  -5  293.58   11.70
   3  -6  -6  172.53    8.34
   3  -6  -6  169.16    7.47
   3  -6  -6  178.30    7.73
   3  -6  -7  210.57   10.28
   3  -6  -7  255.20    9.57
   3  -6  -7  227.40    9.73
   3  -6  -8  147.54    7.39
   3  -6  -8  129.94    6.17
   3  -6  -8  140.66    6.60
   3  -6  -9  536.19   20.71
   3  -6  -9  529.63   19.85
   3  -6 -10   57.05    4.48
   3  -6 -10   48.52    3.71
   3  -6 -11  340.56   13.96
   3  -6 -11  314.52   13.03
   3  -6 -12   10.81    2.76
   3  -6 -12   13.03    2.37
   3  -6 -13  464.78   18.39
   3  -6 -13  443.15   16.70
   3  -6 -13  452.90   17.43
   3  -6 -14  471.23   18.32
   3  -6 -14  436.69   16.56
   3  -6 -14  432.28   17.13
   3  -6 -15  731.50   25.32
   3  -6 -15  675.54   23.44
   3  -6 -15  636.39   24.08
   3  -6 -16  396.62   16.31
   3  -6 -16  403.85   15.83
   3  -6 -16  363.73   15.21
   3  -6 -17  294.09   13.10
   3  -6 -17  287.38   12.52
   3  -6 -18   78.57    5.33
   3  -6 -19  553.74   20.75
   3   6  19  500.81   20.10
   3   6  20    9.84    2.50
   3  -6 -20    5.84    2.68
   3  -6 -21  241.99   12.80
   3   6  21  300.05   12.44
   3  -6 -21  315.48   12.90
   3  -6 -22    7.49    3.55
   3   6  22    3.66    2.34
   3  -6 -22    5.74    2.86
   3  -6 -23  111.50    7.32
   3   6  23  101.42    6.14
   3  -6 -23  108.58    6.53
   3   6  24   11.37    5.40
   3  -6 -24    8.35    3.91
   3   6  24    5.70    2.44
   3  -6 -24    4.83    2.88
   3  -6 -25   97.22    6.76
   3   6  25   97.73    8.05
   3   6  25  104.23    6.07
   3  -6 -25  110.15    6.53
   3  -6 -26  130.43    8.00
   3   6  26  155.34    9.31
   3   6  26  140.99    7.25
   3  -6 -26  137.98    7.66
   3  -6 -27   87.13    5.90
   3   6  27   79.24    7.01
   3   6  27   65.03    4.71
   3  -6 -27   69.52    5.35
   3   6  28   34.67    5.57
   3  -6 -28   30.87    4.28
   3   6  28   26.95    3.27
   3  -6 -28   26.83    3.56
   3   6  29    3.92    4.07
   3  -6 -29    1.36    2.86
   3   6  29    1.87    2.21
   3  -6 -29    4.56    2.86
   3   6  30   10.58    4.12
   3  -6 -30    8.47    3.04
   3   6  30   13.38    2.44
   3  -6 -30   12.12    2.87
   3  -6 -31   50.48    4.10
   3   6  31   48.74    4.72
   3   6  31   41.76    3.25
   3  -6 -31   43.79    3.86
   3  -6 -32   28.35    3.18
   3   6  32   32.38    3.93
   3   6  32   24.29    2.39
   3  -6 -32   29.97    3.15
   3  -6 -33   23.65    2.59
   3   6  33   25.32    3.11
   3   6  33   20.01    1.97
   3  -6 -33   22.88    2.74
   3   6  34    0.97    2.03
   3  -6 -34    0.11    1.61
   3   6  34    0.52    0.96
   3  -6 -34   -1.20    1.78
   3   6  35   69.43    3.61
   3  -6 -35   56.16    3.41
   3   6  36   11.28    1.41
  -3   7  35   32.58    2.20
  -3   7  34   71.86    3.86
  -3   7  33   24.51    2.62
  -3   7  32   21.09    2.89
  -3   7  31    5.21    2.80
  -3   7  30   39.51    4.10
  -3   7  29    8.03    3.52
   3  -7  28   74.57    3.61
   3  -7  27   30.00    2.89
   3  -7  27   34.22    2.42
   3  -7  26   50.93    3.89
   3  -7  26   62.15    3.45
   3  -7  25  163.81    7.98
   3  -7  25  181.04    7.45
   3  -7  24   98.83    5.72
   3  -7  24   97.59    5.04
   3  -7  23   33.89    3.65
   3  -7  23   38.00    3.19
   3  -7  22   36.16    3.83
   3  -7  22   39.85    3.34
   3  -7  21  127.03    7.15
   3  -7  21  140.89    6.63
   3  -7  20  223.18   10.06
   3  -7  20  202.14    9.15
   3  -7  19   33.00    3.01
   3  -7  19   37.87    4.01
   3  -7  19   37.22    3.50
   3  -7  18  135.17    6.70
   3  -7  18  146.57    7.76
   3  -7  18  153.59    7.18
   3  -7  17  339.11   13.94
   3  -7  17  353.23   14.99
   3  -7  17  390.65   14.47
   3  -7  16  357.88   14.58
   3  -7  16  383.99   15.63
   3  -7  16  394.04   14.97
   3  -7  15  337.28   13.72
   3  -7  15  355.46   14.68
   3  -7  15  355.04   13.99
   3  -7  14  186.68    8.49
   3  -7  14  221.61    9.67
   3  -7  14  173.91    8.54
   3  -7  13  561.77   21.23
   3  -7  13  591.05   22.24
   3  -7  13  570.77   21.42
   3  -7  12   72.80    4.57
   3  -7  12   58.03    4.35
   3  -7  11  103.93    5.88
   3  -7  11  132.86    6.36
  -3  -7 -11  103.55    7.36
   3  -7  10 1509.83   52.98
   3  -7  10 1533.60   53.08
  -3  -7 -10 1537.13   55.24
   3  -7   9  168.70    7.66
   3  -7   9  153.58    7.57
  -3  -7  -9  169.07    9.49
   3  -7   8    9.64    2.60
   3  -7   8   19.06    2.87
   3  -7   7  365.01   14.15
   3  -7   7  353.22   14.14
   3  -7   6  354.43   14.07
   3  -7   6  362.03   14.12
   3  -7   5  113.49    6.02
   3  -7   5  123.87    6.11
   3  -7   4  374.97   14.62
   3  -7   4  381.46   14.69
   3  -7   3   90.37    5.08
   3  -7   2  178.24    7.93
   3  -7   1   54.16    3.81
   3  -7   0   61.40    4.10
   3  -7   0   69.96    4.33
   3  -7  -1   61.85    3.99
   3  -7  -1   60.96    4.09
   3  -7  -2  162.92    8.13
   3  -7  -2  180.38    7.72
   3  -7  -2  184.55    8.00
   3  -7  -3   86.61    5.21
   3  -7  -3   83.84    4.65
   3  -7  -3   85.85    4.92
   3  -7  -4  356.97   14.67
   3  -7  -4  355.87   13.71
   3  -7  -4  368.27   14.18
   3  -7  -5  108.00    6.07
   3  -7  -5  102.88    5.24
   3  -7  -5  104.72    5.67
   3  -7  -6  334.80   13.84
   3  -7  -6  322.10   12.65
   3  -7  -6  333.54   13.22
   3  -7  -7  362.23   15.00
   3  -7  -7  362.66   13.70
   3  -7  -7  358.24   14.34
   3  -7  -8    8.94    2.34
   3  -7  -8   12.55    2.90
   3  -7  -8    8.38    2.25
   3  -7  -9  146.18    8.02
   3  -7  -9  156.60    6.90
   3  -7  -9  160.52    7.69
   3  -7 -10 1606.62   56.09
   3  -7 -10 1600.88   54.37
   3  -7 -10 1536.65   55.18
   3  -7 -11  117.85    6.70
   3  -7 -11   97.55    5.16
   3  -7 -11  100.94    5.94
   3  -7 -12   55.59    5.03
   3  -7 -12   67.28    4.10
   3  -7 -12   65.58    4.60
   3  -7 -13  613.39   23.65
   3  -7 -13  599.57   22.81
   3  -7 -14  177.79    9.28
   3  -7 -14  179.17    8.58
   3  -7 -15  348.69   13.82
   3  -7 -15  322.37   12.78
   3  -7 -16  424.74   16.35
   3  -7 -16  343.81   14.97
   3  -7 -17  380.12   15.64
   3  -7 -17  336.68   14.46
   3  -7 -18  107.54    7.13
   3  -7 -18  123.94    6.67
   3  -7 -19   48.56    4.22
   3  -7 -20  201.25    9.56
   3  -7 -21  128.76    7.04
   3  -7 -22   40.27    4.89
   3  -7 -22   37.03    3.80
   3  -7 -23   37.37    4.68
   3  -7 -23   28.62    3.55
   3  -7 -24   95.39    7.10
   3  -7 -24  120.98    6.56
   3  -7 -25  197.63    9.53
   3   7  25  178.68   10.32
   3  -7 -25  172.28    8.59
   3  -7 -26   74.39    5.36
   3   7  26   72.28    6.63
   3  -7 -26   52.24    4.42
   3  -7 -27   42.84    4.51
   3   7  27   47.07    5.70
   3  -7 -27   34.39    3.57
   3  -7 -28   82.67    5.53
   3   7  28   76.70    6.15
   3  -7 -28   79.69    4.99
   3  -7 -29    9.15    2.83
   3   7  29    4.38    3.85
   3  -7 -29    5.68    2.34
   3  -7 -30   42.34    3.74
   3   7  30   43.85    4.51
   3  -7 -30   32.66    3.19
   3   7  31    7.65    3.11
   3  -7 -31    6.22    2.24
   3  -7 -31    7.67    2.06
   3   7  32   21.44    3.02
   3  -7 -32   23.66    2.58
   3  -7 -32   14.68    2.10
   3  -7 -33   23.24    2.21
   3   7  33   23.78    2.65
   3  -7 -33   15.55    1.95
   3  -7 -34   63.99    3.04
   3   7  34   66.35    3.33
   3   7  35   32.50    2.07
  -3   8  34   18.68    1.53
  -3   8  33    0.80    1.37
  -3   8  32   47.57    3.23
  -3   8  31   34.15    3.15
  -3   8  30   -0.85    2.43
  -3   8  29   68.84    4.83
  -3   8  28   26.36    3.88
   3  -8  26   63.09    3.28
   3  -8  25   24.41    2.14
   3  -8  24   69.08    3.77
   3  -8  23   10.13    1.97
   3  -8  22   50.06    3.40
   3  -8  21  101.42    5.28
   3  -8  20   94.39    5.09
   3  -8  19   24.60    2.89
   3  -8  18   55.21    3.98
   3  -8  17  190.74    8.49
   3  -8  16   12.43    2.78
   3  -8  16   12.10    2.01
   3  -8  15  216.61    9.25
   3  -8  15  252.91    9.99
  -3  -8 -15  217.72   11.51
   3  -8  14    9.45    2.74
   3  -8  14   12.87    2.27
  -3  -8 -14   12.40    4.10
   3  -8  13   43.05    3.30
   3  -8  13   46.20    3.81
  -3  -8 -13   43.21    5.06
   3  -8  12  134.69    6.48
   3  -8  12  143.66    6.97
  -3  -8 -12  142.01    8.92
   3  -8  11  204.91    8.56
   3  -8  11  186.08    8.70
  -3  -8 -11  203.48   11.01
   3  -8  10  161.44    7.49
   3  -8  10  181.68    8.07
  -3  -8 -10  163.76    9.81
   3  -8   9  164.14    7.34
   3  -8   9  157.62    7.64
  -3  -8  -9  162.79    9.61
   3  -8   8   39.44    3.36
   3  -8   8   49.20    3.89
  -3  -8  -8   44.60    5.40
   3  -8   7  304.05   12.12
   3  -8   7  312.51   12.55
   3  -8   6   19.49    2.93
  -3  -8  -6   16.89    3.05
   3  -8   6   17.06    2.54
  -3  -8  -5   66.61    4.91
   3  -8   5   55.02    3.84
   3  -8   5   62.02    4.29
   3  -8   4  240.07    9.75
   3  -8   4  230.71   10.06
   3  -8   3   79.37    4.65
   3  -8   3   83.09    4.98
   3  -8   2   20.29    2.93
   3  -8   2   23.19    2.69
   3  -8   1  317.48   12.37
   3  -8   0   15.92    2.41
   3  -8  -1  281.02   12.20
   3  -8  -1  309.47   11.67
   3  -8  -2   21.11    2.66
   3  -8  -2   21.62    2.63
   3  -8  -2   21.09    3.10
   3  -8  -3   59.24    4.45
   3  -8  -3   72.07    4.11
   3  -8  -3   72.06    4.71
   3  -8  -4  191.62   10.12
   3  -8  -4  255.76    9.59
   3  -8  -4  247.20   10.37
   3  -8  -5   60.31    4.59
   3  -8  -5   62.89    3.90
   3  -8  -5   65.61    4.61
   3  -8  -6   17.03    3.11
   3  -8  -6   15.34    2.84
   3  -8  -6   19.56    2.58
   3  -8  -7  311.78   13.42
   3  -8  -7  315.84   12.10
   3  -8  -7  303.80   12.98
   3  -8  -8   48.92    4.38
   3  -8  -8   44.29    3.44
   3  -8  -8   45.69    4.21
   3  -8  -9  144.48    7.94
   3  -8  -9  153.99    6.80
   3  -8  -9  137.43    7.49
   3  -8 -10  167.32    8.59
   3  -8 -10  150.43    7.04
   3  -8 -10  155.40    7.99
   3  -8 -11  179.05    9.47
   3  -8 -11  201.71    8.40
   3  -8 -11  187.61    9.21
   3  -8 -12  165.18    8.63
   3  -8 -12  147.95    7.85
   3  -8 -13   54.93    4.84
   3  -8 -13   50.01    4.37
   3  -8 -14   10.29    3.04
   3  -8 -14    5.67    2.94
   3  -8 -15  259.10   12.06
   3  -8 -16    7.43    3.47
   3  -8 -17  184.87    9.11
   3  -8 -17  154.97    7.81
   3  -8 -18   42.64    4.86
   3  -8 -18   38.91    3.45
   3  -8 -19   37.59    3.49
   3  -8 -20   86.13    5.26
   3  -8 -21  103.52    5.83
   3  -8 -22   52.93    4.01
   3  -8 -23   18.20    3.70
   3  -8 -23   14.18    2.67
   3  -8 -24   71.70    5.35
   3  -8 -24   61.33    4.29
   3  -8 -25   27.16    4.02
   3  -8 -25   22.31    2.80
   3  -8 -26   74.75    5.04
   3  -8 -26   65.57    4.29
   3  -8 -27    4.33    2.83
   3   8  27    4.60    3.68
   3  -8 -27    5.98    1.90
   3  -8 -28   39.91    3.66
   3   8  28   41.90    4.42
   3  -8 -28   26.84    2.65
   3  -8 -29   70.55    4.32
   3   8  29   66.74    4.84
   3  -8 -29   55.11    3.52
   3   8  30    0.43    2.65
   3  -8 -30    0.37    1.99
   3  -8 -30    1.11    1.42
   3  -8 -31   30.51    2.58
   3   8  31   30.55    3.03
   3  -8 -31   19.82    1.89
   3  -8 -32   47.30    2.64
   3   8  32   47.09    3.00
   3   8  33    2.31    1.37
   3  -8 -33    3.56    1.11
   3   8  34   13.67    1.23
  -3   9  27   69.68    4.72
  -3   9  26   -0.34    2.90
   3  -9  24    7.74    1.53
   3  -9  23   73.24    3.83
   3  -9  22    5.24    1.75
   3  -9  21  198.44    8.24
   3  -9  20   18.04    2.39
   3  -9  19   18.29    2.47
   3  -9  18   12.03    2.43
  -3  -9 -17   76.03    6.07
   3  -9  17   87.97    4.95
  -3  -9 -16   32.71    4.60
   3  -9  16   40.28    3.45
  -3  -9 -15   57.70    5.76
   3  -9  15   58.74    4.15
  -3  -9 -14  109.15    7.80
   3  -9  14  110.57    5.91
  -3  -9 -13  629.51   26.36
   3  -9  13  670.67   24.16
   3  -9  12  287.82   11.09
  -3  -9 -12  308.42   14.49
   3  -9  12  289.73   11.97
   3  -9  11  316.82   12.04
  -3  -9 -11  331.21   15.43
   3  -9  11  316.72   12.96
   3  -9  10  585.57   21.33
   3  -9  10  612.91   22.24
  -3  -9 -10  605.91   24.75
   3  -9   9   17.52    3.21
   3  -9   9   14.46    2.12
  -3  -9  -9    9.87    4.27
   3  -9   8  167.34    7.26
   3  -9   8  178.74    8.24
  -3  -9  -8  182.03   10.55
  -3  -9  -7   72.88    5.30
   3  -9   7   70.61    3.99
   3  -9   7   72.16    4.92
  -3  -9  -7   82.81    6.93
   3  -9   6   13.74    2.94
  -3  -9  -6   11.38    2.98
   3  -9   6   16.89    2.19
  -3  -9  -5  243.81   11.54
   3  -9   5  253.02    9.97
   3  -9   5  251.87   10.84
  -3  -9  -4  208.50    9.83
   3  -9   4  178.41    7.86
   3  -9   4  195.85    8.95
  -3  -9  -3  316.52   14.11
   3  -9   3  324.19   12.36
   3  -9   3  320.67   13.25
   3  -9   2   52.46    3.41
   3  -9   2   53.70    4.45
   3  -9   1   64.30    3.70
   3  -9   1   46.32    4.42
   3  -9   0  679.06   24.21
   3  -9  -1   44.19    3.68
   3  -9  -1   70.15    3.82
   3  -9  -2   59.60    4.18
   3  -9  -2   53.75    3.52
   3  -9  -3  282.94   13.01
   3  -9  -3  341.91   12.34
   3  -9  -4  174.69    8.70
   3  -9  -4  180.70    7.71
   3  -9  -4  188.86    8.95
   3  -9  -5  238.89   10.99
   3  -9  -5  250.18    9.93
   3  -9  -5  243.98   11.01
   3  -9  -6   18.33    3.58
   3  -9  -6   11.34    2.81
   3  -9  -6   16.01    2.62
   3  -9  -7   81.78    5.52
   3  -9  -7   80.53    4.63
   3  -9  -7   76.52    5.65
   3  -9  -8  168.01    8.61
   3  -9  -8  170.16    7.51
   3  -9  -8  160.75    8.49
   3  -9  -9   12.21    3.25
   3  -9  -9    5.84    3.34
   3  -9 -10  630.23   23.49
   3  -9 -10  579.79   23.01
   3  -9 -11  295.22   12.87
   3  -9 -11  275.50   12.48
   3  -9 -12  293.92   13.07
   3  -9 -12  289.89   12.79
   3  -9 -13  740.19   26.31
   3  -9 -13  634.89   25.55
   3  -9 -14  113.83    7.05
   3  -9 -15   45.84    4.82
   3  -9 -16   37.35    4.43
   3  -9 -17  119.00    7.06
   3  -9 -18   11.59    3.66
   3  -9 -19   21.29    4.00
   3  -9 -20   15.26    2.07
   3  -9 -21  150.49    6.87
   3  -9 -22    4.17    1.63
   3  -9 -23   75.48    5.34
   3   9  23   84.41    6.21
   3  -9 -23   64.82    3.93
   3  -9 -24   10.03    2.94
   3  -9 -24    8.22    1.61
   3  -9 -25   25.53    3.29
   3  -9 -25   14.54    1.93
   3  -9 -26   -0.83    2.48
   3  -9 -26    0.10    1.09
   3  -9 -27   75.83    4.14
   3  -9 -27   42.59    2.76
   3  -9 -28   15.50    2.40
   3   9  28   12.74    2.87
   3  -9 -28    8.34    1.24
   3  -9 -29   51.11    2.98
   3   9  29   52.13    3.43
   3  -9 -30    3.70    1.45
   3   9  30    3.20    1.83
   3  -9 -31   16.87    1.58
   3   9  31   15.05    1.86
   3  -9 -32   28.98    1.67
   3   9  32   27.26    1.78
  -3  10  29   36.94    2.19
  -3  10  28   21.19    1.97
  -3  10  27    3.06    1.74
  -3  10  26   16.43    2.47
  -3  10  25   28.00    2.94
  -3  10  24  148.59    7.22
   3 -10  22   16.69    1.84
   3 -10  21   16.46    2.01
   3 -10  20   13.43    2.07
   3 -10  19   43.35    3.15
  -3 -10 -18   18.24    3.26
   3 -10  18   24.07    2.69
   3 -10  17  426.32   16.04
  -3 -10 -17  421.58   17.52
  -3 -10 -16   19.88    3.96
   3 -10  16   20.08    2.82
   3 -10  15   75.48    4.70
  -3 -10 -15   77.96    6.15
   3 -10  14  127.48    6.44
  -3 -10 -14  126.11    8.30
   3 -10  13  162.11    7.55
  -3 -10 -13  140.98    9.13
  -3 -10 -12   26.92    5.01
   3 -10  12   31.41    3.46
   3 -10  11  143.91    7.30
  -3 -10 -11  147.91    9.28
   3 -10  10  116.00    6.40
  -3 -10 -10  112.29    8.15
   3 -10   9    8.90    3.00
   3 -10   9    8.64    1.50
  -3 -10  -9    6.03    4.21
  -3 -10  -8   33.21    3.68
   3 -10   8   33.63    2.37
   3 -10   8   33.61    3.90
  -3 -10  -8   39.82    5.63
   3 -10   7   23.02    3.59
  -3 -10  -7   18.71    3.28
   3 -10   7   23.66    2.06
  -3 -10  -7   29.55    5.51
  -3 -10  -6  130.06    7.28
   3 -10   6  123.48    5.48
   3 -10   6  123.90    6.89
  -3 -10  -6  126.29    8.78
   3 -10   5   10.25    3.40
  -3 -10  -5   11.42    3.23
   3 -10   5    7.48    1.64
  -3 -10  -5    8.27    4.58
  -3 -10  -4  148.11    7.90
   3 -10   4  129.26    5.80
   3 -10   4  131.17    7.29
   3 -10   3   22.19    3.79
  -3 -10  -3   19.37    3.71
   3 -10   3   25.03    2.33
  -3 -10  -2   30.58    4.04
   3 -10   2   37.97    2.75
   3 -10   2   34.83    4.17
  -3 -10  -1  185.25    9.17
   3 -10   1  160.34    6.94
   3 -10   1  156.65    8.30
   3 -10   0    4.06    3.45
  -3 -10   0    1.11    3.22
   3 -10   0    6.35    1.92
   3 -10  -1  165.78    7.45
   3 -10  -1  152.01    6.75
   3 -10  -1  151.29    8.23
   3 -10  -2   20.11    2.65
   3 -10  -2   30.37    2.72
   3 -10  -3   18.92    2.70
   3 -10  -3   25.35    2.64
   3 -10  -4  152.29    7.30
   3 -10  -4  131.67    6.31
   3 -10  -5    8.04    2.46
   3 -10  -6  144.14    7.31
   3 -10  -6  125.88    7.64
   3 -10  -7   25.11    3.31
   3 -10  -7   23.97    4.11
   3 -10  -8   31.16    3.62
   3 -10  -8   33.31    4.45
   3 -10  -9   10.36    3.10
   3 -10  -9    8.45    3.77
   3 -10 -10  104.66    6.27
   3 -10 -10   99.04    6.60
   3 -10 -11  138.66    7.58
   3 -10 -11  139.82    7.86
   3 -10 -12   41.41    4.22
   3 -10 -13  176.70    8.85
   3 -10 -14  128.82    7.22
   3 -10 -15   80.97    5.83
   3 -10 -16   18.68    3.43
   3 -10 -17  444.17   17.63
   3 -10 -18   35.07    3.94
   3 -10 -19   38.52    4.13
   3  10  21   15.57    3.63
   3  10  22   17.78    3.64
   3  10  23   14.55    3.36
   3 -10 -24  128.89    6.50
   3  10  24  142.60    6.96
   3 -10 -25   30.74    2.92
   3  10  25   31.39    3.37
   3 -10 -26   16.27    2.22
   3  10  26   12.11    2.60
   3 -10 -27    3.28    1.60
   3 -10 -28   19.21    1.78
  -3 -10  28    8.85    1.31
   3 -10 -29   41.82    2.37
   3 -10 -30   34.74    1.82
  -3  11  25   92.00    4.05
  -3  11  24   86.32    4.12
  -3  11  23   11.08    1.77
  -3  11  22   15.71    2.23
  -3  11  21   55.83    3.73
   3 -11  20   32.27    2.27
   3 -11  19   56.19    3.24
   3 -11  18  187.63    7.56
  -3 -11 -18  169.49    8.21
   3 -11  17  119.60    5.63
  -3 -11 -17  117.74    6.52
   3 -11  16   33.71    2.94
  -3 -11 -16   31.23    3.78
   3 -11  15   36.40    3.19
  -3 -11 -15   34.75    4.28
   3 -11  14   48.17    3.69
  -3 -11 -14   43.65    4.80
   3 -11  13   13.13    2.77
  -3 -11 -13   15.63    3.97
   3 -11  12   -0.19    2.47
  -3 -11 -12   -1.81    3.89
   3 -11  11    7.11    2.77
  -3 -11 -11    7.64    4.01
   3 -11  10  167.69    7.85
  -3 -11 -10  159.00    9.61
   3 -11   9  122.78    6.60
  -3 -11  -9  124.43    8.39
  -3 -11  -8   87.31    5.31
   3 -11   8   87.73    5.53
  -3 -11  -8   88.15    7.31
  -3 -11  -7   54.84    4.32
   3 -11   7   59.43    4.77
  -3 -11  -7   60.77    6.59
  -3 -11  -6    7.06    2.86
   3 -11   6    6.98    3.48
  -3 -11  -6   10.50    4.58
  -3 -11  -5   21.99    3.53
   3 -11   5   18.11    3.74
  -3 -11  -5   21.74    5.24
  -3 -11  -4   46.43    4.38
   3 -11   4   47.62    4.80
  -3 -11  -4   53.68    6.42
  -3 -11  -3   43.50    4.56
   3 -11   3   47.51    4.82
  -3 -11  -3   50.34    6.18
  -3 -11  -2   64.72    5.13
   3 -11   2   56.04    5.27
  -3 -11  -1   48.41    4.89
   3 -11   1   49.13    4.95
  -3 -11   0  155.62    8.38
   3 -11   0  135.77    8.07
  -3 -11   1   47.41    5.11
   3 -11  -1   56.74    5.33
  -3 -11   2   54.41    5.22
   3 -11  -2   49.96    3.40
   3 -11  -2   46.26    5.07
  -3 -11   3   39.71    4.96
   3 -11  -3   42.94    3.31
  -3 -11   4   54.97    5.34
   3 -11  -4   52.71    3.74
   3 -11  -5   18.28    2.50
  -3 -11   5   19.86    4.25
   3 -11  -6    5.09    2.18
  -3 -11   6    4.59    3.92
   3 -11  -7   58.41    4.17
   3 -11  -7   54.91    5.22
   3 -11  -8   91.61    5.35
   3 -11  -8   76.58    5.93
   3 -11  -9  132.28    6.88
   3 -11 -10  180.99    8.55
   3 -11 -11    8.19    2.72
   3 -11 -12    2.12    2.48
   3 -11 -13   13.56    3.06
   3 -11 -14   51.35    4.14
   3 -11 -15   36.73    3.58
   3 -11 -16   49.36    3.97
   3 -11 -17  126.00    6.49
   3 -11 -18  205.93    8.79
   3  11  18  185.96    8.70
   3 -11 -19   66.55    4.31
   3  11  19   63.09    4.41
   3 -11 -20   33.39    3.11
   3  11  20   31.15    3.22
   3  11  21   54.57    3.88
  -3 -11  22   23.18    2.79
   3  11  22   20.84    2.62
  -3 -11  23   11.37    2.20
   3  11  23    9.95    2.16
  -3 -11  24   86.86    4.56
   3  11  24   99.84    4.65
   3 -11 -25  111.12    4.55
   3  11  25  108.89    4.48
  -3 -11  25   72.96    4.17
   3  11  26    9.13    1.26
   3 -11 -26   11.16    1.32
   3 -11 -27    7.35    0.89
  -3  12  19    7.10    0.96
  -3  12  18   60.89    3.01
  -3 -12 -17  143.34    5.91
  -3  12  17   97.30    5.00
   3 -12  17  138.11    5.28
   3 -12  16   10.00    1.67
  -3 -12 -16    6.06    2.11
  -3  12  16    8.25    1.44
   3 -12  15   96.59    4.71
  -3 -12 -15   95.03    5.54
   3 -12  14   57.58    3.57
  -3 -12 -14   51.95    4.38
   3 -12  13   23.06    2.66
  -3 -12 -13   20.52    3.67
   3 -12  12   84.38    4.76
  -3 -12 -12   80.59    5.86
   3 -12  11  268.20   10.93
  -3 -12 -11  267.01   12.30
   3 -12  10   83.66    4.99
  -3 -12 -10   79.58    6.24
   3 -12   9   42.75    3.83
  -3 -12  -9   38.90    5.16
  -3 -12  -8   59.37    3.84
   3 -12   8   64.18    4.59
  -3 -12  -8   70.09    6.01
  -3 -12  -7   36.74    3.19
   3 -12   7   37.46    3.81
  -3 -12  -7   34.05    5.01
  -3 -12  -6   24.05    2.88
   3 -12   6   23.66    3.53
  -3 -12  -6   25.01    4.88
  -3 -12  -5   27.04    3.05
   3 -12   5   23.77    3.64
  -3 -12  -5   27.78    4.98
  -3 -12  -4    7.91    2.62
   3 -12   4    7.27    3.35
  -3 -12  -4    8.06    4.23
  -3 -12  -3   33.72    3.63
   3 -12   3   32.71    4.13
  -3 -12  -3   31.64    5.10
  -3 -12  -2   56.60    4.55
   3 -12   2   55.76    4.82
  -3 -12  -2   58.82    6.14
  -3 -12  -1   63.99    5.01
   3 -12   1   63.13    5.06
  -3 -12  -1   61.03    6.42
  -3 -12   0    0.34    2.96
   3 -12   0    0.41    3.54
  -3 -12   0    2.18    4.14
  -3 -12   1   64.20    5.08
  -3 -12   1   62.56    6.53
   3 -12  -1   56.18    5.18
  -3 -12   2   54.09    4.77
   3 -12  -2   54.97    5.01
  -3 -12   3   30.90    4.12
   3 -12  -3   23.28    2.04
   3 -12  -3   21.52    4.08
   3 -12  -4    6.86    1.50
  -3 -12   4    6.51    3.33
   3 -12  -4    9.09    3.82
  -3 -12   5   18.61    3.72
   3 -12  -5   22.54    2.24
  -3 -12   6   23.39    4.19
   3 -12  -6   23.38    2.33
   3 -12  -7   38.67    3.04
  -3 -12   7   37.09    4.39
   3 -12  -8   56.40    3.64
  -3 -12   8   59.25    5.12
   3 -12  -9   35.33    2.93
  -3 -12   9   30.39    4.25
   3 -12 -10   81.37    4.54
  -3 -12  10   82.70    5.81
  -3 -12  11  290.85   12.64
   3 -12 -11  288.39   11.52
  -3 -12  12   76.56    5.42
   3 -12 -12   80.97    4.30
   3  12  12   59.00    3.43
  -3 -12  13   21.09    3.65
   3 -12 -13   21.76    2.62
   3  12  13   17.05    1.88
  -3 -12  14   63.14    4.82
   3 -12 -14   60.90    3.74
   3  12  14   52.46    3.21
  -3 -12  15   84.86    5.29
   3 -12 -15   87.56    4.51
   3  12  15   74.76    4.00
   3 -12 -16   14.09    2.19
  -3 -12  16   15.79    3.07
   3  12  16    9.82    1.69
   3 -12 -17  163.02    6.61
   3  12  17  137.35    6.13
   3  12  18   91.60    4.46
   3 -12 -18  113.79    4.97
   3 -12 -19   19.52    2.03
   3  12  19   13.72    1.59
   3 -12 -20   19.30    1.84
  -3 -12  20   15.39    2.23
   3  12  20   14.88    1.53
  -3 -12  21   38.54    2.74
   3 -12 -21   49.33    2.61
   3  12  21   36.18    2.13
   3 -12 -22    1.46    0.93
  -3 -12  22    0.82    1.06
   3 -12 -23   17.25    1.35
  -3 -13 -15   18.19    1.65
  -3 -13 -14   61.68    3.49
  -3 -13 -13    2.37    1.76
  -3 -13 -12   42.55    3.29
  -3 -13 -11   19.54    2.73
   3 -13  11   20.19    2.17
  -3 -13 -10   39.69    3.81
   3 -13  10   41.47    3.00
  -3 -13  -9   29.86    3.72
   3 -13   9   30.30    2.82
  -3 -13  -8   30.23    3.74
   3 -13   8   31.32    2.96
  -3 -13  -7   16.17    1.72
   3 -13   7   18.14    2.70
  -3 -13  -7   15.29    3.36
   3 -13   6   19.70    2.83
  -3 -13  -6   21.03    2.07
  -3 -13  -6   19.07    3.84
  -3 -13  -5   20.23    2.30
  -3 -13  -5   29.64    4.16
   3 -13   5   27.72    3.11
  -3 -13  -4  135.90    6.15
  -3 -13  -4  129.56    7.60
   3 -13   4  129.18    6.51
  -3 -13  -3   55.15    3.65
  -3 -13  -3   49.23    4.99
   3 -13   3   48.98    4.02
  -3 -13  -2    7.83    2.22
  -3 -13  -2    9.52    3.73
  -3 -13  -1   13.00    2.54
  -3 -13  -1   14.48    3.99
  -3 -13   0   13.03    2.62
  -3 -13   0    6.27    3.66
  -3 -13   1   13.32    2.86
  -3 -13   1   11.83    3.70
  -3 -13   2   11.23    2.64
  -3 -13   2   11.31    3.75
  -3 -13   3   54.08    4.13
  -3 -13   3   52.29    5.26
  -3 -13   4  136.21    6.77
  -3 -13   4  120.41    7.62
  -3 -13   5   23.95    3.26
  -3 -13   5   32.12    4.45
  -3 -13   6   18.74    3.00
  -3 -13   6   14.54    3.67
   3 -13  -7   14.12    1.36
  -3 -13   7   22.03    3.03
  -3 -13   7   17.23    3.83
   3 -13  -8   25.65    1.85
  -3 -13   8   29.74    3.30
  -3 -13   8   33.10    4.20
   3 -13  -9   25.26    1.87
  -3 -13   9   34.12    3.36
  -3 -13   9   29.39    4.01
  -3 -13  10   52.27    3.90
   3 -13 -10   36.06    2.33
  -3 -13  11   20.09    2.82
   3 -13 -11   11.41    1.37
  -3 -13  12   42.99    3.41
   3 -13 -12   36.41    2.28
   3 -13 -13    1.86    1.08
  -3 -13  13    0.99    2.07
   3 -13 -14   56.94    2.92
  -3 -13  14   65.57    3.90
   3 -13 -15   20.76    1.58
  -3 -13  15   17.97    2.32
   3 -13 -16   52.07    2.56
   3 -13 -17  105.54    4.29
  -3 -13  18    8.67    1.27
  -3 -13  18    8.25    1.51
  -3 -14 -10    8.63    1.16
  -3 -14  -9    8.51    1.41
  -3 -14  -8    6.74    1.53
  -3 -14  -7   72.05    3.97
  -3 -14  -6   19.22    2.29
  -3 -14  -5   14.59    2.33
  -3 -14  -4   13.56    1.16
  -3 -14  -4   18.79    2.43
  -3 -14  -3    3.15    0.91
  -3 -14  -3    3.62    2.14
  -3 -14  -2   28.90    1.97
  -3 -14  -2   30.67    3.06
  -3 -14  -1   37.76    2.34
  -3 -14  -1   38.58    3.44
  -3 -14   0   30.21    2.17
  -3 -14   0   34.24    3.33
  -3 -14   1   38.52    2.48
  -3 -14   1   35.22    3.38
  -3 -14   2   30.10    2.26
  -3 -14   2   31.98    3.31
  -3 -14   3    3.79    1.43
  -3 -14   3    1.70    2.16
  -3 -14   4   17.74    1.89
  -3 -14   4   17.15    2.71
  -3 -14   5   18.21    1.87
  -3 -14   5   17.04    2.56
  -3 -14   6   20.23    2.05
  -3 -14   6   19.06    2.65
  -3 -14   7   86.47    4.13
  -3 -14   7   78.43    4.61
  -3 -14   8    8.38    1.44
  -3 -14   8    8.53    1.97
  -3 -14   9   10.11    1.56
  -3 -14   9    8.67    1.94
  -3 -14  10   10.16    1.38
  -3 -14  10    8.37    1.77
  -3 -14  11   19.89    1.62
  -3 -14  11   19.06    1.92
  -3 -14  12    2.56    0.86
   4   0   0  389.38   14.87
   4   0   1  131.43    6.28
   4   0   2   30.55    2.92
   4   0   3   75.20    4.64
   4   0   4  796.86   29.23
   4   0  -4  775.14   28.74
   4   0   4  862.72   29.96
   4   0   5  150.49    7.09
   4   0  -5  125.84    6.22
   4   0   5  122.96    7.09
   4   0   6   25.88    3.20
   4   0   6   15.67    3.08
   4   0  -6   19.03    2.33
   4   0   7    0.06    2.44
   4   0   7    1.58    2.55
   4   0  -7    0.99    1.53
   4   0   8  172.18    8.27
   4   0   8  150.57    8.29
   4   0  -8  157.02    6.81
   4   0   9   51.73    4.62
   4   0   9   60.01    4.92
   4   0  -9   52.94    3.14
   4   0  10  920.08   32.69
   4   0  10  893.37   32.98
   4   0 -10  869.45   30.73
   4   0  11    0.67    3.09
   4   0  11   -0.17    3.10
   4   0  12  458.91   18.48
   4   0  12  455.12   18.96
   4   0  13   32.10    4.23
   4   0  13   16.12    3.95
   4   0  14   85.80    6.55
   4   0  14  120.04    7.50
   4   0  15   97.23    6.53
   4   0  15   59.25    5.91
   4   0  16  110.51    7.59
   4   0  16  140.75    8.29
   4   0  17   22.18    4.60
   4   0  18  508.06   20.99
   4   0  19   47.34    5.78
   4   0  20  794.21   30.35
   4   0  20  825.69   31.10
   4   0  21    2.46    3.96
   4   0  21    3.41    3.93
   4   0  22    4.55    4.12
   4   0  22    3.08    4.19
   4   0  23    9.29    4.35
   4   0  23   12.27    4.45
   4   0  24   75.73    6.08
   4   0  24   63.40    6.23
   4   0  25    2.25    4.12
   4   0  25    2.47    4.35
   4   0  26  298.16   11.73
   4   0  26  205.21   11.62
   4   0  27    6.93    3.56
   4   0  28   33.53    3.98
   4   0  29   70.07    4.77
   4   0  30   20.55    2.95
   4   0  31   22.42    2.66
   4   0  32   46.54    3.12
   4   0  33  131.76    5.57
   4   0  34  431.08   15.23
   4   0  35   12.96    0.98
   4  -1  36   11.43    1.06
   4  -1  35    5.75    1.31
   4  -1  34   27.16    2.37
   4  -1  34   22.53    1.52
   4  -1  33   29.41    2.97
   4  -1  33   33.44    2.21
   4  -1  32    5.66    1.74
   4  -1  32    4.30    2.50
   4  -1  31   24.83    3.47
   4  -1  31   28.37    2.66
   4  -1  30   30.18    3.79
   4  -1  30   31.25    3.08
   4  -1  29   20.91    3.06
   4  -1  29   26.05    3.84
   4  -1  28   22.88    3.42
   4  -1  28   17.26    4.12
   4  -1  27    3.17    3.13
   4  -1  27    3.22    3.98
   4  -1  26    3.83    3.43
   4  -1  25   20.41    4.17
   4  -1  24   92.43    6.53
   4  -1  23   24.80    4.73
   4  -1  22   15.98    4.47
   4  -1  21  158.82    8.86
   4  -1  20   74.21    6.18
   4  -1  19  151.48    8.58
   4  -1  18  126.25    8.25
   4  -1  17  155.33    9.09
   4  -1  16  943.14   35.61
   4  -1  15  463.02   19.51
   4  -1  14   29.18    4.40
   4  -1  14   13.23    4.00
   4  -1  13  576.23   24.13
   4  -1  13  714.08   25.28
   4  -1  12  549.34   21.26
   4  -1  12  527.41   21.61
   4  -1  11   78.40    5.94
   4  -1  11  125.51    7.30
   4  -1  10  179.47    8.86
   4  -1  10  167.42    9.29
   4  -1   9  203.17    9.98
   4  -1   9  229.70   10.72
   4  -1   8  106.49    6.24
   4  -1   8   97.05    6.41
   4  -1   7   27.95    3.49
   4  -1   7   37.46    4.24
   4  -1   6   37.98    3.71
   4   1  -6   37.33    2.74
   4  -1   6   38.24    4.16
   4   1  -5   73.68    4.15
   4  -1   5   83.62    5.66
   4  -1   5   74.26    4.85
   4  -1   4   76.01    4.75
   4  -1   3    4.69    1.98
   4  -1   2  210.85    9.14
   4  -1   1    4.71    1.73
   4  -1   0    1.77    1.50
   4   1   1    5.59    1.64
   4  -1  -1    4.98    1.54
   4   1   2  196.28    8.69
   4  -1  -2  200.34    8.23
   4   1   3    8.95    2.13
   4  -1  -3   10.99    2.48
   4   1   4   79.90    4.83
   4  -1  -4   73.84    4.57
   4   1   5   76.47    4.86
   4  -1  -5   71.32    4.44
   4   1   5   74.24    5.01
   4   1   6   38.71    3.73
   4  -1  -6   41.13    3.19
   4   1   6   39.37    3.80
   4  -1  -7   21.92    2.83
   4   1   7   24.26    3.30
   4  -1  -7   31.06    2.68
   4   1   7   38.17    3.67
   4  -1  -8   98.89    5.63
   4   1   8   97.63    6.05
   4   1   8   96.42    6.02
   4  -1  -8   95.20    4.87
   4  -1  -9  190.34    9.39
   4   1   9  202.34    9.90
   4   1   9  232.76   10.25
   4  -1  -9  211.01    8.50
   4  -1 -10  187.46    8.80
   4   1  10  188.35    9.23
   4   1  10  177.95    9.16
   4  -1 -10  175.59    7.41
   4  -1 -11   70.27    5.32
   4   1  11   80.69    6.02
   4  -1 -11   97.71    4.43
   4  -1 -12  542.10   20.39
   4   1  12  549.04   20.77
   4   1  12  470.56   20.41
   4  -1 -12  511.19   18.41
   4  -1 -13  573.31   23.13
   4   1  13  592.90   23.60
   4  -1 -13  601.60   21.44
   4   1  14   29.17    4.39
   4  -1 -14   33.65    3.69
   4  -1 -14   23.43    1.90
   4   1  14   12.28    3.81
   4  -1 -15  478.26   19.00
   4   1  15  486.66   19.40
   4   1  15  445.40   19.25
   4  -1 -16  837.92   31.91
   4   1  16  798.27   32.14
   4  -1 -17  154.58    8.40
   4   1  17  148.05    8.74
   4   1  17  152.96    8.95
   4  -1 -18  131.89    7.76
   4   1  18  138.69    8.39
   4  -1 -19  150.88    8.32
   4   1  19  144.29    8.76
   4  -1 -20   79.88    5.98
   4   1  20   78.92    6.34
   4  -1 -21  122.11    7.61
   4   1  21  136.20    8.07
   4   1  22   15.96    4.71
   4   1  22   22.15    4.48
   4   1  23   29.33    5.07
   4   1  23   14.21    4.26
   4   1  24   77.42    6.51
   4   1  24   82.04    6.36
   4   1  25   19.46    4.53
   4   1  25   20.47    4.42
   4   1  26    0.52    3.79
   4   1  26    4.90    3.57
   4   1  27    4.45    3.52
   4   1  27    5.32    3.56
   4   1  28   20.19    3.67
   4   1  28   17.86    3.85
   4   1  29   20.24    3.33
   4   1  29   26.29    3.73
   4   1  30   34.49    3.45
   4   1  30   29.32    3.80
   4   1  31   26.34    2.97
   4   1  31   27.68    3.44
   4   1  32    5.07    2.05
   4   1  32    3.47    2.19
   4   1  33   28.27    2.84
   4   1  33   32.08    2.39
   4   1  34   29.17    2.39
   4   1  34   29.86    1.98
   4   1  35    6.09    0.82
   4   1  35    4.24    1.12
   4  -2  35    5.26    1.07
   4  -2  34   34.19    2.51
   4  -2  34   36.59    1.75
   4  -2  33   88.68    4.75
   4  -2  33   99.03    4.05
   4  -2  32   47.33    3.70
   4  -2  32   54.75    2.92
   4  -2  31  151.81    7.53
   4  -2  31  166.21    6.77
   4  -2  30   74.21    5.26
   4  -2  30   87.23    4.50
   4  -2  29   69.29    5.52
   4  -2  29   91.38    4.81
   4  -2  28   52.29    5.08
   4  -2  28   66.53    4.26
  -4   2  28   52.98    3.55
   4  -2  27   50.26    5.24
   4  -2  27   53.27    4.26
  -4   2  27   45.43    3.49
   4  -2  26   37.07    4.91
   4  -2  26   33.69    3.95
   4  -2  25  154.54    9.22
   4  -2  25  183.79    8.56
   4  -2  24   20.05    3.98
   4  -2  24   19.95    4.85
   4  -2  23   31.17    4.45
   4  -2  23   26.23    5.29
   4  -2  22  147.64    8.13
   4  -2  22  139.48    9.02
   4  -2  21  167.62    8.74
   4  -2  21  144.99    9.48
   4  -2  20   57.03    5.45
   4  -2  20   63.70    6.37
   4  -2  19    5.32    4.05
   4  -2  19    2.69    4.15
   4  -2  18  260.29   12.10
   4  -2  17  251.56   11.72
   4  -2  13  414.64   16.94
   4  -2  12  302.73   13.27
   4  -2  11  345.98   14.55
   4  -2  10  155.80    8.00
   4  -2  10  137.02    8.42
   4  -2   9  228.91   11.01
   4  -2   9  225.97   10.41
   4  -2   8   63.67    5.40
   4  -2   8   60.24    4.69
   4  -2   7  154.92    8.39
   4  -2   7  147.62    7.65
   4  -2   6  478.75   18.86
   4  -2   6  451.47   17.95
   4  -2   5  373.02   14.92
   4  -2   4   11.29    2.47
   4  -2   3  367.16   14.50
   4  -2   2  242.34   10.19
   4  -2   1  290.30   11.70
   4  -2   0   56.84    3.65
   4  -2  -1  282.64   11.18
   4   2   2  258.00   10.67
   4  -2  -2  253.26   10.96
   4  -2  -2  265.34   10.36
   4   2   3  352.09   13.87
   4  -2  -3  313.21   13.73
   4  -2  -3  374.78   13.31
   4   2   4   12.81    2.39
   4  -2  -4    7.10    2.45
   4  -2  -4   13.21    1.63
   4  -2  -5  382.79   15.18
   4   2   5  414.13   15.66
   4  -2  -5  369.80   14.97
   4   2   5  394.28   15.45
   4  -2  -6  414.58   17.25
   4   2   6  444.87   17.70
   4  -2  -6  465.25   17.06
   4   2   6  479.24   17.72
   4  -2  -7  149.61    7.53
   4   2   7  155.99    7.98
   4  -2  -7  158.31    7.14
   4   2   7  165.46    7.91
   4  -2  -8   75.26    4.83
   4   2   8   76.30    5.29
   4   2   8   67.79    4.90
   4  -2  -8   75.90    4.27
   4  -2  -9  177.82    8.59
   4   2   9  179.49    9.01
   4   2   9  184.98    8.86
   4  -2  -9  184.26    7.71
   4  -2 -10  141.35    7.22
   4   2  10  137.25    7.65
   4   2  10  129.94    7.26
   4  -2 -10  130.96    6.01
   4  -2 -11  348.48   14.89
   4   2  11  352.49   15.30
   4   2  11  374.90   15.26
   4  -2 -11  370.61   13.60
   4  -2 -12  299.98   12.85
   4   2  12  309.86   13.43
   4   2  12  286.90   12.96
   4  -2 -12  294.18   11.28
   4  -2 -13  480.07   18.61
   4   2  13  479.60   19.02
   4   2  13  463.59   18.76
   4  -2 -13  452.69   16.79
   4   2  14   20.19    4.27
   4  -2 -14   21.66    3.42
   4   2  14   26.69    3.62
   4  -2 -14   23.86    2.10
   4  -2 -15  234.22   11.25
   4   2  15  238.51   11.71
   4   2  15  270.51   11.83
   4  -2 -15  242.20    9.44
   4  -2 -16  459.18   17.86
   4   2  16  459.87   18.27
   4   2  16  435.35   17.93
   4  -2 -16  413.39   15.66
   4  -2 -17  275.75   11.90
   4   2  17  278.41   12.32
   4  -2 -18  226.19   11.36
   4   2  18  241.51   12.01
   4   2  18  280.64   12.12
   4  -2 -19    6.79    3.49
   4   2  19    7.99    3.47
   4  -2 -20   72.99    5.79
   4   2  20   77.36    6.10
   4  -2 -21  177.63    8.88
   4   2  21  142.35    8.56
   4   2  22  120.75    7.62
   4   2  23   38.39    5.26
   4   2  23   25.81    4.39
   4   2  24   14.04    4.64
   4   2  24   17.24    3.87
   4   2  25  167.51    8.74
   4   2  25  138.58    8.11
   4   2  26   26.44    4.65
   4   2  26   29.41    4.15
   4   2  27   52.98    5.03
   4   2  27   42.73    4.43
   4   2  28   60.21    4.92
   4   2  28   53.69    4.55
   4   2  29   77.50    5.03
   4   2  29   64.65    4.85
   4   2  30   78.33    4.80
   4   2  30   66.76    4.71
   4   2  31  184.88    7.73
   4   2  31  161.74    7.64
   4   2  32   58.86    3.58
   4   2  32   51.97    3.54
   4   2  33  110.75    4.71
   4   2  33   89.99    4.67
   4   2  34   33.42    2.42
   4   2  34   54.31    2.57
   4   2  35    6.07    0.91
   4   2  35   10.41    0.93
   4  -3  33    3.46    0.71
   4  -3  33    5.21    1.57
   4  -3  32    6.53    1.15
   4  -3  32    6.52    1.95
   4  -3  31   44.00    3.56
   4  -3  31   50.85    2.84
   4  -3  30    6.99    1.74
   4  -3  30   10.75    2.72
  -4   3  30    7.55    1.62
   4  -3  29   26.57    3.69
   4  -3  29   26.01    2.60
  -4   3  29   20.85    2.43
   4  -3  28   18.14    3.67
   4  -3  28   24.13    2.83
  -4   3  28   23.53    2.75
   4  -3  27   51.37    5.08
   4  -3  27   59.99    4.03
   4  -3  26  111.56    6.78
   4  -3  26  105.72    5.89
   4  -3  25  103.69    7.18
   4  -3  25  111.44    6.14
   4  -3  24   13.92    3.44
   4  -3  24   15.54    4.72
   4  -3  23    1.68    3.27
   4  -3  23    1.44    4.74
   4  -3  22   15.34    3.90
   4  -3  22   14.38    4.87
   4  -3  21    0.83    3.55
   4  -3  21    0.51    4.47
   4  -3  20    1.24    3.75
   4  -3  20    1.58    4.31
   4  -3  19   10.23    3.83
   4  -3  19   10.18    4.46
   4  -3  18   64.72    6.11
   4  -3  18   59.52    5.37
   4  -3  17    5.37    3.74
   4  -3  17    2.00    4.21
   4  -3  16   94.84    7.32
   4  -3  16  102.61    6.59
   4  -3  15  100.68    7.13
   4  -3  15   67.86    5.75
   4  -3  14  114.25    7.75
   4  -3  13  127.72    8.10
   4  -3  12   54.48    5.65
   4  -3  11   31.79    4.75
   4  -3  11   41.75    4.34
   4  -3  10   30.34    3.95
   4  -3   9   80.53    5.45
   4  -3   8   79.62    5.33
   4  -3   7   19.43    3.16
   4  -3   6  217.60    9.81
   4  -3   5  155.59    7.59
   4  -3   4  495.42   18.88
   4  -3   3   91.88    5.23
   4  -3   2   86.13    4.93
   4  -3   1   10.70    2.15
   4  -3   0  321.01   13.45
   4  -3   0  335.82   12.96
   4  -3  -1   12.68    2.03
   4  -3  -1   18.77    3.19
   4  -3  -2  102.45    5.77
   4  -3  -2   91.32    4.78
   4   3   3   90.76    5.16
   4  -3  -3  104.21    5.69
   4  -3  -3   93.86    4.74
   4   3   4  498.20   18.81
   4  -3  -4  482.69   18.59
   4  -3  -4  495.14   18.01
   4  -3  -5  134.78    6.91
   4   3   5  143.62    7.26
   4  -3  -5  159.09    7.17
   4  -3  -5  149.59    6.38
   4  -3  -6  200.52    9.28
   4   3   6  208.63    9.66
   4  -3  -6  220.73    9.12
   4  -3  -6  213.37    8.53
   4   3   7   20.10    3.05
   4  -3  -7   15.37    2.47
   4   3   7   13.61    2.20
   4  -3  -7   15.96    2.62
   4  -3  -8   82.84    5.17
   4   3   8   80.98    5.54
   4  -3  -8   85.23    4.65
   4   3   8   86.91    5.08
   4  -3  -9   82.31    5.22
   4   3   9   87.14    5.76
   4   3   9   76.93    4.95
   4  -3  -9   85.24    4.50
   4  -3 -10   28.36    3.34
   4   3  10   33.07    4.13
   4   3  10   41.80    3.56
   4  -3 -10   40.32    2.95
   4  -3 -11   37.35    3.70
   4   3  11   40.48    4.51
   4   3  11   36.74    3.60
   4  -3 -11   39.97    2.89
   4  -3 -12   51.16    4.46
   4   3  12   53.99    5.07
   4   3  12   55.73    4.33
   4  -3 -12   52.96    3.27
   4  -3 -13  113.58    6.78
   4   3  13  122.03    7.49
   4   3  13  124.44    6.82
   4  -3 -13  120.18    5.50
   4  -3 -14  131.72    7.27
   4   3  14  132.91    7.81
   4   3  14  111.96    6.72
   4  -3 -14  119.86    5.52
   4  -3 -15   81.16    5.65
   4   3  15   81.10    6.51
   4   3  15  100.67    6.03
   4  -3 -15   90.10    4.47
   4  -3 -16  105.82    6.44
   4   3  16  106.36    7.04
   4   3  16   88.40    5.93
   4  -3 -16   87.96    4.51
   4   3  17    5.52    3.81
   4  -3 -17    3.10    2.95
   4   3  17    2.90    2.91
   4  -3 -18   52.25    4.99
   4   3  18   57.00    5.80
   4   3  18   58.94    4.95
   4  -3 -19    6.81    3.36
   4   3  19   10.94    4.55
   4   3  19    9.94    3.22
   4   3  20   -1.15    4.37
   4  -3 -20    0.61    3.11
   4   3  20    1.91    2.87
   4  -3 -21    1.13    3.29
   4   3  21    0.30    2.87
   4  -3 -22   11.53    3.67
   4   3  22   13.80    3.44
   4   3  23    3.82    2.83
   4   3  24   18.89    3.42
   4   3  25  105.71    6.98
   4   3  25   95.90    6.14
   4  -3 -26   83.72    6.13
   4   3  26  107.41    6.61
   4   3  26  102.23    5.95
   4   3  27   56.66    5.07
   4   3  27   56.78    4.45
   4   3  28   25.05    3.82
   4   3  28   18.23    2.86
   4   3  29   26.07    3.64
   4   3  29   25.48    2.94
   4   3  30    9.07    2.79
   4   3  30    8.23    2.13
   4   3  31   50.90    3.51
   4   3  31   41.61    3.03
   4   3  32    7.32    2.04
   4   3  32    8.05    1.54
   4   3  33    5.50    1.50
   4   3  33    4.43    1.13
   4   3  34    7.03    1.15
   4  -4  32   21.11    1.28
  -4   4  32   19.56    1.48
   4  -4  31  158.04    6.74
   4  -4  31  160.51    6.01
  -4   4  31  145.20    6.31
   4  -4  30   17.22    2.57
   4  -4  30   17.19    1.56
   4  -4  30   29.11    2.02
  -4   4  30   24.60    2.28
   4  -4  29   47.65    3.85
  -4   4  29   48.91    3.52
   4  -4  29   55.48    3.11
   4  -4  28   81.92    5.21
  -4   4  28   83.64    4.87
   4  -4  28   91.84    4.52
   4  -4  27  131.35    7.50
   4  -4  27  167.85    6.97
   4  -4  26   91.73    5.87
   4  -4  26   89.95    4.97
   4  -4  25  127.49    7.59
   4  -4  25  148.82    6.87
   4  -4  24  128.44    7.48
   4  -4  24  133.06    6.69
   4  -4  23  112.70    7.11
   4  -4  23  105.84    6.10
   4  -4  22   10.98    3.48
   4  -4  22    7.45    4.03
   4  -4  21  144.20    8.24
   4  -4  21  121.28    6.98
   4  -4  20  209.02   11.15
   4  -4  20  247.38   10.59
   4  -4  19  311.80   13.90
   4  -4  19  296.26   12.88
   4  -4  18  125.49    7.90
   4  -4  18  119.56    7.14
   4  -4  17   31.26    4.95
   4  -4  17   37.30    4.35
   4  -4  16  124.98    8.09
   4  -4  16  132.51    7.35
   4  -4  15  369.55   16.04
   4  -4  15  361.68   15.07
   4  -4  14  145.90    8.61
   4  -4  14  133.65    7.57
   4  -4  13  105.49    7.46
   4  -4  12   15.85    4.16
   4  -4  11   25.47    4.45
   4  -4  10   66.74    5.61
   4  -4  10   69.03    5.16
   4  -4   9  754.73   27.85
   4  -4   8  291.78   12.37
   4  -4   7  762.94   27.96
   4  -4   6  459.31   17.78
   4  -4   5  273.89   11.52
   4  -4   4  306.35   12.52
   4  -4   3   27.13    2.97
   4  -4   2  157.43    7.35
   4  -4   1  277.76   11.28
   4  -4   0  138.02    6.53
   4  -4  -1  282.54   11.29
   4  -4  -2  126.74    6.87
   4  -4  -2  137.93    6.26
   4  -4  -3   34.70    3.77
   4  -4  -3   31.29    2.61
   4  -4  -4  264.68   11.60
   4  -4  -4  304.31   11.35
   4  -4  -5  203.27    9.26
   4   4   5  214.50    9.59
   4  -4  -5  230.11    9.41
   4  -4  -5  214.09    8.84
   4  -4  -6  475.00   18.32
   4   4   6  490.61   18.62
   4  -4  -6  454.47   17.80
   4  -4  -6  487.68   17.60
   4  -4  -7  727.95   27.34
   4   4   7  737.22   27.61
   4  -4  -7  781.73   26.75
   4  -4  -7  726.91   26.44
   4  -4  -8  264.17   11.50
   4   4   8  270.40   11.90
   4  -4  -8  279.73   10.86
   4  -4  -8  259.16   10.55
   4  -4  -9  795.89   28.99
   4   4   9  799.68   29.33
   4  -4  -9  768.43   27.85
   4  -4 -10   88.69    5.47
   4   4  10   90.61    6.02
   4  -4 -10   77.08    4.46
   4  -4 -11   39.51    3.78
   4   4  11   40.45    4.46
   4  -4 -11   36.56    2.90
   4   4  12   12.50    3.83
   4  -4 -12   12.08    2.09
   4  -4 -12   11.74    2.99
   4  -4 -13  127.07    6.82
   4   4  13  123.51    7.31
   4   4  13   91.48    5.65
   4  -4 -13  110.71    5.28
   4  -4 -14  163.24    8.20
   4   4  14  158.86    8.67
   4   4  14  140.92    7.24
   4  -4 -14  147.65    6.56
   4  -4 -15  351.91   14.77
   4   4  15  353.59   15.19
   4   4  15  345.39   14.04
   4  -4 -15  337.77   13.06
   4  -4 -16  116.43    6.86
   4   4  16  108.73    7.52
   4   4  16  108.59    6.12
   4  -4 -17   39.72    4.26
   4   4  17   41.12    5.21
   4   4  17   27.75    3.26
   4  -4 -18  132.29    7.45
   4   4  18  130.52    8.08
   4   4  18  117.57    6.63
   4  -4 -19  302.02   13.36
   4   4  19  306.37   13.83
   4   4  19  296.66   12.69
   4  -4 -20  257.59   11.02
   4   4  20  236.42   11.38
   4   4  20  201.21    9.91
   4  -4 -21  101.72    6.82
   4   4  21  102.99    7.17
   4   4  21  119.45    6.29
   4  -4 -22   15.69    3.75
   4   4  22   10.19    2.70
   4   4  23  109.15    6.07
   4   4  24  125.89    6.54
   4   4  25  128.39    6.49
   4   4  26   73.32    5.63
   4   4  26   76.90    4.58
   4  -4 -27  161.81    7.57
   4   4  27  170.99    7.90
   4   4  27  125.65    6.60
   4  -4 -28   92.87    5.43
   4   4  28   91.81    5.65
   4   4  28   85.59    4.64
   4   4  29   76.18    4.70
   4   4  29   58.40    3.55
   4   4  30   33.46    3.05
   4   4  30   17.19    1.84
   4   4  31  170.13    6.34
   4   4  31  114.67    5.24
   4   4  32   25.20    2.28
   4   4  33   21.42    1.80
   4   4  34   35.57    1.87
  -4   5  32   13.19    1.18
  -4   5  31   25.78    1.86
   4  -5  31   15.27    1.08
   4  -5  30   49.90    2.53
  -4   5  30   59.09    3.32
   4  -5  29    2.32    1.17
  -4   5  29    2.36    1.85
   4  -5  28   54.23    3.03
  -4   5  28   53.17    3.92
   4  -5  27   18.09    2.79
   4  -5  27   14.76    1.78
   4  -5  27   16.54    2.06
   4  -5  26   18.83    3.11
   4  -5  26   17.88    2.12
   4  -5  26   19.06    2.33
   4  -5  25   14.54    2.43
   4  -5  25   11.66    3.15
   4  -5  24   34.24    3.91
   4  -5  24   26.82    3.12
   4  -5  23   77.42    5.42
   4  -5  23   76.93    4.71
   4  -5  22  168.04    9.02
   4  -5  22  188.92    8.28
   4  -5  21   71.56    5.42
   4  -5  21   53.39    4.38
   4  -5  20   64.00    5.76
   4  -5  20   72.35    5.05
   4  -5  19   22.65    3.67
   4  -5  19   15.93    4.28
   4  -5  18    1.79    3.35
   4  -5  18    6.44    4.01
   4  -5  17  148.23    8.45
   4  -5  17  137.68    7.50
   4  -5  16  327.28   14.15
   4  -5  16  303.82   13.13
   4  -5  15  471.76   19.77
   4  -5  15  504.58   19.10
   4  -5  14  144.38    8.04
   4  -5  14  114.04    6.87
   4  -5  13   16.83    3.56
   4  -5  12   87.81    5.72
   4  -5   8  120.91    6.58
   4  -5   7   37.33    3.73
   4  -5   6  131.39    7.54
   4  -5   6  144.76    7.15
   4  -5   5    3.64    2.41
   4  -5   5    2.32    3.50
   4  -5   4  153.13    7.87
   4  -5   4  153.76    7.40
   4  -5   3  115.53    6.49
   4  -5   3   94.85    5.49
   4  -5   2   82.92    5.54
   4  -5   2   85.43    4.95
   4  -5   1   64.73    4.88
   4  -5   1   57.78    4.04
   4  -5   0   90.84    5.91
   4  -5   0  112.23    5.54
   4  -5  -1   60.83    3.92
   4  -5  -2   87.33    4.79
   4  -5  -3   92.29    4.95
   4  -5  -4  152.85    6.98
   4  -5  -5    4.74    1.82
   4  -5  -6  135.00    6.95
   4   5   6  152.90    7.33
   4  -5  -6  142.01    6.86
   4  -5  -6  147.68    6.69
   4  -5  -7   43.14    3.61
   4   5   7   40.25    3.83
   4  -5  -7   54.82    3.71
   4  -5  -7   41.94    3.20
   4  -5  -8  124.44    6.53
   4   5   8  121.76    6.71
   4  -5  -8  118.02    5.79
   4  -5  -8  110.51    5.67
   4   5   9   14.15    3.14
   4  -5  -9   12.19    2.03
   4  -5  -9   14.44    2.62
   4  -5  -9   15.35    2.51
   4  -5 -10  176.19    8.38
   4   5  10  168.00    8.68
   4  -5 -10  169.00    7.30
   4  -5 -10  160.55    7.34
   4  -5 -11  169.06    8.76
   4   5  11  174.56    9.22
   4  -5 -11  193.75    7.85
   4  -5 -12  109.12    6.47
   4   5  12  111.16    6.97
   4  -5 -12  107.81    5.31
   4   5  13   18.26    3.88
   4  -5 -13   18.59    2.50
   4  -5 -13   15.16    3.17
   4  -5 -14  107.03    6.67
   4   5  14  110.34    7.22
   4  -5 -14  120.05    5.61
   4  -5 -15  534.24   20.42
   4   5  15  496.90   20.73
   4  -5 -16  297.66   12.90
   4   5  16  286.91   13.40
   4  -5 -17  135.54    7.65
   4   5  17  136.79    8.23
   4   5  18    4.00    3.79
   4  -5 -18    3.09    3.18
   4   5  19   18.68    4.38
   4  -5 -19   20.88    3.54
   4  -5 -20   82.00    5.85
   4   5  20   78.08    6.24
   4  -5 -21   48.00    4.86
   4   5  21   52.33    5.53
   4   5  21   63.76    3.79
   4  -5 -22  197.47    8.83
   4   5  22  187.08    9.24
   4   5  22  141.79    7.01
   4  -5 -23   68.07    5.13
   4   5  23   61.03    5.60
   4   5  23   71.16    3.96
   4   5  24   31.11    2.49
   4   5  25    9.29    1.60
   4   5  26   11.72    1.56
   4  -5 -28   48.68    3.75
   4   5  28   49.03    4.10
   4   5  29    2.28    2.33
   4   5  30   62.55    3.85
   4   5  31   25.36    2.37
   4   5  32   19.47    1.80
   4   5  33   23.38    1.51
  -4   6  31   18.00    1.47
  -4   6  30   22.42    1.97
  -4   6  29   64.23    3.49
   4  -6  29   47.53    2.34
  -4   6  28  217.67    8.84
   4  -6  28  203.38    7.76
   4  -6  27   64.19    3.24
   4  -6  26  104.18    4.72
   4  -6  25   21.50    1.82
   4  -6  25   29.66    2.39
   4  -6  24  300.86   11.66
   4  -6  24  334.62   12.11
   4  -6  23   77.23    4.09
   4  -6  23   79.80    4.40
   4  -6  22   39.41    3.21
   4  -6  22   61.44    3.80
   4  -6  21  200.29    8.78
   4  -6  21  226.25    9.11
   4  -6  20  156.98    7.41
   4  -6  20  178.33    7.74
   4  -6  19   51.00    3.86
   4  -6  19   48.07    3.99
   4  -6  18  206.58    9.69
   4  -6  18  262.22   10.26
   4  -6  17  481.43   18.94
   4  -6  17  526.40   19.15
   4  -6  16   81.67    5.24
   4  -6  16   78.78    5.27
   4  -6  15    8.28    3.30
   4  -6  15    7.08    3.11
   4  -6  14  318.35   13.69
   4  -6  14  365.65   13.91
   4  -6  13   85.36    5.52
   4  -6  13   72.03    5.21
   4  -6  12  166.43    8.37
   4  -6  12  177.66    8.34
   4  -6  11    2.90    3.08
   4  -6  11    2.71    3.25
   4  -6  10  483.39   18.73
   4  -6   9  185.84    8.95
   4  -6   8   36.21    4.30
   4  -6   7  100.69    6.24
   4  -6   6   93.79    6.00
   4  -6   6  104.12    5.81
   4  -6   5   44.48    4.30
   4  -6   5   40.39    3.75
   4  -6   4  334.38   13.94
   4  -6   4  351.88   13.76
   4  -6   3   17.44    2.87
   4  -6   3   18.69    3.65
   4  -6   2  138.60    7.39
   4  -6   2  155.82    7.14
   4  -6   1   10.02    2.56
   4  -6   1   11.64    3.17
   4  -6   0   91.85    5.72
   4  -6   0  116.94    5.73
   4  -6  -1    9.55    2.42
   4  -6  -1   11.93    3.03
   4  -6  -2  157.10    7.62
   4  -6  -2  168.82    7.57
   4  -6  -3   18.45    2.72
   4  -6  -3   19.49    3.17
   4  -6  -4  303.76   12.90
   4  -6  -4  368.56   13.35
   4  -6  -5   41.81    3.39
   4  -6  -6   84.58    4.98
   4  -6  -6   89.52    5.00
   4  -6  -7   96.66    5.48
   4   6   7  102.63    5.71
   4  -6  -7   95.03    5.30
   4  -6  -8   40.45    3.55
   4   6   8   34.26    3.52
   4  -6  -8   33.65    3.07
   4  -6  -9  208.15    9.13
   4   6   9  205.27    9.27
   4  -6  -9  177.22    8.10
   4  -6  -9  184.02    8.36
   4  -6 -10  493.73   18.99
   4   6  10  486.11   19.20
   4  -6 -10  484.65   17.88
   4  -6 -10  479.60   18.25
   4   6  11    4.79    2.88
   4  -6 -11    3.36    1.81
   4  -6 -11    3.65    2.50
   4  -6 -11    5.38    2.33
   4  -6 -12  197.19    9.02
   4   6  12  179.51    9.25
   4  -6 -12  186.03    7.80
   4  -6 -12  165.62    7.83
   4  -6 -13   67.27    5.08
   4   6  13   64.64    5.43
   4  -6 -13   79.78    4.41
   4  -6 -14  300.83   12.40
   4   6  14  254.30   12.36
   4  -6 -15    4.79    2.66
   4   6  15    6.73    3.67
   4  -6 -16   83.15    5.60
   4   6  16   72.56    5.83
   4  -6 -17  510.53   19.95
   4   6  17  504.14   20.30
   4  -6 -18  311.09   12.93
   4   6  18  281.85   13.09
   4  -6 -19   41.84    4.19
   4   6  19   42.49    5.05
   4  -6 -20  151.84    7.77
   4   6  20  143.96    8.12
   4  -6 -21  214.10    9.98
   4   6  21  215.88   10.31
   4  -6 -22   46.44    4.20
   4   6  22   42.03    4.69
   4  -6 -23   74.20    5.28
   4   6  23   76.96    5.54
   4  -6 -24  351.40   14.24
   4   6  24  360.34   14.50
   4   6  25   26.10    3.62
   4   6  30   27.94    2.33
   4   6  31   21.14    1.70
   4   6  32   49.72    2.32
  -4   7  30   27.23    1.74
  -4   7  29   31.92    2.26
   4  -7  28    6.07    0.74
  -4   7  28    9.71    1.92
  -4   7  27   43.17    3.20
   4  -7  27   29.98    1.82
   4  -7  26   51.16    2.65
   4  -7  25    6.79    1.42
   4  -7  24   27.02    2.24
   4  -7  23    9.23    1.88
   4  -7  22  161.59    6.62
   4  -7  22  187.80    7.30
   4  -7  21   47.40    2.85
   4  -7  21   49.29    3.46
   4  -7  20   13.22    2.44
   4  -7  20   14.81    2.02
   4  -7  19   46.31    3.24
   4  -7  19   57.76    3.84
   4  -7  18  118.91    5.59
   4  -7  18  116.27    5.94
   4  -7  17   31.39    3.04
   4  -7  17   38.68    3.55
   4  -7  16   65.32    4.13
   4  -7  16   64.78    4.50
   4  -7  15  140.54    6.69
   4  -7  15  142.23    7.03
   4  -7  14   14.90    3.21
   4  -7  14   13.99    2.85
   4  -7  13   97.34    5.48
   4  -7  13   98.75    5.80
   4  -7  12   18.79    3.49
   4  -7  12   17.22    3.00
   4  -7  11  154.94    7.46
   4  -7  11  158.70    7.65
   4  -7  10   57.97    4.51
   4  -7  10   68.97    4.73
   4  -7   9   12.95    3.02
   4  -7   9   11.11    3.04
   4  -7   8  198.50    8.96
   4  -7   7   40.50    3.84
   4  -7   6   54.49    4.36
   4  -7   5  146.78    7.08
   4  -7   5  133.49    6.99
   4  -7   4    3.17    2.54
   4  -7   4    7.01    2.92
   4  -7   3   99.18    5.46
   4  -7   3   86.56    5.31
   4  -7   2   42.10    3.96
   4  -7   2   50.84    4.07
   4  -7   1  177.99    7.95
   4  -7   1  168.56    7.99
   4  -7   0  117.36    6.16
   4  -7   0  122.84    6.28
   4  -7  -1  181.53    7.99
   4  -7  -1  169.38    8.06
   4  -7  -2   46.62    3.84
   4  -7  -2   50.58    3.97
   4  -7  -3   92.31    5.13
   4  -7  -3   91.81    5.28
   4  -7  -4    3.71    2.26
   4  -7  -4    5.26    2.52
   4  -7  -5  153.04    6.90
   4  -7  -5  144.46    7.17
   4  -7  -6   48.08    3.50
   4  -7  -6   52.18    3.83
   4  -7  -6   51.69    3.92
   4  -7  -7   26.81    2.86
   4  -7  -7   39.03    3.34
   4  -7  -7   32.50    3.23
   4  -7  -8  206.09    9.30
   4   7   8  210.20    9.33
   4  -7  -8  211.31    9.26
   4  -7  -9   13.25    2.56
   4   7   9   15.30    2.71
   4  -7  -9   12.70    2.53
   4  -7 -10   60.80    4.38
   4   7  10   62.40    4.53
   4  -7 -10   58.95    4.14
   4  -7 -11  134.30    7.06
   4   7  11  141.59    7.29
   4  -7 -11  134.66    6.66
   4  -7 -12   16.88    2.94
   4   7  12   15.31    3.11
   4  -7 -12   16.61    2.43
   4  -7 -13   93.10    5.62
   4   7  13   89.59    5.72
   4  -7 -13   74.93    4.57
   4  -7 -14   17.37    3.17
   4   7  14   15.14    3.44
   4  -7 -15  146.05    7.36
   4   7  15  129.12    7.46
   4  -7 -16   58.27    4.57
   4   7  16   58.14    4.94
   4  -7 -17   38.57    3.94
   4   7  17   37.39    4.36
   4  -7 -18  124.77    6.76
   4   7  18  120.98    7.02
   4  -7 -19   55.29    4.54
   4   7  19   54.83    4.80
   4  -7 -20   13.28    2.86
   4   7  20   13.93    3.42
   4  -7 -21   46.58    3.99
   4   7  21   45.90    4.25
   4  -7 -22  194.65    8.77
   4   7  22  186.93    8.83
   4   7  23    9.28    2.92
   4  -7 -23    8.49    2.62
   4  -7 -24   28.70    3.12
   4   7  24   28.28    3.40
   4   7  25    6.62    2.54
   4  -7 -25    4.97    2.14
   4   7  26   54.93    3.73
   4   7  27   43.33    3.13
  -4   8  28   19.52    1.59
  -4   8  27    8.73    1.58
   4  -8  26    7.35    0.82
  -4   8  26   13.68    2.14
   4  -8  25   29.75    1.83
  -4   8  25   41.48    3.21
   4  -8  24   53.16    2.76
   4  -8  23    5.90    1.47
   4  -8  22  150.53    6.29
   4  -8  21  277.56   10.60
   4  -8  20   32.93    2.77
   4  -8  19   64.33    3.04
   4  -8  19   64.70    3.82
   4  -8  18   51.25    2.84
   4  -8  18   62.64    3.79
   4  -8  17   37.03    2.50
   4  -8  17   44.99    3.39
   4  -8  16   59.67    3.30
   4  -8  16   57.89    4.03
   4  -8  15  124.60    5.70
   4  -8  15  142.12    6.54
   4  -8  14   37.71    2.89
   4  -8  14   45.94    3.78
   4  -8  13   77.89    4.21
   4  -8  13   82.75    5.03
   4  -8  12  102.17    5.10
   4  -8  12  108.19    5.91
   4  -8  11  237.26    9.65
   4  -8  11  245.96   10.31
   4  -8  10   23.77    2.72
   4  -8  10   30.63    3.81
   4  -8   9   83.98    4.68
   4  -8   9   87.20    5.37
   4  -8   8   77.48    4.61
   4  -8   8   90.79    5.38
   4  -8   7   43.22    3.41
   4  -8   6   31.11    3.11
   4  -8   5   29.92    3.10
   4  -8   4  100.07    5.26
   4  -8   3  431.81   15.76
   4  -8   3  401.38   16.26
   4  -8   2    4.51    2.82
   4  -8   2    5.07    2.41
   4  -8   1   42.22    3.43
   4  -8   1   37.72    3.88
   4  -8   0  100.75    5.27
   4  -8   0  104.42    5.85
   4  -8  -1   48.16    3.73
   4  -8  -1   54.18    4.32
   4  -8  -2    2.39    2.78
   4  -8  -2    2.88    2.29
   4  -8  -3  396.16   15.03
   4  -8  -3  402.76   15.72
   4  -8  -4  105.00    5.34
   4  -8  -4  101.64    5.86
   4  -8  -5   29.31    3.16
   4  -8  -5   30.29    3.46
   4  -8  -6   27.80    3.12
   4  -8  -6   28.93    3.38
   4  -8  -7   24.13    2.54
   4  -8  -7   33.99    3.22
   4  -8  -7   29.76    3.38
   4  -8  -8   68.46    4.31
   4  -8  -8   69.28    4.41
   4  -8  -8   70.86    4.69
   4  -8  -9   80.39    4.94
   4  -8  -9   99.46    5.11
   4  -8  -9   90.91    5.32
   4  -8 -10   24.15    2.81
   4   8  10   24.77    2.75
   4  -8 -10   21.08    2.89
   4  -8 -11  215.24    9.47
   4   8  11  221.57    9.47
   4  -8 -11  209.08    9.32
   4  -8 -12  103.26    5.63
   4   8  12   99.41    5.61
   4  -8 -13   58.15    4.17
   4   8  13   62.11    4.26
   4  -8 -14   48.58    3.98
   4   8  14   52.04    4.01
   4  -8 -15  161.90    7.71
   4   8  15  153.53    7.64
   4  -8 -16   58.32    4.23
   4   8  16   54.89    4.21
   4  -8 -17   30.32    3.29
   4   8  17   30.78    3.46
   4  -8 -18   57.60    4.18
   4   8  18   53.54    4.22
   4  -8 -19   79.55    4.85
   4   8  19   73.90    4.77
   4  -8 -20   37.27    3.35
   4   8  20   34.15    3.49
   4  -8 -21  286.38   11.26
   4   8  21  264.49   11.14
   4  -8 -22  166.53    7.31
   4   8  22  156.87    7.27
   4   8  23   12.25    2.41
   4  -8 -23   12.98    2.30
   4  -8 -24   56.58    3.49
   4   8  24   55.67    3.56
   4  -8 -25   36.57    2.66
   4   8  25   36.01    2.70
   4   8  26   10.16    1.59
   4  -8 -26   10.57    1.60
   4   8  27    8.79    1.25
   4  -8 -27    8.35    1.26
   4   8  28   15.43    1.18
   4  -9  23   11.50    1.14
   4  -9  22   35.78    2.14
   4  -9  21   16.20    1.79
   4  -9  20  383.64   14.02
   4  -9  19   72.47    3.86
   4  -9  18    5.42    1.97
   4  -9  17  237.24    9.50
   4  -9  16    2.16    2.08
   4  -9  15   40.51    2.26
   4  -9  15   42.10    3.31
   4  -9  14  107.81    4.60
   4  -9  14  116.22    5.67
   4  -9  13   53.92    2.96
   4  -9  13   69.33    4.19
   4  -9  12   53.61    2.95
   4  -9  12   52.27    3.99
   4  -9  11   61.92    3.30
   4  -9  11   63.93    4.40
   4  -9  10   51.39    3.02
   4  -9  10   53.16    4.19
   4  -9   9    1.88    2.72
   4  -9   9    5.47    1.69
   4  -9   8   45.11    2.94
   4  -9   8   44.02    4.02
   4  -9   7    6.51    3.08
   4  -9   7    9.25    1.94
   4  -9   6  288.22   10.68
   4  -9   6  260.84   11.47
   4  -9   5  103.69    4.96
   4  -9   4    6.68    2.09
  -4  -9  -4    4.75    2.94
   4  -9   3  199.21    8.16
  -4  -9  -3  203.77   10.19
   4  -9   2   74.19    4.03
   4  -9   2   61.22    4.83
  -4  -9  -2   76.23    5.87
   4  -9   1   82.06    4.36
   4  -9   1   79.87    5.31
  -4  -9   0   71.06    5.04
   4  -9   0   83.32    4.31
   4  -9   0   72.86    5.08
  -4  -9   1   82.13    5.38
   4  -9  -1   82.34    4.43
   4  -9  -1   80.25    5.26
   4  -9  -2   74.20    4.25
   4  -9  -2   78.50    5.18
   4  -9  -3  196.26    8.03
   4  -9  -3  185.00    8.81
   4  -9  -4    5.32    2.83
   4  -9  -4    6.99    2.46
   4  -9  -5  108.15    5.39
   4  -9  -5  108.23    6.09
   4  -9  -6  282.89   11.01
   4  -9  -6  276.65   11.75
   4  -9  -7    8.37    2.76
   4  -9  -8   38.46    2.78
   4  -9  -8   35.55    3.60
   4  -9  -9    2.89    1.50
   4  -9  -9    1.28    2.35
   4  -9 -10   44.57    3.21
   4  -9 -10   48.67    3.79
   4  -9 -11   54.45    3.54
   4  -9 -12   53.04    3.58
   4   9  12   49.85    3.16
   4  -9 -13   63.62    3.98
   4   9  13   61.04    3.65
   4  -9 -14  115.01    5.57
   4   9  14  102.39    5.18
   4  -9 -15   44.02    3.35
   4   9  15   45.04    3.12
   4  -9 -16    1.49    1.85
   4   9  16    1.63    1.66
   4  -9 -17  241.42    9.65
   4   9  17  229.04    9.45
   4  -9 -18    5.35    1.91
   4   9  18    3.46    1.71
   4  -9 -19   70.09    3.91
   4   9  19   64.24    3.72
   4  -9 -20  377.10   14.02
   4   9  20  368.35   13.82
   4  -9 -21   18.94    2.10
   4   9  21   17.31    1.89
   4  -9 -22   35.92    2.47
   4   9  22   32.72    2.30
   4  -9 -23   12.37    1.59
   4   9  23   11.69    1.37
   4  -9 -24   38.22    2.23
   4   9  24   34.63    2.01
   4  -9 -25   17.84    1.38
  -4  10  22  102.08    4.42
   4 -10  21    6.12    0.80
  -4  10  21    8.10    1.49
   4 -10  20   26.07    1.71
   4 -10  19  183.56    7.11
   4 -10  18    3.18    1.46
   4 -10  17   52.52    3.11
   4 -10  16   31.13    2.54
   4 -10  15  160.42    6.87
   4 -10  14    2.12    1.98
   4 -10  13   20.00    2.63
   4 -10  12   51.17    3.67
   4 -10  11   72.41    3.23
   4 -10  11   76.08    4.51
   4 -10  10    4.76    2.51
   4 -10  10    2.88    1.11
   4 -10   9   68.43    3.31
   4 -10   9   74.42    4.63
   4 -10   8   22.65    1.84
   4 -10   8   22.47    3.17
   4 -10   7  144.99    5.97
   4 -10   7  156.39    7.21
   4 -10   6   70.99    3.58
   4 -10   6   78.16    4.87
   4 -10   5   29.74    2.25
   4 -10   5   27.22    3.52
  -4 -10  -5   29.24    3.62
   4 -10   4  105.71    4.72
  -4 -10  -4   99.96    6.42
   4 -10   3   18.05    2.05
  -4 -10  -3   17.81    3.44
   4 -10   2    5.05    1.77
  -4 -10  -2    6.47    3.09
   4 -10   1  127.25    5.64
  -4 -10  -1  137.08    7.68
   4 -10   0    3.23    2.97
  -4 -10   0    5.45    2.17
   4 -10   0    3.31    1.80
  -4 -10   0    2.60    3.08
  -4 -10   1  118.22    6.29
   4 -10  -1  110.66    5.21
   4 -10  -1  122.13    6.42
  -4 -10   1  125.20    7.46
  -4 -10   2    6.09    2.49
   4 -10  -2    5.74    2.87
  -4 -10   3   18.98    3.04
   4 -10  -3   15.76    3.08
  -4 -10   4  111.91    6.12
   4 -10  -4   94.54    5.75
  -4 -10   5   17.68    3.10
   4 -10  -5   21.28    3.20
  -4 -10   6  103.11    5.93
   4 -10  -6   80.71    5.21
   4 -10  -7  147.76    7.13
   4 -10  -8   18.86    2.83
   4 -10 -10    2.17    1.04
   4 -10 -11   58.69    3.18
   4 -10 -12   44.46    2.68
   4 -10 -13   13.14    1.66
   4 -10 -14    0.56    1.26
   4 -10 -15  133.54    5.73
   4 -10 -16   26.93    2.10
   4 -10 -17   56.54    3.06
   4 -10 -18    0.31    1.06
   4 -10 -19  149.59    6.00
   4 -10 -20   17.16    1.43
  -4 -10  21   10.12    1.79
   4 -10 -21    8.40    0.99
  -4 -10  22   96.27    4.41
  -4 -10  23    1.12    0.79
   4 -11  17   21.17    1.44
  -4  11  17   19.69    1.49
   4 -11  16   13.98    1.44
   4 -11  15   33.68    2.25
   4 -11  14   68.23    3.52
   4 -11  13   28.39    2.43
   4 -11  12   57.79    3.47
   4 -11  11    4.67    1.90
   4 -11  10   18.17    2.47
   4 -11   9   23.43    2.71
   4 -11   8   78.93    4.53
   4 -11   7   22.89    2.87
   4 -11   6   11.18    2.53
   4 -11   5    0.42    2.32
   4 -11   4   15.30    2.88
  -4 -11  -4   12.66    2.57
   4 -11   3   10.73    2.71
  -4 -11  -3   10.22    2.59
  -4 -11  -2   46.16    4.09
  -4 -11  -1   16.13    3.02
  -4 -11   0   23.44    3.33
  -4 -11   1   22.13    2.38
   4 -11  -1   18.44    3.03
  -4 -11   1   18.06    3.27
  -4 -11   2   51.40    3.52
  -4 -11   2   55.43    4.68
   4 -11  -2   48.59    3.92
  -4 -11   3   12.62    2.16
   4 -11  -3   12.24    2.76
  -4 -11   3    9.58    3.18
  -4 -11   4   23.38    2.62
   4 -11  -4   15.56    2.76
  -4 -11   4   17.28    3.34
  -4 -11   5    4.34    2.17
  -4 -11   5    3.93    2.93
  -4 -11   6   14.30    2.43
  -4 -11   7   22.55    2.80
  -4 -11   8   81.33    4.85
  -4 -11   9   23.69    2.98
  -4 -11  10   25.94    2.79
  -4 -11  11   10.47    2.42
  -4 -11  12   62.51    4.12
  -4 -11  13   30.13    2.91
  -4 -11  14   71.12    4.16
  -4 -11  15   44.36    3.09
  -4 -11  16   12.39    1.84
  -4 -11  17   23.76    2.14
  -4 -11  18    3.27    1.16
  -4 -11  19   32.06    1.98
   4 -12  12   90.68    3.81
   4 -12  11    2.86    1.03
   4 -12  10   30.95    2.14
   4 -12   9    0.60    1.30
   4 -12   8   32.86    2.44
   4 -12   7   33.29    2.55
   4 -12   6  146.54    6.25
   4 -12   5   27.15    2.49
   4 -12   4    0.62    1.72
   4 -12   3    4.07    1.85
  -4 -12  -2   28.79    2.47
   4 -12   2   32.09    2.75
  -4 -12  -1    2.07    1.54
  -4 -12   0   16.20    2.22
  -4 -12   1    2.64    1.83
  -4 -12   2   33.56    2.92
  -4 -12   3    1.58    0.92
  -4 -12   3    4.20    1.93
  -4 -12   4    3.19    1.11
  -4 -12   4    3.33    1.81
  -4 -12   5   24.14    1.95
  -4 -12   5   28.71    2.76
  -4 -12   6  131.98    5.77
  -4 -12   6  147.62    6.59
  -4 -12   7   33.60    2.27
  -4 -12   7   28.74    2.77
  -4 -12   8   26.66    2.08
  -4 -12   8   23.14    2.51
  -4 -12   9    0.51    1.12
  -4 -12   9    0.57    1.55
  -4 -12  10   31.25    2.17
  -4 -12  10   32.63    2.62
  -4 -12  11    4.01    1.13
  -4 -12  11    2.34    1.39
  -4 -12  12   76.86    3.69
  -4 -12  12   91.08    4.16
  -4 -12  13    1.88    0.80
   5   0   0   -0.26    2.06
   5   0  -1  135.62    6.22
   5   0   1  127.11    6.43
   5   0  -2    1.08    1.77
   5   0   2   -0.93    2.29
   5   0  -3   47.03    3.08
   5   0   3   38.98    3.80
   5   0   3   49.61    2.95
   5   0   4    2.47    1.43
   5   0  -4    0.54    1.40
   5   0   5    2.21    1.54
   5   0  -5    0.54    1.22
   5   0  -6  112.96    4.87
   5   0   6  116.45    5.59
   5   0   7   16.49    2.37
   5   0  -7   12.36    1.35
   5   0   8  308.74   12.29
   5   0   9    4.42    2.12
   5   0  10  252.17   10.52
   5   0  11   47.56    3.80
   5   0  12  219.33    9.55
   5   0  13  781.44   28.27
   5   0  14   10.50    2.76
   5   0  15   38.16    3.54
   5   0  16   44.75    3.85
   5   0  17    8.64    2.68
   5   0  18    4.73    2.53
   5   0  19    0.93    2.33
   5   0  20    3.20    2.37
   5   0  21   52.44    3.72
   5   0  26    7.28    1.45
   5   0  27   25.35    1.79
   5   0  28    4.50    0.82
   5  -1  28    6.10    0.89
   5  -1  28    9.00    0.87
   5  -1  27    9.50    1.20
   5  -1  26   51.93    2.77
   5  -1  25   46.28    2.77
   5  -1  20  164.78    7.37
   5  -1  19   15.74    2.75
   5  -1  18   15.80    2.83
   5  -1  17   28.47    3.26
   5  -1  16   73.60    4.71
   5  -1  15  113.94    6.01
   5  -1  14  191.11    8.62
   5  -1  13  124.54    6.36
   5  -1  12   24.49    3.19
   5  -1  11  111.42    5.89
   5  -1  10   58.35    4.15
   5  -1   9  137.20    6.64
   5  -1   8   40.46    3.33
   5  -1   7   18.87    2.57
   5  -1   6  173.51    7.59
   5  -1   5   27.86    2.62
   5  -1   4  155.24    7.67
   5  -1   4  156.54    6.82
   5  -1   3    4.08    1.39
   5   1  -3    2.62    1.28
   5  -1   3    3.32    2.65
   5   1  -2  252.36    9.98
   5  -1   2  259.43   10.86
   5  -1   2  262.88   10.03
   5   1  -1   27.06    2.48
   5  -1   1   23.86    3.14
   5  -1   0  178.60    7.81
   5   1   0  166.65    7.41
   5  -1  -1   26.50    2.93
   5   1   1   24.05    2.70
   5  -1  -2  240.03    9.66
   5   1   2  227.57    9.71
   5  -1  -3    3.99    1.90
   5  -1  -4  139.57    6.19
   5  -1  -5   21.36    2.20
   5   1   5   26.57    2.30
   5  -1  -6  205.93    7.96
   5   1   6  192.41    8.33
   5  -1  -7   18.28    1.78
   5   1   7   21.67    2.41
   5  -1  -8   44.71    2.59
   5   1   8   48.12    3.40
   5  -1  -9  120.18    5.14
   5   1   9  141.87    6.40
   5  -1 -10   52.76    2.62
   5   1  10   45.91    3.71
   5   1  11  108.00    5.73
   5   1  12   21.56    2.88
   5   1  13  123.15    6.36
   5   1  14  202.35    8.99
   5   1  15  100.85    5.61
   5   1  16   71.67    4.68
   5   1  17   31.88    3.35
   5   1  18   16.28    2.90
   5   1  19   17.63    2.84
   5   1  20  167.83    7.53
   5   1  21   75.10    4.46
   5   1  22  160.64    7.05
   5   1  23  158.34    6.86
   5   1  28    6.36    0.87
   5  -2  28   25.42    1.33
   5  -2  27    5.97    0.92
   5  -2  27    4.20    0.91
   5  -2  26    7.94    1.38
   5  -2  26   11.03    1.32
   5  -2  25   22.51    1.87
   5  -2  24   23.08    2.07
   5  -2  23   53.75    3.25
   5  -2  18   57.81    4.00
   5  -2  17   23.87    3.01
   5  -2  16   59.34    4.14
   5  -2  15  199.25    8.73
   5  -2  14   27.46    3.20
   5  -2  13  232.83    9.93
   5  -2  12  207.87    9.08
   5  -2  11   26.75    3.12
   5  -2  10   79.11    4.72
   5  -2   9  154.71    7.19
   5  -2   8   11.03    2.25
   5  -2   7  150.94    7.80
   5  -2   7  150.96    6.93
   5  -2   6  427.13   17.58
   5  -2   6  476.93   17.07
   5  -2   5   28.57    4.01
   5  -2   5   28.56    2.64
   5  -2   4    6.19    1.73
   5  -2   4    5.80    3.11
   5  -2   3   43.78    4.06
   5  -2   3   38.09    2.78
   5  -2   2  107.50    6.18
   5  -2   2  119.72    5.32
   5  -2   1    6.18    1.42
   5  -2   1    5.86    2.73
   5   2   0   15.52    1.87
   5  -2   0   18.81    2.98
   5  -2   0   16.84    1.70
   5  -2  -1    6.08    2.47
   5   2   1    4.13    1.63
   5  -2  -2   95.59    4.93
   5   2   2   88.34    4.67
   5  -2  -3   36.91    3.04
   5  -2  -4    3.70    1.95
   5  -2  -5   32.26    2.65
   5  -2  -6  459.05   16.59
   5   2   6  453.44   16.79
   5  -2  -7  150.47    6.20
   5   2   7  141.54    6.53
   5   2   8    8.51    1.83
   5  -2  -8    7.27    1.49
   5  -2  -9  150.24    6.24
   5   2   9  162.62    7.10
   5  -2 -10   57.24    3.05
   5   2  10   69.23    4.12
   5  -2 -11   22.71    1.78
   5   2  11   24.40    2.81
   5   2  12  219.47    9.45
   5   2  13  248.33   10.40
   5   2  14   21.89    2.94
   5   2  15  191.42    8.50
   5   2  16   43.73    3.68
   5   2  17   20.27    2.87
   5   2  18   65.77    4.34
   5   2  19   72.01    4.42
   5   2  20  113.26    5.67
   5   2  21   70.14    4.15
   5   2  22   38.97    3.06
   5   2  23   64.18    3.72
   5   2  24   28.96    2.38
   5   2  25   21.44    2.01
   5   2  26    6.00    1.28
   5  -3  27   12.66    0.95
   5  -3  26    4.70    0.94
   5  -3  26    4.46    0.89
   5  -3  25   30.58    2.02
   5  -3  25   37.02    2.10
   5  -3  24    6.10    1.35
   5  -3  24    4.57    1.52
   5  -3  23   20.02    2.16
   5  -3  23   20.89    2.01
   5  -3  22    6.79    1.72
   5  -3  22    4.26    2.02
   5  -3  21   24.13    2.71
   5  -3  21   25.35    2.42
   5  -3  17   19.97    2.73
   5  -3  16   11.12    2.55
   5  -3  15   24.38    2.92
   5  -3  14   20.57    2.85
   5  -3  13    5.13    2.38
   5  -3  12  203.94    8.78
   5  -3  11  263.70   12.26
   5  -3  11  325.11   12.01
   5  -3  10   24.44    2.92
   5  -3   9    8.41    2.36
   5  -3   8  188.99    8.16
   5  -3   7    9.07    2.20
   5  -3   6  453.14   16.89
   5  -3   5    1.43    1.74
   5  -3   5    6.15    3.45
   5  -3   4    4.74    1.78
   5  -3   4    8.93    3.27
   5  -3   3   12.87    3.27
   5  -3   3   15.59    2.06
   5  -3   2  732.45   26.45
   5  -3   2  729.36   25.87
   5  -3   1   67.74    4.37
   5  -3   1   47.14    3.08
   5  -3   0   51.80    3.97
   5  -3   0   54.57    3.15
   5  -3  -1   69.60    4.10
   5  -3  -1   45.58    2.94
   5  -3  -2  731.42   26.15
   5  -3  -3   16.78    2.54
   5   3   3   14.73    1.91
   5  -3  -4    5.65    2.08
   5  -3  -5    8.57    2.03
   5  -3  -6  433.29   15.84
   5  -3  -7   17.31    2.09
   5  -3  -8  179.56    7.18
   5   3   8  173.36    7.46
   5   3   9   12.41    1.98
   5  -3  -9   13.91    1.79
   5  -3 -10   27.81    2.11
   5   3  10   23.07    2.51
   5  -3 -11  291.65   11.20
   5   3  11  326.26   12.08
   5   3  12  200.58    8.63
   5   3  13    4.35    2.22
   5   3  14   19.32    2.63
   5   3  15   19.39    2.65
   5   3  16   14.00    2.50
   5   3  17   26.97    2.92
   5   3  18  104.70    5.41
   5   3  19  202.54    8.54
   5   3  20   17.41    2.41
   5   3  21   33.75    2.81
   5   3  22    9.38    1.94
   5   3  23   16.10    1.95
   5   3  24    5.14    1.49
   5   3  25   33.05    2.14
   5   3  26    5.85    1.03
   5   3  27   18.10    1.20
   5  -4  26   43.02    1.96
   5  -4  25   29.06    1.52
   5  -4  25   33.26    1.75
   5  -4  24   25.64    1.63
   5  -4  24   29.12    1.82
   5  -4  23   22.79    1.82
   5  -4  23   28.22    1.93
  -5   4  23   18.01    1.60
   5  -4  22    9.70    1.72
   5  -4  22   12.12    1.64
   5  -4  21   17.77    2.10
   5  -4  21   17.54    1.97
   5  -4  20   12.58    1.98
   5  -4  20   12.97    2.20
   5  -4  19   97.75    4.94
   5  -4  18   47.42    3.56
   5  -4  17    6.77    2.66
   5  -4  16   72.71    4.67
   5  -4  15  275.18   11.01
   5  -4  15  262.62   10.63
   5  -4  14  157.09    7.43
   5  -4  14  151.47    6.92
   5  -4  13   13.38    2.45
   5  -4  13    8.91    3.21
   5  -4  12   14.83    3.43
   5  -4  12   19.71    2.64
   5  -4  11  146.22    7.30
   5  -4  11  140.13    6.57
   5  -4  10    6.53    2.26
   5  -4  10    5.69    3.34
   5  -4   9  257.99   11.22
   5  -4   9  275.94   10.79
   5  -4   8   24.41    4.00
   5  -4   8   33.64    3.04
   5  -4   7   56.77    3.67
   5  -4   6  155.61    6.92
   5  -4   5   23.62    2.59
   5  -4   4   51.08    3.37
   5  -4   3    6.89    1.84
   5  -4   2  295.18   12.22
   5  -4   2  312.01   11.79
   5  -4   1  130.34    6.30
   5  -4   1  118.50    5.58
   5  -4   0  141.13    6.46
   5  -4   0  122.82    5.73
   5  -4  -1  121.25    5.76
   5  -4  -1  104.04    5.06
   5  -4  -2  334.06   12.43
   5  -4  -2  308.55   12.00
   5  -4  -3    6.41    1.37
   5  -4  -3    8.32    2.29
   5  -4  -4   54.13    3.52
   5  -4  -5   24.08    2.52
   5  -4  -6  162.08    6.84
   5  -4  -7   44.46    2.95
   5  -4  -8   28.17    2.38
   5  -4  -9  264.88   10.07
   5   4  10    5.88    1.57
   5  -4 -10    6.17    1.61
   5  -4 -11  127.38    5.36
   5   4  11  120.91    5.70
   5   4  12   10.96    1.93
   5   4  13   16.93    2.22
   5   4  14  137.40    6.29
   5   4  15  213.23    8.86
   5   4  16   68.53    4.02
   5   4  17   10.51    2.07
   5   4  18   44.19    3.11
   5   4  19   97.62    4.81
   5   4  20    8.70    1.79
   5   4  21   22.60    2.20
   5   4  22    8.76    1.63
   5   4  23   25.14    1.96
   5   4  24   33.08    2.03
   5   4  25   32.21    1.80
   5  -5  25   71.67    2.87
   5  -5  24   19.03    1.27
   5  -5  23   65.60    2.71
  -5   5  23   54.62    3.00
   5  -5  23   83.48    3.15
   5  -5  22   47.76    2.32
   5  -5  22   48.46    2.56
   5  -5  21   50.35    2.60
   5  -5  21   51.17    2.75
   5  -5  20    9.03    1.59
   5  -5  20   10.22    1.59
   5  -5  19   31.20    2.44
   5  -5  19   33.04    2.42
   5  -5  18   90.46    4.33
   5  -5  18   85.16    4.24
   5  -5  17   15.44    2.29
   5  -5  16  175.87    7.44
   5  -5  15   57.19    3.80
   5  -5  14    6.88    2.09
   5  -5  14   13.54    2.69
   5  -5  13   33.61    3.35
   5  -5  13   30.63    2.79
   5  -5  12  131.36    6.42
   5  -5  12  136.93    6.22
   5  -5  11   52.98    3.98
   5  -5  11   49.07    3.46
   5  -5  10    4.14    2.14
   5  -5  10    5.34    2.94
   5  -5   9   33.01    3.57
   5  -5   9   28.67    2.79
   5  -5   8   45.26    3.94
   5  -5   8   50.38    3.47
   5  -5   7   27.94    3.63
   5  -5   7   29.55    2.80
   5  -5   6    6.29    2.01
   5  -5   6    7.99    3.00
   5  -5   5  107.35    5.63
   5  -5   5   93.19    4.93
   5  -5   4  298.29   11.58
   5  -5   3   42.59    3.05
   5  -5   2    7.51    1.84
   5  -5   1   55.73    3.44
   5  -5   0    0.11    1.50
   5  -5  -1   46.27    3.49
   5  -5  -1   48.44    3.08
   5  -5  -2   10.80    1.76
   5  -5  -2   11.95    2.40
   5  -5  -3   50.97    3.38
   5  -5  -3   43.37    2.87
   5  -5  -4  271.85   10.19
   5  -5  -4  249.65    9.99
   5  -5  -5  101.76    4.90
   5  -5  -6    4.77    1.92
   5  -5  -7   27.27    2.45
   5  -5  -8   44.31    2.91
   5  -5  -9   34.21    2.56
   5  -5 -10    2.73    1.55
   5   5  12  119.93    5.21
   5   5  13   29.50    2.24
   5   5  14    4.34    1.35
   5   5  15   45.53    2.84
   5   5  16  155.08    6.48
   5   5  17   18.19    1.92
   5   5  18   95.13    4.42
   5   5  19   31.60    2.26
   5   5  20    6.61    1.29
   5   5  21   39.06    2.24
   5   5  22   37.56    2.08
   5   5  23   74.75    3.16
   5  -6  23   46.32    2.08
   5  -6  22  144.43    5.39
  -5   6  22  136.03    5.66
   5  -6  21   63.17    2.64
   5  -6  21   77.90    3.16
   5  -6  20   10.87    1.00
   5  -6  20   12.67    1.45
   5  -6  19    6.48    1.41
   5  -6  19    5.53    1.02
   5  -6  18   28.78    1.91
   5  -6  18   27.99    2.20
   5  -6  17    4.97    1.61
   5  -6  17    6.29    1.43
   5  -6  16  155.24    6.26
   5  -6  15   70.16    3.64
   5  -6  14   17.85    2.16
   5  -6  13   75.75    4.06
   5  -6  12  167.36    6.85
   5  -6  12  153.01    6.89
   5  -6  11    9.57    2.07
   5  -6  11    7.92    2.28
   5  -6  10   26.17    2.81
   5  -6  10   29.16    2.68
   5  -6   9   14.95    2.30
   5  -6   9   14.39    2.52
   5  -6   8   73.05    4.23
   5  -6   8   72.79    4.15
   5  -6   7   36.13    3.26
   5  -6   7   40.51    3.04
   5  -6   6   54.13    3.77
   5  -6   6   58.58    3.65
   5  -6   5   38.17    3.34
   5  -6   5   44.84    3.18
   5  -6   4   46.07    3.38
   5  -6   4   38.52    3.02
   5  -6   3   57.11    3.79
   5  -6   3   54.27    3.52
   5  -6   2    2.25    1.80
   5  -6   2    1.68    2.21
   5  -6   1   77.51    4.39
   5  -6   1   84.71    4.34
   5  -6   0   48.58    3.22
   5  -6  -1   71.28    3.91
   5  -6  -2    2.05    1.46
   5  -6  -3   53.24    3.19
   5  -6  -4   40.40    2.86
   5  -6  -4   33.47    2.48
   5  -6  -5   31.59    2.61
   5  -6  -5   27.71    2.18
   5  -6  -6   59.71    3.44
   5  -6  -7   28.98    2.52
   5  -6  -8   73.60    3.81
   5  -6  -9   16.25    2.06
   5   6  17    1.20    0.73
   5   6  18   17.33    1.20
   5   6  19    3.63    0.69
   5  -7  21    4.81    0.66
   5  -7  20   26.16    1.54
   5  -7  19   44.44    2.31
   5  -7  18   21.33    1.19
   5  -7  18   26.16    1.74
   5  -7  17    5.65    1.34
   5  -7  17    4.36    0.76
   5  -7  16   86.02    3.58
   5  -7  16   91.42    4.09
   5  -7  15   38.01    2.04
   5  -7  15   32.82    2.42
   5  -7  14   22.60    1.73
   5  -7  13   52.83    2.78
   5  -7  12   20.15    1.83
   5  -7  11   13.85    2.08
   5  -7  11   14.64    1.77
   5  -7  10    8.03    1.94
   5  -7  10    8.47    1.74
   5  -7   9  110.77    4.97
   5  -7   9  115.07    5.32
   5  -7   8   88.12    4.29
   5  -7   8   91.99    4.58
   5  -7   7  133.55    5.78
   5  -7   7  137.26    6.09
   5  -7   6   59.69    3.39
   5  -7   6   56.22    3.55
   5  -7   5    4.24    1.92
   5  -7   5    7.12    1.98
   5  -7   4   18.03    2.27
   5  -7   4   17.36    2.28
   5  -7   3   30.33    2.55
   5  -7   3   26.52    2.56
   5  -7   2   87.66    4.39
   5  -7   2   91.48    4.65
   5  -7   1   21.83    2.34
   5  -7   1   19.10    2.30
   5  -7   0    6.22    1.82
   5  -7   0    6.61    1.98
   5  -7  -1   23.27    2.43
   5  -7  -1   18.61    2.19
   5  -7  -2   83.64    4.12
   5  -7  -2   80.43    4.20
   5  -7  -3   26.34    2.26
   5  -7  -4   15.81    1.85
   5  -7  -5    3.03    1.22
   5  -7  -7  113.67    5.05
   5  -8  18   39.27    1.89
   5  -8  17    5.71    0.93
   5  -8  16   18.76    1.47
   5  -8  15    1.96    1.14
   5  -8  15    1.72    0.46
   5  -8  14   45.44    2.05
   5  -8  14   56.42    2.77
   5  -8  13   43.97    2.04
   5  -8  12   87.09    3.55
   5  -8  11   12.52    1.30
   5  -8  10   23.14    1.64
   5  -8  10   23.85    2.20
   5  -8   9   51.25    2.56
   5  -8   9   46.31    3.02
   5  -8   8   24.57    1.84
   5  -8   8   26.16    2.35
   5  -8   7    8.55    1.88
   5  -8   7    8.26    1.47
   5  -8   6    0.96    1.78
   5  -8   6    2.24    1.37
   5  -8   5    8.40    1.88
   5  -8   5    7.66    1.54
   5  -8   4   68.28    3.31
   5  -8   4   62.89    3.64
   5  -8   3  120.88    5.07
   5  -8   3  118.24    5.45
   5  -8   2   71.19    3.59
   5  -8   2   76.29    3.98
   5  -8   1   11.93    1.91
   5  -8   1   13.12    1.82
   5  -8   0    1.30    1.64
   5  -8   0    2.24    1.62
   5  -8  -1   12.47    1.81
   5  -8  -1   11.04    1.81
   5  -8  -2   73.25    3.57
   5  -8  -2   66.32    3.60
   5  -8  -3  111.77    4.69
   5  -8  -3   97.72    4.65
   5  -8  -4   50.03    2.74
  -5  -8  12   52.25    2.98
  -5  -8  13   35.21    2.35
  -5  -8  14   23.65    1.91
  -5  -8  15    0.91    0.99
   5  -9  14   22.43    1.36
   5  -9  13   39.41    2.06
   5  -9   9   45.16    2.59
   5  -9   8   23.99    1.43
   5  -9   8   26.68    2.03
   5  -9   7    7.64    1.49
   5  -9   7    9.52    1.03
   5  -9   6    6.28    1.54
   5  -9   6    6.28    1.02
   5  -9   5   77.83    3.37
   5  -9   5   79.64    3.81
   5  -9   4   44.04    2.28
   5  -9   4   45.14    2.71
   5  -9   3   29.53    2.22
   5  -9   2    6.10    1.51
   5  -9   1   66.81    3.39
   5  -9   0    3.54    1.27
   5  -9  -1   66.21    3.23
   5  -9  -2    5.35    1.12
   6   0   6   22.96    1.16
   6   0   7    6.66    0.67
   6   0   8  133.25    4.87
   6   0   9    5.75    0.66
   6   0  10    8.81    0.76
   6   0  11    1.32    0.51
   6  -1  13    9.78    0.78
   6  -1  12    8.36    0.80
   6  -1  11   22.40    1.29
   6  -1  10   13.65    1.05
   6  -1   9   83.91    3.35
   6  -1   8   17.05    1.19
   6  -1   7   86.44    3.45
   6  -1   6  145.29    5.38
   6  -1   5   43.77    2.00
   6  -1   4   44.54    1.98
   6  -1   3   51.20    2.15
   6  -1   2   62.42    2.48
   6  -2  13   57.67    2.34
   6  -2  12   27.34    1.41
   6  -2  11   17.14    1.14
   6  -2  10   23.92    1.39
   6  -2   9   30.92    1.62
   6  -2   8   16.41    1.18
   6  -2   7    9.88    0.98
   6  -2   6   32.69    1.69
   6  -2   5   45.86    2.13
   6  -2   4   57.89    2.50
   6  -2   3   12.74    1.00
   6  -2   2    8.18    0.83
   6  -2   1   33.48    1.59
   6  -2   0   32.46    1.52
   6  -2  -1   24.12    1.18
   6  -3  12    7.20    0.66
   6  -3  11   13.86    0.94
   6  -3  10   15.85    1.06
   6  -3   9   46.37    2.08
   6  -3   8   47.75    2.14
   6  -3   7   77.78    3.16
   6  -3   6   70.24    2.91
   6  -3   5   63.24    2.69
   6  -3   4  150.39    5.55
   6  -3   3   75.14    3.06
   6  -3   2   22.40    1.32
   6  -3   1   39.59    1.85
   6  -3   0  149.16    5.45
   6  -3  -1   31.72    1.51
   6  -4  10    1.44    0.45
   6  -4   9   13.45    0.87
   6  -4   8   32.95    1.55
   6  -4   7  138.97    5.09
   6  -4   6    3.74    0.69
   6  -4   5    5.35    0.74
   6  -4   4   90.19    3.50
   6  -4   3   26.52    1.41
   6  -4   2   31.03    1.55
   6  -4   1   38.36    1.77
   6  -4   0    1.25    0.57
   6  -5   5    9.20    0.70
   6  -5   4   23.48    1.18
   6  -5   3    4.74    0.57
   0   0   0    0.00    0.00


TITL lihi2 in P2(1)2(1)2(1)
REM P2(1)2(1)2(1) (#19 in standard setting)
CELL 1.54184   4.982610  13.071747  36.518875  90.0000  90.0000  90.0000
ZERR    5.00   0.000069   0.000155   0.000465   0.0000   0.0000   0.0000
LATT -1
SYMM -x+1/2,-y, z+1/2
SYMM -x, y+1/2,-z+1/2
SYMM  x+1/2,-y+1/2,-z
SFAC C H N O F
UNIT 100.00 80.00 10.00 15.00 10.00
TREF
HKLF 4
END
_computing_structure_solution     'SHELXT 2014/5 (Sheldrick, 2014)'
;
_shelx_hkl_checksum   65835
